# Supplementary material for: Dynamic Expression of Palmitoylation Regulators across Human Organ Development and Cancers Based on Bioinformatics
Source: MDPI journal article supplement (doi:10.3390/cimb44100306), 2022-09-27
Supplement: s1 [file s1]

# Supplementary Figures

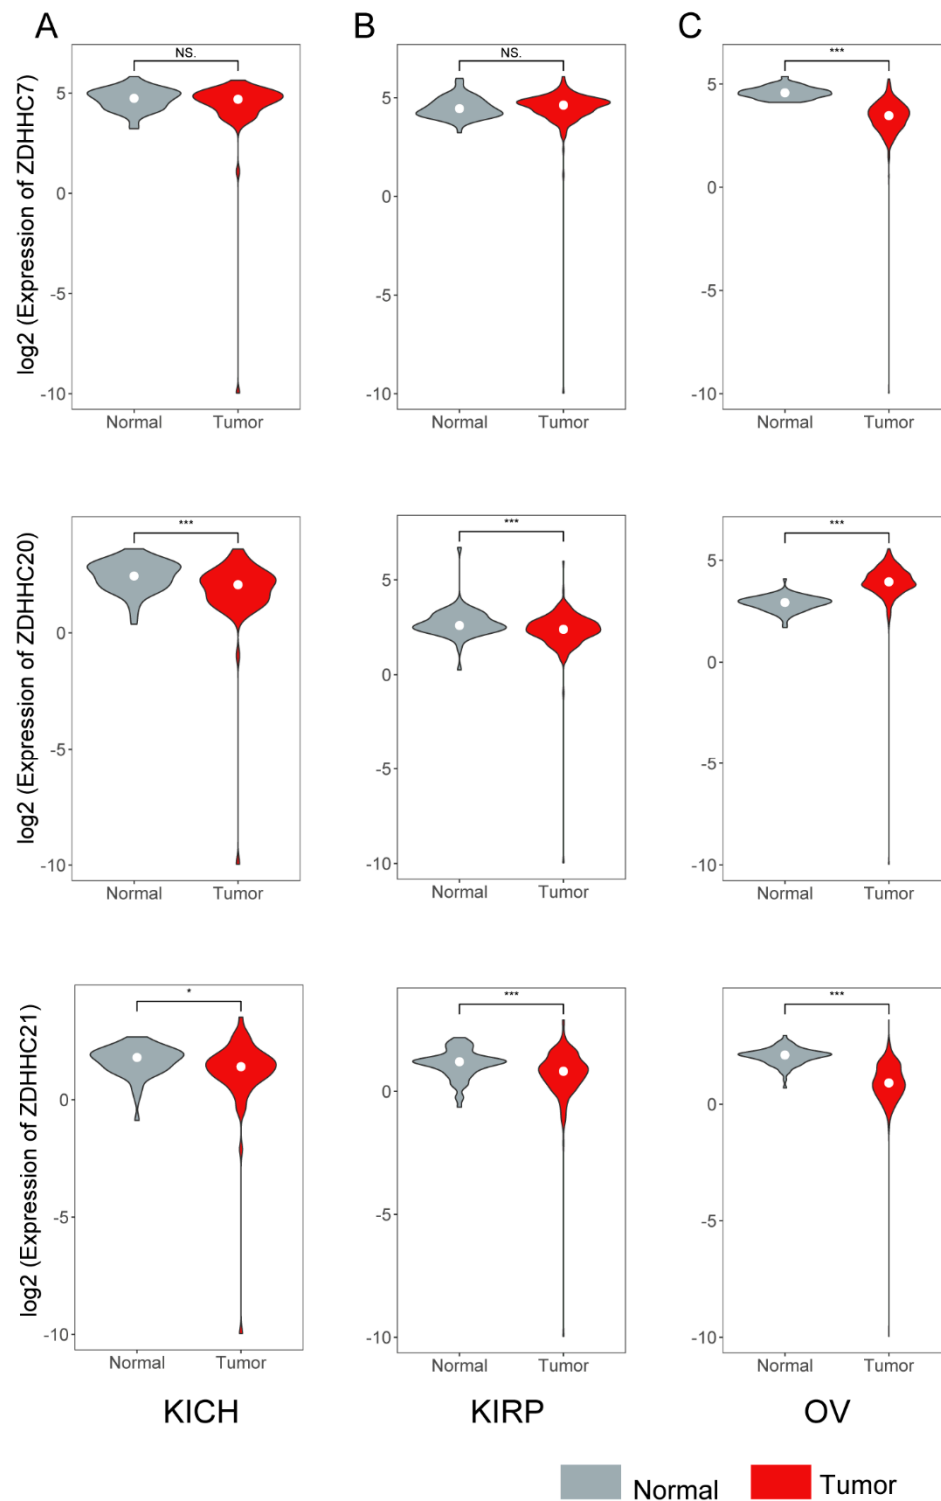

Figure S1. Expressions of ZDHHC7/20/21 across cancer types. \* indicates  $p < 0.05$ . \*\* indicates  $p < 0.01$ . \*\*\* indicates  $p < 0.001$ . "NS." represents no significant. A white dot represents "median" value.

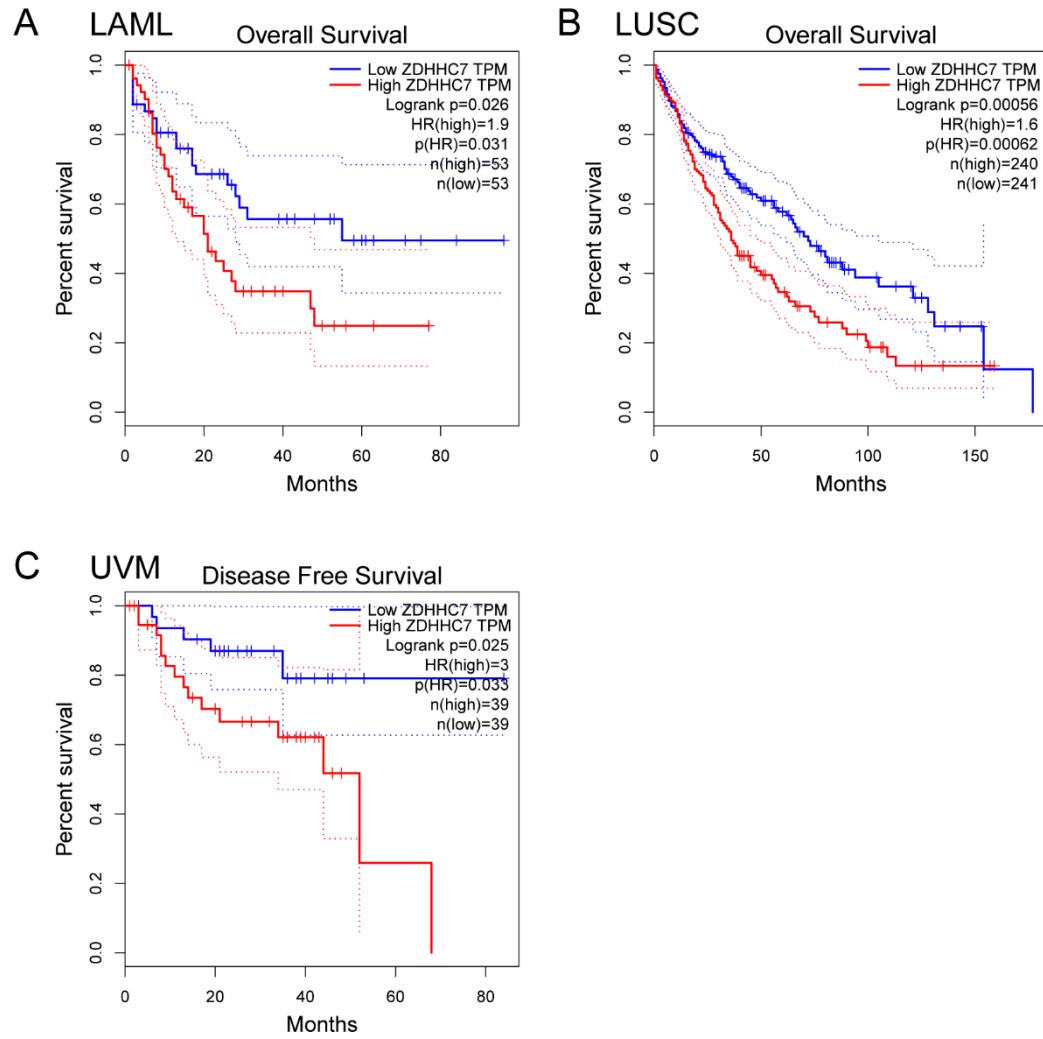

Supplementary Figure S2. Kaplan-Meier analysis of cancer patients in the ZDHHC7 high expression and low expression groups.
