# Supplementary material for: Dynamic Expression of Palmitoylation Regulators across Human Organ Development and Cancers Based on Bioinformatics
Source: Curr Issues Mol Biol. 2022 Sep 27;44(10):4472–89. doi: 10.3390/cimb44100306 (PMC9600046; doi:10.3390/cimb44100306)
Supplement: Supplementary file 1 [file cimb-44-00306-s001.zip]

Archive with 5 entries (5 files):
- Supplementary Figures.pdf
- Supplementary_Table S1.xlsx
- Supplementary_Table S2.csv
- Supplementary_Table S3.xlsx
- Supplementary_Table S4.csv
