# Supplementary material for: Dynamic Expression of Palmitoylation Regulators across Human Organ Development and Cancers Based on Bioinformatics
Source: Curr Issues Mol Biol. 2022 Sep 27;44(10):4472–89. doi: 10.3390/cimb44100306 (PMC9600046; doi:10.3390/cimb44100306)
Supplement: Supplementary file 1 [file cimb-44-00306-s001.zip › Supplementary_Table S1.xlsx]

## Sheet: TMB
	TMB	Expression	SampleName
GBM(N=149)	10.74	4.2173	TCGA-19-1787-01
GBM(N=149)	0.96	4.4357	TCGA-06-5412-01
GBM(N=149)	0.58	3.8033	TCGA-12-5299-01
GBM(N=149)	0.94	4.9709	TCGA-06-2565-01
GBM(N=149)	0.6	4.7565	TCGA-06-2561-01
GBM(N=149)	0.32	3.97	TCGA-06-0132-01
GBM(N=149)	1.44	4.5497	TCGA-19-2629-01
GBM(N=149)	0.72	3.2267	TCGA-06-0238-01
GBM(N=149)	0.8	3.6589	TCGA-06-0749-01
GBM(N=149)	1.18	4.4081	TCGA-06-0174-01
GBM(N=149)	0.38	4.3104	TCGA-06-5410-01
GBM(N=149)	1.5	4.518	TCGA-28-2513-01
GBM(N=149)	0.98	5.0828	TCGA-76-4929-01
GBM(N=149)	0.86	4.3039	TCGA-06-0645-01
GBM(N=149)	0.78	4.7581	TCGA-32-2634-01
GBM(N=149)	0.26	4.2111	TCGA-06-0141-01
GBM(N=149)	1.1	4.7981	TCGA-06-0125-01
GBM(N=149)	0.56	4.1954	TCGA-26-1442-01
GBM(N=149)	0.76	4.0523	TCGA-26-5136-01
GBM(N=149)	1.38	5.1656	TCGA-14-1034-01
GBM(N=149)	0.96	4.3527	TCGA-06-0184-01
GBM(N=149)	1	2.9581	TCGA-12-3652-01
GBM(N=149)	0.84	4.5565	TCGA-76-4927-01
GBM(N=149)	1.04	4.3371	TCGA-14-0790-01
GBM(N=149)	0.78	4.3772	TCGA-26-5132-01
GBM(N=149)	0.94	4.2389	TCGA-76-4932-01
GBM(N=149)	1.2	4.926	TCGA-32-1970-01
GBM(N=149)	0.72	2.3704	TCGA-06-0219-01
GBM(N=149)	0.62	4.0471	TCGA-14-0787-01
GBM(N=149)	0.76	3.6359	TCGA-12-0618-01
GBM(N=149)	0.64	2.8562	TCGA-27-2524-01
GBM(N=149)	0.22	5.2319	TCGA-08-0386-01
GBM(N=149)	1	4.7714	TCGA-06-0190-01
GBM(N=149)	0.88	4.0225	TCGA-06-0745-01
GBM(N=149)	0.92	4.1899	TCGA-26-5135-01
GBM(N=149)	0.54	4.1119	TCGA-41-3915-01
GBM(N=149)	0.94	1.8957	TCGA-27-1831-01
GBM(N=149)	0.78	4.8851	TCGA-28-1753-01
GBM(N=149)	1.24	3.245	TCGA-12-5295-01
GBM(N=149)	0.7	4.1571	TCGA-28-5204-01
GBM(N=149)	0.58	5.1165	TCGA-06-2569-01
GBM(N=149)	0.74	4.8827	TCGA-27-1830-01
GBM(N=149)	0.92	4.6288	TCGA-06-2559-01
GBM(N=149)	0.1	4.2965	TCGA-06-0139-01
GBM(N=149)	0.86	2.7161	TCGA-27-2526-01
GBM(N=149)	0.96	4.4713	TCGA-06-5856-01
GBM(N=149)	0.68	3.6635	TCGA-06-5418-01
GBM(N=149)	0.54	4.5802	TCGA-06-5414-01
GBM(N=149)	0.94	3.9691	TCGA-06-5417-01
GBM(N=149)	0.88	1.5854	TCGA-26-5134-01
GBM(N=149)	1.1	5.037	TCGA-76-4925-01
GBM(N=149)	0.48	4.8028	TCGA-28-2510-01
GBM(N=149)	0.8	4.5009	TCGA-06-5413-01
GBM(N=149)	0.58	4.6759	TCGA-06-0646-01
GBM(N=149)	0.84	3.832	TCGA-12-3650-01
GBM(N=149)	0.64	3.8808	TCGA-12-0616-01
GBM(N=149)	0.46	5.0492	TCGA-28-5215-01
GBM(N=149)	1.14	4.4602	TCGA-19-2620-01
GBM(N=149)	1.14	3.9608	TCGA-16-0846-01
GBM(N=149)	1.16	4.7437	TCGA-02-0047-01
GBM(N=149)	0.7	4.656	TCGA-19-2624-01
GBM(N=149)	1.16	4.3604	TCGA-32-1982-01
GBM(N=149)	1.16	4.4183	TCGA-27-1835-01
GBM(N=149)	1.26	4.6136	TCGA-06-0747-01
GBM(N=149)	0.58	4.061	TCGA-28-5220-01
GBM(N=149)	1.2	3.3148	TCGA-14-0817-01
GBM(N=149)	0.56	4.3814	TCGA-06-2570-01
GBM(N=149)	0.52	4.6588	TCGA-41-4097-01
GBM(N=149)	0.94	4.65909	TCGA-06-0211-01
GBM(N=149)	0.76	4.0091	TCGA-02-2483-01
GBM(N=149)	0.72	4.7991	TCGA-76-4931-01
GBM(N=149)	0.78	4.6393	TCGA-27-2523-01
GBM(N=149)	0.68	4.4562	TCGA-27-1837-01
GBM(N=149)	1.18	3.6324	TCGA-06-0744-01
GBM(N=149)	0.68	3.7571	TCGA-06-0750-01
GBM(N=149)	1.04	3.5149	TCGA-32-5222-01
GBM(N=149)	0.74	4.4887	TCGA-27-2519-01
GBM(N=149)	1.18	4.5736	TCGA-12-0821-01
GBM(N=149)	0.84	4.7913	TCGA-19-2619-01
GBM(N=149)	0.94	4.8997	TCGA-12-0619-01
GBM(N=149)	0.84	3.506	TCGA-28-5213-01
GBM(N=149)	1.08	5.0299	TCGA-14-0789-01
GBM(N=149)	1.5	4.7971	TCGA-28-5209-01
GBM(N=149)	0.32	4.7231	TCGA-28-5218-01
GBM(N=149)	0.88	4.7464	TCGA-28-2514-01
GBM(N=149)	0.78	4.0627	TCGA-06-5859-01
GBM(N=149)	0.88	4.5632	TCGA-28-2509-01
GBM(N=149)	0.92	4.4906	TCGA-14-1825-01
GBM(N=149)	0.82	4.2601	TCGA-19-4065-01
GBM(N=149)	1	4.2304	TCGA-02-2485-01
GBM(N=149)	1.04	3.1908	TCGA-12-1597-01
GBM(N=149)	0.84	4.656	TCGA-28-1747-01
GBM(N=149)	0.52	4.1595	TCGA-28-2499-01
GBM(N=149)	1.48	4.2009	TCGA-06-0649-01
GBM(N=149)	1	5.109	TCGA-06-2564-01
GBM(N=149)	0.72	4.7415	TCGA-06-5408-01
GBM(N=149)	0.6	3.6827	TCGA-27-1832-01
GBM(N=149)	0.72	2.2082	TCGA-14-1829-01
GBM(N=149)	0.54	4.6747	TCGA-32-2615-01
GBM(N=149)	0.84	4.8284	TCGA-06-0158-01
GBM(N=149)	1.28	4.6335	TCGA-06-2558-01
GBM(N=149)	0.72	4.178	TCGA-28-5216-01
GBM(N=149)	0.78	4.735	TCGA-28-5207-01
GBM(N=149)	0.8	3.8501	TCGA-41-2572-01
GBM(N=149)	0.54	5.1946	TCGA-06-0130-01
GBM(N=149)	204.9	3.6125	TCGA-06-5416-01
GBM(N=149)	0.66	3.4804	TCGA-06-0168-01
GBM(N=149)	0.92	4.3406	TCGA-02-0055-01
GBM(N=149)	0.86	4.1466	TCGA-06-5415-01
GBM(N=149)	0.48	4.1236	TCGA-06-5411-01
GBM(N=149)	0.74	4.4562	TCGA-26-5139-01
GBM(N=149)	1.32	4.2862	TCGA-76-4928-01
GBM(N=149)	0.9	4.6702	TCGA-06-0644-01
GBM(N=149)	0.94	4.0091	TCGA-14-0871-01
GBM(N=149)	1.54	4.4081	TCGA-32-2632-01
GBM(N=149)	0.58	4.7187	TCGA-06-0882-01
GBM(N=149)	0.98	4.1285	TCGA-19-2625-01
GBM(N=149)	0.24	4.4542	TCGA-32-1980-01
GBM(N=149)	0.8	4.5964	TCGA-27-1834-01
GBM(N=149)	0.76	3.7836	TCGA-41-2571-01
GBM(N=149)	0.52	4.7005	TCGA-14-0781-01
GBM(N=149)	0.86	4.439	TCGA-06-0157-01
GBM(N=149)	0.52	4.6623	TCGA-12-3653-01
GBM(N=149)	1.02	4.7318	TCGA-76-4926-01
GBM(N=149)	0.58	4.4932	TCGA-26-5133-01
GBM(N=149)	1.08	4.7851	TCGA-06-2562-01
GBM(N=149)	0.98	3.87	TCGA-27-2521-01
GBM(N=149)	1.38	3.4156	TCGA-41-5651-01
GBM(N=149)	1.02	4.4417	TCGA-06-0210-01
GBM(N=149)	0.74	4.8202	TCGA-19-5960-01
GBM(N=149)	1.02	4.1327	TCGA-06-0686-01
GBM(N=149)	1.18	4.7005	TCGA-06-2563-01
GBM(N=149)	0.76	2.2452	TCGA-32-4213-01
GBM(N=149)	1.2	4.4061	TCGA-15-0742-01
GBM(N=149)	0.8	4.7704	TCGA-06-0187-01
GBM(N=149)	1.7	4.9887	TCGA-19-1390-01
GBM(N=149)	0.68	4.4874	TCGA-06-2557-01
GBM(N=149)	0.64	4.8655	TCGA-06-0878-01
GBM(N=149)	0.66	4.7929	TCGA-06-0129-01
GBM(N=149)	1.2	4.9336	TCGA-16-1045-01
GBM(N=149)	0.86	4.4364	TCGA-06-2567-01
GBM(N=149)	18.58	4.7088	TCGA-32-2616-01
GBM(N=149)	1.02	4.1962	TCGA-28-5208-01
GBM(N=149)	1.2	5.4313	TCGA-06-1804-01
GBM(N=149)	1.18	2.8955	TCGA-14-2554-01
GBM(N=149)	1	4.166	TCGA-27-2528-01
GBM(N=149)	3.04	4.8958	TCGA-06-5858-01
GBM(N=149)	1.08	3.1637	TCGA-14-1823-01
GBM(N=149)	1.54	3.9571	TCGA-06-0743-01
GBMLGG(N=650)	10.74	4.2173	TCGA-19-1787-01
GBMLGG(N=650)	0.18	4.5349	TCGA-S9-A7J2-01
GBMLGG(N=650)	0.8	4.7426	TCGA-E1-A7YI-01
GBMLGG(N=650)	0.96	4.4357	TCGA-06-5412-01
GBMLGG(N=650)	0.7	4.7016	TCGA-DU-7302-01
GBMLGG(N=650)	0.58	3.8033	TCGA-12-5299-01
GBMLGG(N=650)	0.4	4.2533	TCGA-P5-A5EX-01
GBMLGG(N=650)	0.42	5.3045	TCGA-HT-8563-01
GBMLGG(N=650)	0.4	4.4874	TCGA-FG-A60K-01
GBMLGG(N=650)	0.94	4.9709	TCGA-06-2565-01
GBMLGG(N=650)	0.6	4.7565	TCGA-06-2561-01
GBMLGG(N=650)	0.6	5.1526	TCGA-CS-5397-01
GBMLGG(N=650)	0.4	4.5862	TCGA-E1-5322-01
GBMLGG(N=650)	0.08	4.2995	TCGA-HT-8558-01
GBMLGG(N=650)	0.44	4.4732	TCGA-S9-A6U8-01
GBMLGG(N=650)	0.38	4.5305	TCGA-HT-7854-01
GBMLGG(N=650)	0.52	4.1716	TCGA-HT-7467-01
GBMLGG(N=650)	0.48	4.2373	TCGA-HT-7874-01
GBMLGG(N=650)	0.66	4.6759	TCGA-S9-A6TV-01
GBMLGG(N=650)	0.36	4.2987	TCGA-VM-A8CD-01
GBMLGG(N=650)	0.32	3.97	TCGA-06-0132-01
GBMLGG(N=650)	0.74	4.4938	TCGA-HT-7616-01
GBMLGG(N=650)	0.7	4.691	TCGA-KT-A7W1-01
GBMLGG(N=650)	0.54	4.3442	TCGA-P5-A5F2-01
GBMLGG(N=650)	1.44	4.5497	TCGA-19-2629-01
GBMLGG(N=650)	0.48	4.2025	TCGA-HT-7607-01
GBMLGG(N=650)	0.72	3.2267	TCGA-06-0238-01
GBMLGG(N=650)	0.46	4.9612	TCGA-HT-7873-01
GBMLGG(N=650)	0.8	3.6589	TCGA-06-0749-01
GBMLGG(N=650)	0.42	4.0541	TCGA-HT-7603-01
GBMLGG(N=650)	0.5	4.197	TCGA-DB-A64P-01
GBMLGG(N=650)	1.18	4.4081	TCGA-06-0174-01
GBMLGG(N=650)	0.16	4.1939	TCGA-HW-7486-01
GBMLGG(N=650)	0.32	4.284	TCGA-P5-A5F1-01
GBMLGG(N=650)	0.34	3.8401	TCGA-DU-7011-01
GBMLGG(N=650)	0.54	3.7961	TCGA-P5-A77X-01
GBMLGG(N=650)	0.46	3.8759	TCGA-VM-A8CA-01
GBMLGG(N=650)	0.64	4.4183	TCGA-DU-7015-01
GBMLGG(N=650)	0.5	4.0153	TCGA-TM-A7C5-01
GBMLGG(N=650)	0.4	4.565	TCGA-DU-8162-01
GBMLGG(N=650)	0.5	4.2995	TCGA-TM-A84O-01
GBMLGG(N=650)	0.38	4.3104	TCGA-06-5410-01
GBMLGG(N=650)	0.54	4.1409	TCGA-S9-A7R3-01
GBMLGG(N=650)	0.44	4.5021	TCGA-TQ-A7RN-01
GBMLGG(N=650)	1.5	4.518	TCGA-28-2513-01
GBMLGG(N=650)	0.22	4.281	TCGA-DU-A6S6-01
GBMLGG(N=650)	0.48	4.4437	TCGA-P5-A735-01
GBMLGG(N=650)	0.08	4.2064	TCGA-HT-7691-01
GBMLGG(N=650)	0.32	3.4384	TCGA-FG-A6J1-01
GBMLGG(N=650)	0.42	5.0308	TCGA-S9-A7R7-01
GBMLGG(N=650)	0.98	5.0828	TCGA-76-4929-01
GBMLGG(N=650)	0.74	4.8465	TCGA-DU-6402-01
GBMLGG(N=650)	0.6	3.2885	TCGA-HT-7684-01
GBMLGG(N=650)	1	4.8954	TCGA-HT-8104-01
GBMLGG(N=650)	0.36	4.4615	TCGA-FN-7833-01
GBMLGG(N=650)	0.34	4.7592	TCGA-HT-7473-01
GBMLGG(N=650)	0.86	4.3039	TCGA-06-0645-01
GBMLGG(N=650)	0.46	4.8324	TCGA-TQ-A7RU-01
GBMLGG(N=650)	0.52	4.306	TCGA-DB-A4XF-01
GBMLGG(N=650)	0.42	4.4304	TCGA-FG-A713-01
GBMLGG(N=650)	0.86	4.2556	TCGA-E1-A7YL-01
GBMLGG(N=650)	0.52	4.964	TCGA-CS-5396-01
GBMLGG(N=650)	0.48	4.783	TCGA-HW-8322-01
GBMLGG(N=650)	0.34	4.0943	TCGA-S9-A6U9-01
GBMLGG(N=650)	0.24	4.1466	TCGA-HT-7676-01
GBMLGG(N=650)	0.58	4.7793	TCGA-HT-7469-01
GBMLGG(N=650)	0.78	4.7581	TCGA-32-2634-01
GBMLGG(N=650)	0.52	4.4938	TCGA-HT-7478-01
GBMLGG(N=650)	0.76	4.497	TCGA-DU-A5TW-01
GBMLGG(N=650)	0.6	3.945	TCGA-S9-A6TX-01
GBMLGG(N=650)	0.86	3.981	TCGA-RY-A83Z-01
GBMLGG(N=650)	0.26	4.2111	TCGA-06-0141-01
GBMLGG(N=650)	1.1	4.7981	TCGA-06-0125-01
GBMLGG(N=650)	0.88	3.5022	TCGA-FG-A6IZ-01
GBMLGG(N=650)	0.88	4.7997	TCGA-CS-4941-01
GBMLGG(N=650)	0.32	3.9874	TCGA-DH-A7UT-01
GBMLGG(N=650)	0.48	4.3053	TCGA-DU-5871-01
GBMLGG(N=650)	0.54	4.327	TCGA-HW-8321-01
GBMLGG(N=650)	0.42	4.9915	TCGA-EZ-7264-01
GBMLGG(N=650)	0.66	4.4713	TCGA-CS-6666-01
GBMLGG(N=650)	0.26	4.8074	TCGA-HW-7491-01
GBMLGG(N=650)	0.3	4.7533	TCGA-S9-A6U1-01
GBMLGG(N=650)	1.04	4.551	TCGA-E1-5307-01
GBMLGG(N=650)	0.64	4.7751	TCGA-DU-A76L-01
GBMLGG(N=650)	0.3	4.3292	TCGA-HW-7495-01
GBMLGG(N=650)	0	4.0295	TCGA-CS-6669-01
GBMLGG(N=650)	0.54	4.1756	TCGA-HT-7481-01
GBMLGG(N=650)	0.26	4.7426	TCGA-DU-8163-01
GBMLGG(N=650)	0.56	4.1954	TCGA-26-1442-01
GBMLGG(N=650)	7.14	4.8763	TCGA-HT-8110-01
GBMLGG(N=650)	0.24	4.0653	TCGA-RY-A840-01
GBMLGG(N=650)	0.1	3.837	TCGA-VM-A8C9-01
GBMLGG(N=650)	0.5	4.9246	TCGA-HW-8319-01
GBMLGG(N=650)	0.74	4.7523	TCGA-QH-A6CW-01
GBMLGG(N=650)	0.22	4.8017	TCGA-DU-5870-01
GBMLGG(N=650)	0.28	3.9515	TCGA-TM-A84S-01
GBMLGG(N=650)	0.76	4.0523	TCGA-26-5136-01
GBMLGG(N=650)	1.38	5.1656	TCGA-14-1034-01
GBMLGG(N=650)	0.96	4.3527	TCGA-06-0184-01
GBMLGG(N=650)	1	2.9581	TCGA-12-3652-01
GBMLGG(N=650)	0.48	4.673	TCGA-RY-A845-01
GBMLGG(N=650)	0.84	4.5565	TCGA-76-4927-01
GBMLGG(N=650)	0.48	4.918	TCGA-FG-8182-01
GBMLGG(N=650)	1.04	4.3371	TCGA-14-0790-01
GBMLGG(N=650)	0.78	4.3772	TCGA-26-5132-01
GBMLGG(N=650)	1.06	4.2181	TCGA-FG-6688-01
GBMLGG(N=650)	0.8	4.6462	TCGA-TQ-A7RP-01
GBMLGG(N=650)	0.36	4.1859	TCGA-HT-8113-01
GBMLGG(N=650)	0.94	4.2389	TCGA-76-4932-01
GBMLGG(N=650)	0.74	4.5748	TCGA-HT-7689-01
GBMLGG(N=650)	0.28	3.8044	TCGA-FG-7638-01
GBMLGG(N=650)	0.64	4.6323	TCGA-DU-7013-01
GBMLGG(N=650)	1.2	4.926	TCGA-32-1970-01
GBMLGG(N=650)	0.28	4.5199	TCGA-E1-A7Z3-01
GBMLGG(N=650)	0.4	3.8054	TCGA-HT-7476-01
GBMLGG(N=650)	0.48	4.511	TCGA-TQ-A7RG-01
GBMLGG(N=650)	2.04	4.2212	TCGA-DU-A7T6-01
GBMLGG(N=650)	0.38	4.728	TCGA-DB-A4XC-01
GBMLGG(N=650)	1.1	4.1636	TCGA-FG-A4MW-01
GBMLGG(N=650)	0.72	2.3704	TCGA-06-0219-01
GBMLGG(N=650)	0.54	4.3681	TCGA-DH-5142-01
GBMLGG(N=650)	0.62	4.0471	TCGA-14-0787-01
GBMLGG(N=650)	0.44	4.7038	TCGA-S9-A6U2-01
GBMLGG(N=650)	0.76	3.6359	TCGA-12-0618-01
GBMLGG(N=650)	0.64	2.8562	TCGA-27-2524-01
GBMLGG(N=650)	0.68	4.3855	TCGA-TQ-A7RH-01
GBMLGG(N=650)	0.22	5.2319	TCGA-08-0386-01
GBMLGG(N=650)	0.46	4.4476	TCGA-DB-A75M-01
GBMLGG(N=650)	0.4	4.4758	TCGA-HT-8012-01
GBMLGG(N=650)	0.56	4.5374	TCGA-S9-A7QW-01
GBMLGG(N=650)	0.56	3.47	TCGA-P5-A733-01
GBMLGG(N=650)	0.32	4.178	TCGA-E1-A7Z4-01
GBMLGG(N=650)	0.7	3.8177	TCGA-DU-A5TR-01
GBMLGG(N=650)	0.58	4.1449	TCGA-FG-8185-01
GBMLGG(N=650)	0.46	4.7318	TCGA-HW-8320-01
GBMLGG(N=650)	0.46	4.0162	TCGA-CS-6667-01
GBMLGG(N=650)	0.56	4.4115	TCGA-DU-5849-01
GBMLGG(N=650)	0.7	4.2684	TCGA-DB-5279-01
GBMLGG(N=650)	1	4.7714	TCGA-06-0190-01
GBMLGG(N=650)	0.58	4.0506	TCGA-CS-6670-01
GBMLGG(N=650)	0.5	3.8033	TCGA-DB-A64V-01
GBMLGG(N=650)	0.88	4.0225	TCGA-06-0745-01
GBMLGG(N=650)	0.8	4.5497	TCGA-DU-5854-01
GBMLGG(N=650)	1.06	4.3772	TCGA-DH-A7UR-01
GBMLGG(N=650)	0.98	4.5361	TCGA-S9-A6WL-01
GBMLGG(N=650)	0.12	4.0943	TCGA-HT-7880-01
GBMLGG(N=650)	0.92	4.1899	TCGA-26-5135-01
GBMLGG(N=650)	0.68	4.2396	TCGA-E1-5318-01
GBMLGG(N=650)	0.48	4.8445	TCGA-DU-6393-01
GBMLGG(N=650)	0.54	4.1119	TCGA-41-3915-01
GBMLGG(N=650)	0.38	4.2728	TCGA-DU-5853-01
GBMLGG(N=650)	0.64	4.5952	TCGA-TM-A84J-01
GBMLGG(N=650)	0.68	4.4686	TCGA-FG-5962-01
GBMLGG(N=650)	0.94	1.8957	TCGA-27-1831-01
GBMLGG(N=650)	0.48	4.3548	TCGA-F6-A8O4-01
GBMLGG(N=650)	0.78	4.8851	TCGA-28-1753-01
GBMLGG(N=650)	0.34	3.8218	TCGA-S9-A7R1-01
GBMLGG(N=650)	1.24	3.245	TCGA-12-5295-01
GBMLGG(N=650)	0.54	4.756	TCGA-TM-A84M-01
GBMLGG(N=650)	0.02	4.3999	TCGA-HT-8107-01
GBMLGG(N=650)	0.36	4.3119	TCGA-P5-A5ET-01
GBMLGG(N=650)	0.72	3.9801	TCGA-P5-A72W-01
GBMLGG(N=650)	0.3	4.3242	TCGA-FG-A70Y-01
GBMLGG(N=650)	0.1	4.4061	TCGA-TM-A84R-01
GBMLGG(N=650)	0.34	4.565	TCGA-HW-A5KM-01
GBMLGG(N=650)	0.84	4.8415	TCGA-HT-7477-01
GBMLGG(N=650)	1.06	4.3406	TCGA-FG-A87Q-01
GBMLGG(N=650)	1	4.3814	TCGA-FG-A70Z-01
GBMLGG(N=650)	1.02	4.673	TCGA-FG-A4MU-01
GBMLGG(N=650)	0.5	5.2262	TCGA-DB-A4XB-01
GBMLGG(N=650)	0.64	4.3827	TCGA-WY-A85D-01
GBMLGG(N=650)	0.46	4.3349	TCGA-FG-7641-01
GBMLGG(N=650)	0.48	3.9728	TCGA-DU-5872-01
GBMLGG(N=650)	0.36	4.131	TCGA-FG-6689-01
GBMLGG(N=650)	0.7	4.6502	TCGA-DB-5277-01
GBMLGG(N=650)	0.7	4.1571	TCGA-28-5204-01
GBMLGG(N=650)	0.64	4.5466	TCGA-HT-A615-01
GBMLGG(N=650)	0.5	4.5398	TCGA-DU-7301-01
GBMLGG(N=650)	0.28	4.5657	TCGA-P5-A5EW-01
GBMLGG(N=650)	0.58	5.1165	TCGA-06-2569-01
GBMLGG(N=650)	0.3	4.1796	TCGA-HT-A5RB-01
GBMLGG(N=650)	1.08	4.7751	TCGA-E1-A7YN-01
GBMLGG(N=650)	0.74	4.8827	TCGA-27-1830-01
GBMLGG(N=650)	0.82	4.3869	TCGA-QH-A6XC-01
GBMLGG(N=650)	0.92	4.6288	TCGA-06-2559-01
GBMLGG(N=650)	0.62	4.9336	TCGA-S9-A6WN-01
GBMLGG(N=650)	0.1	4.2965	TCGA-06-0139-01
GBMLGG(N=650)	1.38	4.2921	TCGA-DB-A64L-01
GBMLGG(N=650)	0.6	4.8812	TCGA-TM-A84I-01
GBMLGG(N=650)	0.56	4.2965	TCGA-QH-A6CZ-01
GBMLGG(N=650)	0.58	3.794	TCGA-WY-A858-01
GBMLGG(N=650)	0.44	4.3031	TCGA-VM-A8CB-01
GBMLGG(N=650)	0.86	2.7161	TCGA-27-2526-01
GBMLGG(N=650)	0.64	3.5694	TCGA-VM-A8CF-01
GBMLGG(N=650)	0.96	4.4713	TCGA-06-5856-01
GBMLGG(N=650)	0.36	3.7367	TCGA-HT-7608-01
GBMLGG(N=650)	0.28	4.1482	TCGA-CS-4938-01
GBMLGG(N=650)	0.48	3.8905	TCGA-QH-A6X5-01
GBMLGG(N=650)	0.48	4.84	TCGA-DU-8166-01
GBMLGG(N=650)	0.36	4.8694	TCGA-HT-8018-01
GBMLGG(N=650)	0.7	4.63	TCGA-DU-7292-01
GBMLGG(N=650)	0.28	4.0322	TCGA-S9-A6TU-01
GBMLGG(N=650)	0.06	3.9478	TCGA-DB-A75P-01
GBMLGG(N=650)	0.68	3.6635	TCGA-06-5418-01
GBMLGG(N=650)	0.22	5.0409	TCGA-FG-6691-01
GBMLGG(N=650)	0.84	4.7597	TCGA-DU-6399-01
GBMLGG(N=650)	0.3	4.4033	TCGA-S9-A7IQ-01
GBMLGG(N=650)	0.54	4.5802	TCGA-06-5414-01
GBMLGG(N=650)	0.4	3.9204	TCGA-S9-A6WI-01
GBMLGG(N=650)	0.18	4.2987	TCGA-DB-A64S-01
GBMLGG(N=650)	1.2	4.2204	TCGA-FG-6692-01
GBMLGG(N=650)	0.34	4.2358	TCGA-HW-7489-01
GBMLGG(N=650)	0.18	4.656	TCGA-R8-A6YH-01
GBMLGG(N=650)	0.94	3.9691	TCGA-06-5417-01
GBMLGG(N=650)	0.4	4.4938	TCGA-HT-A618-01
GBMLGG(N=650)	0.88	1.5854	TCGA-26-5134-01
GBMLGG(N=650)	0.34	3.9829	TCGA-QH-A65S-01
GBMLGG(N=650)	0.48	4.2899	TCGA-DU-7019-01
GBMLGG(N=650)	1.1	5.037	TCGA-76-4925-01
GBMLGG(N=650)	0.68	4.9007	TCGA-DU-A7TJ-01
GBMLGG(N=650)	0.74	4.5255	TCGA-TM-A84H-01
GBMLGG(N=650)	0.48	4.8028	TCGA-28-2510-01
GBMLGG(N=650)	0.5	4.2877	TCGA-S9-A7R8-01
GBMLGG(N=650)	0.42	4.2624	TCGA-S9-A7R4-01
GBMLGG(N=650)	0.46	4.641	TCGA-S9-A7J3-01
GBMLGG(N=650)	0.36	4.3292	TCGA-TM-A84L-01
GBMLGG(N=650)	0.44	4.3632	TCGA-E1-A7YH-01
GBMLGG(N=650)	0.8	4.5009	TCGA-06-5413-01
GBMLGG(N=650)	0.58	4.6759	TCGA-06-0646-01
GBMLGG(N=650)	1.46	4.5261	TCGA-P5-A5EV-01
GBMLGG(N=650)	0.68	5.0553	TCGA-DU-A7TD-01
GBMLGG(N=650)	0.4	4.0046	TCGA-HW-A5KL-01
GBMLGG(N=650)	0.26	4.3834	TCGA-RY-A83X-01
GBMLGG(N=650)	0.7	4.9031	TCGA-HT-7687-01
GBMLGG(N=650)	0.2	4.2009	TCGA-WY-A85A-01
GBMLGG(N=650)	0.84	3.832	TCGA-12-3650-01
GBMLGG(N=650)	0.92	4.8385	TCGA-DB-5281-01
GBMLGG(N=650)	0.92	4.421	TCGA-E1-A7YK-01
GBMLGG(N=650)	0.72	4.2427	TCGA-DU-A5TU-01
GBMLGG(N=650)	0.64	4.5802	TCGA-DU-A7TA-01
GBMLGG(N=650)	0.74	4.862	TCGA-CS-5395-01
GBMLGG(N=650)	0.44	4.5349	TCGA-TQ-A7RR-01
GBMLGG(N=650)	0.44	4.1595	TCGA-HT-A5R5-01
GBMLGG(N=650)	0.64	3.8808	TCGA-12-0616-01
GBMLGG(N=650)	0.42	3.83	TCGA-QH-A65V-01
GBMLGG(N=650)	0.64	4.3046	TCGA-S9-A6WP-01
GBMLGG(N=650)	0.46	5.0492	TCGA-28-5215-01
GBMLGG(N=650)	1.14	4.4602	TCGA-19-2620-01
GBMLGG(N=650)	0.32	4.0532	TCGA-S9-A6U5-01
GBMLGG(N=650)	0.62	4.6854	TCGA-E1-A7YO-01
GBMLGG(N=650)	0.44	4.8625	TCGA-QH-A6X8-01
GBMLGG(N=650)	0.28	4.7285	TCGA-HT-7610-01
GBMLGG(N=650)	0.54	4.5687	TCGA-HT-7875-01
GBMLGG(N=650)	1.14	3.9608	TCGA-16-0846-01
GBMLGG(N=650)	0.44	3.8269	TCGA-R8-A6MK-01
GBMLGG(N=650)	0.52	4.481	TCGA-P5-A5F0-01
GBMLGG(N=650)	0.52	4.287	TCGA-R8-A73M-01
GBMLGG(N=650)	1.16	4.7437	TCGA-02-0047-01
GBMLGG(N=650)	1.12	4.4243	TCGA-S9-A6TS-01
GBMLGG(N=650)	0.52	3.74	TCGA-S9-A6TW-01
GBMLGG(N=650)	0.52	3.9002	TCGA-E1-5303-01
GBMLGG(N=650)	0.46	4.4549	TCGA-HT-7606-01
GBMLGG(N=650)	0.3	4.4634	TCGA-DU-6408-01
GBMLGG(N=650)	0.66	4.1946	TCGA-FG-5964-01
GBMLGG(N=650)	0.36	4.5754	TCGA-DB-A64Q-01
GBMLGG(N=650)	0.48	4.481	TCGA-S9-A7IZ-01
GBMLGG(N=650)	1.22	4.096	TCGA-S9-A6WH-01
GBMLGG(N=650)	0.24	3.866	TCGA-HT-7602-01
GBMLGG(N=650)	0.7	4.656	TCGA-19-2624-01
GBMLGG(N=650)	0.9	4.3335	TCGA-DU-A6S8-01
GBMLGG(N=650)	0.34	4.3972	TCGA-HT-7858-01
GBMLGG(N=650)	1.16	4.3604	TCGA-32-1982-01
GBMLGG(N=650)	1.16	4.4183	TCGA-27-1835-01
GBMLGG(N=650)	1.2	5.0747	TCGA-HT-7860-01
GBMLGG(N=650)	1.04	5.2025	TCGA-DU-7006-01
GBMLGG(N=650)	0.3	4.3321	TCGA-TQ-A7RS-01
GBMLGG(N=650)	0.34	4.3119	TCGA-DU-7009-01
GBMLGG(N=650)	1.26	4.6136	TCGA-06-0747-01
GBMLGG(N=650)	1.62	4.8405	TCGA-DU-7010-01
GBMLGG(N=650)	0.4	4.2892	TCGA-QH-A6X3-01
GBMLGG(N=650)	0.6	4.9575	TCGA-DU-8164-01
GBMLGG(N=650)	0.6	3.9737	TCGA-DU-7018-01
GBMLGG(N=650)	0.3	4.3744	TCGA-RY-A843-01
GBMLGG(N=650)	0.56	4.6571	TCGA-HT-7693-01
GBMLGG(N=650)	1.12	3.3047	TCGA-FG-A6J3-01
GBMLGG(N=650)	0.58	4.061	TCGA-28-5220-01
GBMLGG(N=650)	0.52	5.2419	TCGA-HT-8106-01
GBMLGG(N=650)	0.28	4.6445	TCGA-HT-7472-01
GBMLGG(N=650)	1.2	3.3148	TCGA-14-0817-01
GBMLGG(N=650)	0.6	4.2556	TCGA-HT-7855-01
GBMLGG(N=650)	0.56	4.3814	TCGA-06-2570-01
GBMLGG(N=650)	0.34	4.8545	TCGA-DB-A4XG-01
GBMLGG(N=650)	0.84	4.6702	TCGA-HT-A5RC-01
GBMLGG(N=650)	0.64	4.5318	TCGA-VM-A8C8-01
GBMLGG(N=650)	0.22	4.4061	TCGA-HT-7681-01
GBMLGG(N=650)	0.52	4.6588	TCGA-41-4097-01
GBMLGG(N=650)	0.28	4.2684	TCGA-DU-A6S2-01
GBMLGG(N=650)	0.6	4.0739	TCGA-DU-7309-01
GBMLGG(N=650)	0.66	3.6219	TCGA-DB-A4XH-01
GBMLGG(N=650)	0.26	4.3855	TCGA-HT-7485-01
GBMLGG(N=650)	0.6	4.4162	TCGA-VW-A7QS-01
GBMLGG(N=650)	0.94	4.65909	TCGA-06-0211-01
GBMLGG(N=650)	0.22	4.1466	TCGA-VV-A86M-01
GBMLGG(N=650)	0.68	4.322	TCGA-E1-A7YV-01
GBMLGG(N=650)	0.26	4.8778	TCGA-HT-7468-01
GBMLGG(N=650)	0.76	4.0091	TCGA-02-2483-01
GBMLGG(N=650)	0.64	4.958	TCGA-HT-7677-01
GBMLGG(N=650)	0.72	4.7991	TCGA-76-4931-01
GBMLGG(N=650)	0.82	4.2616	TCGA-DU-A5TY-01
GBMLGG(N=650)	0.62	4.2495	TCGA-HT-8109-01
GBMLGG(N=650)	0.46	3.97	TCGA-HT-7479-01
GBMLGG(N=650)	0.7	4.4913	TCGA-DB-5275-01
GBMLGG(N=650)	0.62	4.2389	TCGA-TM-A7C4-01
GBMLGG(N=650)	0.78	4.6393	TCGA-27-2523-01
GBMLGG(N=650)	0.68	4.4562	TCGA-27-1837-01
GBMLGG(N=650)	0.76	4.449	TCGA-DH-A7UU-01
GBMLGG(N=650)	1.18	3.6324	TCGA-06-0744-01
GBMLGG(N=650)	0.28	4.2095	TCGA-HT-A4DV-01
GBMLGG(N=650)	0.48	4.6793	TCGA-FG-8186-01
GBMLGG(N=650)	0.28	4.6212	TCGA-FG-A4MT-01
GBMLGG(N=650)	0.5	4.4357	TCGA-E1-5305-01
GBMLGG(N=650)	0.38	4.1644	TCGA-CS-5393-01
GBMLGG(N=650)	0.36	4.0799	TCGA-DU-6395-01
GBMLGG(N=650)	1.12	3.834	TCGA-DB-A64X-01
GBMLGG(N=650)	0.88	4.3938	TCGA-S9-A7IS-01
GBMLGG(N=650)	4.28	4.1668	TCGA-HT-7856-01
GBMLGG(N=650)	0.68	3.7571	TCGA-06-0750-01
GBMLGG(N=650)	1.04	3.5149	TCGA-32-5222-01
GBMLGG(N=650)	0.18	4.0532	TCGA-QH-A6XA-01
GBMLGG(N=650)	0.44	3.8944	TCGA-P5-A77W-01
GBMLGG(N=650)	0.74	4.4887	TCGA-27-2519-01
GBMLGG(N=650)	0.42	4.5485	TCGA-CS-4942-01
GBMLGG(N=650)	0.9	4.6657	TCGA-CS-6186-01
GBMLGG(N=650)	0.48	4.7603	TCGA-DU-7008-01
GBMLGG(N=650)	1.24	4.5361	TCGA-HT-7688-01
GBMLGG(N=650)	0.3	4.4196	TCGA-DU-A7T8-01
GBMLGG(N=650)	0.5	3.6335	TCGA-DU-A6S3-01
GBMLGG(N=650)	0.18	4.481	TCGA-DB-A64U-01
GBMLGG(N=650)	0.74	4.4823	TCGA-HT-A61C-01
GBMLGG(N=650)	1.18	4.5736	TCGA-12-0821-01
GBMLGG(N=650)	0.36	4.1474	TCGA-TQ-A7RF-01
GBMLGG(N=650)	0.84	4.7913	TCGA-19-2619-01
GBMLGG(N=650)	0.38	4.9041	TCGA-F6-A8O3-01
GBMLGG(N=650)	0.38	4.2803	TCGA-R8-A6ML-01
GBMLGG(N=650)	0.84	4.3349	TCGA-DU-A5TT-01
GBMLGG(N=650)	0.34	4.3031	TCGA-QH-A870-01
GBMLGG(N=650)	0.32	4.0064	TCGA-DB-A75O-01
GBMLGG(N=650)	0.24	4.6416	TCGA-HT-8111-01
GBMLGG(N=650)	1.02	4.5342	TCGA-S9-A7QZ-01
GBMLGG(N=650)	0.94	4.8997	TCGA-12-0619-01
GBMLGG(N=650)	0.28	4.208	TCGA-DB-5273-01
GBMLGG(N=650)	0.72	4.4926	TCGA-HT-7470-01
GBMLGG(N=650)	0.58	4.0331	TCGA-FG-A4MY-01
GBMLGG(N=650)	0.28	4.6838	TCGA-HT-8108-01
GBMLGG(N=650)	0.44	4.6651	TCGA-DB-A4XE-01
GBMLGG(N=650)	0.6	3.551	TCGA-HT-A4DS-01
GBMLGG(N=650)	0.62	4.7132	TCGA-DU-8158-01
GBMLGG(N=650)	0.32	4.4357	TCGA-HT-7474-01
GBMLGG(N=650)	0.52	4.1523	TCGA-DH-5143-01
GBMLGG(N=650)	0.68	4.4317	TCGA-TQ-A7RJ-01
GBMLGG(N=650)	0.66	3.9012	TCGA-S9-A7QY-01
GBMLGG(N=650)	0.22	4.0627	TCGA-DB-A4XA-01
GBMLGG(N=650)	0.84	3.506	TCGA-28-5213-01
GBMLGG(N=650)	0.42	4.0653	TCGA-P5-A731-01
GBMLGG(N=650)	1.12	4.9416	TCGA-E1-A7YE-01
GBMLGG(N=650)	0.56	4.3126	TCGA-FG-A710-01
GBMLGG(N=650)	0.22	3.7919	TCGA-HT-8010-01
GBMLGG(N=650)	0.4	4.4476	TCGA-DU-7299-01
GBMLGG(N=650)	0.34	4.4463	TCGA-DB-5270-01
GBMLGG(N=650)	1.08	5.0299	TCGA-14-0789-01
GBMLGG(N=650)	0.16	4.2766	TCGA-KT-A74X-01
GBMLGG(N=650)	0.6	4.433	TCGA-DB-A75L-01
GBMLGG(N=650)	0.34	4.4357	TCGA-HT-A616-01
GBMLGG(N=650)	0.56	3.7971	TCGA-HT-A74K-01
GBMLGG(N=650)	0.56	4.178	TCGA-WY-A85C-01
GBMLGG(N=650)	0.46	4.4595	TCGA-FG-8188-01
GBMLGG(N=650)	0.44	4.7777	TCGA-DU-A6S7-01
GBMLGG(N=650)	0.34	4.6218	TCGA-DU-7294-01
GBMLGG(N=650)	0.66	2.7139	TCGA-DB-5274-01
GBMLGG(N=650)	1.5	4.7971	TCGA-28-5209-01
GBMLGG(N=650)	0.72	4.7756	TCGA-HT-7604-01
GBMLGG(N=650)	0.36	4.131	TCGA-TM-A84F-01
GBMLGG(N=650)	0.34	4.2381	TCGA-DB-A64O-01
GBMLGG(N=650)	0.62	4.4263	TCGA-HT-7884-01
GBMLGG(N=650)	0.18	4.2943	TCGA-S9-A6WE-01
GBMLGG(N=650)	0.3	4.1915	TCGA-QH-A6CY-01
GBMLGG(N=650)	1.06	4.6866	TCGA-S9-A6WM-01
GBMLGG(N=650)	0.32	4.7231	TCGA-28-5218-01
GBMLGG(N=650)	0.72	4.9607	TCGA-HT-A5RA-01
GBMLGG(N=650)	0.82	4.3576	TCGA-QH-A6CV-01
GBMLGG(N=650)	0.2	4.3263	TCGA-VM-A8CE-01
GBMLGG(N=650)	1.18	4.5336	TCGA-DU-5852-01
GBMLGG(N=650)	0.94	4.073	TCGA-P5-A72U-01
GBMLGG(N=650)	0.88	4.7464	TCGA-28-2514-01
GBMLGG(N=650)	0.78	4.0627	TCGA-06-5859-01
GBMLGG(N=650)	0.58	4.3834	TCGA-DB-A75K-01
GBMLGG(N=650)	0.66	4.4397	TCGA-DU-6410-01
GBMLGG(N=650)	0.88	4.5632	TCGA-28-2509-01
GBMLGG(N=650)	0.56	4.2072	TCGA-QH-A65Z-01
GBMLGG(N=650)	0.92	4.4906	TCGA-14-1825-01
GBMLGG(N=650)	0.52	3.8729	TCGA-S9-A7IY-01
GBMLGG(N=650)	0.26	4.0019	TCGA-P5-A781-01
GBMLGG(N=650)	0.52	5.0536	TCGA-TM-A84G-01
GBMLGG(N=650)	0.68	4.3667	TCGA-HW-A5KK-01
GBMLGG(N=650)	0.3	4.6577	TCGA-E1-5311-01
GBMLGG(N=650)	0.3	4.9055	TCGA-FG-7634-01
GBMLGG(N=650)	0.7	4.0653	TCGA-DU-5855-01
GBMLGG(N=650)	0.66	4.7377	TCGA-DU-6396-01
GBMLGG(N=650)	0.82	4.2601	TCGA-19-4065-01
GBMLGG(N=650)	0.82	4.2743	TCGA-FG-7643-01
GBMLGG(N=650)	0.28	4.5392	TCGA-TM-A84C-01
GBMLGG(N=650)	1	4.2304	TCGA-02-2485-01
GBMLGG(N=650)	1.04	4.1684	TCGA-WY-A85E-01
GBMLGG(N=650)	1.04	3.1908	TCGA-12-1597-01
GBMLGG(N=650)	0.84	4.656	TCGA-28-1747-01
GBMLGG(N=650)	0.52	4.1595	TCGA-28-2499-01
GBMLGG(N=650)	0.62	4.6474	TCGA-DU-7298-01
GBMLGG(N=650)	0.42	4.0575	TCGA-TM-A84T-01
GBMLGG(N=650)	0.52	4.3082	TCGA-FG-7637-01
GBMLGG(N=650)	0.56	4.2892	TCGA-HT-A5R9-01
GBMLGG(N=650)	0.56	4.5142	TCGA-HT-A614-01
GBMLGG(N=650)	1.48	4.2009	TCGA-06-0649-01
GBMLGG(N=650)	0.56	4.1153	TCGA-QH-A65R-01
GBMLGG(N=650)	0.66	4.4142	TCGA-FG-A60J-01
GBMLGG(N=650)	0.08	4.8319	TCGA-FG-8189-01
GBMLGG(N=650)	0.04	3.7105	TCGA-P5-A5EY-01
GBMLGG(N=650)	1	5.109	TCGA-06-2564-01
GBMLGG(N=650)	0.72	4.7415	TCGA-06-5408-01
GBMLGG(N=650)	0.6	3.6827	TCGA-27-1832-01
GBMLGG(N=650)	0.72	2.2082	TCGA-14-1829-01
GBMLGG(N=650)	0.54	4.6747	TCGA-32-2615-01
GBMLGG(N=650)	0.84	4.8284	TCGA-06-0158-01
GBMLGG(N=650)	0.76	4.9769	TCGA-HT-7882-01
GBMLGG(N=650)	1.28	4.6335	TCGA-06-2558-01
GBMLGG(N=650)	0.92	4.309	TCGA-HT-8011-01
GBMLGG(N=650)	0.5	4.8125	TCGA-DU-6394-01
GBMLGG(N=650)	0.72	4.178	TCGA-28-5216-01
GBMLGG(N=650)	0.5	4.5466	TCGA-WY-A859-01
GBMLGG(N=650)	0.22	4.6189	TCGA-WY-A85B-01
GBMLGG(N=650)	0.42	4.6101	TCGA-S9-A6UB-01
GBMLGG(N=650)	0.78	4.735	TCGA-28-5207-01
GBMLGG(N=650)	0.6	4.3793	TCGA-S9-A6U6-01
GBMLGG(N=650)	0.82	5.0317	TCGA-DU-8168-01
GBMLGG(N=650)	0.8	3.8501	TCGA-41-2572-01
GBMLGG(N=650)	0.54	5.1946	TCGA-06-0130-01
GBMLGG(N=650)	0.6	4.6977	TCGA-DU-7290-01
GBMLGG(N=650)	204.9	3.6125	TCGA-06-5416-01
GBMLGG(N=650)	0.66	3.4804	TCGA-06-0168-01
GBMLGG(N=650)	0.36	4.4958	TCGA-DU-6407-01
GBMLGG(N=650)	0.92	4.3406	TCGA-02-0055-01
GBMLGG(N=650)	0.38	4.8038	TCGA-HT-7601-01
GBMLGG(N=650)	0.98	4.735	TCGA-DU-6403-01
GBMLGG(N=650)	0.86	4.1466	TCGA-06-5415-01
GBMLGG(N=650)	0.28	4.7121	TCGA-DB-A64R-01
GBMLGG(N=650)	0.58	4.6938	TCGA-E1-A7YQ-01
GBMLGG(N=650)	0.94	4.9402	TCGA-DU-6405-01
GBMLGG(N=650)	0.3	4.1986	TCGA-HW-7487-01
GBMLGG(N=650)	0.68	4.2033	TCGA-S9-A7R2-01
GBMLGG(N=650)	0.38	4.6	TCGA-S9-A7J1-01
GBMLGG(N=650)	0.18	4.2419	TCGA-P5-A72X-01
GBMLGG(N=650)	0.62	4.7496	TCGA-E1-A7YJ-01
GBMLGG(N=650)	0.48	4.1236	TCGA-06-5411-01
GBMLGG(N=650)	0.74	4.4562	TCGA-26-5139-01
GBMLGG(N=650)	0.42	4.783	TCGA-HT-7690-01
GBMLGG(N=650)	0.64	4.4751	TCGA-HT-8105-01
GBMLGG(N=650)	1.32	4.2862	TCGA-76-4928-01
GBMLGG(N=650)	0.9	4.6702	TCGA-06-0644-01
GBMLGG(N=650)	0.14	4.6236	TCGA-E1-A7YY-01
GBMLGG(N=650)	0.88	4.6288	TCGA-HT-A619-01
GBMLGG(N=650)	0.8	4.3786	TCGA-DU-6400-01
GBMLGG(N=650)	0.36	3.705	TCGA-P5-A737-01
GBMLGG(N=650)	0.94	4.0091	TCGA-14-0871-01
GBMLGG(N=650)	0.64	4.3349	TCGA-RY-A83Y-01
GBMLGG(N=650)	8.14	4.906	TCGA-HT-8564-01
GBMLGG(N=650)	0.32	4.5596	TCGA-HT-7686-01
GBMLGG(N=650)	0.68	4.1571	TCGA-E1-A7YM-01
GBMLGG(N=650)	0.32	4.001	TCGA-DH-A66F-01
GBMLGG(N=650)	0.74	4.5053	TCGA-CS-5390-01
GBMLGG(N=650)	0.68	5.0657	TCGA-S9-A6UA-01
GBMLGG(N=650)	1.54	4.4081	TCGA-32-2632-01
GBMLGG(N=650)	0.46	4.9113	TCGA-FG-A87N-01
GBMLGG(N=650)	0.58	3.9838	TCGA-VV-A829-01
GBMLGG(N=650)	0.74	4.4615	TCGA-DH-A66B-01
GBMLGG(N=650)	0.44	4.306	TCGA-HT-A5R7-01
GBMLGG(N=650)	0.46	4.677	TCGA-CS-5394-01
GBMLGG(N=650)	0.8	4.7861	TCGA-DH-A66D-01
GBMLGG(N=650)	0.26	4.3653	TCGA-HT-7877-01
GBMLGG(N=650)	0.58	4.7187	TCGA-06-0882-01
GBMLGG(N=650)	0.44	4.8435	TCGA-DU-6542-01
GBMLGG(N=650)	0.32	4.3421	TCGA-QH-A6CS-01
GBMLGG(N=650)	0.42	4.2335	TCGA-E1-A7YU-01
GBMLGG(N=650)	0.46	4.2899	TCGA-W9-A837-01
GBMLGG(N=650)	0.72	4.5274	TCGA-IK-7675-01
GBMLGG(N=650)	1	4.1384	TCGA-DU-7306-01
GBMLGG(N=650)	0.8	4.5559	TCGA-QH-A6X9-01
GBMLGG(N=650)	0.66	4.9132	TCGA-S9-A6U0-01
GBMLGG(N=650)	0.52	4.7209	TCGA-HT-7611-01
GBMLGG(N=650)	0.34	4.1547	TCGA-S9-A6TY-01
GBMLGG(N=650)	0.58	4.1716	TCGA-DU-A7TB-01
GBMLGG(N=650)	0.98	4.1285	TCGA-19-2625-01
GBMLGG(N=650)	0.9	4.2526	TCGA-IK-8125-01
GBMLGG(N=650)	0.68	3.6405	TCGA-WH-A86K-01
GBMLGG(N=650)	0.42	3.7226	TCGA-DH-5141-01
GBMLGG(N=650)	0.44	3.7061	TCGA-FG-A60L-01
GBMLGG(N=650)	0.36	4.859	TCGA-DB-5280-01
GBMLGG(N=650)	0.52	4.373	TCGA-S9-A7IX-01
GBMLGG(N=650)	0.24	4.4542	TCGA-32-1980-01
GBMLGG(N=650)	0.7	4.6012	TCGA-FG-5965-01
GBMLGG(N=650)	0.02	5.2048	TCGA-P5-A5F6-01
GBMLGG(N=650)	0.8	4.5964	TCGA-27-1834-01
GBMLGG(N=650)	0.66	5.2107	TCGA-DU-7007-01
GBMLGG(N=650)	0.68	3.9992	TCGA-HW-7490-01
GBMLGG(N=650)	0.6	4.5675	TCGA-CS-6188-01
GBMLGG(N=650)	0.34	4.8944	TCGA-CS-6668-01
GBMLGG(N=650)	1.16	5.3615	TCGA-DU-8165-01
GBMLGG(N=650)	0.4	3.3076	TCGA-HT-7692-01
GBMLGG(N=650)	1.2	4.7077	TCGA-TQ-A7RM-01
GBMLGG(N=650)	0.7	5.1231	TCGA-DU-8161-01
GBMLGG(N=650)	0.56	3.9308	TCGA-P5-A736-01
GBMLGG(N=650)	0.42	4.1547	TCGA-DU-6401-01
GBMLGG(N=650)	0.86	3.8095	TCGA-HT-A74H-01
GBMLGG(N=650)	0.76	3.7836	TCGA-41-2571-01
GBMLGG(N=650)	0.4	4.5236	TCGA-TQ-A7RV-01
GBMLGG(N=650)	0.52	4.7005	TCGA-14-0781-01
GBMLGG(N=650)	0.22	4.4868	TCGA-HT-7483-01
GBMLGG(N=650)	0.3	3.9421	TCGA-HT-7620-01
GBMLGG(N=650)	0.44	4.7735	TCGA-HT-7480-01
GBMLGG(N=650)	0.86	4.439	TCGA-06-0157-01
GBMLGG(N=650)	0.74	4.9379	TCGA-S9-A7J0-01
GBMLGG(N=650)	0.52	4.6623	TCGA-12-3653-01
GBMLGG(N=650)	0.5	4.8987	TCGA-TM-A84Q-01
GBMLGG(N=650)	1.02	4.7318	TCGA-76-4926-01
GBMLGG(N=650)	0.58	4.4932	TCGA-26-5133-01
GBMLGG(N=650)	1.08	4.7851	TCGA-06-2562-01
GBMLGG(N=650)	0.28	3.9534	TCGA-RY-A847-01
GBMLGG(N=650)	0.44	4.4377	TCGA-TQ-A7RQ-01
GBMLGG(N=650)	0.7	4.8729	TCGA-TQ-A7RW-01
GBMLGG(N=650)	0.36	3.863	TCGA-FG-8191-01
GBMLGG(N=650)	0.34	4.5711	TCGA-E1-A7YW-01
GBMLGG(N=650)	0.12	4.6944	TCGA-DB-5278-01
GBMLGG(N=650)	0.96	4.8817	TCGA-E1-A7YS-01
GBMLGG(N=650)	0.26	4.4108	TCGA-HT-7695-01
GBMLGG(N=650)	0.9	4.4641	TCGA-DU-7012-01
GBMLGG(N=650)	0.26	4.6977	TCGA-HT-7879-01
GBMLGG(N=650)	0.42	3.9232	TCGA-DU-A7TC-01
GBMLGG(N=650)	0.98	3.87	TCGA-27-2521-01
GBMLGG(N=650)	0.02	4.0619	TCGA-HT-7680-01
GBMLGG(N=650)	0.44	4.504	TCGA-DB-A4X9-01
GBMLGG(N=650)	0.54	4.7154	TCGA-TQ-A7RI-01
GBMLGG(N=650)	0.62	4.3177	TCGA-TM-A7CA-01
GBMLGG(N=650)	0.36	4.5053	TCGA-QH-A86X-01
GBMLGG(N=650)	0.72	4.3917	TCGA-DU-A76R-01
GBMLGG(N=650)	0.58	4.6218	TCGA-DH-5144-01
GBMLGG(N=650)	1.38	3.4156	TCGA-41-5651-01
GBMLGG(N=650)	0.54	4.5711	TCGA-E1-A7Z2-01
GBMLGG(N=650)	0.54	4.3292	TCGA-DU-A5TP-01
GBMLGG(N=650)	1.02	4.4417	TCGA-06-0210-01
GBMLGG(N=650)	0.26	3.8228	TCGA-FG-8187-01
GBMLGG(N=650)	0.6	4.9002	TCGA-E1-5304-01
GBMLGG(N=650)	0.42	4.468	TCGA-CS-4943-01
GBMLGG(N=650)	0.74	4.8202	TCGA-19-5960-01
GBMLGG(N=650)	1.02	4.1327	TCGA-06-0686-01
GBMLGG(N=650)	0.4	4.7725	TCGA-DH-5140-01
GBMLGG(N=650)	0.66	4.1252	TCGA-TM-A7CF-01
GBMLGG(N=650)	0.6	4.232	TCGA-DH-A7US-01
GBMLGG(N=650)	0.66	4.3039	TCGA-HT-A61B-01
GBMLGG(N=650)	0.3	4.2892	TCGA-E1-A7Z6-01
GBMLGG(N=650)	0.26	4.8525	TCGA-HT-7857-01
GBMLGG(N=650)	0.66	4.0985	TCGA-E1-5319-01
GBMLGG(N=650)	0.66	3.4477	TCGA-DU-A5TS-01
GBMLGG(N=650)	192.7	5.0709	TCGA-DU-6392-01
GBMLGG(N=650)	0.3	3.4477	TCGA-QH-A6CU-01
GBMLGG(N=650)	0.2	4.9232	TCGA-DU-6404-01
GBMLGG(N=650)	0.8	3.47	TCGA-VW-A8FI-01
GBMLGG(N=650)	0.24	4.6171	TCGA-HT-A74L-01
GBMLGG(N=650)	0.44	4.6776	TCGA-P5-A5EU-01
GBMLGG(N=650)	0.68	3.492	TCGA-P5-A5EZ-01
GBMLGG(N=650)	1.12	4.0636	TCGA-S9-A89Z-01
GBMLGG(N=650)	0.48	4.6921	TCGA-S9-A6TZ-01
GBMLGG(N=650)	0.54	4.6177	TCGA-FG-5963-01
GBMLGG(N=650)	0.14	4.2914	TCGA-HT-A61A-01
GBMLGG(N=650)	0.78	4.6195	TCGA-S9-A89V-01
GBMLGG(N=650)	0.72	4.5832	TCGA-DB-A64W-01
GBMLGG(N=650)	0.46	2.8681	TCGA-FG-A4MX-01
GBMLGG(N=650)	0.5	4.9915	TCGA-P5-A72Z-01
GBMLGG(N=650)	0.36	4.8699	TCGA-HT-8114-01
GBMLGG(N=650)	1.18	4.7005	TCGA-06-2563-01
GBMLGG(N=650)	0.76	2.2452	TCGA-32-4213-01
GBMLGG(N=650)	0.18	4.3855	TCGA-HT-7881-01
GBMLGG(N=650)	1.2	4.4061	TCGA-15-0742-01
GBMLGG(N=650)	0.36	3.4183	TCGA-CS-4944-01
GBMLGG(N=650)	0.8	4.7704	TCGA-06-0187-01
GBMLGG(N=650)	1.7	4.9887	TCGA-19-1390-01
GBMLGG(N=650)	0.46	3.9654	TCGA-S9-A7QX-01
GBMLGG(N=650)	0.2	4.0549	TCGA-DU-A7TG-01
GBMLGG(N=650)	0.7	4.7022	TCGA-DU-5874-01
GBMLGG(N=650)	0.66	4.5047	TCGA-TQ-A8XE-01
GBMLGG(N=650)	0.82	4.3299	TCGA-DU-7300-01
GBMLGG(N=650)	0.62	4.3896	TCGA-HT-7694-01
GBMLGG(N=650)	0.24	4.926	TCGA-HT-7471-01
GBMLGG(N=650)	0.58	4.6077	TCGA-DB-A4XD-01
GBMLGG(N=650)	0.44	4.4074	TCGA-TQ-A7RK-01
GBMLGG(N=650)	0.86	4.1523	TCGA-HT-7475-01
GBMLGG(N=650)	0.3	4.8934	TCGA-TQ-A7RO-01
GBMLGG(N=650)	0.48	4.6247	TCGA-HT-7902-01
GBMLGG(N=650)	0.66	4.3463	TCGA-FG-A711-01
GBMLGG(N=650)	0.68	4.4874	TCGA-06-2557-01
GBMLGG(N=650)	0.28	4.5091	TCGA-DB-5276-01
GBMLGG(N=650)	0.42	3.7741	TCGA-P5-A730-01
GBMLGG(N=650)	0.92	4.8213	TCGA-E1-A7YD-01
GBMLGG(N=650)	0.38	3.9874	TCGA-HT-A74O-01
GBMLGG(N=650)	0.04	4.511	TCGA-HT-8015-01
GBMLGG(N=650)	0.42	4.9769	TCGA-HT-A74J-01
GBMLGG(N=650)	0.64	4.8655	TCGA-06-0878-01
GBMLGG(N=650)	0.98	4.2427	TCGA-DH-A669-01
GBMLGG(N=650)	0.66	4.7929	TCGA-06-0129-01
GBMLGG(N=650)	0.34	4.3256	TCGA-HT-A617-01
GBMLGG(N=650)	1.2	4.9336	TCGA-16-1045-01
GBMLGG(N=650)	0.86	4.4364	TCGA-06-2567-01
GBMLGG(N=650)	18.58	4.7088	TCGA-32-2616-01
GBMLGG(N=650)	0.5	4.1636	TCGA-HT-7605-01
GBMLGG(N=650)	0.54	4.5946	TCGA-S9-A6WO-01
GBMLGG(N=650)	1.02	4.1962	TCGA-28-5208-01
GBMLGG(N=650)	1.2	5.4313	TCGA-06-1804-01
GBMLGG(N=650)	0.58	3.867	TCGA-QH-A6CX-01
GBMLGG(N=650)	1.18	2.8955	TCGA-14-2554-01
GBMLGG(N=650)	0.58	4.2624	TCGA-P5-A5F4-01
GBMLGG(N=650)	0.88	4.2266	TCGA-DU-A76K-01
GBMLGG(N=650)	0.12	4.3744	TCGA-VM-A8CH-01
GBMLGG(N=650)	0.44	4.2541	TCGA-HT-7609-01
GBMLGG(N=650)	1	4.166	TCGA-27-2528-01
GBMLGG(N=650)	0.38	4.4047	TCGA-QH-A6X4-01
GBMLGG(N=650)	0.56	4.2676	TCGA-DH-A7UV-01
GBMLGG(N=650)	1.12	3.8729	TCGA-TM-A7C3-01
GBMLGG(N=650)	0.32	4.3342	TCGA-S9-A6WG-01
GBMLGG(N=650)	3.04	4.8958	TCGA-06-5858-01
GBMLGG(N=650)	0.54	4.3827	TCGA-FG-6690-01
GBMLGG(N=650)	0.9	3.9337	TCGA-DU-8167-01
GBMLGG(N=650)	0.46	4.222	TCGA-QH-A65X-01
GBMLGG(N=650)	0.7	3.8471	TCGA-P5-A780-01
GBMLGG(N=650)	0.56	4.641	TCGA-E1-5302-01
GBMLGG(N=650)	1.08	3.1637	TCGA-14-1823-01
GBMLGG(N=650)	0.62	2.9618	TCGA-HW-A5KJ-01
GBMLGG(N=650)	0.58	4.3356	TCGA-R8-A6MO-01
GBMLGG(N=650)	0.74	4.1466	TCGA-FG-7636-01
GBMLGG(N=650)	0.34	4.1539	TCGA-CS-6290-01
GBMLGG(N=650)	0.66	4.2862	TCGA-DU-5847-01
GBMLGG(N=650)	0.14	5.1339	TCGA-DU-6406-01
GBMLGG(N=650)	1.54	3.9571	TCGA-06-0743-01
GBMLGG(N=650)	0.5	4.9524	TCGA-TM-A84B-01
LGG(N=501)	0.18	4.5349	TCGA-S9-A7J2-01
LGG(N=501)	0.8	4.7426	TCGA-E1-A7YI-01
LGG(N=501)	0.7	4.7016	TCGA-DU-7302-01
LGG(N=501)	0.4	4.2533	TCGA-P5-A5EX-01
LGG(N=501)	0.42	5.3045	TCGA-HT-8563-01
LGG(N=501)	0.4	4.4874	TCGA-FG-A60K-01
LGG(N=501)	0.6	5.1526	TCGA-CS-5397-01
LGG(N=501)	0.4	4.5862	TCGA-E1-5322-01
LGG(N=501)	0.08	4.2995	TCGA-HT-8558-01
LGG(N=501)	0.44	4.4732	TCGA-S9-A6U8-01
LGG(N=501)	0.38	4.5305	TCGA-HT-7854-01
LGG(N=501)	0.52	4.1716	TCGA-HT-7467-01
LGG(N=501)	0.48	4.2373	TCGA-HT-7874-01
LGG(N=501)	0.66	4.6759	TCGA-S9-A6TV-01
LGG(N=501)	0.36	4.2987	TCGA-VM-A8CD-01
LGG(N=501)	0.74	4.4938	TCGA-HT-7616-01
LGG(N=501)	0.7	4.691	TCGA-KT-A7W1-01
LGG(N=501)	0.54	4.3442	TCGA-P5-A5F2-01
LGG(N=501)	0.48	4.2025	TCGA-HT-7607-01
LGG(N=501)	0.46	4.9612	TCGA-HT-7873-01
LGG(N=501)	0.42	4.0541	TCGA-HT-7603-01
LGG(N=501)	0.5	4.197	TCGA-DB-A64P-01
LGG(N=501)	0.16	4.1939	TCGA-HW-7486-01
LGG(N=501)	0.32	4.284	TCGA-P5-A5F1-01
LGG(N=501)	0.34	3.8401	TCGA-DU-7011-01
LGG(N=501)	0.54	3.7961	TCGA-P5-A77X-01
LGG(N=501)	0.46	3.8759	TCGA-VM-A8CA-01
LGG(N=501)	0.64	4.4183	TCGA-DU-7015-01
LGG(N=501)	0.5	4.0153	TCGA-TM-A7C5-01
LGG(N=501)	0.4	4.565	TCGA-DU-8162-01
LGG(N=501)	0.5	4.2995	TCGA-TM-A84O-01
LGG(N=501)	0.54	4.1409	TCGA-S9-A7R3-01
LGG(N=501)	0.44	4.5021	TCGA-TQ-A7RN-01
LGG(N=501)	0.22	4.281	TCGA-DU-A6S6-01
LGG(N=501)	0.48	4.4437	TCGA-P5-A735-01
LGG(N=501)	0.08	4.2064	TCGA-HT-7691-01
LGG(N=501)	0.32	3.4384	TCGA-FG-A6J1-01
LGG(N=501)	0.42	5.0308	TCGA-S9-A7R7-01
LGG(N=501)	0.74	4.8465	TCGA-DU-6402-01
LGG(N=501)	0.6	3.2885	TCGA-HT-7684-01
LGG(N=501)	1	4.8954	TCGA-HT-8104-01
LGG(N=501)	0.36	4.4615	TCGA-FN-7833-01
LGG(N=501)	0.34	4.7592	TCGA-HT-7473-01
LGG(N=501)	0.46	4.8324	TCGA-TQ-A7RU-01
LGG(N=501)	0.52	4.306	TCGA-DB-A4XF-01
LGG(N=501)	0.42	4.4304	TCGA-FG-A713-01
LGG(N=501)	0.86	4.2556	TCGA-E1-A7YL-01
LGG(N=501)	0.52	4.964	TCGA-CS-5396-01
LGG(N=501)	0.48	4.783	TCGA-HW-8322-01
LGG(N=501)	0.34	4.0943	TCGA-S9-A6U9-01
LGG(N=501)	0.24	4.1466	TCGA-HT-7676-01
LGG(N=501)	0.58	4.7793	TCGA-HT-7469-01
LGG(N=501)	0.52	4.4938	TCGA-HT-7478-01
LGG(N=501)	0.76	4.497	TCGA-DU-A5TW-01
LGG(N=501)	0.6	3.945	TCGA-S9-A6TX-01
LGG(N=501)	0.86	3.981	TCGA-RY-A83Z-01
LGG(N=501)	0.88	3.5022	TCGA-FG-A6IZ-01
LGG(N=501)	0.88	4.7997	TCGA-CS-4941-01
LGG(N=501)	0.32	3.9874	TCGA-DH-A7UT-01
LGG(N=501)	0.48	4.3053	TCGA-DU-5871-01
LGG(N=501)	0.54	4.327	TCGA-HW-8321-01
LGG(N=501)	0.42	4.9915	TCGA-EZ-7264-01
LGG(N=501)	0.66	4.4713	TCGA-CS-6666-01
LGG(N=501)	0.26	4.8074	TCGA-HW-7491-01
LGG(N=501)	0.3	4.7533	TCGA-S9-A6U1-01
LGG(N=501)	1.04	4.551	TCGA-E1-5307-01
LGG(N=501)	0.64	4.7751	TCGA-DU-A76L-01
LGG(N=501)	0.3	4.3292	TCGA-HW-7495-01
LGG(N=501)	0	4.0295	TCGA-CS-6669-01
LGG(N=501)	0.54	4.1756	TCGA-HT-7481-01
LGG(N=501)	0.26	4.7426	TCGA-DU-8163-01
LGG(N=501)	7.14	4.8763	TCGA-HT-8110-01
LGG(N=501)	0.24	4.0653	TCGA-RY-A840-01
LGG(N=501)	0.1	3.837	TCGA-VM-A8C9-01
LGG(N=501)	0.5	4.9246	TCGA-HW-8319-01
LGG(N=501)	0.74	4.7523	TCGA-QH-A6CW-01
LGG(N=501)	0.22	4.8017	TCGA-DU-5870-01
LGG(N=501)	0.28	3.9515	TCGA-TM-A84S-01
LGG(N=501)	0.48	4.673	TCGA-RY-A845-01
LGG(N=501)	0.48	4.918	TCGA-FG-8182-01
LGG(N=501)	1.06	4.2181	TCGA-FG-6688-01
LGG(N=501)	0.8	4.6462	TCGA-TQ-A7RP-01
LGG(N=501)	0.36	4.1859	TCGA-HT-8113-01
LGG(N=501)	0.74	4.5748	TCGA-HT-7689-01
LGG(N=501)	0.28	3.8044	TCGA-FG-7638-01
LGG(N=501)	0.64	4.6323	TCGA-DU-7013-01
LGG(N=501)	0.28	4.5199	TCGA-E1-A7Z3-01
LGG(N=501)	0.4	3.8054	TCGA-HT-7476-01
LGG(N=501)	0.48	4.511	TCGA-TQ-A7RG-01
LGG(N=501)	2.04	4.2212	TCGA-DU-A7T6-01
LGG(N=501)	0.38	4.728	TCGA-DB-A4XC-01
LGG(N=501)	1.1	4.1636	TCGA-FG-A4MW-01
LGG(N=501)	0.54	4.3681	TCGA-DH-5142-01
LGG(N=501)	0.44	4.7038	TCGA-S9-A6U2-01
LGG(N=501)	0.68	4.3855	TCGA-TQ-A7RH-01
LGG(N=501)	0.46	4.4476	TCGA-DB-A75M-01
LGG(N=501)	0.4	4.4758	TCGA-HT-8012-01
LGG(N=501)	0.56	4.5374	TCGA-S9-A7QW-01
LGG(N=501)	0.56	3.47	TCGA-P5-A733-01
LGG(N=501)	0.32	4.178	TCGA-E1-A7Z4-01
LGG(N=501)	0.7	3.8177	TCGA-DU-A5TR-01
LGG(N=501)	0.58	4.1449	TCGA-FG-8185-01
LGG(N=501)	0.46	4.7318	TCGA-HW-8320-01
LGG(N=501)	0.46	4.0162	TCGA-CS-6667-01
LGG(N=501)	0.56	4.4115	TCGA-DU-5849-01
LGG(N=501)	0.7	4.2684	TCGA-DB-5279-01
LGG(N=501)	0.58	4.0506	TCGA-CS-6670-01
LGG(N=501)	0.5	3.8033	TCGA-DB-A64V-01
LGG(N=501)	0.8	4.5497	TCGA-DU-5854-01
LGG(N=501)	1.06	4.3772	TCGA-DH-A7UR-01
LGG(N=501)	0.98	4.5361	TCGA-S9-A6WL-01
LGG(N=501)	0.12	4.0943	TCGA-HT-7880-01
LGG(N=501)	0.68	4.2396	TCGA-E1-5318-01
LGG(N=501)	0.48	4.8445	TCGA-DU-6393-01
LGG(N=501)	0.38	4.2728	TCGA-DU-5853-01
LGG(N=501)	0.64	4.5952	TCGA-TM-A84J-01
LGG(N=501)	0.68	4.4686	TCGA-FG-5962-01
LGG(N=501)	0.48	4.3548	TCGA-F6-A8O4-01
LGG(N=501)	0.34	3.8218	TCGA-S9-A7R1-01
LGG(N=501)	0.54	4.756	TCGA-TM-A84M-01
LGG(N=501)	0.02	4.3999	TCGA-HT-8107-01
LGG(N=501)	0.36	4.3119	TCGA-P5-A5ET-01
LGG(N=501)	0.72	3.9801	TCGA-P5-A72W-01
LGG(N=501)	0.3	4.3242	TCGA-FG-A70Y-01
LGG(N=501)	0.1	4.4061	TCGA-TM-A84R-01
LGG(N=501)	0.34	4.565	TCGA-HW-A5KM-01
LGG(N=501)	0.84	4.8415	TCGA-HT-7477-01
LGG(N=501)	1.06	4.3406	TCGA-FG-A87Q-01
LGG(N=501)	1	4.3814	TCGA-FG-A70Z-01
LGG(N=501)	1.02	4.673	TCGA-FG-A4MU-01
LGG(N=501)	0.5	5.2262	TCGA-DB-A4XB-01
LGG(N=501)	0.64	4.3827	TCGA-WY-A85D-01
LGG(N=501)	0.46	4.3349	TCGA-FG-7641-01
LGG(N=501)	0.48	3.9728	TCGA-DU-5872-01
LGG(N=501)	0.36	4.131	TCGA-FG-6689-01
LGG(N=501)	0.7	4.6502	TCGA-DB-5277-01
LGG(N=501)	0.64	4.5466	TCGA-HT-A615-01
LGG(N=501)	0.5	4.5398	TCGA-DU-7301-01
LGG(N=501)	0.28	4.5657	TCGA-P5-A5EW-01
LGG(N=501)	0.3	4.1796	TCGA-HT-A5RB-01
LGG(N=501)	1.08	4.7751	TCGA-E1-A7YN-01
LGG(N=501)	0.82	4.3869	TCGA-QH-A6XC-01
LGG(N=501)	0.62	4.9336	TCGA-S9-A6WN-01
LGG(N=501)	1.38	4.2921	TCGA-DB-A64L-01
LGG(N=501)	0.6	4.8812	TCGA-TM-A84I-01
LGG(N=501)	0.56	4.2965	TCGA-QH-A6CZ-01
LGG(N=501)	0.58	3.794	TCGA-WY-A858-01
LGG(N=501)	0.44	4.3031	TCGA-VM-A8CB-01
LGG(N=501)	0.64	3.5694	TCGA-VM-A8CF-01
LGG(N=501)	0.36	3.7367	TCGA-HT-7608-01
LGG(N=501)	0.28	4.1482	TCGA-CS-4938-01
LGG(N=501)	0.48	3.8905	TCGA-QH-A6X5-01
LGG(N=501)	0.48	4.84	TCGA-DU-8166-01
LGG(N=501)	0.36	4.8694	TCGA-HT-8018-01
LGG(N=501)	0.7	4.63	TCGA-DU-7292-01
LGG(N=501)	0.28	4.0322	TCGA-S9-A6TU-01
LGG(N=501)	0.06	3.9478	TCGA-DB-A75P-01
LGG(N=501)	0.22	5.0409	TCGA-FG-6691-01
LGG(N=501)	0.84	4.7597	TCGA-DU-6399-01
LGG(N=501)	0.3	4.4033	TCGA-S9-A7IQ-01
LGG(N=501)	0.4	3.9204	TCGA-S9-A6WI-01
LGG(N=501)	0.18	4.2987	TCGA-DB-A64S-01
LGG(N=501)	1.2	4.2204	TCGA-FG-6692-01
LGG(N=501)	0.34	4.2358	TCGA-HW-7489-01
LGG(N=501)	0.18	4.656	TCGA-R8-A6YH-01
LGG(N=501)	0.4	4.4938	TCGA-HT-A618-01
LGG(N=501)	0.34	3.9829	TCGA-QH-A65S-01
LGG(N=501)	0.48	4.2899	TCGA-DU-7019-01
LGG(N=501)	0.68	4.9007	TCGA-DU-A7TJ-01
LGG(N=501)	0.74	4.5255	TCGA-TM-A84H-01
LGG(N=501)	0.5	4.2877	TCGA-S9-A7R8-01
LGG(N=501)	0.42	4.2624	TCGA-S9-A7R4-01
LGG(N=501)	0.46	4.641	TCGA-S9-A7J3-01
LGG(N=501)	0.36	4.3292	TCGA-TM-A84L-01
LGG(N=501)	0.44	4.3632	TCGA-E1-A7YH-01
LGG(N=501)	1.46	4.5261	TCGA-P5-A5EV-01
LGG(N=501)	0.68	5.0553	TCGA-DU-A7TD-01
LGG(N=501)	0.4	4.0046	TCGA-HW-A5KL-01
LGG(N=501)	0.26	4.3834	TCGA-RY-A83X-01
LGG(N=501)	0.7	4.9031	TCGA-HT-7687-01
LGG(N=501)	0.2	4.2009	TCGA-WY-A85A-01
LGG(N=501)	0.92	4.8385	TCGA-DB-5281-01
LGG(N=501)	0.92	4.421	TCGA-E1-A7YK-01
LGG(N=501)	0.72	4.2427	TCGA-DU-A5TU-01
LGG(N=501)	0.64	4.5802	TCGA-DU-A7TA-01
LGG(N=501)	0.74	4.862	TCGA-CS-5395-01
LGG(N=501)	0.44	4.5349	TCGA-TQ-A7RR-01
LGG(N=501)	0.44	4.1595	TCGA-HT-A5R5-01
LGG(N=501)	0.42	3.83	TCGA-QH-A65V-01
LGG(N=501)	0.64	4.3046	TCGA-S9-A6WP-01
LGG(N=501)	0.32	4.0532	TCGA-S9-A6U5-01
LGG(N=501)	0.62	4.6854	TCGA-E1-A7YO-01
LGG(N=501)	0.44	4.8625	TCGA-QH-A6X8-01
LGG(N=501)	0.28	4.7285	TCGA-HT-7610-01
LGG(N=501)	0.54	4.5687	TCGA-HT-7875-01
LGG(N=501)	0.44	3.8269	TCGA-R8-A6MK-01
LGG(N=501)	0.52	4.481	TCGA-P5-A5F0-01
LGG(N=501)	0.52	4.287	TCGA-R8-A73M-01
LGG(N=501)	1.12	4.4243	TCGA-S9-A6TS-01
LGG(N=501)	0.52	3.74	TCGA-S9-A6TW-01
LGG(N=501)	0.52	3.9002	TCGA-E1-5303-01
LGG(N=501)	0.46	4.4549	TCGA-HT-7606-01
LGG(N=501)	0.3	4.4634	TCGA-DU-6408-01
LGG(N=501)	0.66	4.1946	TCGA-FG-5964-01
LGG(N=501)	0.36	4.5754	TCGA-DB-A64Q-01
LGG(N=501)	0.48	4.481	TCGA-S9-A7IZ-01
LGG(N=501)	1.22	4.096	TCGA-S9-A6WH-01
LGG(N=501)	0.24	3.866	TCGA-HT-7602-01
LGG(N=501)	0.9	4.3335	TCGA-DU-A6S8-01
LGG(N=501)	0.34	4.3972	TCGA-HT-7858-01
LGG(N=501)	1.2	5.0747	TCGA-HT-7860-01
LGG(N=501)	1.04	5.2025	TCGA-DU-7006-01
LGG(N=501)	0.3	4.3321	TCGA-TQ-A7RS-01
LGG(N=501)	0.34	4.3119	TCGA-DU-7009-01
LGG(N=501)	1.62	4.8405	TCGA-DU-7010-01
LGG(N=501)	0.4	4.2892	TCGA-QH-A6X3-01
LGG(N=501)	0.6	4.9575	TCGA-DU-8164-01
LGG(N=501)	0.6	3.9737	TCGA-DU-7018-01
LGG(N=501)	0.3	4.3744	TCGA-RY-A843-01
LGG(N=501)	0.56	4.6571	TCGA-HT-7693-01
LGG(N=501)	1.12	3.3047	TCGA-FG-A6J3-01
LGG(N=501)	0.52	5.2419	TCGA-HT-8106-01
LGG(N=501)	0.28	4.6445	TCGA-HT-7472-01
LGG(N=501)	0.6	4.2556	TCGA-HT-7855-01
LGG(N=501)	0.34	4.8545	TCGA-DB-A4XG-01
LGG(N=501)	0.84	4.6702	TCGA-HT-A5RC-01
LGG(N=501)	0.64	4.5318	TCGA-VM-A8C8-01
LGG(N=501)	0.22	4.4061	TCGA-HT-7681-01
LGG(N=501)	0.28	4.2684	TCGA-DU-A6S2-01
LGG(N=501)	0.6	4.0739	TCGA-DU-7309-01
LGG(N=501)	0.66	3.6219	TCGA-DB-A4XH-01
LGG(N=501)	0.26	4.3855	TCGA-HT-7485-01
LGG(N=501)	0.6	4.4162	TCGA-VW-A7QS-01
LGG(N=501)	0.22	4.1466	TCGA-VV-A86M-01
LGG(N=501)	0.68	4.322	TCGA-E1-A7YV-01
LGG(N=501)	0.26	4.8778	TCGA-HT-7468-01
LGG(N=501)	0.64	4.958	TCGA-HT-7677-01
LGG(N=501)	0.82	4.2616	TCGA-DU-A5TY-01
LGG(N=501)	0.62	4.2495	TCGA-HT-8109-01
LGG(N=501)	0.46	3.97	TCGA-HT-7479-01
LGG(N=501)	0.7	4.4913	TCGA-DB-5275-01
LGG(N=501)	0.62	4.2389	TCGA-TM-A7C4-01
LGG(N=501)	0.76	4.449	TCGA-DH-A7UU-01
LGG(N=501)	0.28	4.2095	TCGA-HT-A4DV-01
LGG(N=501)	0.48	4.6793	TCGA-FG-8186-01
LGG(N=501)	0.28	4.6212	TCGA-FG-A4MT-01
LGG(N=501)	0.5	4.4357	TCGA-E1-5305-01
LGG(N=501)	0.38	4.1644	TCGA-CS-5393-01
LGG(N=501)	0.36	4.0799	TCGA-DU-6395-01
LGG(N=501)	1.12	3.834	TCGA-DB-A64X-01
LGG(N=501)	0.88	4.3938	TCGA-S9-A7IS-01
LGG(N=501)	4.28	4.1668	TCGA-HT-7856-01
LGG(N=501)	0.18	4.0532	TCGA-QH-A6XA-01
LGG(N=501)	0.44	3.8944	TCGA-P5-A77W-01
LGG(N=501)	0.42	4.5485	TCGA-CS-4942-01
LGG(N=501)	0.9	4.6657	TCGA-CS-6186-01
LGG(N=501)	0.48	4.7603	TCGA-DU-7008-01
LGG(N=501)	1.24	4.5361	TCGA-HT-7688-01
LGG(N=501)	0.3	4.4196	TCGA-DU-A7T8-01
LGG(N=501)	0.5	3.6335	TCGA-DU-A6S3-01
LGG(N=501)	0.18	4.481	TCGA-DB-A64U-01
LGG(N=501)	0.74	4.4823	TCGA-HT-A61C-01
LGG(N=501)	0.36	4.1474	TCGA-TQ-A7RF-01
LGG(N=501)	0.38	4.9041	TCGA-F6-A8O3-01
LGG(N=501)	0.38	4.2803	TCGA-R8-A6ML-01
LGG(N=501)	0.84	4.3349	TCGA-DU-A5TT-01
LGG(N=501)	0.34	4.3031	TCGA-QH-A870-01
LGG(N=501)	0.32	4.0064	TCGA-DB-A75O-01
LGG(N=501)	0.24	4.6416	TCGA-HT-8111-01
LGG(N=501)	1.02	4.5342	TCGA-S9-A7QZ-01
LGG(N=501)	0.28	4.208	TCGA-DB-5273-01
LGG(N=501)	0.72	4.4926	TCGA-HT-7470-01
LGG(N=501)	0.58	4.0331	TCGA-FG-A4MY-01
LGG(N=501)	0.28	4.6838	TCGA-HT-8108-01
LGG(N=501)	0.44	4.6651	TCGA-DB-A4XE-01
LGG(N=501)	0.6	3.551	TCGA-HT-A4DS-01
LGG(N=501)	0.62	4.7132	TCGA-DU-8158-01
LGG(N=501)	0.32	4.4357	TCGA-HT-7474-01
LGG(N=501)	0.52	4.1523	TCGA-DH-5143-01
LGG(N=501)	0.68	4.4317	TCGA-TQ-A7RJ-01
LGG(N=501)	0.66	3.9012	TCGA-S9-A7QY-01
LGG(N=501)	0.22	4.0627	TCGA-DB-A4XA-01
LGG(N=501)	0.42	4.0653	TCGA-P5-A731-01
LGG(N=501)	1.12	4.9416	TCGA-E1-A7YE-01
LGG(N=501)	0.56	4.3126	TCGA-FG-A710-01
LGG(N=501)	0.22	3.7919	TCGA-HT-8010-01
LGG(N=501)	0.4	4.4476	TCGA-DU-7299-01
LGG(N=501)	0.34	4.4463	TCGA-DB-5270-01
LGG(N=501)	0.16	4.2766	TCGA-KT-A74X-01
LGG(N=501)	0.6	4.433	TCGA-DB-A75L-01
LGG(N=501)	0.34	4.4357	TCGA-HT-A616-01
LGG(N=501)	0.56	3.7971	TCGA-HT-A74K-01
LGG(N=501)	0.56	4.178	TCGA-WY-A85C-01
LGG(N=501)	0.46	4.4595	TCGA-FG-8188-01
LGG(N=501)	0.44	4.7777	TCGA-DU-A6S7-01
LGG(N=501)	0.34	4.6218	TCGA-DU-7294-01
LGG(N=501)	0.66	2.7139	TCGA-DB-5274-01
LGG(N=501)	0.72	4.7756	TCGA-HT-7604-01
LGG(N=501)	0.36	4.131	TCGA-TM-A84F-01
LGG(N=501)	0.34	4.2381	TCGA-DB-A64O-01
LGG(N=501)	0.62	4.4263	TCGA-HT-7884-01
LGG(N=501)	0.18	4.2943	TCGA-S9-A6WE-01
LGG(N=501)	0.3	4.1915	TCGA-QH-A6CY-01
LGG(N=501)	1.06	4.6866	TCGA-S9-A6WM-01
LGG(N=501)	0.72	4.9607	TCGA-HT-A5RA-01
LGG(N=501)	0.82	4.3576	TCGA-QH-A6CV-01
LGG(N=501)	0.2	4.3263	TCGA-VM-A8CE-01
LGG(N=501)	1.18	4.5336	TCGA-DU-5852-01
LGG(N=501)	0.94	4.073	TCGA-P5-A72U-01
LGG(N=501)	0.58	4.3834	TCGA-DB-A75K-01
LGG(N=501)	0.66	4.4397	TCGA-DU-6410-01
LGG(N=501)	0.56	4.2072	TCGA-QH-A65Z-01
LGG(N=501)	0.52	3.8729	TCGA-S9-A7IY-01
LGG(N=501)	0.26	4.0019	TCGA-P5-A781-01
LGG(N=501)	0.52	5.0536	TCGA-TM-A84G-01
LGG(N=501)	0.68	4.3667	TCGA-HW-A5KK-01
LGG(N=501)	0.3	4.6577	TCGA-E1-5311-01
LGG(N=501)	0.3	4.9055	TCGA-FG-7634-01
LGG(N=501)	0.7	4.0653	TCGA-DU-5855-01
LGG(N=501)	0.66	4.7377	TCGA-DU-6396-01
LGG(N=501)	0.82	4.2743	TCGA-FG-7643-01
LGG(N=501)	0.28	4.5392	TCGA-TM-A84C-01
LGG(N=501)	1.04	4.1684	TCGA-WY-A85E-01
LGG(N=501)	0.62	4.6474	TCGA-DU-7298-01
LGG(N=501)	0.42	4.0575	TCGA-TM-A84T-01
LGG(N=501)	0.52	4.3082	TCGA-FG-7637-01
LGG(N=501)	0.56	4.2892	TCGA-HT-A5R9-01
LGG(N=501)	0.56	4.5142	TCGA-HT-A614-01
LGG(N=501)	0.56	4.1153	TCGA-QH-A65R-01
LGG(N=501)	0.66	4.4142	TCGA-FG-A60J-01
LGG(N=501)	0.08	4.8319	TCGA-FG-8189-01
LGG(N=501)	0.04	3.7105	TCGA-P5-A5EY-01
LGG(N=501)	0.76	4.9769	TCGA-HT-7882-01
LGG(N=501)	0.92	4.309	TCGA-HT-8011-01
LGG(N=501)	0.5	4.8125	TCGA-DU-6394-01
LGG(N=501)	0.5	4.5466	TCGA-WY-A859-01
LGG(N=501)	0.22	4.6189	TCGA-WY-A85B-01
LGG(N=501)	0.42	4.6101	TCGA-S9-A6UB-01
LGG(N=501)	0.6	4.3793	TCGA-S9-A6U6-01
LGG(N=501)	0.82	5.0317	TCGA-DU-8168-01
LGG(N=501)	0.6	4.6977	TCGA-DU-7290-01
LGG(N=501)	0.36	4.4958	TCGA-DU-6407-01
LGG(N=501)	0.38	4.8038	TCGA-HT-7601-01
LGG(N=501)	0.98	4.735	TCGA-DU-6403-01
LGG(N=501)	0.28	4.7121	TCGA-DB-A64R-01
LGG(N=501)	0.58	4.6938	TCGA-E1-A7YQ-01
LGG(N=501)	0.94	4.9402	TCGA-DU-6405-01
LGG(N=501)	0.3	4.1986	TCGA-HW-7487-01
LGG(N=501)	0.68	4.2033	TCGA-S9-A7R2-01
LGG(N=501)	0.38	4.6	TCGA-S9-A7J1-01
LGG(N=501)	0.18	4.2419	TCGA-P5-A72X-01
LGG(N=501)	0.62	4.7496	TCGA-E1-A7YJ-01
LGG(N=501)	0.42	4.783	TCGA-HT-7690-01
LGG(N=501)	0.64	4.4751	TCGA-HT-8105-01
LGG(N=501)	0.14	4.6236	TCGA-E1-A7YY-01
LGG(N=501)	0.88	4.6288	TCGA-HT-A619-01
LGG(N=501)	0.8	4.3786	TCGA-DU-6400-01
LGG(N=501)	0.36	3.705	TCGA-P5-A737-01
LGG(N=501)	0.64	4.3349	TCGA-RY-A83Y-01
LGG(N=501)	8.14	4.906	TCGA-HT-8564-01
LGG(N=501)	0.32	4.5596	TCGA-HT-7686-01
LGG(N=501)	0.68	4.1571	TCGA-E1-A7YM-01
LGG(N=501)	0.32	4.001	TCGA-DH-A66F-01
LGG(N=501)	0.74	4.5053	TCGA-CS-5390-01
LGG(N=501)	0.68	5.0657	TCGA-S9-A6UA-01
LGG(N=501)	0.46	4.9113	TCGA-FG-A87N-01
LGG(N=501)	0.58	3.9838	TCGA-VV-A829-01
LGG(N=501)	0.74	4.4615	TCGA-DH-A66B-01
LGG(N=501)	0.44	4.306	TCGA-HT-A5R7-01
LGG(N=501)	0.46	4.677	TCGA-CS-5394-01
LGG(N=501)	0.8	4.7861	TCGA-DH-A66D-01
LGG(N=501)	0.26	4.3653	TCGA-HT-7877-01
LGG(N=501)	0.44	4.8435	TCGA-DU-6542-01
LGG(N=501)	0.32	4.3421	TCGA-QH-A6CS-01
LGG(N=501)	0.42	4.2335	TCGA-E1-A7YU-01
LGG(N=501)	0.46	4.2899	TCGA-W9-A837-01
LGG(N=501)	0.72	4.5274	TCGA-IK-7675-01
LGG(N=501)	1	4.1384	TCGA-DU-7306-01
LGG(N=501)	0.8	4.5559	TCGA-QH-A6X9-01
LGG(N=501)	0.66	4.9132	TCGA-S9-A6U0-01
LGG(N=501)	0.52	4.7209	TCGA-HT-7611-01
LGG(N=501)	0.34	4.1547	TCGA-S9-A6TY-01
LGG(N=501)	0.58	4.1716	TCGA-DU-A7TB-01
LGG(N=501)	0.9	4.2526	TCGA-IK-8125-01
LGG(N=501)	0.68	3.6405	TCGA-WH-A86K-01
LGG(N=501)	0.42	3.7226	TCGA-DH-5141-01
LGG(N=501)	0.44	3.7061	TCGA-FG-A60L-01
LGG(N=501)	0.36	4.859	TCGA-DB-5280-01
LGG(N=501)	0.52	4.373	TCGA-S9-A7IX-01
LGG(N=501)	0.7	4.6012	TCGA-FG-5965-01
LGG(N=501)	0.02	5.2048	TCGA-P5-A5F6-01
LGG(N=501)	0.66	5.2107	TCGA-DU-7007-01
LGG(N=501)	0.68	3.9992	TCGA-HW-7490-01
LGG(N=501)	0.6	4.5675	TCGA-CS-6188-01
LGG(N=501)	0.34	4.8944	TCGA-CS-6668-01
LGG(N=501)	1.16	5.3615	TCGA-DU-8165-01
LGG(N=501)	0.4	3.3076	TCGA-HT-7692-01
LGG(N=501)	1.2	4.7077	TCGA-TQ-A7RM-01
LGG(N=501)	0.7	5.1231	TCGA-DU-8161-01
LGG(N=501)	0.56	3.9308	TCGA-P5-A736-01
LGG(N=501)	0.42	4.1547	TCGA-DU-6401-01
LGG(N=501)	0.86	3.8095	TCGA-HT-A74H-01
LGG(N=501)	0.4	4.5236	TCGA-TQ-A7RV-01
LGG(N=501)	0.22	4.4868	TCGA-HT-7483-01
LGG(N=501)	0.3	3.9421	TCGA-HT-7620-01
LGG(N=501)	0.44	4.7735	TCGA-HT-7480-01
LGG(N=501)	0.74	4.9379	TCGA-S9-A7J0-01
LGG(N=501)	0.5	4.8987	TCGA-TM-A84Q-01
LGG(N=501)	0.28	3.9534	TCGA-RY-A847-01
LGG(N=501)	0.44	4.4377	TCGA-TQ-A7RQ-01
LGG(N=501)	0.7	4.8729	TCGA-TQ-A7RW-01
LGG(N=501)	0.36	3.863	TCGA-FG-8191-01
LGG(N=501)	0.34	4.5711	TCGA-E1-A7YW-01
LGG(N=501)	0.12	4.6944	TCGA-DB-5278-01
LGG(N=501)	0.96	4.8817	TCGA-E1-A7YS-01
LGG(N=501)	0.26	4.4108	TCGA-HT-7695-01
LGG(N=501)	0.9	4.4641	TCGA-DU-7012-01
LGG(N=501)	0.26	4.6977	TCGA-HT-7879-01
LGG(N=501)	0.42	3.9232	TCGA-DU-A7TC-01
LGG(N=501)	0.02	4.0619	TCGA-HT-7680-01
LGG(N=501)	0.44	4.504	TCGA-DB-A4X9-01
LGG(N=501)	0.54	4.7154	TCGA-TQ-A7RI-01
LGG(N=501)	0.62	4.3177	TCGA-TM-A7CA-01
LGG(N=501)	0.36	4.5053	TCGA-QH-A86X-01
LGG(N=501)	0.72	4.3917	TCGA-DU-A76R-01
LGG(N=501)	0.58	4.6218	TCGA-DH-5144-01
LGG(N=501)	0.54	4.5711	TCGA-E1-A7Z2-01
LGG(N=501)	0.54	4.3292	TCGA-DU-A5TP-01
LGG(N=501)	0.26	3.8228	TCGA-FG-8187-01
LGG(N=501)	0.6	4.9002	TCGA-E1-5304-01
LGG(N=501)	0.42	4.468	TCGA-CS-4943-01
LGG(N=501)	0.4	4.7725	TCGA-DH-5140-01
LGG(N=501)	0.66	4.1252	TCGA-TM-A7CF-01
LGG(N=501)	0.6	4.232	TCGA-DH-A7US-01
LGG(N=501)	0.66	4.3039	TCGA-HT-A61B-01
LGG(N=501)	0.3	4.2892	TCGA-E1-A7Z6-01
LGG(N=501)	0.26	4.8525	TCGA-HT-7857-01
LGG(N=501)	0.66	4.0985	TCGA-E1-5319-01
LGG(N=501)	0.66	3.4477	TCGA-DU-A5TS-01
LGG(N=501)	192.7	5.0709	TCGA-DU-6392-01
LGG(N=501)	0.3	3.4477	TCGA-QH-A6CU-01
LGG(N=501)	0.2	4.9232	TCGA-DU-6404-01
LGG(N=501)	0.8	3.47	TCGA-VW-A8FI-01
LGG(N=501)	0.24	4.6171	TCGA-HT-A74L-01
LGG(N=501)	0.44	4.6776	TCGA-P5-A5EU-01
LGG(N=501)	0.68	3.492	TCGA-P5-A5EZ-01
LGG(N=501)	1.12	4.0636	TCGA-S9-A89Z-01
LGG(N=501)	0.48	4.6921	TCGA-S9-A6TZ-01
LGG(N=501)	0.54	4.6177	TCGA-FG-5963-01
LGG(N=501)	0.14	4.2914	TCGA-HT-A61A-01
LGG(N=501)	0.78	4.6195	TCGA-S9-A89V-01
LGG(N=501)	0.72	4.5832	TCGA-DB-A64W-01
LGG(N=501)	0.46	2.8681	TCGA-FG-A4MX-01
LGG(N=501)	0.5	4.9915	TCGA-P5-A72Z-01
LGG(N=501)	0.36	4.8699	TCGA-HT-8114-01
LGG(N=501)	0.18	4.3855	TCGA-HT-7881-01
LGG(N=501)	0.36	3.4183	TCGA-CS-4944-01
LGG(N=501)	0.46	3.9654	TCGA-S9-A7QX-01
LGG(N=501)	0.2	4.0549	TCGA-DU-A7TG-01
LGG(N=501)	0.7	4.7022	TCGA-DU-5874-01
LGG(N=501)	0.66	4.5047	TCGA-TQ-A8XE-01
LGG(N=501)	0.82	4.3299	TCGA-DU-7300-01
LGG(N=501)	0.62	4.3896	TCGA-HT-7694-01
LGG(N=501)	0.24	4.926	TCGA-HT-7471-01
LGG(N=501)	0.58	4.6077	TCGA-DB-A4XD-01
LGG(N=501)	0.44	4.4074	TCGA-TQ-A7RK-01
LGG(N=501)	0.86	4.1523	TCGA-HT-7475-01
LGG(N=501)	0.3	4.8934	TCGA-TQ-A7RO-01
LGG(N=501)	0.48	4.6247	TCGA-HT-7902-01
LGG(N=501)	0.66	4.3463	TCGA-FG-A711-01
LGG(N=501)	0.28	4.5091	TCGA-DB-5276-01
LGG(N=501)	0.42	3.7741	TCGA-P5-A730-01
LGG(N=501)	0.92	4.8213	TCGA-E1-A7YD-01
LGG(N=501)	0.38	3.9874	TCGA-HT-A74O-01
LGG(N=501)	0.04	4.511	TCGA-HT-8015-01
LGG(N=501)	0.42	4.9769	TCGA-HT-A74J-01
LGG(N=501)	0.98	4.2427	TCGA-DH-A669-01
LGG(N=501)	0.34	4.3256	TCGA-HT-A617-01
LGG(N=501)	0.5	4.1636	TCGA-HT-7605-01
LGG(N=501)	0.54	4.5946	TCGA-S9-A6WO-01
LGG(N=501)	0.58	3.867	TCGA-QH-A6CX-01
LGG(N=501)	0.58	4.2624	TCGA-P5-A5F4-01
LGG(N=501)	0.88	4.2266	TCGA-DU-A76K-01
LGG(N=501)	0.12	4.3744	TCGA-VM-A8CH-01
LGG(N=501)	0.44	4.2541	TCGA-HT-7609-01
LGG(N=501)	0.38	4.4047	TCGA-QH-A6X4-01
LGG(N=501)	0.56	4.2676	TCGA-DH-A7UV-01
LGG(N=501)	1.12	3.8729	TCGA-TM-A7C3-01
LGG(N=501)	0.32	4.3342	TCGA-S9-A6WG-01
LGG(N=501)	0.54	4.3827	TCGA-FG-6690-01
LGG(N=501)	0.9	3.9337	TCGA-DU-8167-01
LGG(N=501)	0.46	4.222	TCGA-QH-A65X-01
LGG(N=501)	0.7	3.8471	TCGA-P5-A780-01
LGG(N=501)	0.56	4.641	TCGA-E1-5302-01
LGG(N=501)	0.62	2.9618	TCGA-HW-A5KJ-01
LGG(N=501)	0.58	4.3356	TCGA-R8-A6MO-01
LGG(N=501)	0.74	4.1466	TCGA-FG-7636-01
LGG(N=501)	0.34	4.1539	TCGA-CS-6290-01
LGG(N=501)	0.66	4.2862	TCGA-DU-5847-01
LGG(N=501)	0.14	5.1339	TCGA-DU-6406-01
LGG(N=501)	0.5	4.9524	TCGA-TM-A84B-01
CESC(N=286)	0.36	4.4628	TCGA-EK-A2RE-01
CESC(N=286)	0.52	5.8795	TCGA-IR-A3L7-01
CESC(N=286)	1.06	4.5748	TCGA-Q1-A73Q-01
CESC(N=286)	1.68	2.3704	TCGA-C5-A1MF-01
CESC(N=286)	0.66	5.4013	TCGA-EX-A3L1-01
CESC(N=286)	1.36	5.4165	TCGA-JW-A5VI-01
CESC(N=286)	1.3	4.8012	TCGA-EA-A1QT-01
CESC(N=286)	4.54	4.5723	TCGA-UC-A7PG-01
CESC(N=286)	1.92	6.3216	TCGA-EA-A97N-01
CESC(N=286)	1.74	4.2773	TCGA-EA-A3QD-01
CESC(N=286)	1.08	3.7017	TCGA-C5-A1ME-01
CESC(N=286)	1.82	5.4722	TCGA-C5-A8YR-01
CESC(N=286)	3.72	4.5161	TCGA-FU-A40J-01
CESC(N=286)	2.26	4.8228	TCGA-VS-A9V5-01
CESC(N=286)	2.78	5.433	TCGA-MY-A913-01
CESC(N=286)	0.82	5.602	TCGA-VS-A8Q9-01
CESC(N=286)	1.24	5.511	TCGA-DS-A0VL-01
CESC(N=286)	1.14	4.2877	TCGA-VS-A9UU-01
CESC(N=286)	0.92	5.0858	TCGA-ZJ-AAXN-01
CESC(N=286)	7.64	5.235	TCGA-VS-A9U6-01
CESC(N=286)	3.48	3.8075	TCGA-C5-A2LX-01
CESC(N=286)	1.2	4.1094	TCGA-C5-A1M8-01
CESC(N=286)	1.12	4.8022	TCGA-C5-A7CJ-01
CESC(N=286)	1.24	5.5053	TCGA-GH-A9DA-01
CESC(N=286)	0.98	3.5875	TCGA-EA-A5O9-01
CESC(N=286)	4.22	4.9951	TCGA-Q1-A73P-01
CESC(N=286)	3.4	4.9621	TCGA-C5-A8XK-01
CESC(N=286)	0.96	5.1161	TCGA-C5-A907-01
CESC(N=286)	2.9	3.7475	TCGA-VS-A9UD-01
CESC(N=286)	0.26	3.8798	TCGA-C5-A7CM-01
CESC(N=286)	0.78	4.9007	TCGA-VS-A9V2-01
CESC(N=286)	0.74	4.9561	TCGA-VS-A94Y-01
CESC(N=286)	1.62	5.0816	TCGA-C5-A8ZZ-01
CESC(N=286)	6.54	6.0736	TCGA-VS-A9UJ-01
CESC(N=286)	1.1	3.5073	TCGA-ZJ-AAXI-01
CESC(N=286)	2.96	4.9402	TCGA-Q1-A6DT-01
CESC(N=286)	0.42	5.6789	TCGA-VS-A9UQ-01
CESC(N=286)	0.64	4.5934	TCGA-VS-A8EG-01
CESC(N=286)	1.02	5.0679	TCGA-EX-A69L-01
CESC(N=286)	23.66	5.4845	TCGA-Q1-A73O-01
CESC(N=286)	2.5	4.3702	TCGA-VS-A8QC-01
CESC(N=286)	0.96	4.9199	TCGA-EA-A5ZE-01
CESC(N=286)	1.26	4.579	TCGA-ZJ-A8QO-01
CESC(N=286)	0.9	3.4224	TCGA-JX-A5QV-01
CESC(N=286)	1.28	4.1764	TCGA-EK-A2GZ-01
CESC(N=286)	0.96	4.0287	TCGA-EK-A2R9-01
CESC(N=286)	6.66	3.1327	TCGA-IR-A3LL-01
CESC(N=286)	1.2	4.248	TCGA-C5-A1M5-01
CESC(N=286)	0.98	4.2404	TCGA-C5-A7X8-01
CESC(N=286)	12.84	5.1132	TCGA-EA-A3HS-01
CESC(N=286)	13.36	4.7033	TCGA-IR-A3LH-01
CESC(N=286)	0.86	5.0631	TCGA-C5-A1M9-01
CESC(N=286)	1.42	1.2147	TCGA-DG-A2KJ-01
CESC(N=286)	1.12	3.5187	TCGA-Q1-A5R3-01
CESC(N=286)	1.4	4.7919	TCGA-HG-A2PA-01
CESC(N=286)	2.9	4.9079	TCGA-VS-A9V3-01
CESC(N=286)	3.44	4.843	TCGA-VS-A9UH-01
CESC(N=286)	0.96	4.8141	TCGA-JX-A3PZ-01
CESC(N=286)	0.8	3.9356	TCGA-C5-A1MP-01
CESC(N=286)	1.04	5.1081	TCGA-MU-A5YI-01
CESC(N=286)	2.92	5.193	TCGA-VS-A8QA-01
CESC(N=286)	1.68	5.3313	TCGA-FU-A5XV-01
CESC(N=286)	0.8	3.7846	TCGA-EX-A8YF-01
CESC(N=286)	2.22	5.4793	TCGA-ZJ-A8QR-01
CESC(N=286)	0.96	3.7783	TCGA-IR-A3LB-01
CESC(N=286)	1.5	4.0549	TCGA-EK-A2PI-01
CESC(N=286)	0.92	4.4784	TCGA-HM-A6W2-01
CESC(N=286)	2	4.6832	TCGA-IR-A3LF-01
CESC(N=286)	2	4.734	TCGA-VS-A8QF-01
CESC(N=286)	1.64	5.2608	TCGA-VS-AA62-01
CESC(N=286)	3	3.5596	TCGA-C5-A7UE-01
CESC(N=286)	1.7	4.2442	TCGA-DS-A5RQ-01
CESC(N=286)	1.22	4.2227	TCGA-BI-A20A-01
CESC(N=286)	18.68	4.1019	TCGA-EA-A3HU-01
CESC(N=286)	1.48	5.5814	TCGA-EK-A2RM-01
CESC(N=286)	5.66	5.281	TCGA-DG-A2KK-01
CESC(N=286)	0.96	5.9284	TCGA-C5-A1MI-01
CESC(N=286)	1.7	2.9507	TCGA-JW-A852-01
CESC(N=286)	3.72	4.2526	TCGA-EK-A2RA-01
CESC(N=286)	1.94	4.1335	TCGA-EK-A2RB-01
CESC(N=286)	1.58	4.6972	TCGA-C5-A1MJ-01
CESC(N=286)	1.28	4.6247	TCGA-C5-A1BE-01
CESC(N=286)	2.74	5.0108	TCGA-ZJ-AAXT-01
CESC(N=286)	2.82	3.3492	TCGA-LP-A7HU-01
CESC(N=286)	196.12	4.7929	TCGA-2W-A8YY-01
CESC(N=286)	1.08	5.6144	TCGA-EA-A411-01
CESC(N=286)	2.68	5.7963	TCGA-C5-A1MN-01
CESC(N=286)	1.12	5.2335	TCGA-C5-A2M2-01
CESC(N=286)	0.44	4.2056	TCGA-EK-A2PK-01
CESC(N=286)	27.84	3.981	TCGA-EA-A410-01
CESC(N=286)	2.02	5.4236	TCGA-VS-A952-01
CESC(N=286)	2.16	3.8591	TCGA-EK-A2IP-01
CESC(N=286)	9.44	4.0969	TCGA-EK-A2PG-01
CESC(N=286)	1.4	4.3786	TCGA-FU-A3YQ-01
CESC(N=286)	23.8	3.3979	TCGA-DS-A1OB-01
CESC(N=286)	4.38	4.9556	TCGA-VS-A959-01
CESC(N=286)	2.4	4.5485	TCGA-EK-A2R7-01
CESC(N=286)	3.76	5.0068	TCGA-JW-A5VJ-01
CESC(N=286)	3.96	4.7033	TCGA-C5-A7UH-01
CESC(N=286)	2.92	5.1942	TCGA-MA-AA3Z-01
CESC(N=286)	1.74	4.3876	TCGA-VS-A9UR-01
CESC(N=286)	1	4.5374	TCGA-EK-A3GN-01
CESC(N=286)	0.68	2.5011	TCGA-DS-A3LQ-01
CESC(N=286)	6.48	4.9454	TCGA-ZJ-AAXU-01
CESC(N=286)	2	4.4887	TCGA-VS-A9UY-01
CESC(N=286)	1.08	5.7263	TCGA-ZJ-AAXA-01
CESC(N=286)	2.4	4.3068	TCGA-EK-A2RO-01
CESC(N=286)	5.04	5.0045	TCGA-DS-A0VM-01
CESC(N=286)	0.78	5.1098	TCGA-EX-A1H5-01
CESC(N=286)	0.92	3.0944	TCGA-FU-A3EO-01
CESC(N=286)	4	3.6474	TCGA-EK-A2RK-01
CESC(N=286)	3.84	4.5898	TCGA-C5-A1BL-01
CESC(N=286)	0.38	4.2921	TCGA-Q1-A73S-01
CESC(N=286)	2.42	5.2754	TCGA-PN-A8MA-01
CESC(N=286)	0.82	3.9204	TCGA-DS-A7WF-01
CESC(N=286)	1.3	4.9824	TCGA-C5-A7X3-01
CESC(N=286)	0.98	4.4732	TCGA-HM-A3JK-01
CESC(N=286)	1.6	3.1572	TCGA-ZJ-AAXJ-01
CESC(N=286)	2.66	5.014	TCGA-VS-A9V1-01
CESC(N=286)	37.44	4.2204	TCGA-FU-A3HZ-01
CESC(N=286)	1.06	3.7367	TCGA-EA-A78R-01
CESC(N=286)	0.7	5.22	TCGA-JW-A5VG-01
CESC(N=286)	1.42	4.5826	TCGA-VS-A9UV-01
CESC(N=286)	0.08	4.9978	TCGA-C5-A8YT-01
CESC(N=286)	1.02	5.1065	TCGA-ZX-AA5X-01
CESC(N=286)	13.28	4.0497	TCGA-VS-A958-01
CESC(N=286)	5.64	4.3456	TCGA-VS-A8EL-01
CESC(N=286)	1.86	4.6035	TCGA-ZJ-AB0I-01
CESC(N=286)	1.78	5.2114	TCGA-VS-A950-01
CESC(N=286)	22.44	5.0717	TCGA-IR-A3LK-01
CESC(N=286)	17.38	5.6879	TCGA-DS-A1OC-01
CESC(N=286)	1.22	4.5454	TCGA-MA-AA3W-01
CESC(N=286)	2.14	4.7372	TCGA-VS-A9UL-01
CESC(N=286)	0.9	3.7762	TCGA-VS-A9UO-01
CESC(N=286)	4.98	5.4867	TCGA-C5-A8XJ-01
CESC(N=286)	2.08	4.5723	TCGA-C5-A7CL-01
CESC(N=286)	1.88	5.195	TCGA-FU-A3NI-01
CESC(N=286)	1.78	4.9575	TCGA-EA-A439-01
CESC(N=286)	0.88	4.8405	TCGA-VS-A9V0-01
CESC(N=286)	21.02	5.0023	TCGA-EK-A3GK-01
CESC(N=286)	1.08	4.4364	TCGA-C5-A7CG-01
CESC(N=286)	2	4.3917	TCGA-C5-A1BI-01
CESC(N=286)	1.2	5.7522	TCGA-HM-A3JJ-01
CESC(N=286)	2	3.0376	TCGA-C5-A7UI-01
CESC(N=286)	1.48	5.7326	TCGA-ZJ-AAXD-01
CESC(N=286)	5.06	4.347	TCGA-EK-A2R8-01
CESC(N=286)	3.26	5.3681	TCGA-VS-A9UP-01
CESC(N=286)	1.24	4.402	TCGA-C5-A1BF-01
CESC(N=286)	0.9	3.6382	TCGA-EX-A69M-01
CESC(N=286)	0.42	4.9524	TCGA-EA-A5ZD-01
CESC(N=286)	11.9	4.8575	TCGA-JX-A3Q0-01
CESC(N=286)	2.04	4.7214	TCGA-BI-A0VS-01
CESC(N=286)	2.64	3.9487	TCGA-VS-A8EJ-01
CESC(N=286)	1.2	5.3975	TCGA-DR-A0ZL-01
CESC(N=286)	8.46	4.4951	TCGA-MA-AA41-01
CESC(N=286)	1.58	5.5311	TCGA-EA-A3HQ-01
CESC(N=286)	3.72	3.3321	TCGA-LP-A5U2-01
CESC(N=286)	3.32	4.9069	TCGA-EA-A43B-01
CESC(N=286)	6.12	3.6759	TCGA-IR-A3LI-01
CESC(N=286)	2.26	4.852	TCGA-VS-A8EI-01
CESC(N=286)	2.32	3.6748	TCGA-EA-A3Y4-01
CESC(N=286)	7.02	4.3328	TCGA-UC-A7PF-01
CESC(N=286)	1.86	5.2258	TCGA-VS-A9UB-01
CESC(N=286)	1.02	5.0313	TCGA-UC-A7PI-01
CESC(N=286)	2.96	4.8141	TCGA-DG-A2KL-01
CESC(N=286)	1.8	4.8279	TCGA-JW-AAVH-01
CESC(N=286)	1.1	5.0117	TCGA-Q1-A5R1-01
CESC(N=286)	3.16	4.986	TCGA-EK-A2PL-01
CESC(N=286)	1.72	4.5522	TCGA-Q1-A6DW-01
CESC(N=286)	1.68	4.3951	TCGA-C5-A2M1-01
CESC(N=286)	1.84	4.182	TCGA-R2-A69V-01
CESC(N=286)	1.22	6.191	TCGA-EA-A5ZF-01
CESC(N=286)	2.9	5.8125	TCGA-FU-A23L-01
CESC(N=286)	7.7	4.2781	TCGA-DS-A1OA-01
CESC(N=286)	0.54	5.1048	TCGA-EK-A2H1-01
CESC(N=286)	0.78	4.2795	TCGA-LP-A4AU-01
CESC(N=286)	2.64	4.1417	TCGA-VS-A9U7-01
CESC(N=286)	0.8	4.3306	TCGA-C5-A2LS-01
CESC(N=286)	2.72	4.8202	TCGA-MA-AA3Y-01
CESC(N=286)	3.18	4.5299	TCGA-DG-A2KM-01
CESC(N=286)	0.74	4.8699	TCGA-C5-A3HF-01
CESC(N=286)	0.62	4.8763	TCGA-C5-A2LT-01
CESC(N=286)	2.92	3.7741	TCGA-C5-A1BK-01
CESC(N=286)	0.64	5.4842	TCGA-UC-A7PD-01
CESC(N=286)	2.86	5.0184	TCGA-VS-A9UZ-01
CESC(N=286)	11.84	4.944	TCGA-DS-A1OD-01
CESC(N=286)	4.7	4.4881	TCGA-C5-A8XH-01
CESC(N=286)	3.02	4.8028	TCGA-EK-A2RC-01
CESC(N=286)	1.1	4.1343	TCGA-JX-A3Q8-01
CESC(N=286)	33.68	5.3292	TCGA-JW-A5VL-01
CESC(N=286)	0.58	4.2884	TCGA-DS-A7WI-01
CESC(N=286)	6.22	3.3966	TCGA-VS-A953-01
CESC(N=286)	1.22	4.9364	TCGA-VS-A957-01
CESC(N=286)	1.36	4.5473	TCGA-JW-A5VH-01
CESC(N=286)	1.18	4.4615	TCGA-EA-A3HR-01
CESC(N=286)	1.08	4.7038	TCGA-EA-A3QE-01
CESC(N=286)	1.76	5.0365	TCGA-WL-A834-01
CESC(N=286)	1.5	4.0375	TCGA-C5-A901-01
CESC(N=286)	0.8	4.4257	TCGA-JW-A69B-01
CESC(N=286)	3.14	5.4549	TCGA-FU-A3HY-01
CESC(N=286)	2.48	5.2694	TCGA-C5-A1M6-01
CESC(N=286)	2.04	3.8431	TCGA-VS-A9V4-01
CESC(N=286)	1.36	3.29	TCGA-VS-A8Q8-01
CESC(N=286)	2.34	4.1002	TCGA-DS-A0VN-01
CESC(N=286)	1.56	4.0091	TCGA-MU-A8JM-01
CESC(N=286)	1.64	3.6184	TCGA-C5-A2LY-01
CESC(N=286)	1.76	2.6828	TCGA-FU-A23K-01
CESC(N=286)	1.1	5.5088	TCGA-EA-A6QX-01
CESC(N=286)	1.12	4.9113	TCGA-C5-A7CH-01
CESC(N=286)	2.82	3.4687	TCGA-EK-A2RN-01
CESC(N=286)	6.72	3.8571	TCGA-EK-A2RJ-01
CESC(N=286)	2.38	4.2165	TCGA-C5-A1BM-01
CESC(N=286)	0.78	4.4771	TCGA-Q1-A73R-01
CESC(N=286)	1.82	4.9002	TCGA-DS-A7WH-01
CESC(N=286)	0.98	4.6212	TCGA-ZJ-AAX4-01
CESC(N=286)	2.38	4.9045	TCGA-C5-A7CK-01
CESC(N=286)	3.68	5.6713	TCGA-VS-A8EK-01
CESC(N=286)	1.08	5.4293	TCGA-EA-A1QS-01
CESC(N=286)	1.32	4.5386	TCGA-FU-A3WB-01
CESC(N=286)	1.06	4.9346	TCGA-FU-A3TQ-01
CESC(N=286)	0.96	4.6877	TCGA-C5-A8XI-01
CESC(N=286)	1.22	4.8319	TCGA-C5-A1BN-01
CESC(N=286)	17.48	4.0696	TCGA-IR-A3LA-01
CESC(N=286)	4.84	4.6742	TCGA-VS-A94X-01
CESC(N=286)	8.84	4.6381	TCGA-MA-AA42-01
CESC(N=286)	2.94	5.1186	TCGA-C5-A8YQ-01
CESC(N=286)	1.92	4.6944	TCGA-ZJ-AB0H-01
CESC(N=286)	3.68	4.3191	TCGA-C5-A7X5-01
CESC(N=286)	1.32	5.126	TCGA-VS-A9U5-01
CESC(N=286)	1.94	4.6445	TCGA-C5-A1M7-01
CESC(N=286)	1.56	4.734	TCGA-C5-A905-01
CESC(N=286)	7.18	3.5047	TCGA-Q1-A5R2-01
CESC(N=286)	4.04	4.1044	TCGA-EK-A3GJ-01
CESC(N=286)	1.24	4.8314	TCGA-DG-A2KH-01
CESC(N=286)	1.16	5.1429	TCGA-VS-A8EB-01
CESC(N=286)	0.82	4.7645	TCGA-LP-A4AX-01
CESC(N=286)	12.98	5.4496	TCGA-VS-A94Z-01
CESC(N=286)	2.54	3.2405	TCGA-ZJ-AAXB-01
CESC(N=286)	0.88	3.8461	TCGA-C5-A1MQ-01
CESC(N=286)	1.64	3.2158	TCGA-EX-A1H6-01
CESC(N=286)	0.96	4.8846	TCGA-ZJ-AAXF-01
CESC(N=286)	1.08	5.2068	TCGA-VS-A9UM-01
CESC(N=286)	1.08	4.6491	TCGA-VS-A8EH-01
CESC(N=286)	1.98	4.3421	TCGA-BI-A0VR-01
CESC(N=286)	1.32	4.7688	TCGA-EA-A5FO-01
CESC(N=286)	20.78	2.9948	TCGA-DR-A0ZM-01
CESC(N=286)	1.26	4.281	TCGA-MA-AA43-01
CESC(N=286)	1.12	5.9286	TCGA-C5-A7UC-01
CESC(N=286)	1.12	5.6097	TCGA-C5-A7XC-01
CESC(N=286)	2.38	4.9924	TCGA-VS-A8QH-01
CESC(N=286)	0.76	5.5311	TCGA-LP-A5U3-01
CESC(N=286)	1.72	4.7307	TCGA-EA-A3HT-01
CESC(N=286)	0.8	4.2196	TCGA-IR-A3LC-01
CESC(N=286)	0.88	4.9924	TCGA-FU-A770-01
CESC(N=286)	2.24	4.1128	TCGA-VS-A8EC-01
CESC(N=286)	2.3	5.5069	TCGA-4J-AA1J-01
CESC(N=286)	7.14	2.1925	TCGA-LP-A4AV-01
CESC(N=286)	0.44	4.863	TCGA-EK-A2RL-01
CESC(N=286)	3.12	4.1392	TCGA-EK-A3GM-01
CESC(N=286)	2.92	4.0436	TCGA-VS-A9UC-01
CESC(N=286)	1.44	4.4283	TCGA-FU-A2QG-01
CESC(N=286)	5.32	3.6872	TCGA-EK-A2PM-01
CESC(N=286)	2.12	5.824	TCGA-DS-A0VK-01
CESC(N=286)	1.14	4.8851	TCGA-VS-A94W-01
CESC(N=286)	5.48	4.2773	TCGA-C5-A1MK-01
CESC(N=286)	8.34	4.8861	TCGA-C5-A1MH-01
CESC(N=286)	0.46	4.5856	TCGA-C5-A0TN-01
CESC(N=286)	2.32	4.8319	TCGA-VS-A9UI-01
CESC(N=286)	1.08	3.7518	TCGA-FU-A3TX-01
CESC(N=286)	0.6	4.9218	TCGA-Q1-A6DV-01
CESC(N=286)	1.32	4.1587	TCGA-C5-A1ML-01
CESC(N=286)	1.62	5.0777	TCGA-VS-A8QM-01
CESC(N=286)	0.68	5.2616	TCGA-RA-A741-01
CESC(N=286)	1.28	3.7846	TCGA-VS-A954-01
CESC(N=286)	1.7	5.2687	TCGA-XS-A8TJ-01
CESC(N=286)	1.88	4.8028	TCGA-LP-A4AW-01
CESC(N=286)	0.88	3.4958	TCGA-JW-A5VK-01
CESC(N=286)	3.04	4.2586	TCGA-EK-A2H0-01
CESC(N=286)	0.54	4.7312	TCGA-EX-A449-01
CESC(N=286)	4.66	4.174	TCGA-C5-A902-01
CESC(N=286)	1.02	5.0558	TCGA-MA-AA3X-01
CESC(N=286)	2.02	4.2646	TCGA-C5-A7CO-01
CESC(N=286)	1.14	4.1604	TCGA-C5-A2LV-01
CESC(N=286)	0.52	4.8064	TCGA-VS-A9UT-01
CESC(N=286)	1.26	5.1392	TCGA-ZJ-AAX8-01
CESC(N=286)	2.66	5.079	TCGA-C5-A1BJ-01
LUAD(N=509)	6.56	5.0374	TCGA-44-6778-01
LUAD(N=509)	4.66	3.9002	TCGA-05-4420-01
LUAD(N=509)	8.96	5.6823	TCGA-64-1679-01
LUAD(N=509)	3.68	4.4751	TCGA-49-6744-01
LUAD(N=509)	3.38	5.8112	TCGA-55-6982-01
LUAD(N=509)	7.54	5.2832	TCGA-NJ-A4YI-01
LUAD(N=509)	5.94	5.2396	TCGA-73-4666-01
LUAD(N=509)	7.7	5.1098	TCGA-MN-A4N1-01
LUAD(N=509)	3.96	4.7746	TCGA-55-7911-01
LUAD(N=509)	13.62	5.7068	TCGA-55-A4DG-01
LUAD(N=509)	4.96	4.7474	TCGA-L9-A5IP-01
LUAD(N=509)	3.54	5.1473	TCGA-73-4662-01
LUAD(N=509)	2.28	5.096	TCGA-55-6712-01
LUAD(N=509)	0.8	5.4916	TCGA-97-7553-01
LUAD(N=509)	20.54	5.6848	TCGA-49-AARE-01
LUAD(N=509)	0.54	4.7528	TCGA-50-8460-01
LUAD(N=509)	8.52	5.3431	TCGA-50-5933-01
LUAD(N=509)	4.78	4.8714	TCGA-44-6774-01
LUAD(N=509)	5.96	4.3834	TCGA-73-4670-01
LUAD(N=509)	0.9	4.0909	TCGA-55-A48Z-01
LUAD(N=509)	3.38	4.0383	TCGA-75-7031-01
LUAD(N=509)	3.86	5.2126	TCGA-44-A47A-01
LUAD(N=509)	12	4.5224	TCGA-05-4398-01
LUAD(N=509)	1.8	4.5528	TCGA-67-3773-01
LUAD(N=509)	18.56	4.2281	TCGA-64-5781-01
LUAD(N=509)	0.54	5.9858	TCGA-97-7552-01
LUAD(N=509)	13.9	5.1571	TCGA-49-AARN-01
LUAD(N=509)	0.68	4.7356	TCGA-44-3919-01
LUAD(N=509)	6.74	3.8621	TCGA-99-8032-01
LUAD(N=509)	3.52	4.9846	TCGA-55-8299-01
LUAD(N=509)	6.32	4.5355	TCGA-55-A491-01
LUAD(N=509)	1.56	5.0126	TCGA-50-6595-01
LUAD(N=509)	2.14	4.2041	TCGA-95-A4VP-01
LUAD(N=509)	11.84	5.5192	TCGA-55-8302-01
LUAD(N=509)	6.64	3.24602	TCGA-44-4112-01
LUAD(N=509)	4.8	4.838	TCGA-05-4430-01
LUAD(N=509)	3.94	5.2994	TCGA-75-7027-01
LUAD(N=509)	5.06	4.63775	TCGA-44-2668-01
LUAD(N=509)	17.7	4.7377	TCGA-55-8507-01
LUAD(N=509)	1.4	5.9432	TCGA-69-8254-01
LUAD(N=509)	12.58	5.9565	TCGA-78-8640-01
LUAD(N=509)	25.1	5.1065	TCGA-69-7979-01
LUAD(N=509)	0.88	6.0989	TCGA-55-7573-01
LUAD(N=509)	2	3.3717	TCGA-49-4506-01
LUAD(N=509)	2.12	4.8345	TCGA-05-4402-01
LUAD(N=509)	10.72	4.499	TCGA-44-8119-01
LUAD(N=509)	3.82	4.865	TCGA-55-7724-01
LUAD(N=509)	3.4	6.0858	TCGA-44-6776-01
LUAD(N=509)	5.32	3.741	TCGA-49-4514-01
LUAD(N=509)	3.52	5.5429	TCGA-05-4396-01
LUAD(N=509)	3.5	5.3388	TCGA-55-8204-01
LUAD(N=509)	0.14	5.4216	TCGA-L4-A4E6-01
LUAD(N=509)	0.88	5.22	TCGA-75-6205-01
LUAD(N=509)	16.24	4.4739	TCGA-62-A46O-01
LUAD(N=509)	26.1	5.0803	TCGA-78-7155-01
LUAD(N=509)	0.96	4.9002	TCGA-62-A472-01
LUAD(N=509)	4.6	4.9955	TCGA-NJ-A55R-01
LUAD(N=509)	1.42	5.4077	TCGA-62-8395-01
LUAD(N=509)	15.56	4.3709	TCGA-95-7567-01
LUAD(N=509)	1.76	4.2025	TCGA-50-5051-01
LUAD(N=509)	6.28	4.7242	TCGA-55-A48Y-01
LUAD(N=509)	6.16	5.7581	TCGA-86-A456-01
LUAD(N=509)	1.54	2.8622	TCGA-50-5068-01
LUAD(N=509)	1.86	5.4253	TCGA-NJ-A55A-01
LUAD(N=509)	1.4	5.4624	TCGA-J2-A4AG-01
LUAD(N=509)	6.28	4.9672	TCGA-05-4405-01
LUAD(N=509)	1	5.4407	TCGA-50-5944-01
LUAD(N=509)	5.28	4.7762	TCGA-86-7955-01
LUAD(N=509)	0.92	5.8468	TCGA-50-6673-01
LUAD(N=509)	4.1	5.2072	TCGA-55-7727-01
LUAD(N=509)	5.26	5.1887	TCGA-55-8510-01
LUAD(N=509)	2.06	4.0118	TCGA-MP-A4T8-01
LUAD(N=509)	8.76	6.1871	TCGA-86-8279-01
LUAD(N=509)	4.04	5.3067	TCGA-55-A494-01
LUAD(N=509)	3.72	2.93469	TCGA-44-3917-01
LUAD(N=509)	2.94	4.728	TCGA-75-5125-01
LUAD(N=509)	1.78	4.1587	TCGA-55-8615-01
LUAD(N=509)	7.12	5.658	TCGA-MP-A4TF-01
LUAD(N=509)	2.08	4.1294	TCGA-55-6979-01
LUAD(N=509)	23	3.8778	TCGA-86-A4JF-01
LUAD(N=509)	3.22	4.4067	TCGA-86-7701-01
LUAD(N=509)	1.46	5.5747	TCGA-62-8398-01
LUAD(N=509)	4.52	3.8944	TCGA-L9-A443-01
LUAD(N=509)	4.28	4.9691	TCGA-78-8660-01
LUAD(N=509)	3.9	5.2799	TCGA-78-7148-01
LUAD(N=509)	1.76	4.4088	TCGA-67-6215-01
LUAD(N=509)	22.36	4.8963	TCGA-55-A490-01
LUAD(N=509)	8.72	4.936	TCGA-69-7974-01
LUAD(N=509)	10.18	4.7367	TCGA-49-AAR4-01
LUAD(N=509)	4.66	3.8561	TCGA-05-4418-01
LUAD(N=509)	4.36	3.6054	TCGA-35-4123-01
LUAD(N=509)	6.72	3.7825	TCGA-55-6969-01
LUAD(N=509)	0.76	5.1835	TCGA-91-8497-01
LUAD(N=509)	2.08	4.4751	TCGA-62-A470-01
LUAD(N=509)	8.32	4.8817	TCGA-53-A4EZ-01
LUAD(N=509)	1.38	5.3639	TCGA-78-7162-01
LUAD(N=509)	0.68	4.7919	TCGA-62-A46Y-01
LUAD(N=509)	3.16	5.8585	TCGA-62-A46R-01
LUAD(N=509)	3.74	4.2766	TCGA-05-4244-01
LUAD(N=509)	13.32	4.691	TCGA-L9-A8F4-01
LUAD(N=509)	1.84	5.3165	TCGA-55-7726-01
LUAD(N=509)	0.68	5.0989	TCGA-49-4512-01
LUAD(N=509)	15.8	5.0246	TCGA-73-A9RS-01
LUAD(N=509)	1.28	4.5217	TCGA-MP-A4TD-01
LUAD(N=509)	0.74	4.533	TCGA-75-5147-01
LUAD(N=509)	3.9	5.6445	TCGA-44-7671-01
LUAD(N=509)	12.58	3.8411	TCGA-38-4631-01
LUAD(N=509)	2.5	5.1152	TCGA-NJ-A55O-01
LUAD(N=509)	6.42	4.4913	TCGA-75-6211-01
LUAD(N=509)	1.46	3.7182	TCGA-05-5420-01
LUAD(N=509)	2.46	4.5577	TCGA-55-1594-01
LUAD(N=509)	2.34	4.0207	TCGA-64-5774-01
LUAD(N=509)	6.48	4.916	TCGA-50-5941-01
LUAD(N=509)	2.9	5.15965	TCGA-44-2662-01
LUAD(N=509)	0.46	5.1974	TCGA-97-A4M2-01
LUAD(N=509)	10.96	5.3245	TCGA-55-7995-01
LUAD(N=509)	18.1	4.7242	TCGA-95-7043-01
LUAD(N=509)	8.76	4.7762	TCGA-NJ-A4YP-01
LUAD(N=509)	0.72	6.132	TCGA-97-A4M1-01
LUAD(N=509)	2.38	4.7682	TCGA-78-7149-01
LUAD(N=509)	4.42	5.018	TCGA-MP-A4TC-01
LUAD(N=509)	2.6	5.6139	TCGA-97-A4M5-01
LUAD(N=509)	7.84	3.8105	TCGA-99-8028-01
LUAD(N=509)	3.42	6.1297	TCGA-67-6217-01
LUAD(N=509)	0.88	5.3104	TCGA-44-A47B-01
LUAD(N=509)	2.16	4.2951	TCGA-38-4628-01
LUAD(N=509)	5.92	5.0968	TCGA-05-4250-01
LUAD(N=509)	1.62	5.4463	TCGA-67-3774-01
LUAD(N=509)	2.84	4.5154	TCGA-80-5608-01
LUAD(N=509)	3.64	4.4887	TCGA-05-4389-01
LUAD(N=509)	0.2	5.4549	TCGA-75-6203-01
LUAD(N=509)	0.92	5.7926	TCGA-55-6981-01
LUAD(N=509)	2.7	4.6988	TCGA-55-7903-01
LUAD(N=509)	2.14	4.8748	TCGA-62-8394-01
LUAD(N=509)	4.84	5.3893	TCGA-49-4488-01
LUAD(N=509)	2.56	5.2533	TCGA-78-7537-01
LUAD(N=509)	3.42	6.5475	TCGA-80-5611-01
LUAD(N=509)	4.46	4.8395	TCGA-55-6972-01
LUAD(N=509)	1.54	6.1544	TCGA-97-7941-01
LUAD(N=509)	2.1	5.8687	TCGA-91-6840-01
LUAD(N=509)	10.02	5.0379	TCGA-69-7978-01
LUAD(N=509)	18.68	4.6543	TCGA-50-5930-01
LUAD(N=509)	8.36	4.2958	TCGA-93-8067-01
LUAD(N=509)	5.24	4.4673	TCGA-44-A479-01
LUAD(N=509)	0.5	6.0372	TCGA-55-8087-01
LUAD(N=509)	0.84	5.2917	TCGA-86-6562-01
LUAD(N=509)	0.72	5.0867	TCGA-05-4425-01
LUAD(N=509)	1.04	5.6247	TCGA-MP-A4SW-01
LUAD(N=509)	0.76	6.0424	TCGA-55-8512-01
LUAD(N=509)	3.56	4.1236	TCGA-67-3770-01
LUAD(N=509)	5.02	6.9197	TCGA-50-6592-01
LUAD(N=509)	1.38	4.8978	TCGA-55-6975-01
LUAD(N=509)	1.94	5.5877	TCGA-S2-AA1A-01
LUAD(N=509)	9.28	5.3367	TCGA-55-8511-01
LUAD(N=509)	0.78	5.6227	TCGA-05-4434-01
LUAD(N=509)	9.1	4.7033	TCGA-55-8092-01
LUAD(N=509)	0.64	5.373	TCGA-L9-A50W-01
LUAD(N=509)	4.4	4.9303	TCGA-44-7661-01
LUAD(N=509)	0.82	5.4545	TCGA-05-4426-01
LUAD(N=509)	9.4	4.5085	TCGA-05-4390-01
LUAD(N=509)	2.94	4.8017	TCGA-64-5815-01
LUAD(N=509)	0.5	5.8689	TCGA-69-7761-01
LUAD(N=509)	4.8	4.3807	TCGA-55-8301-01
LUAD(N=509)	2.54	5.6496	TCGA-44-A4SU-01
LUAD(N=509)	10.18	5.0352	TCGA-69-7765-01
LUAD(N=509)	0.62	7.1384	TCGA-05-4433-01
LUAD(N=509)	3.16	4.0515	TCGA-55-8508-01
LUAD(N=509)	2	4.0488	TCGA-50-5044-01
LUAD(N=509)	2.14	5.6005	TCGA-05-4384-01
LUAD(N=509)	2.94	6.0618	TCGA-O1-A52J-01
LUAD(N=509)	13.7	5.7722	TCGA-78-7220-01
LUAD(N=509)	0.66	4.5047	TCGA-05-4422-01
LUAD(N=509)	1.58	6.2459	TCGA-44-6779-01
LUAD(N=509)	5.02	4.0462	TCGA-86-8672-01
LUAD(N=509)	1.98	4.5123	TCGA-55-6983-01
LUAD(N=509)	5.64	2.7051	TCGA-91-8499-01
LUAD(N=509)	7.28	5.0251	TCGA-91-6836-01
LUAD(N=509)	1.04	4.4628	TCGA-38-7271-01
LUAD(N=509)	2.86	4.6347	TCGA-NJ-A4YG-01
LUAD(N=509)	5.9	4.4868	TCGA-73-4658-01
LUAD(N=509)	1.02	4.3506	TCGA-86-8076-01
LUAD(N=509)	3.06	4.0251	TCGA-55-6987-01
LUAD(N=509)	3.3	4.4861	TCGA-78-7152-01
LUAD(N=509)	2.52	5.0566	TCGA-55-8096-01
LUAD(N=509)	2.1	4.9031	TCGA-75-5122-01
LUAD(N=509)	5.22	4.7192	TCGA-50-5931-01
LUAD(N=509)	10.04	4.9519	TCGA-49-AARO-01
LUAD(N=509)	2.68	5.4323	TCGA-44-2655-01
LUAD(N=509)	7.38	5.527	TCGA-73-4668-01
LUAD(N=509)	4.68	4.4243	TCGA-91-6831-01
LUAD(N=509)	9.64	4.6583	TCGA-L9-A444-01
LUAD(N=509)	9.84	4.8022	TCGA-05-5425-01
LUAD(N=509)	1.08	5.07486	TCGA-44-6775-01
LUAD(N=509)	0.5	5.5982	TCGA-75-7025-01
LUAD(N=509)	0.54	5.3527	TCGA-05-5429-01
LUAD(N=509)	7.96	5.2491	TCGA-99-7458-01
LUAD(N=509)	4.6	4.748	TCGA-97-7546-01
LUAD(N=509)	1.46	4.4357	TCGA-67-3772-01
LUAD(N=509)	4.16	4.4277	TCGA-05-4395-01
LUAD(N=509)	3.34	4.6938	TCGA-91-7771-01
LUAD(N=509)	0.38	5.9887	TCGA-55-6984-01
LUAD(N=509)	16.62	3.25565	TCGA-44-3918-01
LUAD(N=509)	1.48	5.2315	TCGA-50-8459-01
LUAD(N=509)	13.96	5.6645	TCGA-69-7980-01
LUAD(N=509)	1.32	5.5766	TCGA-50-5939-01
LUAD(N=509)	10.04	5.3227	TCGA-75-5126-01
LUAD(N=509)	9.16	4.7442	TCGA-50-6594-01
LUAD(N=509)	1.22	5.9074	TCGA-MP-A5C7-01
LUAD(N=509)	0.68	4.45508	TCGA-44-5645-01
LUAD(N=509)	1.74	5.3768	TCGA-50-5935-01
LUAD(N=509)	2.98	5.9832	TCGA-55-7914-01
LUAD(N=509)	6.4	4.5748	TCGA-55-7576-01
LUAD(N=509)	0.7	4.52051	TCGA-44-2666-01
LUAD(N=509)	0.68	6.5703	TCGA-55-7284-01
LUAD(N=509)	1.58	5.405	TCGA-73-4676-01
LUAD(N=509)	3.66	4.0419	TCGA-78-7166-01
LUAD(N=509)	4.06	5.813	TCGA-83-5908-01
LUAD(N=509)	13.86	4.1161	TCGA-50-5049-01
LUAD(N=509)	3.44	4.6428	TCGA-44-3396-01
LUAD(N=509)	4.5	5.9124	TCGA-97-8172-01
LUAD(N=509)	0.72	4.0019	TCGA-50-6597-01
LUAD(N=509)	5.04	3.7867	TCGA-69-8255-01
LUAD(N=509)	0.86	5.2939	TCGA-62-A46U-01
LUAD(N=509)	2.52	4.9561	TCGA-97-8176-01
LUAD(N=509)	19	4.6725	TCGA-86-8358-01
LUAD(N=509)	3.3	5.2646	TCGA-05-4415-01
LUAD(N=509)	7.76	4.6787	TCGA-55-7281-01
LUAD(N=509)	2.9	4.3285	TCGA-78-7161-01
LUAD(N=509)	3.38	3.3563	TCGA-49-4507-01
LUAD(N=509)	1.08	5.2211	TCGA-55-8621-01
LUAD(N=509)	2.96	4.8059	TCGA-55-6970-01
LUAD(N=509)	0.92	5.5233	TCGA-75-6207-01
LUAD(N=509)	9.64	5.3299	TCGA-55-8205-01
LUAD(N=509)	1.18	5.3252	TCGA-69-7763-01
LUAD(N=509)	5.72	4.7491	TCGA-55-7913-01
LUAD(N=509)	0.48	4.7608	TCGA-62-8397-01
LUAD(N=509)	3.64	4.9218	TCGA-73-4659-01
LUAD(N=509)	7.48	3.8441	TCGA-91-A4BC-01
LUAD(N=509)	0.98	5.2895	TCGA-97-8547-01
LUAD(N=509)	0.52	4.4881	TCGA-97-8175-01
LUAD(N=509)	0.76	5.859	TCGA-86-8075-01
LUAD(N=509)	7.62	5.0291	TCGA-55-6985-01
LUAD(N=509)	7.02	5.1514	TCGA-55-A48X-01
LUAD(N=509)	6.78	4.9331	TCGA-44-2657-01
LUAD(N=509)	7.02	4.3492	TCGA-95-7562-01
LUAD(N=509)	2.34	5.0644	TCGA-55-7725-01
LUAD(N=509)	8.08	4.2064	TCGA-69-A59K-01
LUAD(N=509)	1.86	5.5562	TCGA-05-5715-01
LUAD(N=509)	5.58	5.0242	TCGA-55-A492-01
LUAD(N=509)	3.14	5.3618	TCGA-78-7145-01
LUAD(N=509)	1.74	5.3194	TCGA-86-8278-01
LUAD(N=509)	7.7	4.8269	TCGA-MN-A4N5-01
LUAD(N=509)	8.12	3.242	TCGA-64-5778-01
LUAD(N=509)	2.54	5.7679	TCGA-J2-8194-01
LUAD(N=509)	0.72	6.4343	TCGA-55-A57B-01
LUAD(N=509)	0.52	5.1744	TCGA-38-4627-01
LUAD(N=509)	3.6	4.7898	TCGA-86-7711-01
LUAD(N=509)	2.58	4.6352	TCGA-05-5423-01
LUAD(N=509)	0.66	3.6872	TCGA-91-8496-01
LUAD(N=509)	0.8	5.6787	TCGA-86-8280-01
LUAD(N=509)	0.52	6.40666	TCGA-44-6146-01
LUAD(N=509)	5.96	5.6778	TCGA-78-7146-01
LUAD(N=509)	5.48	3.0774	TCGA-35-4122-01
LUAD(N=509)	0.16	4.6387	TCGA-78-8648-01
LUAD(N=509)	0.9	5.3338	TCGA-86-7953-01
LUAD(N=509)	2.12	4.5723	TCGA-44-5643-01
LUAD(N=509)	1.84	5.8256	TCGA-73-7498-01
LUAD(N=509)	11.7	5.8133	TCGA-75-6214-01
LUAD(N=509)	1.92	5.0255	TCGA-93-7348-01
LUAD(N=509)	2.96	5.4813	TCGA-97-8174-01
LUAD(N=509)	8.52	3.907	TCGA-55-8620-01
LUAD(N=509)	8.66	4.6651	TCGA-62-8399-01
LUAD(N=509)	2.04	5.3202	TCGA-80-5607-01
LUAD(N=509)	6.88	3.7709	TCGA-49-AAR2-01
LUAD(N=509)	0.38	5.5466	TCGA-55-6543-01
LUAD(N=509)	0.82	5.09	TCGA-49-4501-01
LUAD(N=509)	5.28	5.2865	TCGA-78-7156-01
LUAD(N=509)	2.06	5.7082	TCGA-62-A46S-01
LUAD(N=509)	12.14	3.9847	TCGA-49-AARQ-01
LUAD(N=509)	1.32	6.0919	TCGA-93-A4JN-01
LUAD(N=509)	1.12	4.3709	TCGA-91-6847-01
LUAD(N=509)	1.98	4.3177	TCGA-55-6642-01
LUAD(N=509)	7.14	4.5772	TCGA-55-8203-01
LUAD(N=509)	18.18	5.4903	TCGA-44-7670-01
LUAD(N=509)	1.66	4.4496	TCGA-MP-A4TJ-01
LUAD(N=509)	0.96	6.2983	TCGA-38-6178-01
LUAD(N=509)	1.22	5.8316	TCGA-86-8074-01
LUAD(N=509)	12.78	5.2231	TCGA-55-8616-01
LUAD(N=509)	6.64	4.4919	TCGA-97-A4M0-01
LUAD(N=509)	7.66	5.3954	TCGA-49-6767-01
LUAD(N=509)	5.42	4.8048	TCGA-55-1595-01
LUAD(N=509)	0.06	4.764	TCGA-49-AARR-01
LUAD(N=509)	0.56	5.6476	TCGA-MP-A4T9-01
LUAD(N=509)	1.64	4.74491	TCGA-44-6147-01
LUAD(N=509)	24.52	6.351	TCGA-86-8073-01
LUAD(N=509)	25.56	6.2763	TCGA-MN-A4N4-01
LUAD(N=509)	3.7	4.511	TCGA-97-A4M3-01
LUAD(N=509)	1.34	5.4016	TCGA-86-7714-01
LUAD(N=509)	6.16	3.3321	TCGA-49-4487-01
LUAD(N=509)	5.96	6.4699	TCGA-78-7542-01
LUAD(N=509)	4.46	5.2593	TCGA-95-A4VK-01
LUAD(N=509)	26.44	5.4473	TCGA-55-7994-01
LUAD(N=509)	4.48	4.7565	TCGA-49-6742-01
LUAD(N=509)	1.42	7.0205	TCGA-MP-A4T6-01
LUAD(N=509)	29.64	4.3576	TCGA-55-8506-01
LUAD(N=509)	6.22	5.0122	TCGA-MP-A4TA-01
LUAD(N=509)	0.48	4.6999	TCGA-55-8091-01
LUAD(N=509)	5.04	5.383	TCGA-91-6828-01
LUAD(N=509)	7.28	2.7826	TCGA-35-5375-01
LUAD(N=509)	5.24	5.9723	TCGA-97-A4M7-01
LUAD(N=509)	7.96	4.9251	TCGA-78-7539-01
LUAD(N=509)	1.18	6.1475	TCGA-J2-8192-01
LUAD(N=509)	2.54	5.434	TCGA-86-7713-01
LUAD(N=509)	0.62	4.9374	TCGA-67-6216-01
LUAD(N=509)	1.48	4.8207	TCGA-44-A47G-01
LUAD(N=509)	0.08	5.3184	TCGA-55-7816-01
LUAD(N=509)	5.6	5.2732	TCGA-78-7147-01
LUAD(N=509)	3.02	3.793	TCGA-44-3398-01
LUAD(N=509)	1.9	6.1687	TCGA-78-7633-01
LUAD(N=509)	0	5.7323	TCGA-86-A4P8-01
LUAD(N=509)	2.74	4.2699	TCGA-78-7535-01
LUAD(N=509)	0.52	5.2597	TCGA-86-8671-01
LUAD(N=509)	1.32	5.7279	TCGA-91-6835-01
LUAD(N=509)	2.1	4.9458	TCGA-35-3615-01
LUAD(N=509)	0.28	6.1281	TCGA-55-6980-01
LUAD(N=509)	1.92	4.4739	TCGA-50-5936-01
LUAD(N=509)	1.14	5.6445	TCGA-73-4675-01
LUAD(N=509)	1.36	6.0713	TCGA-50-5932-01
LUAD(N=509)	1.06	5.2877	TCGA-93-A4JO-01
LUAD(N=509)	2.24	4.8405	TCGA-49-AAR3-01
LUAD(N=509)	3.66	5.6868	TCGA-78-7154-01
LUAD(N=509)	5.36	4.8881	TCGA-55-7910-01
LUAD(N=509)	2.48	4.8729	TCGA-4B-A93V-01
LUAD(N=509)	1.92	5.1958	TCGA-91-6849-01
LUAD(N=509)	2.78	5.6404	TCGA-MP-A4SY-01
LUAD(N=509)	5.78	4.9969	TCGA-MP-A4SV-01
LUAD(N=509)	0.1	5.7209	TCGA-55-8513-01
LUAD(N=509)	6.7	4.9137	TCGA-MP-A4T4-01
LUAD(N=509)	1.58	6.3815	TCGA-71-8520-01
LUAD(N=509)	2.94	4.0884	TCGA-44-7672-01
LUAD(N=509)	5.24	5.3031	TCGA-50-6593-01
LUAD(N=509)	4.5	4.5015	TCGA-69-7973-01
LUAD(N=509)	17.66	4.9937	TCGA-67-3771-01
LUAD(N=509)	2.82	5.5853	TCGA-99-8033-01
LUAD(N=509)	9.48	5.5814	TCGA-91-6848-01
LUAD(N=509)	0.98	5.6297	TCGA-93-A4JP-01
LUAD(N=509)	0.22	5.4276	TCGA-38-A44F-01
LUAD(N=509)	6.02	3.867	TCGA-44-7660-01
LUAD(N=509)	1.16	4.4523	TCGA-69-7760-01
LUAD(N=509)	1.4	5.6582	TCGA-69-7764-01
LUAD(N=509)	0.52	4.50006	TCGA-44-2665-01
LUAD(N=509)	2.38	5.6279	TCGA-55-8505-01
LUAD(N=509)	3.7	4.423	TCGA-95-7944-01
LUAD(N=509)	26.24	4.7033	TCGA-L9-A7SV-01
LUAD(N=509)	20.62	6.4668	TCGA-55-8089-01
LUAD(N=509)	3.78	5.6171	TCGA-55-7283-01
LUAD(N=509)	12.76	4.2072	TCGA-44-8117-01
LUAD(N=509)	5.58	5.796	TCGA-53-7626-01
LUAD(N=509)	8.16	4.3555	TCGA-86-8673-01
LUAD(N=509)	1.54	4.347	TCGA-95-8494-01
LUAD(N=509)	0.98	4.0366	TCGA-97-8171-01
LUAD(N=509)	4.1	4.839	TCGA-50-7109-01
LUAD(N=509)	5.28	4.9865	TCGA-44-6145-01
LUAD(N=509)	4.24	4.7682	TCGA-55-8085-01
LUAD(N=509)	10.22	4.9528	TCGA-NJ-A4YF-01
LUAD(N=509)	0.52	5.1473	TCGA-NJ-A7XG-01
LUAD(N=509)	2.24	5.5283	TCGA-05-4403-01
LUAD(N=509)	1.9	6.3834	TCGA-55-8097-01
LUAD(N=509)	19	5.3078	TCGA-NJ-A4YQ-01
LUAD(N=509)	2.78	6.6411	TCGA-97-7547-01
LUAD(N=509)	7.42	4.6508	TCGA-55-5899-01
LUAD(N=509)	13.76	4.9833	TCGA-05-4397-01
LUAD(N=509)	6.3	4.8095	TCGA-44-6777-01
LUAD(N=509)	2.42	4.7496	TCGA-55-7815-01
LUAD(N=509)	3.54	5.5379	TCGA-91-6830-01
LUAD(N=509)	8.22	5.7339	TCGA-44-A4SS-01
LUAD(N=509)	2.46	5.0934	TCGA-44-7659-01
LUAD(N=509)	2.78	3.9929	TCGA-53-7813-01
LUAD(N=509)	30.36	5.1538	TCGA-05-4382-01
LUAD(N=509)	2.44	5.0374	TCGA-93-A4JQ-01
LUAD(N=509)	6.38	3.3393	TCGA-05-5428-01
LUAD(N=509)	0.36	5.3705	TCGA-55-6986-01
LUAD(N=509)	0.64	4.1764	TCGA-91-A4BD-01
LUAD(N=509)	4.52	2.2482	TCGA-50-5066-01
LUAD(N=509)	10.96	6.4658	TCGA-49-AAR9-01
LUAD(N=509)	19.6	4.9946	TCGA-55-7907-01
LUAD(N=509)	21.06	5.8245	TCGA-95-7039-01
LUAD(N=509)	0.96	4.1676	TCGA-64-1680-01
LUAD(N=509)	0.88	4.9905	TCGA-J2-A4AE-01
LUAD(N=509)	2.72	4.4324	TCGA-86-8359-01
LUAD(N=509)	3.78	6.4363	TCGA-55-8614-01
LUAD(N=509)	4.4	4.7693	TCGA-55-7574-01
LUAD(N=509)	16	3.6703	TCGA-44-5644-01
LUAD(N=509)	4.08	5.2277	TCGA-MP-A4TI-01
LUAD(N=509)	2.5	5.0313	TCGA-95-7948-01
LUAD(N=509)	4.22	5.5784	TCGA-73-4677-01
LUAD(N=509)	1.08	5.8498	TCGA-50-5942-01
LUAD(N=509)	1.56	5.5693	TCGA-78-7167-01
LUAD(N=509)	19.06	5.1031	TCGA-78-8662-01
LUAD(N=509)	9.76	4.5608	TCGA-86-8585-01
LUAD(N=509)	1.06	4.6	TCGA-50-6591-01
LUAD(N=509)	6.14	5.1835	TCGA-MP-A4TK-01
LUAD(N=509)	6.62	4.7709	TCGA-55-7570-01
LUAD(N=509)	0.36	6.3475	TCGA-78-7163-01
LUAD(N=509)	5.04	4.2563	TCGA-05-4417-01
LUAD(N=509)	1.74	5.1587	TCGA-78-8655-01
LUAD(N=509)	7.38	5.306	TCGA-97-7554-01
LUAD(N=509)	3.46	5.1152	TCGA-49-4505-01
LUAD(N=509)	3.24	4.6195	TCGA-86-8669-01
LUAD(N=509)	5.64	5.0492	TCGA-55-8208-01
LUAD(N=509)	1.5	6.9611	TCGA-75-6206-01
LUAD(N=509)	1.44	4.4047	TCGA-55-6971-01
LUAD(N=509)	18.26	5.2013	TCGA-05-4410-01
[truncated: 9,003 more rows]

## Sheet: TMB_r_value
type	r_value
GBM	-0.0759258
LGG	0.0843899
CESC	-0.00254968
LUAD	-0.0839468
COAD	0.0274924
LAML	0.0427307
BRCA	-0.00700321
ESCA	0.142629
STES	0.0304242
SARC	-0.023468
KIRP	-0.0363361
STAD	0.022882
PRAD	-0.00577803
UCEC	0.159002
HNSC	-0.092192
KIRC	0.00252022
LUSC	-0.0345229
THYM	-0.0199493
LIHC	-0.0127633
THCA	-0.0534089
MESO	-0.00774784
READ	0.0687765
PAAD	0.0636181
OV	0.071855
TGCT	0.00563147
PCPG	-0.00330828
SKCM	-0.110096
UVM	0.0571982
UCS	0.0661268
BLCA	-0.0929911
ACC	0.217412
KICH	-0.256523
CHOL	-0.439521
DLBC	-0.0259411

## Sheet: MSI
	MSI	Expression	SampleName
GBM(N=151)	0.4705	4.2173	TCGA-19-1787-01
GBM(N=151)	0.2833	4.4357	TCGA-06-5412-01
GBM(N=151)	0.2592	3.8033	TCGA-12-5299-01
GBM(N=151)	0.2816	4.9709	TCGA-06-2565-01
GBM(N=151)	0.2728	4.7565	TCGA-06-2561-01
GBM(N=151)	0.2707	3.97	TCGA-06-0132-01
GBM(N=151)	0.2804	4.5497	TCGA-19-2629-01
GBM(N=151)	0.2807	3.2267	TCGA-06-0238-01
GBM(N=151)	0.2779	3.6589	TCGA-06-0749-01
GBM(N=151)	0.2931	4.4081	TCGA-06-0174-01
GBM(N=151)	0.2903	4.3104	TCGA-06-5410-01
GBM(N=151)	0.2642	4.518	TCGA-28-2513-01
GBM(N=151)	0.2712	5.0828	TCGA-76-4929-01
GBM(N=151)	0.2765	4.3039	TCGA-06-0645-01
GBM(N=151)	0.2856	4.7581	TCGA-32-2634-01
GBM(N=151)	0.2717	4.2111	TCGA-06-0141-01
GBM(N=151)	0.2673	4.7981	TCGA-06-0125-01
GBM(N=151)	0.2846	4.1954	TCGA-26-1442-01
GBM(N=151)	0.2724	4.0523	TCGA-26-5136-01
GBM(N=151)	0.2674	5.1656	TCGA-14-1034-01
GBM(N=151)	0.2727	4.3527	TCGA-06-0184-01
GBM(N=151)	0.2635	2.9581	TCGA-12-3652-01
GBM(N=151)	0.2662	4.5565	TCGA-76-4927-01
GBM(N=151)	0.2679	4.3371	TCGA-14-0790-01
GBM(N=151)	0.26	4.3772	TCGA-26-5132-01
GBM(N=151)	0.2639	4.2389	TCGA-76-4932-01
GBM(N=151)	0.2791	4.926	TCGA-32-1970-01
GBM(N=151)	0.2722	2.3704	TCGA-06-0219-01
GBM(N=151)	0.2753	4.0471	TCGA-14-0787-01
GBM(N=151)	0.2702	3.6359	TCGA-12-0618-01
GBM(N=151)	0.2698	2.8562	TCGA-27-2524-01
GBM(N=151)	0.2734	5.2319	TCGA-08-0386-01
GBM(N=151)	0.2825	4.7714	TCGA-06-0190-01
GBM(N=151)	0.2711	4.0225	TCGA-06-0745-01
GBM(N=151)	0.2701	4.1899	TCGA-26-5135-01
GBM(N=151)	0.2781	4.1119	TCGA-41-3915-01
GBM(N=151)	0.2721	1.8957	TCGA-27-1831-01
GBM(N=151)	0.2622	4.8851	TCGA-28-1753-01
GBM(N=151)	0.2794	3.245	TCGA-12-5295-01
GBM(N=151)	0.2783	4.1571	TCGA-28-5204-01
GBM(N=151)	0.3081	5.1165	TCGA-06-2569-01
GBM(N=151)	0.2786	4.8827	TCGA-27-1830-01
GBM(N=151)	0.2742	4.6288	TCGA-06-2559-01
GBM(N=151)	0.263	4.2965	TCGA-06-0139-01
GBM(N=151)	0.2712	2.7161	TCGA-27-2526-01
GBM(N=151)	0.2914	4.4713	TCGA-06-5856-01
GBM(N=151)	0.2713	3.6635	TCGA-06-5418-01
GBM(N=151)	0.268	4.5802	TCGA-06-5414-01
GBM(N=151)	0.2709	3.9691	TCGA-06-5417-01
GBM(N=151)	0.2619	1.5854	TCGA-26-5134-01
GBM(N=151)	0.2739	5.037	TCGA-76-4925-01
GBM(N=151)	0.289	4.8028	TCGA-28-2510-01
GBM(N=151)	0.2839	4.5009	TCGA-06-5413-01
GBM(N=151)	0.2839	4.6759	TCGA-06-0646-01
GBM(N=151)	0.2745	3.832	TCGA-12-3650-01
GBM(N=151)	0.2723	3.8808	TCGA-12-0616-01
GBM(N=151)	0.2688	5.0492	TCGA-28-5215-01
GBM(N=151)	0.2739	4.4602	TCGA-19-2620-01
GBM(N=151)	0.2809	3.9608	TCGA-16-0846-01
GBM(N=151)	0.2642	4.7437	TCGA-02-0047-01
GBM(N=151)	0.2806	4.656	TCGA-19-2624-01
GBM(N=151)	0.2687	4.3604	TCGA-32-1982-01
GBM(N=151)	0.2676	4.4183	TCGA-27-1835-01
GBM(N=151)	0.2796	4.6136	TCGA-06-0747-01
GBM(N=151)	0.2655	4.061	TCGA-28-5220-01
GBM(N=151)	0.2746	3.3148	TCGA-14-0817-01
GBM(N=151)	0.2611	4.3814	TCGA-06-2570-01
GBM(N=151)	0.2857	4.6588	TCGA-41-4097-01
GBM(N=151)	0.2679	4.65909	TCGA-06-0211-01
GBM(N=151)	0.2721	4.0091	TCGA-02-2483-01
GBM(N=151)	0.2719	4.7991	TCGA-76-4931-01
GBM(N=151)	0.2726	4.6393	TCGA-27-2523-01
GBM(N=151)	0.2742	4.4562	TCGA-27-1837-01
GBM(N=151)	0.2839	3.6324	TCGA-06-0744-01
GBM(N=151)	0.2667	3.7571	TCGA-06-0750-01
GBM(N=151)	0.258	3.5149	TCGA-32-5222-01
GBM(N=151)	0.2674	4.4887	TCGA-27-2519-01
GBM(N=151)	0.2969	4.5736	TCGA-12-0821-01
GBM(N=151)	0.2909	4.7913	TCGA-19-2619-01
GBM(N=151)	0.2888	4.8997	TCGA-12-0619-01
GBM(N=151)	0.274	3.506	TCGA-28-5213-01
GBM(N=151)	0.2756	5.0299	TCGA-14-0789-01
GBM(N=151)	0.2631	4.7971	TCGA-28-5209-01
GBM(N=151)	0.2892	4.7231	TCGA-28-5218-01
GBM(N=151)	0.261	4.7464	TCGA-28-2514-01
GBM(N=151)	0.3054	4.0627	TCGA-06-5859-01
GBM(N=151)	0.2915	4.5632	TCGA-28-2509-01
GBM(N=151)	0.2743	4.4906	TCGA-14-1825-01
GBM(N=151)	0.3315	4.2601	TCGA-19-4065-01
GBM(N=151)	0.2728	4.2304	TCGA-02-2485-01
GBM(N=151)	0.279	3.1908	TCGA-12-1597-01
GBM(N=151)	0.2715	4.656	TCGA-28-1747-01
GBM(N=151)	0.2863	4.1595	TCGA-28-2499-01
GBM(N=151)	0.2803	4.2009	TCGA-06-0649-01
GBM(N=151)	0.2692	5.109	TCGA-06-2564-01
GBM(N=151)	0.2961	4.7415	TCGA-06-5408-01
GBM(N=151)	0.2741	3.6827	TCGA-27-1832-01
GBM(N=151)	0.2721	2.2082	TCGA-14-1829-01
GBM(N=151)	0.2767	4.6747	TCGA-32-2615-01
GBM(N=151)	0.2707	4.8284	TCGA-06-0158-01
GBM(N=151)	0.2652	4.6335	TCGA-06-2558-01
GBM(N=151)	0.2729	4.178	TCGA-28-5216-01
GBM(N=151)	0.2799	4.735	TCGA-28-5207-01
GBM(N=151)	0.2819	3.8501	TCGA-41-2572-01
GBM(N=151)	0.2763	5.1946	TCGA-06-0130-01
GBM(N=151)	0.2849	3.6125	TCGA-06-5416-01
GBM(N=151)	0.274	3.4804	TCGA-06-0168-01
GBM(N=151)	0.2745	4.3406	TCGA-02-0055-01
GBM(N=151)	0.2682	4.1466	TCGA-06-5415-01
GBM(N=151)	0.2943	4.1236	TCGA-06-5411-01
GBM(N=151)	0.2619	4.4562	TCGA-26-5139-01
GBM(N=151)	0.2737	4.2862	TCGA-76-4928-01
GBM(N=151)	0.2763	4.6702	TCGA-06-0644-01
GBM(N=151)	0.2899	4.0091	TCGA-14-0871-01
GBM(N=151)	0.2716	4.4081	TCGA-32-2632-01
GBM(N=151)	0.2696	4.7187	TCGA-06-0882-01
GBM(N=151)	0.2834	4.1285	TCGA-19-2625-01
GBM(N=151)	0.2972	4.4542	TCGA-32-1980-01
GBM(N=151)	0.2731	4.5964	TCGA-27-1834-01
GBM(N=151)	0.2728	3.7836	TCGA-41-2571-01
GBM(N=151)	0.2925	4.7005	TCGA-14-0781-01
GBM(N=151)	0.2759	4.439	TCGA-06-0157-01
GBM(N=151)	0.2826	4.6623	TCGA-12-3653-01
GBM(N=151)	0.2626	4.7318	TCGA-76-4926-01
GBM(N=151)	0.2808	4.4932	TCGA-26-5133-01
GBM(N=151)	0.2614	4.7851	TCGA-06-2562-01
GBM(N=151)	0.2704	3.87	TCGA-27-2521-01
GBM(N=151)	0.3173	3.4156	TCGA-41-5651-01
GBM(N=151)	0.2695	4.4417	TCGA-06-0210-01
GBM(N=151)	0.2954	4.8202	TCGA-19-5960-01
GBM(N=151)	0.2763	4.1327	TCGA-06-0686-01
GBM(N=151)	0.2704	4.7005	TCGA-06-2563-01
GBM(N=151)	0.29	4.8274	TCGA-15-1444-01
GBM(N=151)	0.2788	2.2452	TCGA-32-4213-01
GBM(N=151)	0.2727	4.4061	TCGA-15-0742-01
GBM(N=151)	0.3894	4.7704	TCGA-06-0187-01
GBM(N=151)	0.2907	4.9887	TCGA-19-1390-01
GBM(N=151)	0.2881	4.4874	TCGA-06-2557-01
GBM(N=151)	0.267	4.8655	TCGA-06-0878-01
GBM(N=151)	0.2758	4.7929	TCGA-06-0129-01
GBM(N=151)	0.2652	4.9336	TCGA-16-1045-01
GBM(N=151)	0.2749	4.4364	TCGA-06-2567-01
GBM(N=151)	0.321	4.7088	TCGA-32-2616-01
GBM(N=151)	0.2613	4.1962	TCGA-28-5208-01
GBM(N=151)	0.2911	5.4313	TCGA-06-1804-01
GBM(N=151)	0.2618	2.8955	TCGA-14-2554-01
GBM(N=151)	0.2737	4.166	TCGA-27-2528-01
GBM(N=151)	0.3491	4.8958	TCGA-06-5858-01
GBM(N=151)	0.2721	2.3077	TCGA-06-0178-01
GBM(N=151)	0.2769	3.1637	TCGA-14-1823-01
GBM(N=151)	0.2901	3.9571	TCGA-06-0743-01
GBMLGG(N=657)	0.4705	4.2173	TCGA-19-1787-01
GBMLGG(N=657)	0.3226	4.5349	TCGA-S9-A7J2-01
GBMLGG(N=657)	0.3294	4.7426	TCGA-E1-A7YI-01
GBMLGG(N=657)	0.2833	4.4357	TCGA-06-5412-01
GBMLGG(N=657)	0.3434	4.7016	TCGA-DU-7302-01
GBMLGG(N=657)	0.331	4.5205	TCGA-DU-A7TI-01
GBMLGG(N=657)	0.2592	3.8033	TCGA-12-5299-01
GBMLGG(N=657)	0.3291	4.2533	TCGA-P5-A5EX-01
GBMLGG(N=657)	0.3059	5.3045	TCGA-HT-8563-01
GBMLGG(N=657)	0.3046	4.4874	TCGA-FG-A60K-01
GBMLGG(N=657)	0.2816	4.9709	TCGA-06-2565-01
GBMLGG(N=657)	0.2728	4.7565	TCGA-06-2561-01
GBMLGG(N=657)	0.2936	5.1526	TCGA-CS-5397-01
GBMLGG(N=657)	0.2614	4.5862	TCGA-E1-5322-01
GBMLGG(N=657)	0.3126	4.2995	TCGA-HT-8558-01
GBMLGG(N=657)	0.2927	4.4732	TCGA-S9-A6U8-01
GBMLGG(N=657)	0.3046	4.5305	TCGA-HT-7854-01
GBMLGG(N=657)	0.3082	4.1716	TCGA-HT-7467-01
GBMLGG(N=657)	0.3173	4.2373	TCGA-HT-7874-01
GBMLGG(N=657)	0.3293	4.6759	TCGA-S9-A6TV-01
GBMLGG(N=657)	0.3279	4.2987	TCGA-VM-A8CD-01
GBMLGG(N=657)	0.2707	3.97	TCGA-06-0132-01
GBMLGG(N=657)	0.3365	4.4938	TCGA-HT-7616-01
GBMLGG(N=657)	0.3216	4.691	TCGA-KT-A7W1-01
GBMLGG(N=657)	0.3259	4.3442	TCGA-P5-A5F2-01
GBMLGG(N=657)	0.2804	4.5497	TCGA-19-2629-01
GBMLGG(N=657)	0.3408	4.2025	TCGA-HT-7607-01
GBMLGG(N=657)	0.2807	3.2267	TCGA-06-0238-01
GBMLGG(N=657)	0.3182	4.9612	TCGA-HT-7873-01
GBMLGG(N=657)	0.2779	3.6589	TCGA-06-0749-01
GBMLGG(N=657)	0.3088	4.0541	TCGA-HT-7603-01
GBMLGG(N=657)	0.2945	4.197	TCGA-DB-A64P-01
GBMLGG(N=657)	0.2931	4.4081	TCGA-06-0174-01
GBMLGG(N=657)	0.2981	4.1939	TCGA-HW-7486-01
GBMLGG(N=657)	0.3352	4.284	TCGA-P5-A5F1-01
GBMLGG(N=657)	0.3028	3.8401	TCGA-DU-7011-01
GBMLGG(N=657)	0.3367	3.7961	TCGA-P5-A77X-01
GBMLGG(N=657)	0.3079	4.2781	TCGA-HW-7493-01
GBMLGG(N=657)	0.3185	3.8759	TCGA-VM-A8CA-01
GBMLGG(N=657)	0.3113	4.4183	TCGA-DU-7015-01
GBMLGG(N=657)	0.3282	4.0153	TCGA-TM-A7C5-01
GBMLGG(N=657)	0.2975	4.565	TCGA-DU-8162-01
GBMLGG(N=657)	0.3239	4.2995	TCGA-TM-A84O-01
GBMLGG(N=657)	0.2903	4.3104	TCGA-06-5410-01
GBMLGG(N=657)	0.3032	4.1409	TCGA-S9-A7R3-01
GBMLGG(N=657)	0.307	4.5021	TCGA-TQ-A7RN-01
GBMLGG(N=657)	0.2642	4.518	TCGA-28-2513-01
GBMLGG(N=657)	0.331	4.281	TCGA-DU-A6S6-01
GBMLGG(N=657)	0.3327	4.4437	TCGA-P5-A735-01
GBMLGG(N=657)	0.3188	4.2064	TCGA-HT-7691-01
GBMLGG(N=657)	0.3142	3.4384	TCGA-FG-A6J1-01
GBMLGG(N=657)	0.3103	5.0308	TCGA-S9-A7R7-01
GBMLGG(N=657)	0.2712	5.0828	TCGA-76-4929-01
GBMLGG(N=657)	0.2903	4.8465	TCGA-DU-6402-01
GBMLGG(N=657)	0.3053	3.2885	TCGA-HT-7684-01
GBMLGG(N=657)	0.3196	4.8954	TCGA-HT-8104-01
GBMLGG(N=657)	0.3294	4.4615	TCGA-FN-7833-01
GBMLGG(N=657)	0.2863	4.7592	TCGA-HT-7473-01
GBMLGG(N=657)	0.2765	4.3039	TCGA-06-0645-01
GBMLGG(N=657)	0.3202	3.7237	TCGA-HT-8019-01
GBMLGG(N=657)	0.3148	4.8324	TCGA-TQ-A7RU-01
GBMLGG(N=657)	0.2994	4.306	TCGA-DB-A4XF-01
GBMLGG(N=657)	0.3232	4.4304	TCGA-FG-A713-01
GBMLGG(N=657)	0.3183	4.2556	TCGA-E1-A7YL-01
GBMLGG(N=657)	0.2798	4.964	TCGA-CS-5396-01
GBMLGG(N=657)	0.3312	4.783	TCGA-HW-8322-01
GBMLGG(N=657)	0.3187	4.0943	TCGA-S9-A6U9-01
GBMLGG(N=657)	0.3427	4.1466	TCGA-HT-7676-01
GBMLGG(N=657)	0.3254	4.7793	TCGA-HT-7469-01
GBMLGG(N=657)	0.2856	4.7581	TCGA-32-2634-01
GBMLGG(N=657)	0.3039	4.4938	TCGA-HT-7478-01
GBMLGG(N=657)	0.3286	4.497	TCGA-DU-A5TW-01
GBMLGG(N=657)	0.3238	3.945	TCGA-S9-A6TX-01
GBMLGG(N=657)	0.3219	3.981	TCGA-RY-A83Z-01
GBMLGG(N=657)	0.2717	4.2111	TCGA-06-0141-01
GBMLGG(N=657)	0.2673	4.7981	TCGA-06-0125-01
GBMLGG(N=657)	0.3011	3.5022	TCGA-FG-A6IZ-01
GBMLGG(N=657)	0.2736	4.7997	TCGA-CS-4941-01
GBMLGG(N=657)	0.3253	3.9874	TCGA-DH-A7UT-01
GBMLGG(N=657)	0.2859	4.3053	TCGA-DU-5871-01
GBMLGG(N=657)	0.3223	4.327	TCGA-HW-8321-01
GBMLGG(N=657)	0.3039	4.9915	TCGA-EZ-7264-01
GBMLGG(N=657)	0.303	4.4713	TCGA-CS-6666-01
GBMLGG(N=657)	0.3073	4.8074	TCGA-HW-7491-01
GBMLGG(N=657)	0.2989	4.7533	TCGA-S9-A6U1-01
GBMLGG(N=657)	0.3001	4.551	TCGA-E1-5307-01
GBMLGG(N=657)	0.3227	4.7751	TCGA-DU-A76L-01
GBMLGG(N=657)	0.2961	4.3292	TCGA-HW-7495-01
GBMLGG(N=657)	0.292	4.0295	TCGA-CS-6669-01
GBMLGG(N=657)	0.328	4.1756	TCGA-HT-7481-01
GBMLGG(N=657)	0.3338	4.7426	TCGA-DU-8163-01
GBMLGG(N=657)	0.2846	4.1954	TCGA-26-1442-01
GBMLGG(N=657)	0.317	4.8763	TCGA-HT-8110-01
GBMLGG(N=657)	0.3244	4.0653	TCGA-RY-A840-01
GBMLGG(N=657)	0.3188	3.837	TCGA-VM-A8C9-01
GBMLGG(N=657)	0.3108	4.9246	TCGA-HW-8319-01
GBMLGG(N=657)	0.326	4.7523	TCGA-QH-A6CW-01
GBMLGG(N=657)	0.2838	4.8017	TCGA-DU-5870-01
GBMLGG(N=657)	0.3258	3.9515	TCGA-TM-A84S-01
GBMLGG(N=657)	0.2724	4.0523	TCGA-26-5136-01
GBMLGG(N=657)	0.2674	5.1656	TCGA-14-1034-01
GBMLGG(N=657)	0.2727	4.3527	TCGA-06-0184-01
GBMLGG(N=657)	0.2635	2.9581	TCGA-12-3652-01
GBMLGG(N=657)	0.3215	4.673	TCGA-RY-A845-01
GBMLGG(N=657)	0.2662	4.5565	TCGA-76-4927-01
GBMLGG(N=657)	0.3007	4.918	TCGA-FG-8182-01
GBMLGG(N=657)	0.2679	4.3371	TCGA-14-0790-01
GBMLGG(N=657)	0.26	4.3772	TCGA-26-5132-01
GBMLGG(N=657)	0.3084	4.2181	TCGA-FG-6688-01
GBMLGG(N=657)	0.3122	4.6462	TCGA-TQ-A7RP-01
GBMLGG(N=657)	0.3363	4.1859	TCGA-HT-8113-01
GBMLGG(N=657)	0.2639	4.2389	TCGA-76-4932-01
GBMLGG(N=657)	0.3139	4.5748	TCGA-HT-7689-01
GBMLGG(N=657)	0.3535	3.8044	TCGA-FG-7638-01
GBMLGG(N=657)	0.3016	4.6323	TCGA-DU-7013-01
GBMLGG(N=657)	0.2791	4.926	TCGA-32-1970-01
GBMLGG(N=657)	0.3266	4.5199	TCGA-E1-A7Z3-01
GBMLGG(N=657)	0.3046	3.8054	TCGA-HT-7476-01
GBMLGG(N=657)	0.3074	4.511	TCGA-TQ-A7RG-01
GBMLGG(N=657)	0.3245	4.0807	TCGA-FG-8181-01
GBMLGG(N=657)	0.3107	4.2212	TCGA-DU-A7T6-01
GBMLGG(N=657)	0.3289	4.728	TCGA-DB-A4XC-01
GBMLGG(N=657)	0.3281	4.1636	TCGA-FG-A4MW-01
GBMLGG(N=657)	0.2722	2.3704	TCGA-06-0219-01
GBMLGG(N=657)	0.2682	4.3681	TCGA-DH-5142-01
GBMLGG(N=657)	0.2753	4.0471	TCGA-14-0787-01
GBMLGG(N=657)	0.3006	4.7038	TCGA-S9-A6U2-01
GBMLGG(N=657)	0.2702	3.6359	TCGA-12-0618-01
GBMLGG(N=657)	0.2698	2.8562	TCGA-27-2524-01
GBMLGG(N=657)	0.3208	4.3855	TCGA-TQ-A7RH-01
GBMLGG(N=657)	0.2734	5.2319	TCGA-08-0386-01
GBMLGG(N=657)	0.3329	4.4476	TCGA-DB-A75M-01
GBMLGG(N=657)	0.3326	4.4758	TCGA-HT-8012-01
GBMLGG(N=657)	0.3171	4.5374	TCGA-S9-A7QW-01
GBMLGG(N=657)	0.325	3.47	TCGA-P5-A733-01
GBMLGG(N=657)	0.3246	4.178	TCGA-E1-A7Z4-01
GBMLGG(N=657)	0.3103	3.8177	TCGA-DU-A5TR-01
GBMLGG(N=657)	0.3305	4.1449	TCGA-FG-8185-01
GBMLGG(N=657)	0.3379	4.7318	TCGA-HW-8320-01
GBMLGG(N=657)	0.3037	4.0162	TCGA-CS-6667-01
GBMLGG(N=657)	0.2822	4.4115	TCGA-DU-5849-01
GBMLGG(N=657)	0.2803	4.2684	TCGA-DB-5279-01
GBMLGG(N=657)	0.2825	4.7714	TCGA-06-0190-01
GBMLGG(N=657)	0.3002	4.0506	TCGA-CS-6670-01
GBMLGG(N=657)	0.3035	3.8033	TCGA-DB-A64V-01
GBMLGG(N=657)	0.2711	4.0225	TCGA-06-0745-01
GBMLGG(N=657)	0.2846	4.5497	TCGA-DU-5854-01
GBMLGG(N=657)	0.3079	4.3772	TCGA-DH-A7UR-01
GBMLGG(N=657)	0.3037	4.5361	TCGA-S9-A6WL-01
GBMLGG(N=657)	0.3401	4.0943	TCGA-HT-7880-01
GBMLGG(N=657)	0.2701	4.1899	TCGA-26-5135-01
GBMLGG(N=657)	0.267	4.2396	TCGA-E1-5318-01
GBMLGG(N=657)	0.3022	4.8445	TCGA-DU-6393-01
GBMLGG(N=657)	0.2781	4.1119	TCGA-41-3915-01
GBMLGG(N=657)	0.2998	4.2728	TCGA-DU-5853-01
GBMLGG(N=657)	0.3326	4.5952	TCGA-TM-A84J-01
GBMLGG(N=657)	0.3002	4.4686	TCGA-FG-5962-01
GBMLGG(N=657)	0.2721	1.8957	TCGA-27-1831-01
GBMLGG(N=657)	0.3305	4.3548	TCGA-F6-A8O4-01
GBMLGG(N=657)	0.2622	4.8851	TCGA-28-1753-01
GBMLGG(N=657)	0.3215	3.8218	TCGA-S9-A7R1-01
GBMLGG(N=657)	0.2794	3.245	TCGA-12-5295-01
GBMLGG(N=657)	0.3177	4.756	TCGA-TM-A84M-01
GBMLGG(N=657)	0.3127	4.3999	TCGA-HT-8107-01
GBMLGG(N=657)	0.3079	4.3119	TCGA-P5-A5ET-01
GBMLGG(N=657)	0.322	3.9801	TCGA-P5-A72W-01
GBMLGG(N=657)	0.3158	4.3242	TCGA-FG-A70Y-01
GBMLGG(N=657)	0.3172	4.4061	TCGA-TM-A84R-01
GBMLGG(N=657)	0.2977	4.565	TCGA-HW-A5KM-01
GBMLGG(N=657)	0.324	4.8415	TCGA-HT-7477-01
GBMLGG(N=657)	0.3257	4.3406	TCGA-FG-A87Q-01
GBMLGG(N=657)	0.3071	4.3814	TCGA-FG-A70Z-01
GBMLGG(N=657)	0.3113	4.673	TCGA-FG-A4MU-01
GBMLGG(N=657)	0.3091	5.2262	TCGA-DB-A4XB-01
GBMLGG(N=657)	0.3142	4.3827	TCGA-WY-A85D-01
GBMLGG(N=657)	0.3328	4.3349	TCGA-FG-7641-01
GBMLGG(N=657)	0.3001	3.9728	TCGA-DU-5872-01
GBMLGG(N=657)	0.3059	4.131	TCGA-FG-6689-01
GBMLGG(N=657)	0.2819	4.6502	TCGA-DB-5277-01
GBMLGG(N=657)	0.2783	4.1571	TCGA-28-5204-01
GBMLGG(N=657)	0.2926	4.5466	TCGA-HT-A615-01
GBMLGG(N=657)	0.3472	4.5398	TCGA-DU-7301-01
GBMLGG(N=657)	0.3161	4.5657	TCGA-P5-A5EW-01
GBMLGG(N=657)	0.3081	5.1165	TCGA-06-2569-01
GBMLGG(N=657)	0.3218	4.1796	TCGA-HT-A5RB-01
GBMLGG(N=657)	0.3204	4.7751	TCGA-E1-A7YN-01
GBMLGG(N=657)	0.2786	4.8827	TCGA-27-1830-01
GBMLGG(N=657)	0.3276	4.3869	TCGA-QH-A6XC-01
GBMLGG(N=657)	0.2742	4.6288	TCGA-06-2559-01
GBMLGG(N=657)	0.306	4.9336	TCGA-S9-A6WN-01
GBMLGG(N=657)	0.263	4.2965	TCGA-06-0139-01
GBMLGG(N=657)	0.298	4.2921	TCGA-DB-A64L-01
GBMLGG(N=657)	0.3189	4.8812	TCGA-TM-A84I-01
GBMLGG(N=657)	0.3324	4.2965	TCGA-QH-A6CZ-01
GBMLGG(N=657)	0.3216	3.794	TCGA-WY-A858-01
GBMLGG(N=657)	0.3204	4.3031	TCGA-VM-A8CB-01
GBMLGG(N=657)	0.2712	2.7161	TCGA-27-2526-01
GBMLGG(N=657)	0.3315	3.5694	TCGA-VM-A8CF-01
GBMLGG(N=657)	0.2914	4.4713	TCGA-06-5856-01
GBMLGG(N=657)	0.3413	3.7367	TCGA-HT-7608-01
GBMLGG(N=657)	0.303	4.1482	TCGA-CS-4938-01
GBMLGG(N=657)	0.3222	3.8905	TCGA-QH-A6X5-01
GBMLGG(N=657)	0.317	4.84	TCGA-DU-8166-01
GBMLGG(N=657)	0.3227	4.8694	TCGA-HT-8018-01
GBMLGG(N=657)	0.2991	4.63	TCGA-DU-7292-01
GBMLGG(N=657)	0.3292	4.0322	TCGA-S9-A6TU-01
GBMLGG(N=657)	0.3294	3.9478	TCGA-DB-A75P-01
GBMLGG(N=657)	0.2713	3.6635	TCGA-06-5418-01
GBMLGG(N=657)	0.2903	5.0409	TCGA-FG-6691-01
GBMLGG(N=657)	0.303	4.7597	TCGA-DU-6399-01
GBMLGG(N=657)	0.3264	4.4033	TCGA-S9-A7IQ-01
GBMLGG(N=657)	0.268	4.5802	TCGA-06-5414-01
GBMLGG(N=657)	0.3054	3.9204	TCGA-S9-A6WI-01
GBMLGG(N=657)	0.3057	4.2987	TCGA-DB-A64S-01
GBMLGG(N=657)	0.2976	4.2204	TCGA-FG-6692-01
GBMLGG(N=657)	0.2992	4.2358	TCGA-HW-7489-01
GBMLGG(N=657)	0.3313	4.656	TCGA-R8-A6YH-01
GBMLGG(N=657)	0.2709	3.9691	TCGA-06-5417-01
GBMLGG(N=657)	0.311	4.4938	TCGA-HT-A618-01
GBMLGG(N=657)	0.2619	1.5854	TCGA-26-5134-01
GBMLGG(N=657)	0.2997	3.9829	TCGA-QH-A65S-01
GBMLGG(N=657)	0.32	4.2899	TCGA-DU-7019-01
GBMLGG(N=657)	0.2739	5.037	TCGA-76-4925-01
GBMLGG(N=657)	0.3345	4.9007	TCGA-DU-A7TJ-01
GBMLGG(N=657)	0.3296	4.5255	TCGA-TM-A84H-01
GBMLGG(N=657)	0.289	4.8028	TCGA-28-2510-01
GBMLGG(N=657)	0.3175	4.2877	TCGA-S9-A7R8-01
GBMLGG(N=657)	0.3098	4.2624	TCGA-S9-A7R4-01
GBMLGG(N=657)	0.3214	4.641	TCGA-S9-A7J3-01
GBMLGG(N=657)	0.3247	4.3292	TCGA-TM-A84L-01
GBMLGG(N=657)	0.3282	4.3632	TCGA-E1-A7YH-01
GBMLGG(N=657)	0.2839	4.5009	TCGA-06-5413-01
GBMLGG(N=657)	0.2839	4.6759	TCGA-06-0646-01
GBMLGG(N=657)	0.3075	4.5261	TCGA-P5-A5EV-01
GBMLGG(N=657)	0.3146	5.0553	TCGA-DU-A7TD-01
GBMLGG(N=657)	0.3049	4.0046	TCGA-HW-A5KL-01
GBMLGG(N=657)	0.3255	4.3834	TCGA-RY-A83X-01
GBMLGG(N=657)	0.3401	4.9031	TCGA-HT-7687-01
GBMLGG(N=657)	0.3252	4.2009	TCGA-WY-A85A-01
GBMLGG(N=657)	0.2745	3.832	TCGA-12-3650-01
GBMLGG(N=657)	0.2716	4.8385	TCGA-DB-5281-01
GBMLGG(N=657)	0.3297	4.421	TCGA-E1-A7YK-01
GBMLGG(N=657)	0.3018	4.2427	TCGA-DU-A5TU-01
GBMLGG(N=657)	0.2979	4.5802	TCGA-DU-A7TA-01
GBMLGG(N=657)	0.2735	4.862	TCGA-CS-5395-01
GBMLGG(N=657)	0.3198	4.5349	TCGA-TQ-A7RR-01
GBMLGG(N=657)	0.3252	4.1595	TCGA-HT-A5R5-01
GBMLGG(N=657)	0.2723	3.8808	TCGA-12-0616-01
GBMLGG(N=657)	0.3081	3.83	TCGA-QH-A65V-01
GBMLGG(N=657)	0.3241	4.3046	TCGA-S9-A6WP-01
GBMLGG(N=657)	0.2688	5.0492	TCGA-28-5215-01
GBMLGG(N=657)	0.2739	4.4602	TCGA-19-2620-01
GBMLGG(N=657)	0.3013	4.0532	TCGA-S9-A6U5-01
GBMLGG(N=657)	0.321	4.6854	TCGA-E1-A7YO-01
GBMLGG(N=657)	0.3311	4.8625	TCGA-QH-A6X8-01
GBMLGG(N=657)	0.3365	4.7285	TCGA-HT-7610-01
GBMLGG(N=657)	0.3477	4.5687	TCGA-HT-7875-01
GBMLGG(N=657)	0.2809	3.9608	TCGA-16-0846-01
GBMLGG(N=657)	0.3192	3.8269	TCGA-R8-A6MK-01
GBMLGG(N=657)	0.3298	4.481	TCGA-P5-A5F0-01
GBMLGG(N=657)	0.3227	4.287	TCGA-R8-A73M-01
GBMLGG(N=657)	0.2642	4.7437	TCGA-02-0047-01
GBMLGG(N=657)	0.3057	4.4243	TCGA-S9-A6TS-01
GBMLGG(N=657)	0.3338	3.74	TCGA-S9-A6TW-01
GBMLGG(N=657)	0.2619	3.9002	TCGA-E1-5303-01
GBMLGG(N=657)	0.2975	4.4549	TCGA-HT-7606-01
GBMLGG(N=657)	0.3029	4.4634	TCGA-DU-6408-01
GBMLGG(N=657)	0.2944	4.1946	TCGA-FG-5964-01
GBMLGG(N=657)	0.3118	4.5754	TCGA-DB-A64Q-01
GBMLGG(N=657)	0.3315	4.481	TCGA-S9-A7IZ-01
GBMLGG(N=657)	0.2988	4.096	TCGA-S9-A6WH-01
GBMLGG(N=657)	0.3357	3.866	TCGA-HT-7602-01
GBMLGG(N=657)	0.2806	4.656	TCGA-19-2624-01
GBMLGG(N=657)	0.3299	4.3335	TCGA-DU-A6S8-01
GBMLGG(N=657)	0.3188	4.3972	TCGA-HT-7858-01
GBMLGG(N=657)	0.2687	4.3604	TCGA-32-1982-01
GBMLGG(N=657)	0.2676	4.4183	TCGA-27-1835-01
GBMLGG(N=657)	0.3097	5.0747	TCGA-HT-7860-01
GBMLGG(N=657)	0.3065	5.2025	TCGA-DU-7006-01
GBMLGG(N=657)	0.2989	4.3321	TCGA-TQ-A7RS-01
GBMLGG(N=657)	0.3058	4.3119	TCGA-DU-7009-01
GBMLGG(N=657)	0.2796	4.6136	TCGA-06-0747-01
GBMLGG(N=657)	0.3135	4.8405	TCGA-DU-7010-01
GBMLGG(N=657)	0.3128	4.2892	TCGA-QH-A6X3-01
GBMLGG(N=657)	0.342	4.9575	TCGA-DU-8164-01
GBMLGG(N=657)	0.3024	3.9737	TCGA-DU-7018-01
GBMLGG(N=657)	0.3173	4.3744	TCGA-RY-A843-01
GBMLGG(N=657)	0.3225	3.4437	TCGA-DU-7014-01
GBMLGG(N=657)	0.3422	4.6571	TCGA-HT-7693-01
GBMLGG(N=657)	0.3098	3.3047	TCGA-FG-A6J3-01
GBMLGG(N=657)	0.2655	4.061	TCGA-28-5220-01
GBMLGG(N=657)	0.3186	5.2419	TCGA-HT-8106-01
GBMLGG(N=657)	0.2962	4.6445	TCGA-HT-7472-01
GBMLGG(N=657)	0.2746	3.3148	TCGA-14-0817-01
GBMLGG(N=657)	0.333	4.2556	TCGA-HT-7855-01
GBMLGG(N=657)	0.2611	4.3814	TCGA-06-2570-01
GBMLGG(N=657)	0.3259	4.8545	TCGA-DB-A4XG-01
GBMLGG(N=657)	0.3144	4.6702	TCGA-HT-A5RC-01
GBMLGG(N=657)	0.3238	4.5318	TCGA-VM-A8C8-01
GBMLGG(N=657)	0.3192	4.4061	TCGA-HT-7681-01
GBMLGG(N=657)	0.2857	4.6588	TCGA-41-4097-01
GBMLGG(N=657)	0.3401	4.2684	TCGA-DU-A6S2-01
GBMLGG(N=657)	0.3361	4.0739	TCGA-DU-7309-01
GBMLGG(N=657)	0.3094	3.6219	TCGA-DB-A4XH-01
GBMLGG(N=657)	0.3123	4.3855	TCGA-HT-7485-01
GBMLGG(N=657)	0.3031	4.4162	TCGA-VW-A7QS-01
GBMLGG(N=657)	0.2679	4.65909	TCGA-06-0211-01
GBMLGG(N=657)	0.3199	4.1466	TCGA-VV-A86M-01
GBMLGG(N=657)	0.321	4.322	TCGA-E1-A7YV-01
GBMLGG(N=657)	0.3085	4.8778	TCGA-HT-7468-01
GBMLGG(N=657)	0.2721	4.0091	TCGA-02-2483-01
GBMLGG(N=657)	0.3353	4.958	TCGA-HT-7677-01
GBMLGG(N=657)	0.2719	4.7991	TCGA-76-4931-01
GBMLGG(N=657)	0.3033	4.2616	TCGA-DU-A5TY-01
GBMLGG(N=657)	0.3149	4.2495	TCGA-HT-8109-01
GBMLGG(N=657)	0.3132	3.97	TCGA-HT-7479-01
GBMLGG(N=657)	0.2726	4.4913	TCGA-DB-5275-01
GBMLGG(N=657)	0.3311	4.2389	TCGA-TM-A7C4-01
GBMLGG(N=657)	0.2726	4.6393	TCGA-27-2523-01
GBMLGG(N=657)	0.2742	4.4562	TCGA-27-1837-01
GBMLGG(N=657)	0.3194	4.449	TCGA-DH-A7UU-01
GBMLGG(N=657)	0.2839	3.6324	TCGA-06-0744-01
GBMLGG(N=657)	0.3128	4.2095	TCGA-HT-A4DV-01
GBMLGG(N=657)	0.3213	4.6793	TCGA-FG-8186-01
GBMLGG(N=657)	0.2957	4.6212	TCGA-FG-A4MT-01
GBMLGG(N=657)	0.3067	4.4357	TCGA-E1-5305-01
GBMLGG(N=657)	0.2715	4.1644	TCGA-CS-5393-01
GBMLGG(N=657)	0.2954	4.0799	TCGA-DU-6395-01
GBMLGG(N=657)	0.3072	3.834	TCGA-DB-A64X-01
GBMLGG(N=657)	0.3268	4.3938	TCGA-S9-A7IS-01
GBMLGG(N=657)	0.3203	4.1668	TCGA-HT-7856-01
GBMLGG(N=657)	0.2667	3.7571	TCGA-06-0750-01
GBMLGG(N=657)	0.258	3.5149	TCGA-32-5222-01
GBMLGG(N=657)	0.3085	4.0532	TCGA-QH-A6XA-01
GBMLGG(N=657)	0.3201	3.8944	TCGA-P5-A77W-01
GBMLGG(N=657)	0.2674	4.4887	TCGA-27-2519-01
GBMLGG(N=657)	0.281	4.5485	TCGA-CS-4942-01
GBMLGG(N=657)	0.2942	4.6657	TCGA-CS-6186-01
GBMLGG(N=657)	0.3056	4.7603	TCGA-DU-7008-01
GBMLGG(N=657)	0.3311	4.5361	TCGA-HT-7688-01
GBMLGG(N=657)	0.3095	4.4196	TCGA-DU-A7T8-01
GBMLGG(N=657)	0.3307	3.6335	TCGA-DU-A6S3-01
GBMLGG(N=657)	0.3034	4.481	TCGA-DB-A64U-01
GBMLGG(N=657)	0.2984	4.4823	TCGA-HT-A61C-01
GBMLGG(N=657)	0.2969	4.5736	TCGA-12-0821-01
GBMLGG(N=657)	0.3059	4.1474	TCGA-TQ-A7RF-01
GBMLGG(N=657)	0.2909	4.7913	TCGA-19-2619-01
GBMLGG(N=657)	0.3289	4.9041	TCGA-F6-A8O3-01
GBMLGG(N=657)	0.3103	4.2803	TCGA-R8-A6ML-01
GBMLGG(N=657)	0.3051	4.3349	TCGA-DU-A5TT-01
GBMLGG(N=657)	0.3252	4.3031	TCGA-QH-A870-01
GBMLGG(N=657)	0.3276	4.0064	TCGA-DB-A75O-01
GBMLGG(N=657)	0.322	4.6416	TCGA-HT-8111-01
GBMLGG(N=657)	0.3165	4.5342	TCGA-S9-A7QZ-01
GBMLGG(N=657)	0.2888	4.8997	TCGA-12-0619-01
GBMLGG(N=657)	0.2724	4.208	TCGA-DB-5273-01
GBMLGG(N=657)	0.3411	4.4926	TCGA-HT-7470-01
GBMLGG(N=657)	0.3172	4.0331	TCGA-FG-A4MY-01
GBMLGG(N=657)	0.3235	4.6838	TCGA-HT-8108-01
GBMLGG(N=657)	0.2953	4.6651	TCGA-DB-A4XE-01
GBMLGG(N=657)	0.3359	3.551	TCGA-HT-A4DS-01
GBMLGG(N=657)	0.345	4.7132	TCGA-DU-8158-01
GBMLGG(N=657)	0.3025	4.4357	TCGA-HT-7474-01
GBMLGG(N=657)	0.2646	4.1523	TCGA-DH-5143-01
GBMLGG(N=657)	0.2963	4.4317	TCGA-TQ-A7RJ-01
GBMLGG(N=657)	0.3143	3.9012	TCGA-S9-A7QY-01
GBMLGG(N=657)	0.306	4.0627	TCGA-DB-A4XA-01
GBMLGG(N=657)	0.274	3.506	TCGA-28-5213-01
GBMLGG(N=657)	0.3289	4.0653	TCGA-P5-A731-01
GBMLGG(N=657)	0.3292	4.9416	TCGA-E1-A7YE-01
GBMLGG(N=657)	0.3077	4.3126	TCGA-FG-A710-01
GBMLGG(N=657)	0.3236	3.7919	TCGA-HT-8010-01
GBMLGG(N=657)	0.3023	4.4476	TCGA-DU-7299-01
GBMLGG(N=657)	0.2639	4.4463	TCGA-DB-5270-01
GBMLGG(N=657)	0.2756	5.0299	TCGA-14-0789-01
GBMLGG(N=657)	0.3322	4.2766	TCGA-KT-A74X-01
GBMLGG(N=657)	0.3292	4.433	TCGA-DB-A75L-01
GBMLGG(N=657)	0.2961	4.4357	TCGA-HT-A616-01
GBMLGG(N=657)	0.3281	3.7971	TCGA-HT-A74K-01
GBMLGG(N=657)	0.3184	4.178	TCGA-WY-A85C-01
GBMLGG(N=657)	0.3307	4.4595	TCGA-FG-8188-01
GBMLGG(N=657)	0.3117	4.7777	TCGA-DU-A6S7-01
GBMLGG(N=657)	0.3004	4.6218	TCGA-DU-7294-01
GBMLGG(N=657)	0.268	2.7139	TCGA-DB-5274-01
GBMLGG(N=657)	0.2631	4.7971	TCGA-28-5209-01
GBMLGG(N=657)	0.3542	4.7756	TCGA-HT-7604-01
GBMLGG(N=657)	0.3261	4.131	TCGA-TM-A84F-01
GBMLGG(N=657)	0.3045	4.2381	TCGA-DB-A64O-01
GBMLGG(N=657)	0.3233	4.4263	TCGA-HT-7884-01
GBMLGG(N=657)	0.308	4.2943	TCGA-S9-A6WE-01
GBMLGG(N=657)	0.3068	4.1915	TCGA-QH-A6CY-01
GBMLGG(N=657)	0.3107	4.6866	TCGA-S9-A6WM-01
GBMLGG(N=657)	0.2892	4.7231	TCGA-28-5218-01
GBMLGG(N=657)	0.3277	4.9607	TCGA-HT-A5RA-01
GBMLGG(N=657)	0.3116	4.3576	TCGA-QH-A6CV-01
GBMLGG(N=657)	0.315	4.3263	TCGA-VM-A8CE-01
GBMLGG(N=657)	0.2992	4.5336	TCGA-DU-5852-01
GBMLGG(N=657)	0.3156	4.073	TCGA-P5-A72U-01
GBMLGG(N=657)	0.261	4.7464	TCGA-28-2514-01
GBMLGG(N=657)	0.3054	4.0627	TCGA-06-5859-01
GBMLGG(N=657)	0.3281	4.3834	TCGA-DB-A75K-01
GBMLGG(N=657)	0.3115	4.4397	TCGA-DU-6410-01
GBMLGG(N=657)	0.2915	4.5632	TCGA-28-2509-01
GBMLGG(N=657)	0.3006	4.2072	TCGA-QH-A65Z-01
GBMLGG(N=657)	0.2743	4.4906	TCGA-14-1825-01
GBMLGG(N=657)	0.3209	3.8729	TCGA-S9-A7IY-01
GBMLGG(N=657)	0.3122	4.0019	TCGA-P5-A781-01
GBMLGG(N=657)	0.3214	5.0536	TCGA-TM-A84G-01
GBMLGG(N=657)	0.3076	4.3667	TCGA-HW-A5KK-01
GBMLGG(N=657)	0.2577	4.6577	TCGA-E1-5311-01
GBMLGG(N=657)	0.3424	4.9055	TCGA-FG-7634-01
GBMLGG(N=657)	0.2913	4.0653	TCGA-DU-5855-01
GBMLGG(N=657)	0.2915	4.7377	TCGA-DU-6396-01
GBMLGG(N=657)	0.3315	4.2601	TCGA-19-4065-01
GBMLGG(N=657)	0.3356	4.2743	TCGA-FG-7643-01
GBMLGG(N=657)	0.3227	4.5392	TCGA-TM-A84C-01
GBMLGG(N=657)	0.2728	4.2304	TCGA-02-2485-01
GBMLGG(N=657)	0.3171	4.1684	TCGA-WY-A85E-01
GBMLGG(N=657)	0.279	3.1908	TCGA-12-1597-01
GBMLGG(N=657)	0.2715	4.656	TCGA-28-1747-01
GBMLGG(N=657)	0.2863	4.1595	TCGA-28-2499-01
GBMLGG(N=657)	0.3159	4.6474	TCGA-DU-7298-01
GBMLGG(N=657)	0.3181	4.0575	TCGA-TM-A84T-01
GBMLGG(N=657)	0.3339	4.3082	TCGA-FG-7637-01
GBMLGG(N=657)	0.3315	4.2892	TCGA-HT-A5R9-01
GBMLGG(N=657)	0.3017	4.5142	TCGA-HT-A614-01
GBMLGG(N=657)	0.2803	4.2009	TCGA-06-0649-01
GBMLGG(N=657)	0.3077	4.1153	TCGA-QH-A65R-01
GBMLGG(N=657)	0.3257	4.4142	TCGA-FG-A60J-01
GBMLGG(N=657)	0.3082	4.8319	TCGA-FG-8189-01
GBMLGG(N=657)	0.295	3.7105	TCGA-P5-A5EY-01
GBMLGG(N=657)	0.2692	5.109	TCGA-06-2564-01
GBMLGG(N=657)	0.2961	4.7415	TCGA-06-5408-01
GBMLGG(N=657)	0.2741	3.6827	TCGA-27-1832-01
GBMLGG(N=657)	0.2721	2.2082	TCGA-14-1829-01
GBMLGG(N=657)	0.2767	4.6747	TCGA-32-2615-01
GBMLGG(N=657)	0.2707	4.8284	TCGA-06-0158-01
GBMLGG(N=657)	0.3004	4.9769	TCGA-HT-7882-01
GBMLGG(N=657)	0.2652	4.6335	TCGA-06-2558-01
GBMLGG(N=657)	0.3254	4.309	TCGA-HT-8011-01
GBMLGG(N=657)	0.2917	4.8125	TCGA-DU-6394-01
GBMLGG(N=657)	0.2729	4.178	TCGA-28-5216-01
GBMLGG(N=657)	0.3152	4.5466	TCGA-WY-A859-01
GBMLGG(N=657)	0.3309	4.6189	TCGA-WY-A85B-01
GBMLGG(N=657)	0.3065	4.6101	TCGA-S9-A6UB-01
GBMLGG(N=657)	0.2799	4.735	TCGA-28-5207-01
GBMLGG(N=657)	0.2982	4.3793	TCGA-S9-A6U6-01
GBMLGG(N=657)	0.3378	5.0317	TCGA-DU-8168-01
GBMLGG(N=657)	0.2819	3.8501	TCGA-41-2572-01
GBMLGG(N=657)	0.2763	5.1946	TCGA-06-0130-01
GBMLGG(N=657)	0.2983	4.6977	TCGA-DU-7290-01
GBMLGG(N=657)	0.2849	3.6125	TCGA-06-5416-01
GBMLGG(N=657)	0.274	3.4804	TCGA-06-0168-01
GBMLGG(N=657)	0.2971	4.4958	TCGA-DU-6407-01
GBMLGG(N=657)	0.2745	4.3406	TCGA-02-0055-01
GBMLGG(N=657)	0.3289	4.8038	TCGA-HT-7601-01
GBMLGG(N=657)	0.2843	4.735	TCGA-DU-6403-01
GBMLGG(N=657)	0.2682	4.1466	TCGA-06-5415-01
GBMLGG(N=657)	0.3077	4.7121	TCGA-DB-A64R-01
GBMLGG(N=657)	0.3293	4.6938	TCGA-E1-A7YQ-01
GBMLGG(N=657)	0.2937	4.9402	TCGA-DU-6405-01
GBMLGG(N=657)	0.2926	4.1986	TCGA-HW-7487-01
GBMLGG(N=657)	0.3214	4.2033	TCGA-S9-A7R2-01
GBMLGG(N=657)	0.3272	4.6	TCGA-S9-A7J1-01
GBMLGG(N=657)	0.3191	4.2419	TCGA-P5-A72X-01
GBMLGG(N=657)	0.3257	4.7496	TCGA-E1-A7YJ-01
GBMLGG(N=657)	0.2943	4.1236	TCGA-06-5411-01
GBMLGG(N=657)	0.2619	4.4562	TCGA-26-5139-01
GBMLGG(N=657)	0.3378	4.783	TCGA-HT-7690-01
GBMLGG(N=657)	0.3369	4.4751	TCGA-HT-8105-01
GBMLGG(N=657)	0.2737	4.2862	TCGA-76-4928-01
GBMLGG(N=657)	0.2763	4.6702	TCGA-06-0644-01
GBMLGG(N=657)	0.3106	4.6236	TCGA-E1-A7YY-01
GBMLGG(N=657)	0.3159	4.6288	TCGA-HT-A619-01
GBMLGG(N=657)	0.2966	4.3786	TCGA-DU-6400-01
GBMLGG(N=657)	0.3204	3.705	TCGA-P5-A737-01
GBMLGG(N=657)	0.2899	4.0091	TCGA-14-0871-01
GBMLGG(N=657)	0.3147	4.3349	TCGA-RY-A83Y-01
GBMLGG(N=657)	0.4513	4.906	TCGA-HT-8564-01
GBMLGG(N=657)	0.3197	4.5596	TCGA-HT-7686-01
GBMLGG(N=657)	0.3181	4.1571	TCGA-E1-A7YM-01
GBMLGG(N=657)	0.3079	4.001	TCGA-DH-A66F-01
GBMLGG(N=657)	0.2623	4.5053	TCGA-CS-5390-01
GBMLGG(N=657)	0.2953	5.0657	TCGA-S9-A6UA-01
GBMLGG(N=657)	0.2716	4.4081	TCGA-32-2632-01
GBMLGG(N=657)	0.3341	4.9113	TCGA-FG-A87N-01
GBMLGG(N=657)	0.3226	3.9838	TCGA-VV-A829-01
GBMLGG(N=657)	0.3027	4.4615	TCGA-DH-A66B-01
GBMLGG(N=657)	0.3312	4.306	TCGA-HT-A5R7-01
GBMLGG(N=657)	0.3295	4.677	TCGA-CS-5394-01
GBMLGG(N=657)	0.312	4.7861	TCGA-DH-A66D-01
GBMLGG(N=657)	0.3151	4.3653	TCGA-HT-7877-01
GBMLGG(N=657)	0.2696	4.7187	TCGA-06-0882-01
GBMLGG(N=657)	0.3062	4.8435	TCGA-DU-6542-01
GBMLGG(N=657)	0.3038	4.3421	TCGA-QH-A6CS-01
GBMLGG(N=657)	0.3198	4.2335	TCGA-E1-A7YU-01
GBMLGG(N=657)	0.3258	4.2899	TCGA-W9-A837-01
GBMLGG(N=657)	0.3523	4.5274	TCGA-IK-7675-01
GBMLGG(N=657)	0.3466	4.1384	TCGA-DU-7306-01
GBMLGG(N=657)	0.3346	4.5559	TCGA-QH-A6X9-01
GBMLGG(N=657)	0.3121	4.9132	TCGA-S9-A6U0-01
GBMLGG(N=657)	0.3385	4.7209	TCGA-HT-7611-01
GBMLGG(N=657)	0.3165	4.1547	TCGA-S9-A6TY-01
GBMLGG(N=657)	0.2925	4.1716	TCGA-DU-A7TB-01
GBMLGG(N=657)	0.2834	4.1285	TCGA-19-2625-01
GBMLGG(N=657)	0.3048	4.2526	TCGA-IK-8125-01
GBMLGG(N=657)	0.3211	3.6405	TCGA-WH-A86K-01
GBMLGG(N=657)	0.2583	3.7226	TCGA-DH-5141-01
GBMLGG(N=657)	0.3126	3.7061	TCGA-FG-A60L-01
GBMLGG(N=657)	0.2732	4.859	TCGA-DB-5280-01
GBMLGG(N=657)	0.3186	4.373	TCGA-S9-A7IX-01
GBMLGG(N=657)	0.2972	4.4542	TCGA-32-1980-01
GBMLGG(N=657)	0.2951	4.6012	TCGA-FG-5965-01
GBMLGG(N=657)	0.3526	5.2048	TCGA-P5-A5F6-01
GBMLGG(N=657)	0.2731	4.5964	TCGA-27-1834-01
GBMLGG(N=657)	0.3159	5.2107	TCGA-DU-7007-01
GBMLGG(N=657)	0.3003	3.9992	TCGA-HW-7490-01
GBMLGG(N=657)	0.3077	4.5675	TCGA-CS-6188-01
GBMLGG(N=657)	0.3029	4.8944	TCGA-CS-6668-01
GBMLGG(N=657)	0.3305	5.3615	TCGA-DU-8165-01
GBMLGG(N=657)	0.3302	3.3076	TCGA-HT-7692-01
GBMLGG(N=657)	0.3073	4.7077	TCGA-TQ-A7RM-01
GBMLGG(N=657)	0.3379	5.1231	TCGA-DU-8161-01
GBMLGG(N=657)	0.331	3.9308	TCGA-P5-A736-01
GBMLGG(N=657)	0.2918	4.1547	TCGA-DU-6401-01
GBMLGG(N=657)	0.3187	3.8095	TCGA-HT-A74H-01
GBMLGG(N=657)	0.2728	3.7836	TCGA-41-2571-01
GBMLGG(N=657)	0.3217	4.5236	TCGA-TQ-A7RV-01
GBMLGG(N=657)	0.2925	4.7005	TCGA-14-0781-01
GBMLGG(N=657)	0.2932	4.4868	TCGA-HT-7483-01
GBMLGG(N=657)	0.3037	3.9421	TCGA-HT-7620-01
GBMLGG(N=657)	0.3363	4.7735	TCGA-HT-7480-01
GBMLGG(N=657)	0.2759	4.439	TCGA-06-0157-01
GBMLGG(N=657)	0.3264	4.9379	TCGA-S9-A7J0-01
GBMLGG(N=657)	0.2826	4.6623	TCGA-12-3653-01
GBMLGG(N=657)	0.325	4.8987	TCGA-TM-A84Q-01
GBMLGG(N=657)	0.2626	4.7318	TCGA-76-4926-01
GBMLGG(N=657)	0.2808	4.4932	TCGA-26-5133-01
GBMLGG(N=657)	0.2614	4.7851	TCGA-06-2562-01
GBMLGG(N=657)	0.3174	3.9534	TCGA-RY-A847-01
GBMLGG(N=657)	0.3177	4.4377	TCGA-TQ-A7RQ-01
GBMLGG(N=657)	0.307	4.8729	TCGA-TQ-A7RW-01
GBMLGG(N=657)	0.3244	3.863	TCGA-FG-8191-01
GBMLGG(N=657)	0.3285	4.5711	TCGA-E1-A7YW-01
GBMLGG(N=657)	0.2659	4.6944	TCGA-DB-5278-01
GBMLGG(N=657)	0.325	4.8817	TCGA-E1-A7YS-01
GBMLGG(N=657)	0.353	4.4108	TCGA-HT-7695-01
GBMLGG(N=657)	0.3339	4.4641	TCGA-DU-7012-01
GBMLGG(N=657)	0.3098	4.6977	TCGA-HT-7879-01
GBMLGG(N=657)	0.3255	3.9232	TCGA-DU-A7TC-01
GBMLGG(N=657)	0.2704	3.87	TCGA-27-2521-01
GBMLGG(N=657)	0.3507	4.0619	TCGA-HT-7680-01
GBMLGG(N=657)	0.3146	4.504	TCGA-DB-A4X9-01
GBMLGG(N=657)	0.324	4.7154	TCGA-TQ-A7RI-01
GBMLGG(N=657)	0.3096	4.3177	TCGA-TM-A7CA-01
GBMLGG(N=657)	0.3124	4.5053	TCGA-QH-A86X-01
GBMLGG(N=657)	0.3275	4.3917	TCGA-DU-A76R-01
GBMLGG(N=657)	0.2628	4.6218	TCGA-DH-5144-01
GBMLGG(N=657)	0.3173	3.4156	TCGA-41-5651-01
GBMLGG(N=657)	0.3159	4.5711	TCGA-E1-A7Z2-01
GBMLGG(N=657)	0.3051	4.3292	TCGA-DU-A5TP-01
GBMLGG(N=657)	0.2695	4.4417	TCGA-06-0210-01
GBMLGG(N=657)	0.3327	3.8228	TCGA-FG-8187-01
GBMLGG(N=657)	0.2753	4.9002	TCGA-E1-5304-01
GBMLGG(N=657)	0.2751	4.468	TCGA-CS-4943-01
GBMLGG(N=657)	0.2954	4.8202	TCGA-19-5960-01
GBMLGG(N=657)	0.2763	4.1327	TCGA-06-0686-01
GBMLGG(N=657)	0.2629	4.7725	TCGA-DH-5140-01
GBMLGG(N=657)	0.3249	4.1252	TCGA-TM-A7CF-01
GBMLGG(N=657)	0.2996	4.232	TCGA-DH-A7US-01
GBMLGG(N=657)	0.3194	4.3039	TCGA-HT-A61B-01
GBMLGG(N=657)	0.3107	4.2892	TCGA-E1-A7Z6-01
GBMLGG(N=657)	0.3135	4.8525	TCGA-HT-7857-01
GBMLGG(N=657)	0.3071	4.0985	TCGA-E1-5319-01
GBMLGG(N=657)	0.3178	3.4477	TCGA-DU-A5TS-01
GBMLGG(N=657)	0.5506	5.0709	TCGA-DU-6392-01
GBMLGG(N=657)	0.3199	3.4477	TCGA-QH-A6CU-01
GBMLGG(N=657)	0.2898	4.9232	TCGA-DU-6404-01
GBMLGG(N=657)	0.3289	3.47	TCGA-VW-A8FI-01
GBMLGG(N=657)	0.3207	4.6171	TCGA-HT-A74L-01
GBMLGG(N=657)	0.3157	4.6776	TCGA-P5-A5EU-01
GBMLGG(N=657)	0.3087	3.492	TCGA-P5-A5EZ-01
GBMLGG(N=657)	0.3042	4.0636	TCGA-S9-A89Z-01
GBMLGG(N=657)	0.3258	4.6921	TCGA-S9-A6TZ-01
GBMLGG(N=657)	0.2997	4.6177	TCGA-FG-5963-01
GBMLGG(N=657)	0.307	4.2914	TCGA-HT-A61A-01
GBMLGG(N=657)	0.3258	4.6195	TCGA-S9-A89V-01
GBMLGG(N=657)	0.3127	4.5832	TCGA-DB-A64W-01
GBMLGG(N=657)	0.2943	2.8681	TCGA-FG-A4MX-01
GBMLGG(N=657)	0.3185	4.9915	TCGA-P5-A72Z-01
GBMLGG(N=657)	0.3168	4.8699	TCGA-HT-8114-01
GBMLGG(N=657)	0.2704	4.7005	TCGA-06-2563-01
GBMLGG(N=657)	0.29	4.8274	TCGA-15-1444-01
GBMLGG(N=657)	0.2788	2.2452	TCGA-32-4213-01
GBMLGG(N=657)	0.323	4.3855	TCGA-HT-7881-01
GBMLGG(N=657)	0.2727	4.4061	TCGA-15-0742-01
GBMLGG(N=657)	0.2697	3.4183	TCGA-CS-4944-01
GBMLGG(N=657)	0.3894	4.7704	TCGA-06-0187-01
GBMLGG(N=657)	0.2907	4.9887	TCGA-19-1390-01
GBMLGG(N=657)	0.3129	3.9654	TCGA-S9-A7QX-01
GBMLGG(N=657)	0.3196	4.0549	TCGA-DU-A7TG-01
GBMLGG(N=657)	0.3014	4.7022	TCGA-DU-5874-01
GBMLGG(N=657)	0.3362	4.5047	TCGA-TQ-A8XE-01
GBMLGG(N=657)	0.3353	4.3299	TCGA-DU-7300-01
GBMLGG(N=657)	0.3431	4.3896	TCGA-HT-7694-01
GBMLGG(N=657)	0.3498	4.926	TCGA-HT-7471-01
GBMLGG(N=657)	0.3121	4.6077	TCGA-DB-A4XD-01
GBMLGG(N=657)	0.3029	4.4074	TCGA-TQ-A7RK-01
GBMLGG(N=657)	0.3106	4.1523	TCGA-HT-7475-01
GBMLGG(N=657)	0.3066	4.8934	TCGA-TQ-A7RO-01
GBMLGG(N=657)	0.3317	4.6247	TCGA-HT-7902-01
GBMLGG(N=657)	0.2984	4.3463	TCGA-FG-A711-01
GBMLGG(N=657)	0.2881	4.4874	TCGA-06-2557-01
GBMLGG(N=657)	0.2762	4.5091	TCGA-DB-5276-01
GBMLGG(N=657)	0.3176	3.7741	TCGA-P5-A730-01
GBMLGG(N=657)	0.3261	4.8213	TCGA-E1-A7YD-01
GBMLGG(N=657)	0.3228	3.9874	TCGA-HT-A74O-01
GBMLGG(N=657)	0.3105	4.511	TCGA-HT-8015-01
GBMLGG(N=657)	0.3272	4.9769	TCGA-HT-A74J-01
GBMLGG(N=657)	0.267	4.8655	TCGA-06-0878-01
GBMLGG(N=657)	0.323	4.2427	TCGA-DH-A669-01
GBMLGG(N=657)	0.2758	4.7929	TCGA-06-0129-01
GBMLGG(N=657)	0.3049	4.3256	TCGA-HT-A617-01
GBMLGG(N=657)	0.2652	4.9336	TCGA-16-1045-01
GBMLGG(N=657)	0.2749	4.4364	TCGA-06-2567-01
GBMLGG(N=657)	0.321	4.7088	TCGA-32-2616-01
GBMLGG(N=657)	0.3393	4.1636	TCGA-HT-7605-01
GBMLGG(N=657)	0.3207	4.5946	TCGA-S9-A6WO-01
GBMLGG(N=657)	0.2613	4.1962	TCGA-28-5208-01
GBMLGG(N=657)	0.2911	5.4313	TCGA-06-1804-01
GBMLGG(N=657)	0.3271	3.867	TCGA-QH-A6CX-01
GBMLGG(N=657)	0.2618	2.8955	TCGA-14-2554-01
GBMLGG(N=657)	0.3366	4.2624	TCGA-P5-A5F4-01
GBMLGG(N=657)	0.3053	4.2266	TCGA-DU-A76K-01
GBMLGG(N=657)	0.3204	4.3744	TCGA-VM-A8CH-01
GBMLGG(N=657)	0.3513	4.2541	TCGA-HT-7609-01
GBMLGG(N=657)	0.2737	4.166	TCGA-27-2528-01
GBMLGG(N=657)	0.3233	4.4047	TCGA-QH-A6X4-01
GBMLGG(N=657)	0.3082	4.2676	TCGA-DH-A7UV-01
GBMLGG(N=657)	0.3229	3.8729	TCGA-TM-A7C3-01
GBMLGG(N=657)	0.3054	4.3342	TCGA-S9-A6WG-01
GBMLGG(N=657)	0.3491	4.8958	TCGA-06-5858-01
GBMLGG(N=657)	0.3072	4.3827	TCGA-FG-6690-01
GBMLGG(N=657)	0.3418	3.9337	TCGA-DU-8167-01
GBMLGG(N=657)	0.3232	4.222	TCGA-QH-A65X-01
GBMLGG(N=657)	0.2721	2.3077	TCGA-06-0178-01
GBMLGG(N=657)	0.3274	3.8471	TCGA-P5-A780-01
GBMLGG(N=657)	0.2649	4.641	TCGA-E1-5302-01
GBMLGG(N=657)	0.2769	3.1637	TCGA-14-1823-01
GBMLGG(N=657)	0.3105	2.9618	TCGA-HW-A5KJ-01
GBMLGG(N=657)	0.3072	4.3356	TCGA-R8-A6MO-01
GBMLGG(N=657)	0.3321	4.1466	TCGA-FG-7636-01
GBMLGG(N=657)	0.2888	4.1539	TCGA-CS-6290-01
GBMLGG(N=657)	0.2986	4.2862	TCGA-DU-5847-01
GBMLGG(N=657)	0.3013	5.1339	TCGA-DU-6406-01
GBMLGG(N=657)	0.2901	3.9571	TCGA-06-0743-01
GBMLGG(N=657)	0.3428	4.9524	TCGA-TM-A84B-01
LGG(N=506)	0.3226	4.5349	TCGA-S9-A7J2-01
LGG(N=506)	0.3294	4.7426	TCGA-E1-A7YI-01
LGG(N=506)	0.3434	4.7016	TCGA-DU-7302-01
LGG(N=506)	0.331	4.5205	TCGA-DU-A7TI-01
LGG(N=506)	0.3291	4.2533	TCGA-P5-A5EX-01
LGG(N=506)	0.3059	5.3045	TCGA-HT-8563-01
LGG(N=506)	0.3046	4.4874	TCGA-FG-A60K-01
LGG(N=506)	0.2936	5.1526	TCGA-CS-5397-01
LGG(N=506)	0.2614	4.5862	TCGA-E1-5322-01
LGG(N=506)	0.3126	4.2995	TCGA-HT-8558-01
LGG(N=506)	0.2927	4.4732	TCGA-S9-A6U8-01
LGG(N=506)	0.3046	4.5305	TCGA-HT-7854-01
LGG(N=506)	0.3082	4.1716	TCGA-HT-7467-01
LGG(N=506)	0.3173	4.2373	TCGA-HT-7874-01
LGG(N=506)	0.3293	4.6759	TCGA-S9-A6TV-01
LGG(N=506)	0.3279	4.2987	TCGA-VM-A8CD-01
LGG(N=506)	0.3365	4.4938	TCGA-HT-7616-01
LGG(N=506)	0.3216	4.691	TCGA-KT-A7W1-01
LGG(N=506)	0.3259	4.3442	TCGA-P5-A5F2-01
LGG(N=506)	0.3408	4.2025	TCGA-HT-7607-01
LGG(N=506)	0.3182	4.9612	TCGA-HT-7873-01
LGG(N=506)	0.3088	4.0541	TCGA-HT-7603-01
LGG(N=506)	0.2945	4.197	TCGA-DB-A64P-01
LGG(N=506)	0.2981	4.1939	TCGA-HW-7486-01
LGG(N=506)	0.3352	4.284	TCGA-P5-A5F1-01
LGG(N=506)	0.3028	3.8401	TCGA-DU-7011-01
LGG(N=506)	0.3367	3.7961	TCGA-P5-A77X-01
LGG(N=506)	0.3079	4.2781	TCGA-HW-7493-01
LGG(N=506)	0.3185	3.8759	TCGA-VM-A8CA-01
LGG(N=506)	0.3113	4.4183	TCGA-DU-7015-01
LGG(N=506)	0.3282	4.0153	TCGA-TM-A7C5-01
LGG(N=506)	0.2975	4.565	TCGA-DU-8162-01
LGG(N=506)	0.3239	4.2995	TCGA-TM-A84O-01
LGG(N=506)	0.3032	4.1409	TCGA-S9-A7R3-01
LGG(N=506)	0.307	4.5021	TCGA-TQ-A7RN-01
LGG(N=506)	0.331	4.281	TCGA-DU-A6S6-01
LGG(N=506)	0.3327	4.4437	TCGA-P5-A735-01
LGG(N=506)	0.3188	4.2064	TCGA-HT-7691-01
LGG(N=506)	0.3142	3.4384	TCGA-FG-A6J1-01
LGG(N=506)	0.3103	5.0308	TCGA-S9-A7R7-01
LGG(N=506)	0.2903	4.8465	TCGA-DU-6402-01
LGG(N=506)	0.3053	3.2885	TCGA-HT-7684-01
LGG(N=506)	0.3196	4.8954	TCGA-HT-8104-01
LGG(N=506)	0.3294	4.4615	TCGA-FN-7833-01
LGG(N=506)	0.2863	4.7592	TCGA-HT-7473-01
LGG(N=506)	0.3202	3.7237	TCGA-HT-8019-01
LGG(N=506)	0.3148	4.8324	TCGA-TQ-A7RU-01
LGG(N=506)	0.2994	4.306	TCGA-DB-A4XF-01
LGG(N=506)	0.3232	4.4304	TCGA-FG-A713-01
LGG(N=506)	0.3183	4.2556	TCGA-E1-A7YL-01
LGG(N=506)	0.2798	4.964	TCGA-CS-5396-01
LGG(N=506)	0.3312	4.783	TCGA-HW-8322-01
LGG(N=506)	0.3187	4.0943	TCGA-S9-A6U9-01
LGG(N=506)	0.3427	4.1466	TCGA-HT-7676-01
LGG(N=506)	0.3254	4.7793	TCGA-HT-7469-01
LGG(N=506)	0.3039	4.4938	TCGA-HT-7478-01
LGG(N=506)	0.3286	4.497	TCGA-DU-A5TW-01
LGG(N=506)	0.3238	3.945	TCGA-S9-A6TX-01
LGG(N=506)	0.3219	3.981	TCGA-RY-A83Z-01
LGG(N=506)	0.3011	3.5022	TCGA-FG-A6IZ-01
LGG(N=506)	0.2736	4.7997	TCGA-CS-4941-01
LGG(N=506)	0.3253	3.9874	TCGA-DH-A7UT-01
LGG(N=506)	0.2859	4.3053	TCGA-DU-5871-01
LGG(N=506)	0.3223	4.327	TCGA-HW-8321-01
LGG(N=506)	0.3039	4.9915	TCGA-EZ-7264-01
LGG(N=506)	0.303	4.4713	TCGA-CS-6666-01
LGG(N=506)	0.3073	4.8074	TCGA-HW-7491-01
LGG(N=506)	0.2989	4.7533	TCGA-S9-A6U1-01
LGG(N=506)	0.3001	4.551	TCGA-E1-5307-01
LGG(N=506)	0.3227	4.7751	TCGA-DU-A76L-01
LGG(N=506)	0.2961	4.3292	TCGA-HW-7495-01
LGG(N=506)	0.292	4.0295	TCGA-CS-6669-01
LGG(N=506)	0.328	4.1756	TCGA-HT-7481-01
LGG(N=506)	0.3338	4.7426	TCGA-DU-8163-01
LGG(N=506)	0.317	4.8763	TCGA-HT-8110-01
LGG(N=506)	0.3244	4.0653	TCGA-RY-A840-01
LGG(N=506)	0.3188	3.837	TCGA-VM-A8C9-01
LGG(N=506)	0.3108	4.9246	TCGA-HW-8319-01
LGG(N=506)	0.326	4.7523	TCGA-QH-A6CW-01
LGG(N=506)	0.2838	4.8017	TCGA-DU-5870-01
LGG(N=506)	0.3258	3.9515	TCGA-TM-A84S-01
LGG(N=506)	0.3215	4.673	TCGA-RY-A845-01
LGG(N=506)	0.3007	4.918	TCGA-FG-8182-01
LGG(N=506)	0.3084	4.2181	TCGA-FG-6688-01
LGG(N=506)	0.3122	4.6462	TCGA-TQ-A7RP-01
LGG(N=506)	0.3363	4.1859	TCGA-HT-8113-01
LGG(N=506)	0.3139	4.5748	TCGA-HT-7689-01
LGG(N=506)	0.3535	3.8044	TCGA-FG-7638-01
LGG(N=506)	0.3016	4.6323	TCGA-DU-7013-01
LGG(N=506)	0.3266	4.5199	TCGA-E1-A7Z3-01
LGG(N=506)	0.3046	3.8054	TCGA-HT-7476-01
LGG(N=506)	0.3074	4.511	TCGA-TQ-A7RG-01
LGG(N=506)	0.3245	4.0807	TCGA-FG-8181-01
LGG(N=506)	0.3107	4.2212	TCGA-DU-A7T6-01
LGG(N=506)	0.3289	4.728	TCGA-DB-A4XC-01
LGG(N=506)	0.3281	4.1636	TCGA-FG-A4MW-01
LGG(N=506)	0.2682	4.3681	TCGA-DH-5142-01
LGG(N=506)	0.3006	4.7038	TCGA-S9-A6U2-01
LGG(N=506)	0.3208	4.3855	TCGA-TQ-A7RH-01
LGG(N=506)	0.3329	4.4476	TCGA-DB-A75M-01
LGG(N=506)	0.3326	4.4758	TCGA-HT-8012-01
LGG(N=506)	0.3171	4.5374	TCGA-S9-A7QW-01
LGG(N=506)	0.325	3.47	TCGA-P5-A733-01
LGG(N=506)	0.3246	4.178	TCGA-E1-A7Z4-01
LGG(N=506)	0.3103	3.8177	TCGA-DU-A5TR-01
LGG(N=506)	0.3305	4.1449	TCGA-FG-8185-01
LGG(N=506)	0.3379	4.7318	TCGA-HW-8320-01
LGG(N=506)	0.3037	4.0162	TCGA-CS-6667-01
LGG(N=506)	0.2822	4.4115	TCGA-DU-5849-01
LGG(N=506)	0.2803	4.2684	TCGA-DB-5279-01
LGG(N=506)	0.3002	4.0506	TCGA-CS-6670-01
LGG(N=506)	0.3035	3.8033	TCGA-DB-A64V-01
LGG(N=506)	0.2846	4.5497	TCGA-DU-5854-01
LGG(N=506)	0.3079	4.3772	TCGA-DH-A7UR-01
LGG(N=506)	0.3037	4.5361	TCGA-S9-A6WL-01
LGG(N=506)	0.3401	4.0943	TCGA-HT-7880-01
LGG(N=506)	0.267	4.2396	TCGA-E1-5318-01
LGG(N=506)	0.3022	4.8445	TCGA-DU-6393-01
LGG(N=506)	0.2998	4.2728	TCGA-DU-5853-01
LGG(N=506)	0.3326	4.5952	TCGA-TM-A84J-01
LGG(N=506)	0.3002	4.4686	TCGA-FG-5962-01
LGG(N=506)	0.3305	4.3548	TCGA-F6-A8O4-01
LGG(N=506)	0.3215	3.8218	TCGA-S9-A7R1-01
LGG(N=506)	0.3177	4.756	TCGA-TM-A84M-01
LGG(N=506)	0.3127	4.3999	TCGA-HT-8107-01
LGG(N=506)	0.3079	4.3119	TCGA-P5-A5ET-01
LGG(N=506)	0.322	3.9801	TCGA-P5-A72W-01
LGG(N=506)	0.3158	4.3242	TCGA-FG-A70Y-01
LGG(N=506)	0.3172	4.4061	TCGA-TM-A84R-01
LGG(N=506)	0.2977	4.565	TCGA-HW-A5KM-01
LGG(N=506)	0.324	4.8415	TCGA-HT-7477-01
LGG(N=506)	0.3257	4.3406	TCGA-FG-A87Q-01
LGG(N=506)	0.3071	4.3814	TCGA-FG-A70Z-01
LGG(N=506)	0.3113	4.673	TCGA-FG-A4MU-01
LGG(N=506)	0.3091	5.2262	TCGA-DB-A4XB-01
LGG(N=506)	0.3142	4.3827	TCGA-WY-A85D-01
LGG(N=506)	0.3328	4.3349	TCGA-FG-7641-01
LGG(N=506)	0.3001	3.9728	TCGA-DU-5872-01
LGG(N=506)	0.3059	4.131	TCGA-FG-6689-01
LGG(N=506)	0.2819	4.6502	TCGA-DB-5277-01
LGG(N=506)	0.2926	4.5466	TCGA-HT-A615-01
LGG(N=506)	0.3472	4.5398	TCGA-DU-7301-01
LGG(N=506)	0.3161	4.5657	TCGA-P5-A5EW-01
LGG(N=506)	0.3218	4.1796	TCGA-HT-A5RB-01
LGG(N=506)	0.3204	4.7751	TCGA-E1-A7YN-01
LGG(N=506)	0.3276	4.3869	TCGA-QH-A6XC-01
LGG(N=506)	0.306	4.9336	TCGA-S9-A6WN-01
LGG(N=506)	0.298	4.2921	TCGA-DB-A64L-01
LGG(N=506)	0.3189	4.8812	TCGA-TM-A84I-01
LGG(N=506)	0.3324	4.2965	TCGA-QH-A6CZ-01
LGG(N=506)	0.3216	3.794	TCGA-WY-A858-01
LGG(N=506)	0.3204	4.3031	TCGA-VM-A8CB-01
LGG(N=506)	0.3315	3.5694	TCGA-VM-A8CF-01
LGG(N=506)	0.3413	3.7367	TCGA-HT-7608-01
LGG(N=506)	0.303	4.1482	TCGA-CS-4938-01
LGG(N=506)	0.3222	3.8905	TCGA-QH-A6X5-01
LGG(N=506)	0.317	4.84	TCGA-DU-8166-01
LGG(N=506)	0.3227	4.8694	TCGA-HT-8018-01
LGG(N=506)	0.2991	4.63	TCGA-DU-7292-01
LGG(N=506)	0.3292	4.0322	TCGA-S9-A6TU-01
LGG(N=506)	0.3294	3.9478	TCGA-DB-A75P-01
LGG(N=506)	0.2903	5.0409	TCGA-FG-6691-01
LGG(N=506)	0.303	4.7597	TCGA-DU-6399-01
LGG(N=506)	0.3264	4.4033	TCGA-S9-A7IQ-01
LGG(N=506)	0.3054	3.9204	TCGA-S9-A6WI-01
LGG(N=506)	0.3057	4.2987	TCGA-DB-A64S-01
LGG(N=506)	0.2976	4.2204	TCGA-FG-6692-01
LGG(N=506)	0.2992	4.2358	TCGA-HW-7489-01
LGG(N=506)	0.3313	4.656	TCGA-R8-A6YH-01
LGG(N=506)	0.311	4.4938	TCGA-HT-A618-01
LGG(N=506)	0.2997	3.9829	TCGA-QH-A65S-01
LGG(N=506)	0.32	4.2899	TCGA-DU-7019-01
LGG(N=506)	0.3345	4.9007	TCGA-DU-A7TJ-01
LGG(N=506)	0.3296	4.5255	TCGA-TM-A84H-01
LGG(N=506)	0.3175	4.2877	TCGA-S9-A7R8-01
LGG(N=506)	0.3098	4.2624	TCGA-S9-A7R4-01
LGG(N=506)	0.3214	4.641	TCGA-S9-A7J3-01
LGG(N=506)	0.3247	4.3292	TCGA-TM-A84L-01
LGG(N=506)	0.3282	4.3632	TCGA-E1-A7YH-01
LGG(N=506)	0.3075	4.5261	TCGA-P5-A5EV-01
LGG(N=506)	0.3146	5.0553	TCGA-DU-A7TD-01
LGG(N=506)	0.3049	4.0046	TCGA-HW-A5KL-01
LGG(N=506)	0.3255	4.3834	TCGA-RY-A83X-01
LGG(N=506)	0.3401	4.9031	TCGA-HT-7687-01
LGG(N=506)	0.3252	4.2009	TCGA-WY-A85A-01
LGG(N=506)	0.2716	4.8385	TCGA-DB-5281-01
LGG(N=506)	0.3297	4.421	TCGA-E1-A7YK-01
LGG(N=506)	0.3018	4.2427	TCGA-DU-A5TU-01
LGG(N=506)	0.2979	4.5802	TCGA-DU-A7TA-01
LGG(N=506)	0.2735	4.862	TCGA-CS-5395-01
LGG(N=506)	0.3198	4.5349	TCGA-TQ-A7RR-01
LGG(N=506)	0.3252	4.1595	TCGA-HT-A5R5-01
LGG(N=506)	0.3081	3.83	TCGA-QH-A65V-01
LGG(N=506)	0.3241	4.3046	TCGA-S9-A6WP-01
LGG(N=506)	0.3013	4.0532	TCGA-S9-A6U5-01
LGG(N=506)	0.321	4.6854	TCGA-E1-A7YO-01
LGG(N=506)	0.3311	4.8625	TCGA-QH-A6X8-01
LGG(N=506)	0.3365	4.7285	TCGA-HT-7610-01
LGG(N=506)	0.3477	4.5687	TCGA-HT-7875-01
LGG(N=506)	0.3192	3.8269	TCGA-R8-A6MK-01
LGG(N=506)	0.3298	4.481	TCGA-P5-A5F0-01
LGG(N=506)	0.3227	4.287	TCGA-R8-A73M-01
LGG(N=506)	0.3057	4.4243	TCGA-S9-A6TS-01
LGG(N=506)	0.3338	3.74	TCGA-S9-A6TW-01
LGG(N=506)	0.2619	3.9002	TCGA-E1-5303-01
LGG(N=506)	0.2975	4.4549	TCGA-HT-7606-01
LGG(N=506)	0.3029	4.4634	TCGA-DU-6408-01
LGG(N=506)	0.2944	4.1946	TCGA-FG-5964-01
LGG(N=506)	0.3118	4.5754	TCGA-DB-A64Q-01
LGG(N=506)	0.3315	4.481	TCGA-S9-A7IZ-01
LGG(N=506)	0.2988	4.096	TCGA-S9-A6WH-01
LGG(N=506)	0.3357	3.866	TCGA-HT-7602-01
LGG(N=506)	0.3299	4.3335	TCGA-DU-A6S8-01
LGG(N=506)	0.3188	4.3972	TCGA-HT-7858-01
LGG(N=506)	0.3097	5.0747	TCGA-HT-7860-01
LGG(N=506)	0.3065	5.2025	TCGA-DU-7006-01
LGG(N=506)	0.2989	4.3321	TCGA-TQ-A7RS-01
LGG(N=506)	0.3058	4.3119	TCGA-DU-7009-01
LGG(N=506)	0.3135	4.8405	TCGA-DU-7010-01
LGG(N=506)	0.3128	4.2892	TCGA-QH-A6X3-01
LGG(N=506)	0.342	4.9575	TCGA-DU-8164-01
LGG(N=506)	0.3024	3.9737	TCGA-DU-7018-01
LGG(N=506)	0.3173	4.3744	TCGA-RY-A843-01
LGG(N=506)	0.3225	3.4437	TCGA-DU-7014-01
LGG(N=506)	0.3422	4.6571	TCGA-HT-7693-01
LGG(N=506)	0.3098	3.3047	TCGA-FG-A6J3-01
LGG(N=506)	0.3186	5.2419	TCGA-HT-8106-01
LGG(N=506)	0.2962	4.6445	TCGA-HT-7472-01
LGG(N=506)	0.333	4.2556	TCGA-HT-7855-01
LGG(N=506)	0.3259	4.8545	TCGA-DB-A4XG-01
LGG(N=506)	0.3144	4.6702	TCGA-HT-A5RC-01
LGG(N=506)	0.3238	4.5318	TCGA-VM-A8C8-01
LGG(N=506)	0.3192	4.4061	TCGA-HT-7681-01
LGG(N=506)	0.3401	4.2684	TCGA-DU-A6S2-01
LGG(N=506)	0.3361	4.0739	TCGA-DU-7309-01
LGG(N=506)	0.3094	3.6219	TCGA-DB-A4XH-01
LGG(N=506)	0.3123	4.3855	TCGA-HT-7485-01
LGG(N=506)	0.3031	4.4162	TCGA-VW-A7QS-01
LGG(N=506)	0.3199	4.1466	TCGA-VV-A86M-01
LGG(N=506)	0.321	4.322	TCGA-E1-A7YV-01
LGG(N=506)	0.3085	4.8778	TCGA-HT-7468-01
LGG(N=506)	0.3353	4.958	TCGA-HT-7677-01
LGG(N=506)	0.3033	4.2616	TCGA-DU-A5TY-01
LGG(N=506)	0.3149	4.2495	TCGA-HT-8109-01
LGG(N=506)	0.3132	3.97	TCGA-HT-7479-01
LGG(N=506)	0.2726	4.4913	TCGA-DB-5275-01
LGG(N=506)	0.3311	4.2389	TCGA-TM-A7C4-01
LGG(N=506)	0.3194	4.449	TCGA-DH-A7UU-01
LGG(N=506)	0.3128	4.2095	TCGA-HT-A4DV-01
LGG(N=506)	0.3213	4.6793	TCGA-FG-8186-01
LGG(N=506)	0.2957	4.6212	TCGA-FG-A4MT-01
LGG(N=506)	0.3067	4.4357	TCGA-E1-5305-01
LGG(N=506)	0.2715	4.1644	TCGA-CS-5393-01
LGG(N=506)	0.2954	4.0799	TCGA-DU-6395-01
LGG(N=506)	0.3072	3.834	TCGA-DB-A64X-01
LGG(N=506)	0.3268	4.3938	TCGA-S9-A7IS-01
LGG(N=506)	0.3203	4.1668	TCGA-HT-7856-01
LGG(N=506)	0.3085	4.0532	TCGA-QH-A6XA-01
LGG(N=506)	0.3201	3.8944	TCGA-P5-A77W-01
LGG(N=506)	0.281	4.5485	TCGA-CS-4942-01
LGG(N=506)	0.2942	4.6657	TCGA-CS-6186-01
LGG(N=506)	0.3056	4.7603	TCGA-DU-7008-01
LGG(N=506)	0.3311	4.5361	TCGA-HT-7688-01
LGG(N=506)	0.3095	4.4196	TCGA-DU-A7T8-01
LGG(N=506)	0.3307	3.6335	TCGA-DU-A6S3-01
LGG(N=506)	0.3034	4.481	TCGA-DB-A64U-01
LGG(N=506)	0.2984	4.4823	TCGA-HT-A61C-01
LGG(N=506)	0.3059	4.1474	TCGA-TQ-A7RF-01
LGG(N=506)	0.3289	4.9041	TCGA-F6-A8O3-01
LGG(N=506)	0.3103	4.2803	TCGA-R8-A6ML-01
LGG(N=506)	0.3051	4.3349	TCGA-DU-A5TT-01
LGG(N=506)	0.3252	4.3031	TCGA-QH-A870-01
LGG(N=506)	0.3276	4.0064	TCGA-DB-A75O-01
LGG(N=506)	0.322	4.6416	TCGA-HT-8111-01
LGG(N=506)	0.3165	4.5342	TCGA-S9-A7QZ-01
LGG(N=506)	0.2724	4.208	TCGA-DB-5273-01
LGG(N=506)	0.3411	4.4926	TCGA-HT-7470-01
LGG(N=506)	0.3172	4.0331	TCGA-FG-A4MY-01
LGG(N=506)	0.3235	4.6838	TCGA-HT-8108-01
LGG(N=506)	0.2953	4.6651	TCGA-DB-A4XE-01
LGG(N=506)	0.3359	3.551	TCGA-HT-A4DS-01
LGG(N=506)	0.345	4.7132	TCGA-DU-8158-01
LGG(N=506)	0.3025	4.4357	TCGA-HT-7474-01
LGG(N=506)	0.2646	4.1523	TCGA-DH-5143-01
LGG(N=506)	0.2963	4.4317	TCGA-TQ-A7RJ-01
LGG(N=506)	0.3143	3.9012	TCGA-S9-A7QY-01
LGG(N=506)	0.306	4.0627	TCGA-DB-A4XA-01
LGG(N=506)	0.3289	4.0653	TCGA-P5-A731-01
LGG(N=506)	0.3292	4.9416	TCGA-E1-A7YE-01
LGG(N=506)	0.3077	4.3126	TCGA-FG-A710-01
LGG(N=506)	0.3236	3.7919	TCGA-HT-8010-01
LGG(N=506)	0.3023	4.4476	TCGA-DU-7299-01
LGG(N=506)	0.2639	4.4463	TCGA-DB-5270-01
LGG(N=506)	0.3322	4.2766	TCGA-KT-A74X-01
LGG(N=506)	0.3292	4.433	TCGA-DB-A75L-01
LGG(N=506)	0.2961	4.4357	TCGA-HT-A616-01
LGG(N=506)	0.3281	3.7971	TCGA-HT-A74K-01
LGG(N=506)	0.3184	4.178	TCGA-WY-A85C-01
LGG(N=506)	0.3307	4.4595	TCGA-FG-8188-01
LGG(N=506)	0.3117	4.7777	TCGA-DU-A6S7-01
LGG(N=506)	0.3004	4.6218	TCGA-DU-7294-01
LGG(N=506)	0.268	2.7139	TCGA-DB-5274-01
LGG(N=506)	0.3542	4.7756	TCGA-HT-7604-01
LGG(N=506)	0.3261	4.131	TCGA-TM-A84F-01
LGG(N=506)	0.3045	4.2381	TCGA-DB-A64O-01
LGG(N=506)	0.3233	4.4263	TCGA-HT-7884-01
LGG(N=506)	0.308	4.2943	TCGA-S9-A6WE-01
LGG(N=506)	0.3068	4.1915	TCGA-QH-A6CY-01
LGG(N=506)	0.3107	4.6866	TCGA-S9-A6WM-01
LGG(N=506)	0.3277	4.9607	TCGA-HT-A5RA-01
LGG(N=506)	0.3116	4.3576	TCGA-QH-A6CV-01
LGG(N=506)	0.315	4.3263	TCGA-VM-A8CE-01
LGG(N=506)	0.2992	4.5336	TCGA-DU-5852-01
LGG(N=506)	0.3156	4.073	TCGA-P5-A72U-01
LGG(N=506)	0.3281	4.3834	TCGA-DB-A75K-01
LGG(N=506)	0.3115	4.4397	TCGA-DU-6410-01
LGG(N=506)	0.3006	4.2072	TCGA-QH-A65Z-01
LGG(N=506)	0.3209	3.8729	TCGA-S9-A7IY-01
LGG(N=506)	0.3122	4.0019	TCGA-P5-A781-01
LGG(N=506)	0.3214	5.0536	TCGA-TM-A84G-01
LGG(N=506)	0.3076	4.3667	TCGA-HW-A5KK-01
LGG(N=506)	0.2577	4.6577	TCGA-E1-5311-01
LGG(N=506)	0.3424	4.9055	TCGA-FG-7634-01
LGG(N=506)	0.2913	4.0653	TCGA-DU-5855-01
LGG(N=506)	0.2915	4.7377	TCGA-DU-6396-01
LGG(N=506)	0.3356	4.2743	TCGA-FG-7643-01
LGG(N=506)	0.3227	4.5392	TCGA-TM-A84C-01
LGG(N=506)	0.3171	4.1684	TCGA-WY-A85E-01
LGG(N=506)	0.3159	4.6474	TCGA-DU-7298-01
LGG(N=506)	0.3181	4.0575	TCGA-TM-A84T-01
LGG(N=506)	0.3339	4.3082	TCGA-FG-7637-01
LGG(N=506)	0.3315	4.2892	TCGA-HT-A5R9-01
LGG(N=506)	0.3017	4.5142	TCGA-HT-A614-01
LGG(N=506)	0.3077	4.1153	TCGA-QH-A65R-01
LGG(N=506)	0.3257	4.4142	TCGA-FG-A60J-01
LGG(N=506)	0.3082	4.8319	TCGA-FG-8189-01
LGG(N=506)	0.295	3.7105	TCGA-P5-A5EY-01
LGG(N=506)	0.3004	4.9769	TCGA-HT-7882-01
LGG(N=506)	0.3254	4.309	TCGA-HT-8011-01
LGG(N=506)	0.2917	4.8125	TCGA-DU-6394-01
LGG(N=506)	0.3152	4.5466	TCGA-WY-A859-01
LGG(N=506)	0.3309	4.6189	TCGA-WY-A85B-01
LGG(N=506)	0.3065	4.6101	TCGA-S9-A6UB-01
LGG(N=506)	0.2982	4.3793	TCGA-S9-A6U6-01
LGG(N=506)	0.3378	5.0317	TCGA-DU-8168-01
LGG(N=506)	0.2983	4.6977	TCGA-DU-7290-01
LGG(N=506)	0.2971	4.4958	TCGA-DU-6407-01
LGG(N=506)	0.3289	4.8038	TCGA-HT-7601-01
LGG(N=506)	0.2843	4.735	TCGA-DU-6403-01
LGG(N=506)	0.3077	4.7121	TCGA-DB-A64R-01
LGG(N=506)	0.3293	4.6938	TCGA-E1-A7YQ-01
LGG(N=506)	0.2937	4.9402	TCGA-DU-6405-01
LGG(N=506)	0.2926	4.1986	TCGA-HW-7487-01
LGG(N=506)	0.3214	4.2033	TCGA-S9-A7R2-01
LGG(N=506)	0.3272	4.6	TCGA-S9-A7J1-01
LGG(N=506)	0.3191	4.2419	TCGA-P5-A72X-01
LGG(N=506)	0.3257	4.7496	TCGA-E1-A7YJ-01
LGG(N=506)	0.3378	4.783	TCGA-HT-7690-01
LGG(N=506)	0.3369	4.4751	TCGA-HT-8105-01
LGG(N=506)	0.3106	4.6236	TCGA-E1-A7YY-01
LGG(N=506)	0.3159	4.6288	TCGA-HT-A619-01
LGG(N=506)	0.2966	4.3786	TCGA-DU-6400-01
LGG(N=506)	0.3204	3.705	TCGA-P5-A737-01
LGG(N=506)	0.3147	4.3349	TCGA-RY-A83Y-01
LGG(N=506)	0.4513	4.906	TCGA-HT-8564-01
LGG(N=506)	0.3197	4.5596	TCGA-HT-7686-01
LGG(N=506)	0.3181	4.1571	TCGA-E1-A7YM-01
LGG(N=506)	0.3079	4.001	TCGA-DH-A66F-01
LGG(N=506)	0.2623	4.5053	TCGA-CS-5390-01
LGG(N=506)	0.2953	5.0657	TCGA-S9-A6UA-01
LGG(N=506)	0.3341	4.9113	TCGA-FG-A87N-01
LGG(N=506)	0.3226	3.9838	TCGA-VV-A829-01
LGG(N=506)	0.3027	4.4615	TCGA-DH-A66B-01
LGG(N=506)	0.3312	4.306	TCGA-HT-A5R7-01
LGG(N=506)	0.3295	4.677	TCGA-CS-5394-01
LGG(N=506)	0.312	4.7861	TCGA-DH-A66D-01
LGG(N=506)	0.3151	4.3653	TCGA-HT-7877-01
LGG(N=506)	0.3062	4.8435	TCGA-DU-6542-01
LGG(N=506)	0.3038	4.3421	TCGA-QH-A6CS-01
LGG(N=506)	0.3198	4.2335	TCGA-E1-A7YU-01
LGG(N=506)	0.3258	4.2899	TCGA-W9-A837-01
LGG(N=506)	0.3523	4.5274	TCGA-IK-7675-01
LGG(N=506)	0.3466	4.1384	TCGA-DU-7306-01
LGG(N=506)	0.3346	4.5559	TCGA-QH-A6X9-01
LGG(N=506)	0.3121	4.9132	TCGA-S9-A6U0-01
LGG(N=506)	0.3385	4.7209	TCGA-HT-7611-01
LGG(N=506)	0.3165	4.1547	TCGA-S9-A6TY-01
LGG(N=506)	0.2925	4.1716	TCGA-DU-A7TB-01
LGG(N=506)	0.3048	4.2526	TCGA-IK-8125-01
LGG(N=506)	0.3211	3.6405	TCGA-WH-A86K-01
LGG(N=506)	0.2583	3.7226	TCGA-DH-5141-01
LGG(N=506)	0.3126	3.7061	TCGA-FG-A60L-01
LGG(N=506)	0.2732	4.859	TCGA-DB-5280-01
LGG(N=506)	0.3186	4.373	TCGA-S9-A7IX-01
LGG(N=506)	0.2951	4.6012	TCGA-FG-5965-01
LGG(N=506)	0.3526	5.2048	TCGA-P5-A5F6-01
LGG(N=506)	0.3159	5.2107	TCGA-DU-7007-01
LGG(N=506)	0.3003	3.9992	TCGA-HW-7490-01
LGG(N=506)	0.3077	4.5675	TCGA-CS-6188-01
LGG(N=506)	0.3029	4.8944	TCGA-CS-6668-01
LGG(N=506)	0.3305	5.3615	TCGA-DU-8165-01
LGG(N=506)	0.3302	3.3076	TCGA-HT-7692-01
LGG(N=506)	0.3073	4.7077	TCGA-TQ-A7RM-01
LGG(N=506)	0.3379	5.1231	TCGA-DU-8161-01
LGG(N=506)	0.331	3.9308	TCGA-P5-A736-01
LGG(N=506)	0.2918	4.1547	TCGA-DU-6401-01
LGG(N=506)	0.3187	3.8095	TCGA-HT-A74H-01
LGG(N=506)	0.3217	4.5236	TCGA-TQ-A7RV-01
LGG(N=506)	0.2932	4.4868	TCGA-HT-7483-01
LGG(N=506)	0.3037	3.9421	TCGA-HT-7620-01
LGG(N=506)	0.3363	4.7735	TCGA-HT-7480-01
LGG(N=506)	0.3264	4.9379	TCGA-S9-A7J0-01
LGG(N=506)	0.325	4.8987	TCGA-TM-A84Q-01
LGG(N=506)	0.3174	3.9534	TCGA-RY-A847-01
LGG(N=506)	0.3177	4.4377	TCGA-TQ-A7RQ-01
LGG(N=506)	0.307	4.8729	TCGA-TQ-A7RW-01
LGG(N=506)	0.3244	3.863	TCGA-FG-8191-01
LGG(N=506)	0.3285	4.5711	TCGA-E1-A7YW-01
LGG(N=506)	0.2659	4.6944	TCGA-DB-5278-01
LGG(N=506)	0.325	4.8817	TCGA-E1-A7YS-01
LGG(N=506)	0.353	4.4108	TCGA-HT-7695-01
LGG(N=506)	0.3339	4.4641	TCGA-DU-7012-01
LGG(N=506)	0.3098	4.6977	TCGA-HT-7879-01
LGG(N=506)	0.3255	3.9232	TCGA-DU-A7TC-01
LGG(N=506)	0.3507	4.0619	TCGA-HT-7680-01
LGG(N=506)	0.3146	4.504	TCGA-DB-A4X9-01
LGG(N=506)	0.324	4.7154	TCGA-TQ-A7RI-01
LGG(N=506)	0.3096	4.3177	TCGA-TM-A7CA-01
LGG(N=506)	0.3124	4.5053	TCGA-QH-A86X-01
LGG(N=506)	0.3275	4.3917	TCGA-DU-A76R-01
LGG(N=506)	0.2628	4.6218	TCGA-DH-5144-01
LGG(N=506)	0.3159	4.5711	TCGA-E1-A7Z2-01
LGG(N=506)	0.3051	4.3292	TCGA-DU-A5TP-01
LGG(N=506)	0.3327	3.8228	TCGA-FG-8187-01
LGG(N=506)	0.2753	4.9002	TCGA-E1-5304-01
LGG(N=506)	0.2751	4.468	TCGA-CS-4943-01
LGG(N=506)	0.2629	4.7725	TCGA-DH-5140-01
LGG(N=506)	0.3249	4.1252	TCGA-TM-A7CF-01
LGG(N=506)	0.2996	4.232	TCGA-DH-A7US-01
LGG(N=506)	0.3194	4.3039	TCGA-HT-A61B-01
LGG(N=506)	0.3107	4.2892	TCGA-E1-A7Z6-01
LGG(N=506)	0.3135	4.8525	TCGA-HT-7857-01
LGG(N=506)	0.3071	4.0985	TCGA-E1-5319-01
LGG(N=506)	0.3178	3.4477	TCGA-DU-A5TS-01
LGG(N=506)	0.5506	5.0709	TCGA-DU-6392-01
LGG(N=506)	0.3199	3.4477	TCGA-QH-A6CU-01
LGG(N=506)	0.2898	4.9232	TCGA-DU-6404-01
LGG(N=506)	0.3289	3.47	TCGA-VW-A8FI-01
LGG(N=506)	0.3207	4.6171	TCGA-HT-A74L-01
LGG(N=506)	0.3157	4.6776	TCGA-P5-A5EU-01
LGG(N=506)	0.3087	3.492	TCGA-P5-A5EZ-01
LGG(N=506)	0.3042	4.0636	TCGA-S9-A89Z-01
LGG(N=506)	0.3258	4.6921	TCGA-S9-A6TZ-01
LGG(N=506)	0.2997	4.6177	TCGA-FG-5963-01
LGG(N=506)	0.307	4.2914	TCGA-HT-A61A-01
LGG(N=506)	0.3258	4.6195	TCGA-S9-A89V-01
LGG(N=506)	0.3127	4.5832	TCGA-DB-A64W-01
LGG(N=506)	0.2943	2.8681	TCGA-FG-A4MX-01
LGG(N=506)	0.3185	4.9915	TCGA-P5-A72Z-01
LGG(N=506)	0.3168	4.8699	TCGA-HT-8114-01
LGG(N=506)	0.323	4.3855	TCGA-HT-7881-01
LGG(N=506)	0.2697	3.4183	TCGA-CS-4944-01
LGG(N=506)	0.3129	3.9654	TCGA-S9-A7QX-01
LGG(N=506)	0.3196	4.0549	TCGA-DU-A7TG-01
LGG(N=506)	0.3014	4.7022	TCGA-DU-5874-01
LGG(N=506)	0.3362	4.5047	TCGA-TQ-A8XE-01
LGG(N=506)	0.3353	4.3299	TCGA-DU-7300-01
LGG(N=506)	0.3431	4.3896	TCGA-HT-7694-01
LGG(N=506)	0.3498	4.926	TCGA-HT-7471-01
LGG(N=506)	0.3121	4.6077	TCGA-DB-A4XD-01
LGG(N=506)	0.3029	4.4074	TCGA-TQ-A7RK-01
LGG(N=506)	0.3106	4.1523	TCGA-HT-7475-01
LGG(N=506)	0.3066	4.8934	TCGA-TQ-A7RO-01
LGG(N=506)	0.3317	4.6247	TCGA-HT-7902-01
LGG(N=506)	0.2984	4.3463	TCGA-FG-A711-01
LGG(N=506)	0.2762	4.5091	TCGA-DB-5276-01
LGG(N=506)	0.3176	3.7741	TCGA-P5-A730-01
LGG(N=506)	0.3261	4.8213	TCGA-E1-A7YD-01
LGG(N=506)	0.3228	3.9874	TCGA-HT-A74O-01
LGG(N=506)	0.3105	4.511	TCGA-HT-8015-01
LGG(N=506)	0.3272	4.9769	TCGA-HT-A74J-01
LGG(N=506)	0.323	4.2427	TCGA-DH-A669-01
LGG(N=506)	0.3049	4.3256	TCGA-HT-A617-01
LGG(N=506)	0.3393	4.1636	TCGA-HT-7605-01
LGG(N=506)	0.3207	4.5946	TCGA-S9-A6WO-01
LGG(N=506)	0.3271	3.867	TCGA-QH-A6CX-01
LGG(N=506)	0.3366	4.2624	TCGA-P5-A5F4-01
LGG(N=506)	0.3053	4.2266	TCGA-DU-A76K-01
LGG(N=506)	0.3204	4.3744	TCGA-VM-A8CH-01
LGG(N=506)	0.3513	4.2541	TCGA-HT-7609-01
LGG(N=506)	0.3233	4.4047	TCGA-QH-A6X4-01
LGG(N=506)	0.3082	4.2676	TCGA-DH-A7UV-01
LGG(N=506)	0.3229	3.8729	TCGA-TM-A7C3-01
LGG(N=506)	0.3054	4.3342	TCGA-S9-A6WG-01
LGG(N=506)	0.3072	4.3827	TCGA-FG-6690-01
LGG(N=506)	0.3418	3.9337	TCGA-DU-8167-01
LGG(N=506)	0.3232	4.222	TCGA-QH-A65X-01
LGG(N=506)	0.3274	3.8471	TCGA-P5-A780-01
LGG(N=506)	0.2649	4.641	TCGA-E1-5302-01
LGG(N=506)	0.3105	2.9618	TCGA-HW-A5KJ-01
LGG(N=506)	0.3072	4.3356	TCGA-R8-A6MO-01
LGG(N=506)	0.3321	4.1466	TCGA-FG-7636-01
LGG(N=506)	0.2888	4.1539	TCGA-CS-6290-01
LGG(N=506)	0.2986	4.2862	TCGA-DU-5847-01
LGG(N=506)	0.3013	5.1339	TCGA-DU-6406-01
LGG(N=506)	0.3428	4.9524	TCGA-TM-A84B-01
CESC(N=302)	0.3075	4.4628	TCGA-EK-A2RE-01
CESC(N=302)	0.2696	5.8795	TCGA-IR-A3L7-01
CESC(N=302)	0.3347	4.5748	TCGA-Q1-A73Q-01
CESC(N=302)	0.2893	2.3704	TCGA-C5-A1MF-01
CESC(N=302)	0.3614	4.4654	TCGA-ZJ-A8QQ-01
CESC(N=302)	0.3165	5.4013	TCGA-EX-A3L1-01
CESC(N=302)	0.3032	5.4165	TCGA-JW-A5VI-01
CESC(N=302)	0.3046	4.8012	TCGA-EA-A1QT-01
CESC(N=302)	0.3275	4.5723	TCGA-UC-A7PG-01
CESC(N=302)	0.3389	6.3216	TCGA-EA-A97N-01
CESC(N=302)	0.3074	4.2773	TCGA-EA-A3QD-01
CESC(N=302)	0.2908	3.7017	TCGA-C5-A1ME-01
CESC(N=302)	0.3465	5.4722	TCGA-C5-A8YR-01
CESC(N=302)	0.2933	4.5161	TCGA-FU-A40J-01
CESC(N=302)	0.3227	4.8228	TCGA-VS-A9V5-01
CESC(N=302)	0.3546	5.433	TCGA-MY-A913-01
CESC(N=302)	0.3291	5.602	TCGA-VS-A8Q9-01
CESC(N=302)	0.2782	5.511	TCGA-DS-A0VL-01
CESC(N=302)	0.3285	4.2877	TCGA-VS-A9UU-01
CESC(N=302)	0.3375	5.0858	TCGA-ZJ-AAXN-01
CESC(N=302)	0.5605	5.235	TCGA-VS-A9U6-01
CESC(N=302)	0.3206	3.8075	TCGA-C5-A2LX-01
CESC(N=302)	0.2954	4.1094	TCGA-C5-A1M8-01
CESC(N=302)	0.3296	4.8022	TCGA-C5-A7CJ-01
CESC(N=302)	0.3659	5.5053	TCGA-GH-A9DA-01
CESC(N=302)	0.305	3.5875	TCGA-EA-A5O9-01
CESC(N=302)	0.3348	4.9951	TCGA-Q1-A73P-01
CESC(N=302)	0.335	4.9621	TCGA-C5-A8XK-01
CESC(N=302)	0.3693	5.1161	TCGA-C5-A907-01
CESC(N=302)	0.3302	3.7475	TCGA-VS-A9UD-01
CESC(N=302)	0.3387	3.8798	TCGA-C5-A7CM-01
CESC(N=302)	0.357	4.9007	TCGA-VS-A9V2-01
CESC(N=302)	0.3511	4.9561	TCGA-VS-A94Y-01
CESC(N=302)	0.3665	5.0816	TCGA-C5-A8ZZ-01
CESC(N=302)	0.6007	6.0736	TCGA-VS-A9UJ-01
CESC(N=302)	0.3363	3.5073	TCGA-ZJ-AAXI-01
CESC(N=302)	0.3322	4.9402	TCGA-Q1-A6DT-01
CESC(N=302)	0.3205	5.6789	TCGA-VS-A9UQ-01
CESC(N=302)	0.3384	4.5934	TCGA-VS-A8EG-01
CESC(N=302)	0.3416	5.0679	TCGA-EX-A69L-01
CESC(N=302)	0.3415	5.4845	TCGA-Q1-A73O-01
CESC(N=302)	0.3742	4.3702	TCGA-VS-A8QC-01
CESC(N=302)	0.2973	4.9199	TCGA-EA-A5ZE-01
CESC(N=302)	0.3489	4.579	TCGA-ZJ-A8QO-01
CESC(N=302)	0.2794	3.4224	TCGA-JX-A5QV-01
CESC(N=302)	0.2876	4.1764	TCGA-EK-A2GZ-01
CESC(N=302)	0.3074	4.0287	TCGA-EK-A2R9-01
CESC(N=302)	0.2757	3.1327	TCGA-IR-A3LL-01
CESC(N=302)	0.2847	4.248	TCGA-C5-A1M5-01
CESC(N=302)	0.3285	4.2404	TCGA-C5-A7X8-01
CESC(N=302)	0.5382	5.1132	TCGA-EA-A3HS-01
CESC(N=302)	0.3014	4.7033	TCGA-IR-A3LH-01
CESC(N=302)	0.2925	5.0631	TCGA-C5-A1M9-01
CESC(N=302)	0.3112	1.2147	TCGA-DG-A2KJ-01
CESC(N=302)	0.2933	3.5187	TCGA-Q1-A5R3-01
CESC(N=302)	0.3047	4.7919	TCGA-HG-A2PA-01
CESC(N=302)	0.2901	4.1498	TCGA-EA-A50E-01
CESC(N=302)	0.2958	4.1883	TCGA-EA-A556-01
CESC(N=302)	0.3211	4.9079	TCGA-VS-A9V3-01
CESC(N=302)	0.3232	4.843	TCGA-VS-A9UH-01
CESC(N=302)	0.2881	4.8141	TCGA-JX-A3PZ-01
CESC(N=302)	0.2969	3.9356	TCGA-C5-A1MP-01
CESC(N=302)	0.3643	5.1081	TCGA-MU-A5YI-01
CESC(N=302)	0.3317	5.193	TCGA-VS-A8QA-01
CESC(N=302)	0.2933	5.3313	TCGA-FU-A5XV-01
CESC(N=302)	0.3553	3.7846	TCGA-EX-A8YF-01
CESC(N=302)	0.3477	5.4793	TCGA-ZJ-A8QR-01
CESC(N=302)	0.2895	3.7783	TCGA-IR-A3LB-01
CESC(N=302)	0.3039	4.0549	TCGA-EK-A2PI-01
CESC(N=302)	0.3278	4.4784	TCGA-HM-A6W2-01
CESC(N=302)	0.3012	4.6832	TCGA-IR-A3LF-01
CESC(N=302)	0.3003	4.4337	TCGA-HM-A4S6-01
CESC(N=302)	0.3523	4.734	TCGA-VS-A8QF-01
CESC(N=302)	0.3141	5.2608	TCGA-VS-AA62-01
CESC(N=302)	0.3301	3.5596	TCGA-C5-A7UE-01
CESC(N=302)	0.3085	4.2442	TCGA-DS-A5RQ-01
CESC(N=302)	0.2866	4.2227	TCGA-BI-A20A-01
CESC(N=302)	0.4804	4.1019	TCGA-EA-A3HU-01
CESC(N=302)	0.3052	5.5814	TCGA-EK-A2RM-01
CESC(N=302)	0.2818	5.281	TCGA-DG-A2KK-01
CESC(N=302)	0.3109	5.9284	TCGA-C5-A1MI-01
CESC(N=302)	0.3342	2.9507	TCGA-JW-A852-01
CESC(N=302)	0.3202	4.2526	TCGA-EK-A2RA-01
CESC(N=302)	0.3	4.1335	TCGA-EK-A2RB-01
CESC(N=302)	0.2916	4.6972	TCGA-C5-A1MJ-01
CESC(N=302)	0.2937	3.5911	TCGA-MY-A5BE-01
CESC(N=302)	0.2796	4.6247	TCGA-C5-A1BE-01
CESC(N=302)	0.3333	5.0108	TCGA-ZJ-AAXT-01
CESC(N=302)	0.3289	3.3492	TCGA-LP-A7HU-01
CESC(N=302)	0.6087	4.7929	TCGA-2W-A8YY-01
CESC(N=302)	0.2726	5.6144	TCGA-EA-A411-01
CESC(N=302)	0.305	5.7963	TCGA-C5-A1MN-01
CESC(N=302)	0.3151	5.2335	TCGA-C5-A2M2-01
CESC(N=302)	0.3035	4.2056	TCGA-EK-A2PK-01
CESC(N=302)	0.9845	3.981	TCGA-EA-A410-01
CESC(N=302)	0.3351	5.4236	TCGA-VS-A952-01
CESC(N=302)	0.2902	3.8591	TCGA-EK-A2IP-01
CESC(N=302)	0.326	4.0969	TCGA-EK-A2PG-01
CESC(N=302)	0.2853	4.3786	TCGA-FU-A3YQ-01
CESC(N=302)	0.3318	3.3979	TCGA-DS-A1OB-01
CESC(N=302)	0.3262	4.9556	TCGA-VS-A959-01
CESC(N=302)	0.3033	4.5485	TCGA-EK-A2R7-01
CESC(N=302)	0.2806	5.0068	TCGA-JW-A5VJ-01
CESC(N=302)	0.3271	4.7033	TCGA-C5-A7UH-01
CESC(N=302)	0.3356	5.1942	TCGA-MA-AA3Z-01
CESC(N=302)	0.3293	4.3876	TCGA-VS-A9UR-01
CESC(N=302)	0.2911	4.5374	TCGA-EK-A3GN-01
CESC(N=302)	0.3092	2.5011	TCGA-DS-A3LQ-01
CESC(N=302)	0.3135	4.9454	TCGA-ZJ-AAXU-01
CESC(N=302)	0.3393	4.4887	TCGA-VS-A9UY-01
CESC(N=302)	0.338	5.7263	TCGA-ZJ-AAXA-01
CESC(N=302)	0.2987	4.3068	TCGA-EK-A2RO-01
CESC(N=302)	0.2799	5.0045	TCGA-DS-A0VM-01
CESC(N=302)	0.2994	5.1098	TCGA-EX-A1H5-01
CESC(N=302)	0.2869	3.0944	TCGA-FU-A3EO-01
CESC(N=302)	0.2842	3.6474	TCGA-EK-A2RK-01
CESC(N=302)	0.2885	4.5898	TCGA-C5-A1BL-01
CESC(N=302)	0.3415	4.2921	TCGA-Q1-A73S-01
CESC(N=302)	0.3559	5.2754	TCGA-PN-A8MA-01
CESC(N=302)	0.3273	3.9204	TCGA-DS-A7WF-01
CESC(N=302)	0.323	4.9824	TCGA-C5-A7X3-01
CESC(N=302)	0.2708	4.4732	TCGA-HM-A3JK-01
CESC(N=302)	0.3354	3.1572	TCGA-ZJ-AAXJ-01
CESC(N=302)	0.3263	5.014	TCGA-VS-A9V1-01
CESC(N=302)	0.3043	4.2204	TCGA-FU-A3HZ-01
CESC(N=302)	0.3311	3.7367	TCGA-EA-A78R-01
CESC(N=302)	0.2888	5.22	TCGA-JW-A5VG-01
CESC(N=302)	0.3483	4.5826	TCGA-VS-A9UV-01
CESC(N=302)	0.3144	4.9978	TCGA-C5-A8YT-01
CESC(N=302)	0.329	5.1065	TCGA-ZX-AA5X-01
CESC(N=302)	0.3275	4.0497	TCGA-VS-A958-01
CESC(N=302)	0.3536	4.3456	TCGA-VS-A8EL-01
CESC(N=302)	0.3384	4.6035	TCGA-ZJ-AB0I-01
CESC(N=302)	0.2977	4.6201	TCGA-C5-A2LZ-01
CESC(N=302)	0.3249	5.2114	TCGA-VS-A950-01
CESC(N=302)	0.3007	5.0717	TCGA-IR-A3LK-01
CESC(N=302)	0.3283	5.6879	TCGA-DS-A1OC-01
CESC(N=302)	0.3057	4.2578	TCGA-C5-A3HE-01
CESC(N=302)	0.3341	4.5454	TCGA-MA-AA3W-01
CESC(N=302)	0.3387	4.7372	TCGA-VS-A9UL-01
CESC(N=302)	0.3477	3.7762	TCGA-VS-A9UO-01
CESC(N=302)	0.3389	5.4867	TCGA-C5-A8XJ-01
CESC(N=302)	0.3359	4.5723	TCGA-C5-A7CL-01
CESC(N=302)	0.2968	5.195	TCGA-FU-A3NI-01
CESC(N=302)	0.3028	4.9575	TCGA-EA-A439-01
CESC(N=302)	0.3468	4.8405	TCGA-VS-A9V0-01
CESC(N=302)	0.2764	5.0023	TCGA-EK-A3GK-01
CESC(N=302)	0.3429	4.4364	TCGA-C5-A7CG-01
CESC(N=302)	0.2798	4.3917	TCGA-C5-A1BI-01
CESC(N=302)	0.2825	5.7522	TCGA-HM-A3JJ-01
CESC(N=302)	0.3423	3.0376	TCGA-C5-A7UI-01
CESC(N=302)	0.3529	5.7326	TCGA-ZJ-AAXD-01
CESC(N=302)	0.3001	4.347	TCGA-EK-A2R8-01
CESC(N=302)	0.3444	5.3681	TCGA-VS-A9UP-01
CESC(N=302)	0.2826	4.402	TCGA-C5-A1BF-01
CESC(N=302)	0.3311	3.6382	TCGA-EX-A69M-01
CESC(N=302)	0.2864	4.9524	TCGA-EA-A5ZD-01
CESC(N=302)	0.2909	4.8575	TCGA-JX-A3Q0-01
CESC(N=302)	0.2912	4.7214	TCGA-BI-A0VS-01
CESC(N=302)	0.3713	3.9487	TCGA-VS-A8EJ-01
CESC(N=302)	0.2868	5.3975	TCGA-DR-A0ZL-01
CESC(N=302)	0.3372	4.4951	TCGA-MA-AA41-01
CESC(N=302)	0.2927	5.5311	TCGA-EA-A3HQ-01
CESC(N=302)	0.2784	3.3321	TCGA-LP-A5U2-01
CESC(N=302)	0.2851	4.9069	TCGA-EA-A43B-01
CESC(N=302)	0.3026	4.565	TCGA-C5-A3HD-01
CESC(N=302)	0.29	3.6759	TCGA-IR-A3LI-01
CESC(N=302)	0.3408	4.852	TCGA-VS-A8EI-01
CESC(N=302)	0.2828	3.9478	TCGA-EA-A4BA-01
CESC(N=302)	0.291	4.7485	TCGA-C5-A3HL-01
CESC(N=302)	0.3042	3.6748	TCGA-EA-A3Y4-01
CESC(N=302)	0.3284	4.3328	TCGA-UC-A7PF-01
CESC(N=302)	0.3529	5.2258	TCGA-VS-A9UB-01
CESC(N=302)	0.3359	5.0313	TCGA-UC-A7PI-01
CESC(N=302)	0.3022	4.8141	TCGA-DG-A2KL-01
CESC(N=302)	0.3434	4.8279	TCGA-JW-AAVH-01
CESC(N=302)	0.3057	2.7379	TCGA-MY-A5BF-01
CESC(N=302)	0.2729	5.0117	TCGA-Q1-A5R1-01
CESC(N=302)	0.3062	4.3378	TCGA-FU-A57G-01
CESC(N=302)	0.2941	4.2758	TCGA-C5-A1BQ-01
CESC(N=302)	0.2966	4.986	TCGA-EK-A2PL-01
CESC(N=302)	0.3345	4.5522	TCGA-Q1-A6DW-01
CESC(N=302)	0.3047	4.3951	TCGA-C5-A2M1-01
CESC(N=302)	0.3338	4.182	TCGA-R2-A69V-01
CESC(N=302)	0.3186	6.191	TCGA-EA-A5ZF-01
CESC(N=302)	0.3109	5.8125	TCGA-FU-A23L-01
CESC(N=302)	0.3141	4.2781	TCGA-DS-A1OA-01
CESC(N=302)	0.2826	5.1048	TCGA-EK-A2H1-01
CESC(N=302)	0.2768	4.2795	TCGA-LP-A4AU-01
CESC(N=302)	0.3445	4.1417	TCGA-VS-A9U7-01
CESC(N=302)	0.2856	4.3306	TCGA-C5-A2LS-01
CESC(N=302)	0.335	4.8202	TCGA-MA-AA3Y-01
CESC(N=302)	0.2812	4.5299	TCGA-DG-A2KM-01
CESC(N=302)	0.2906	4.8699	TCGA-C5-A3HF-01
CESC(N=302)	0.3178	4.8763	TCGA-C5-A2LT-01
CESC(N=302)	0.2916	3.7741	TCGA-C5-A1BK-01
CESC(N=302)	0.3306	5.4842	TCGA-UC-A7PD-01
CESC(N=302)	0.2969	4.9542	TCGA-MY-A5BD-01
CESC(N=302)	0.3106	5.0184	TCGA-VS-A9UZ-01
CESC(N=302)	0.3151	4.944	TCGA-DS-A1OD-01
CESC(N=302)	0.3462	4.4881	TCGA-C5-A8XH-01
CESC(N=302)	0.2927	4.8028	TCGA-EK-A2RC-01
CESC(N=302)	0.2921	4.1343	TCGA-JX-A3Q8-01
CESC(N=302)	0.3077	5.3292	TCGA-JW-A5VL-01
CESC(N=302)	0.3368	4.2884	TCGA-DS-A7WI-01
CESC(N=302)	0.3464	3.3966	TCGA-VS-A953-01
CESC(N=302)	0.2845	4.5577	TCGA-EA-A44S-01
CESC(N=302)	0.3346	4.9364	TCGA-VS-A957-01
CESC(N=302)	0.294	4.5473	TCGA-JW-A5VH-01
CESC(N=302)	0.2824	4.4615	TCGA-EA-A3HR-01
CESC(N=302)	0.2928	4.7038	TCGA-EA-A3QE-01
CESC(N=302)	0.3433	5.0365	TCGA-WL-A834-01
CESC(N=302)	0.3561	4.0375	TCGA-C5-A901-01
CESC(N=302)	0.3368	4.4257	TCGA-JW-A69B-01
CESC(N=302)	0.2765	5.4549	TCGA-FU-A3HY-01
CESC(N=302)	0.2943	5.2694	TCGA-C5-A1M6-01
CESC(N=302)	0.3238	3.8431	TCGA-VS-A9V4-01
CESC(N=302)	0.3397	3.29	TCGA-VS-A8Q8-01
CESC(N=302)	0.2834	4.1002	TCGA-DS-A0VN-01
CESC(N=302)	0.3113	4.0091	TCGA-MU-A8JM-01
CESC(N=302)	0.3009	3.6184	TCGA-C5-A2LY-01
CESC(N=302)	0.3104	2.6828	TCGA-FU-A23K-01
CESC(N=302)	0.3345	5.5088	TCGA-EA-A6QX-01
CESC(N=302)	0.3416	4.9113	TCGA-C5-A7CH-01
CESC(N=302)	0.3084	3.4687	TCGA-EK-A2RN-01
CESC(N=302)	0.3104	3.8571	TCGA-EK-A2RJ-01
CESC(N=302)	0.2903	4.2165	TCGA-C5-A1BM-01
CESC(N=302)	0.3366	4.4771	TCGA-Q1-A73R-01
CESC(N=302)	0.3269	4.9002	TCGA-DS-A7WH-01
CESC(N=302)	0.3559	4.6212	TCGA-ZJ-AAX4-01
CESC(N=302)	0.3476	4.9045	TCGA-C5-A7CK-01
CESC(N=302)	0.346	5.6713	TCGA-VS-A8EK-01
CESC(N=302)	0.2805	5.4293	TCGA-EA-A1QS-01
CESC(N=302)	0.2922	4.5386	TCGA-FU-A3WB-01
CESC(N=302)	0.2898	4.9346	TCGA-FU-A3TQ-01
CESC(N=302)	0.3397	4.6877	TCGA-C5-A8XI-01
CESC(N=302)	0.3042	4.8319	TCGA-C5-A1BN-01
CESC(N=302)	0.293	4.0696	TCGA-IR-A3LA-01
CESC(N=302)	0.3591	4.6742	TCGA-VS-A94X-01
CESC(N=302)	0.4485	4.6381	TCGA-MA-AA42-01
CESC(N=302)	0.3527	5.1186	TCGA-C5-A8YQ-01
CESC(N=302)	0.3294	4.6944	TCGA-ZJ-AB0H-01
CESC(N=302)	0.3404	4.3191	TCGA-C5-A7X5-01
CESC(N=302)	0.3241	5.126	TCGA-VS-A9U5-01
CESC(N=302)	0.2778	4.6445	TCGA-C5-A1M7-01
CESC(N=302)	0.3611	4.734	TCGA-C5-A905-01
CESC(N=302)	0.3147	3.5047	TCGA-Q1-A5R2-01
CESC(N=302)	0.2902	4.1044	TCGA-EK-A3GJ-01
CESC(N=302)	0.288	4.734	TCGA-MU-A51Y-01
CESC(N=302)	0.2972	4.8314	TCGA-DG-A2KH-01
CESC(N=302)	0.3434	5.1429	TCGA-VS-A8EB-01
CESC(N=302)	0.2771	4.7645	TCGA-LP-A4AX-01
CESC(N=302)	0.4907	5.4496	TCGA-VS-A94Z-01
CESC(N=302)	0.3555	3.2405	TCGA-ZJ-AAXB-01
CESC(N=302)	0.3048	3.8461	TCGA-C5-A1MQ-01
CESC(N=302)	0.2887	3.2158	TCGA-EX-A1H6-01
CESC(N=302)	0.315	4.8846	TCGA-ZJ-AAXF-01
CESC(N=302)	0.3413	5.2068	TCGA-VS-A9UM-01
CESC(N=302)	0.3418	4.6491	TCGA-VS-A8EH-01
CESC(N=302)	0.2814	4.3421	TCGA-BI-A0VR-01
CESC(N=302)	0.267	4.7688	TCGA-EA-A5FO-01
CESC(N=302)	0.2744	2.9948	TCGA-DR-A0ZM-01
CESC(N=302)	0.3279	4.281	TCGA-MA-AA43-01
CESC(N=302)	0.3115	5.9286	TCGA-C5-A7UC-01
CESC(N=302)	0.3344	5.6097	TCGA-C5-A7XC-01
CESC(N=302)	0.3403	4.9924	TCGA-VS-A8QH-01
CESC(N=302)	0.2845	5.5311	TCGA-LP-A5U3-01
CESC(N=302)	0.2917	4.7307	TCGA-EA-A3HT-01
CESC(N=302)	0.2742	4.2196	TCGA-IR-A3LC-01
CESC(N=302)	0.3294	4.9924	TCGA-FU-A770-01
CESC(N=302)	0.3385	4.1128	TCGA-VS-A8EC-01
CESC(N=302)	0.3319	5.5069	TCGA-4J-AA1J-01
CESC(N=302)	0.269	2.1925	TCGA-LP-A4AV-01
CESC(N=302)	0.3072	4.863	TCGA-EK-A2RL-01
CESC(N=302)	0.2877	4.1392	TCGA-EK-A3GM-01
CESC(N=302)	0.3176	4.0436	TCGA-VS-A9UC-01
CESC(N=302)	0.3019	4.4283	TCGA-FU-A2QG-01
CESC(N=302)	0.3135	3.6872	TCGA-EK-A2PM-01
CESC(N=302)	0.2758	5.824	TCGA-DS-A0VK-01
CESC(N=302)	0.358	4.8851	TCGA-VS-A94W-01
CESC(N=302)	0.2817	4.2773	TCGA-C5-A1MK-01
CESC(N=302)	0.3019	4.8861	TCGA-C5-A1MH-01
CESC(N=302)	0.3062	4.5856	TCGA-C5-A0TN-01
CESC(N=302)	0.3375	4.8319	TCGA-VS-A9UI-01
CESC(N=302)	0.2909	3.7518	TCGA-FU-A3TX-01
CESC(N=302)	0.3326	4.9218	TCGA-Q1-A6DV-01
CESC(N=302)	0.296	4.1587	TCGA-C5-A1ML-01
CESC(N=302)	0.3606	5.0777	TCGA-VS-A8QM-01
CESC(N=302)	0.3265	5.2616	TCGA-RA-A741-01
CESC(N=302)	0.3156	3.7846	TCGA-VS-A954-01
CESC(N=302)	0.3309	5.2687	TCGA-XS-A8TJ-01
CESC(N=302)	0.2932	4.8028	TCGA-LP-A4AW-01
CESC(N=302)	0.3161	3.4958	TCGA-JW-A5VK-01
CESC(N=302)	0.2946	4.2586	TCGA-EK-A2H0-01
CESC(N=302)	0.2971	4.7312	TCGA-EX-A449-01
CESC(N=302)	0.3654	4.174	TCGA-C5-A902-01
CESC(N=302)	0.3388	5.0558	TCGA-MA-AA3X-01
CESC(N=302)	0.3522	4.2646	TCGA-C5-A7CO-01
CESC(N=302)	0.3216	4.1604	TCGA-C5-A2LV-01
CESC(N=302)	0.3406	4.8064	TCGA-VS-A9UT-01
CESC(N=302)	0.3246	5.1392	TCGA-ZJ-AAX8-01
CESC(N=302)	0.2788	5.079	TCGA-C5-A1BJ-01
LUAD(N=511)	0.3067	5.0374	TCGA-44-6778-01
LUAD(N=511)	0.291	3.9002	TCGA-05-4420-01
LUAD(N=511)	0.3127	5.6823	TCGA-64-1679-01
LUAD(N=511)	0.2967	4.4751	TCGA-49-6744-01
LUAD(N=511)	0.2939	5.8112	TCGA-55-6982-01
LUAD(N=511)	0.3335	5.2832	TCGA-NJ-A4YI-01
LUAD(N=511)	0.2944	5.2396	TCGA-73-4666-01
LUAD(N=511)	0.3314	5.1098	TCGA-MN-A4N1-01
LUAD(N=511)	0.3558	4.7746	TCGA-55-7911-01
LUAD(N=511)	0.335	5.7068	TCGA-55-A4DG-01
LUAD(N=511)	0.3419	4.7474	TCGA-L9-A5IP-01
LUAD(N=511)	0.2984	5.1473	TCGA-73-4662-01
LUAD(N=511)	0.3013	5.096	TCGA-55-6712-01
LUAD(N=511)	0.2731	5.4916	TCGA-97-7553-01
LUAD(N=511)	0.3338	5.6848	TCGA-49-AARE-01
LUAD(N=511)	0.3409	4.7528	TCGA-50-8460-01
LUAD(N=511)	0.2962	5.3431	TCGA-50-5933-01
LUAD(N=511)	0.2954	4.8714	TCGA-44-6774-01
LUAD(N=511)	0.2934	4.3834	TCGA-73-4670-01
LUAD(N=511)	0.3062	4.0909	TCGA-55-A48Z-01
LUAD(N=511)	0.3033	4.0383	TCGA-75-7031-01
LUAD(N=511)	0.3226	5.2126	TCGA-44-A47A-01
LUAD(N=511)	0.3117	4.5224	TCGA-05-4398-01
LUAD(N=511)	0.2811	4.5528	TCGA-67-3773-01
LUAD(N=511)	0.2985	4.2281	TCGA-64-5781-01
LUAD(N=511)	0.3059	5.9858	TCGA-97-7552-01
LUAD(N=511)	0.3164	5.1571	TCGA-49-AARN-01
LUAD(N=511)	0.2725	4.7356	TCGA-44-3919-01
LUAD(N=511)	0.3283	3.8621	TCGA-99-8032-01
LUAD(N=511)	0.329	4.9846	TCGA-55-8299-01
LUAD(N=511)	0.3009	4.5355	TCGA-55-A491-01
LUAD(N=511)	0.3005	5.0126	TCGA-50-6595-01
LUAD(N=511)	0.3285	4.2041	TCGA-95-A4VP-01
LUAD(N=511)	0.3126	5.5192	TCGA-55-8302-01
LUAD(N=511)	0.2866	3.24602	TCGA-44-4112-01
LUAD(N=511)	0.2825	4.838	TCGA-05-4430-01
LUAD(N=511)	0.3008	5.2994	TCGA-75-7027-01
LUAD(N=511)	0.2747	4.63775	TCGA-44-2668-01
LUAD(N=511)	0.3629	4.7377	TCGA-55-8507-01
LUAD(N=511)	0.3148	5.9432	TCGA-69-8254-01
LUAD(N=511)	0.323	5.9565	TCGA-78-8640-01
LUAD(N=511)	0.351	5.1065	TCGA-69-7979-01
LUAD(N=511)	0.3036	6.0989	TCGA-55-7573-01
LUAD(N=511)	0.2991	3.3717	TCGA-49-4506-01
LUAD(N=511)	0.2803	4.8345	TCGA-05-4402-01
LUAD(N=511)	0.3525	4.499	TCGA-44-8119-01
LUAD(N=511)	0.3507	4.865	TCGA-55-7724-01
LUAD(N=511)	0.3029	6.0858	TCGA-44-6776-01
LUAD(N=511)	0.3006	3.741	TCGA-49-4514-01
LUAD(N=511)	0.2819	5.5429	TCGA-05-4396-01
LUAD(N=511)	0.3441	5.3388	TCGA-55-8204-01
LUAD(N=511)	0.3258	5.4216	TCGA-L4-A4E6-01
LUAD(N=511)	0.2866	5.22	TCGA-75-6205-01
LUAD(N=511)	0.3242	4.4739	TCGA-62-A46O-01
LUAD(N=511)	0.3151	5.0803	TCGA-78-7155-01
LUAD(N=511)	0.3272	4.9002	TCGA-62-A472-01
LUAD(N=511)	0.3064	4.9955	TCGA-NJ-A55R-01
LUAD(N=511)	0.3261	5.4077	TCGA-62-8395-01
LUAD(N=511)	0.4503	4.3709	TCGA-95-7567-01
LUAD(N=511)	0.3028	4.2025	TCGA-50-5051-01
LUAD(N=511)	0.3259	4.7242	TCGA-55-A48Y-01
LUAD(N=511)	0.3277	5.7581	TCGA-86-A456-01
LUAD(N=511)	0.3108	2.8622	TCGA-50-5068-01
LUAD(N=511)	0.3278	5.4253	TCGA-NJ-A55A-01
LUAD(N=511)	0.32	5.4624	TCGA-J2-A4AG-01
LUAD(N=511)	0.3071	4.9672	TCGA-05-4405-01
LUAD(N=511)	0.2843	5.4407	TCGA-50-5944-01
LUAD(N=511)	0.3329	4.7762	TCGA-86-7955-01
LUAD(N=511)	0.2908	5.8468	TCGA-50-6673-01
LUAD(N=511)	0.3554	5.2072	TCGA-55-7727-01
LUAD(N=511)	0.3384	5.1887	TCGA-55-8510-01
LUAD(N=511)	0.3315	4.0118	TCGA-MP-A4T8-01
LUAD(N=511)	0.341	6.1871	TCGA-86-8279-01
LUAD(N=511)	0.3189	5.3067	TCGA-55-A494-01
LUAD(N=511)	0.3142	2.93469	TCGA-44-3917-01
LUAD(N=511)	0.3003	4.728	TCGA-75-5125-01
LUAD(N=511)	0.3269	4.1587	TCGA-55-8615-01
LUAD(N=511)	0.3514	5.658	TCGA-MP-A4TF-01
LUAD(N=511)	0.2926	4.1294	TCGA-55-6979-01
LUAD(N=511)	0.5047	3.8778	TCGA-86-A4JF-01
LUAD(N=511)	0.3447	4.4067	TCGA-86-7701-01
LUAD(N=511)	0.3196	5.5747	TCGA-62-8398-01
LUAD(N=511)	0.3265	3.8944	TCGA-L9-A443-01
LUAD(N=511)	0.3233	4.9691	TCGA-78-8660-01
LUAD(N=511)	0.3143	5.2799	TCGA-78-7148-01
LUAD(N=511)	0.2956	4.4088	TCGA-67-6215-01
LUAD(N=511)	0.3394	4.8963	TCGA-55-A490-01
LUAD(N=511)	0.3588	4.936	TCGA-69-7974-01
LUAD(N=511)	0.3241	4.7367	TCGA-49-AAR4-01
LUAD(N=511)	0.2744	3.8561	TCGA-05-4418-01
LUAD(N=511)	0.2877	3.6054	TCGA-35-4123-01
LUAD(N=511)	0.2795	3.7825	TCGA-55-6969-01
LUAD(N=511)	0.3523	5.1835	TCGA-91-8497-01
LUAD(N=511)	0.3313	4.4751	TCGA-62-A470-01
LUAD(N=511)	0.3105	4.8817	TCGA-53-A4EZ-01
LUAD(N=511)	0.3088	5.3639	TCGA-78-7162-01
LUAD(N=511)	0.3295	4.7919	TCGA-62-A46Y-01
LUAD(N=511)	0.3214	5.8585	TCGA-62-A46R-01
LUAD(N=511)	0.2886	4.2766	TCGA-05-4244-01
LUAD(N=511)	0.3245	4.691	TCGA-L9-A8F4-01
LUAD(N=511)	0.3484	5.3165	TCGA-55-7726-01
LUAD(N=511)	0.307	5.0989	TCGA-49-4512-01
LUAD(N=511)	0.35	5.0246	TCGA-73-A9RS-01
LUAD(N=511)	0.3054	4.5217	TCGA-MP-A4TD-01
LUAD(N=511)	0.2962	4.533	TCGA-75-5147-01
LUAD(N=511)	0.3047	5.6445	TCGA-44-7671-01
LUAD(N=511)	0.3091	3.8411	TCGA-38-4631-01
LUAD(N=511)	0.321	5.1152	TCGA-NJ-A55O-01
LUAD(N=511)	0.2992	4.4913	TCGA-75-6211-01
LUAD(N=511)	0.3106	3.7182	TCGA-05-5420-01
LUAD(N=511)	0.2912	4.5577	TCGA-55-1594-01
LUAD(N=511)	0.3093	4.0207	TCGA-64-5774-01
LUAD(N=511)	0.292	4.916	TCGA-50-5941-01
LUAD(N=511)	0.2713	5.15965	TCGA-44-2662-01
LUAD(N=511)	0.2987	5.1974	TCGA-97-A4M2-01
LUAD(N=511)	0.3538	5.3245	TCGA-55-7995-01
LUAD(N=511)	0.3486	4.7242	TCGA-95-7043-01
LUAD(N=511)	0.3221	4.7762	TCGA-NJ-A4YP-01
LUAD(N=511)	0.3065	6.132	TCGA-97-A4M1-01
LUAD(N=511)	0.3146	4.7682	TCGA-78-7149-01
LUAD(N=511)	0.3095	5.018	TCGA-MP-A4TC-01
LUAD(N=511)	0.2956	5.6139	TCGA-97-A4M5-01
LUAD(N=511)	0.3429	3.8105	TCGA-99-8028-01
LUAD(N=511)	0.2965	6.1297	TCGA-67-6217-01
LUAD(N=511)	0.3287	5.3104	TCGA-44-A47B-01
LUAD(N=511)	0.3118	4.2951	TCGA-38-4628-01
LUAD(N=511)	0.3059	5.0968	TCGA-05-4250-01
LUAD(N=511)	0.2771	5.4463	TCGA-67-3774-01
LUAD(N=511)	0.2893	4.5154	TCGA-80-5608-01
LUAD(N=511)	0.2907	4.4887	TCGA-05-4389-01
LUAD(N=511)	0.2893	5.4549	TCGA-75-6203-01
LUAD(N=511)	0.275	5.7926	TCGA-55-6981-01
LUAD(N=511)	0.3455	4.6988	TCGA-55-7903-01
LUAD(N=511)	0.3238	4.8748	TCGA-62-8394-01
LUAD(N=511)	0.2967	5.3893	TCGA-49-4488-01
LUAD(N=511)	0.2959	5.2533	TCGA-78-7537-01
LUAD(N=511)	0.2913	6.5475	TCGA-80-5611-01
LUAD(N=511)	0.2864	4.8395	TCGA-55-6972-01
LUAD(N=511)	0.3385	3.741	TCGA-86-A4D0-01
LUAD(N=511)	0.3364	6.1544	TCGA-97-7941-01
LUAD(N=511)	0.2902	5.8687	TCGA-91-6840-01
LUAD(N=511)	0.3431	5.0379	TCGA-69-7978-01
LUAD(N=511)	0.2831	4.6543	TCGA-50-5930-01
LUAD(N=511)	0.3262	4.2958	TCGA-93-8067-01
LUAD(N=511)	0.3191	4.4673	TCGA-44-A479-01
LUAD(N=511)	0.3177	6.0372	TCGA-55-8087-01
LUAD(N=511)	0.2982	5.2917	TCGA-86-6562-01
LUAD(N=511)	0.3179	5.0867	TCGA-05-4425-01
LUAD(N=511)	0.3122	5.6247	TCGA-MP-A4SW-01
LUAD(N=511)	0.318	6.0424	TCGA-55-8512-01
LUAD(N=511)	0.2832	4.1236	TCGA-67-3770-01
LUAD(N=511)	0.2877	6.9197	TCGA-50-6592-01
LUAD(N=511)	0.2973	4.8978	TCGA-55-6975-01
LUAD(N=511)	0.3278	5.5877	TCGA-S2-AA1A-01
LUAD(N=511)	0.3413	5.3367	TCGA-55-8511-01
LUAD(N=511)	0.2715	5.6227	TCGA-05-4434-01
LUAD(N=511)	0.319	4.7033	TCGA-55-8092-01
LUAD(N=511)	0.3098	5.373	TCGA-L9-A50W-01
LUAD(N=511)	0.3087	4.9303	TCGA-44-7661-01
LUAD(N=511)	0.2836	5.4545	TCGA-05-4426-01
LUAD(N=511)	0.2876	4.5085	TCGA-05-4390-01
LUAD(N=511)	0.2793	4.8017	TCGA-64-5815-01
LUAD(N=511)	0.3157	5.8689	TCGA-69-7761-01
LUAD(N=511)	0.3329	4.3807	TCGA-55-8301-01
LUAD(N=511)	0.3233	5.6496	TCGA-44-A4SU-01
LUAD(N=511)	0.3239	5.0352	TCGA-69-7765-01
LUAD(N=511)	0.3053	7.1384	TCGA-05-4433-01
LUAD(N=511)	0.3292	4.0515	TCGA-55-8508-01
LUAD(N=511)	0.313	4.0488	TCGA-50-5044-01
LUAD(N=511)	0.285	5.6005	TCGA-05-4384-01
LUAD(N=511)	0.322	6.0618	TCGA-O1-A52J-01
LUAD(N=511)	0.317	5.7722	TCGA-78-7220-01
LUAD(N=511)	0.2843	4.5047	TCGA-05-4422-01
LUAD(N=511)	0.2979	6.2459	TCGA-44-6779-01
LUAD(N=511)	0.3472	4.0462	TCGA-86-8672-01
LUAD(N=511)	0.3045	4.5123	TCGA-55-6983-01
LUAD(N=511)	0.3308	2.7051	TCGA-91-8499-01
LUAD(N=511)	0.3153	5.0251	TCGA-91-6836-01
LUAD(N=511)	0.3598	4.4628	TCGA-38-7271-01
LUAD(N=511)	0.3188	4.6347	TCGA-NJ-A4YG-01
LUAD(N=511)	0.3074	4.4868	TCGA-73-4658-01
LUAD(N=511)	0.3188	4.3506	TCGA-86-8076-01
LUAD(N=511)	0.3051	4.0251	TCGA-55-6987-01
LUAD(N=511)	0.3139	4.4861	TCGA-78-7152-01
LUAD(N=511)	0.3506	5.0566	TCGA-55-8096-01
LUAD(N=511)	0.2898	4.9031	TCGA-75-5122-01
LUAD(N=511)	0.3013	4.7192	TCGA-50-5931-01
LUAD(N=511)	0.3115	4.9519	TCGA-49-AARO-01
LUAD(N=511)	0.2747	5.4323	TCGA-44-2655-01
LUAD(N=511)	0.2789	5.527	TCGA-73-4668-01
LUAD(N=511)	0.3197	4.4243	TCGA-91-6831-01
LUAD(N=511)	0.3278	4.6583	TCGA-L9-A444-01
LUAD(N=511)	0.3001	4.8022	TCGA-05-5425-01
LUAD(N=511)	0.3101	5.07486	TCGA-44-6775-01
LUAD(N=511)	0.296	5.5982	TCGA-75-7025-01
LUAD(N=511)	0.3031	5.3527	TCGA-05-5429-01
LUAD(N=511)	0.2904	5.2491	TCGA-99-7458-01
LUAD(N=511)	0.3147	4.748	TCGA-97-7546-01
LUAD(N=511)	0.2699	4.4357	TCGA-67-3772-01
LUAD(N=511)	0.2956	4.4277	TCGA-05-4395-01
LUAD(N=511)	0.3602	4.6938	TCGA-91-7771-01
LUAD(N=511)	0.3082	5.9887	TCGA-55-6984-01
LUAD(N=511)	0.3106	3.25565	TCGA-44-3918-01
LUAD(N=511)	0.3327	5.2315	TCGA-50-8459-01
LUAD(N=511)	0.3681	5.6645	TCGA-69-7980-01
LUAD(N=511)	0.3341	5.5766	TCGA-50-5939-01
LUAD(N=511)	0.2958	5.3227	TCGA-75-5126-01
LUAD(N=511)	0.3083	4.7442	TCGA-50-6594-01
LUAD(N=511)	0.3234	5.9074	TCGA-MP-A5C7-01
LUAD(N=511)	0.3481	4.45508	TCGA-44-5645-01
LUAD(N=511)	0.3089	5.3768	TCGA-50-5935-01
LUAD(N=511)	0.3043	5.9832	TCGA-55-7914-01
LUAD(N=511)	0.3078	4.5748	TCGA-55-7576-01
LUAD(N=511)	0.3003	4.52051	TCGA-44-2666-01
LUAD(N=511)	0.3198	6.5703	TCGA-55-7284-01
LUAD(N=511)	0.3162	5.405	TCGA-73-4676-01
LUAD(N=511)	0.3093	4.0419	TCGA-78-7166-01
LUAD(N=511)	0.3239	5.813	TCGA-83-5908-01
LUAD(N=511)	0.3052	4.1161	TCGA-50-5049-01
LUAD(N=511)	0.3466	4.6428	TCGA-44-3396-01
LUAD(N=511)	0.3222	5.9124	TCGA-97-8172-01
LUAD(N=511)	0.3029	4.0019	TCGA-50-6597-01
LUAD(N=511)	0.3363	3.7867	TCGA-69-8255-01
LUAD(N=511)	0.3108	5.2939	TCGA-62-A46U-01
LUAD(N=511)	0.3459	4.9561	TCGA-97-8176-01
LUAD(N=511)	0.3391	4.6725	TCGA-86-8358-01
LUAD(N=511)	0.3033	5.2646	TCGA-05-4415-01
LUAD(N=511)	0.2873	4.6787	TCGA-55-7281-01
LUAD(N=511)	0.2989	4.3285	TCGA-78-7161-01
LUAD(N=511)	0.2769	3.3563	TCGA-49-4507-01
LUAD(N=511)	0.3078	5.2211	TCGA-55-8621-01
LUAD(N=511)	0.3069	4.8059	TCGA-55-6970-01
LUAD(N=511)	0.2953	5.5233	TCGA-75-6207-01
LUAD(N=511)	0.3331	5.3299	TCGA-55-8205-01
LUAD(N=511)	0.3202	5.3252	TCGA-69-7763-01
LUAD(N=511)	0.3381	4.7491	TCGA-55-7913-01
LUAD(N=511)	0.3149	4.7608	TCGA-62-8397-01
LUAD(N=511)	0.2919	4.9218	TCGA-73-4659-01
LUAD(N=511)	0.3357	3.8441	TCGA-91-A4BC-01
LUAD(N=511)	0.3431	5.2895	TCGA-97-8547-01
LUAD(N=511)	0.3039	4.4881	TCGA-97-8175-01
LUAD(N=511)	0.2979	5.859	TCGA-86-8075-01
LUAD(N=511)	0.3005	5.0291	TCGA-55-6985-01
LUAD(N=511)	0.3152	5.1514	TCGA-55-A48X-01
LUAD(N=511)	0.2817	4.9331	TCGA-44-2657-01
LUAD(N=511)	0.3409	4.3492	TCGA-95-7562-01
LUAD(N=511)	0.3117	5.0644	TCGA-55-7725-01
LUAD(N=511)	0.3272	4.2064	TCGA-69-A59K-01
LUAD(N=511)	0.3207	5.5562	TCGA-05-5715-01
LUAD(N=511)	0.3293	5.0242	TCGA-55-A492-01
LUAD(N=511)	0.296	5.3618	TCGA-78-7145-01
LUAD(N=511)	0.3248	5.3194	TCGA-86-8278-01
LUAD(N=511)	0.3204	4.8269	TCGA-MN-A4N5-01
LUAD(N=511)	0.3135	3.242	TCGA-64-5778-01
LUAD(N=511)	0.313	5.7679	TCGA-J2-8194-01
LUAD(N=511)	0.3221	6.4343	TCGA-55-A57B-01
LUAD(N=511)	0.2806	5.1744	TCGA-38-4627-01
LUAD(N=511)	0.3021	4.7898	TCGA-86-7711-01
LUAD(N=511)	0.3204	4.6352	TCGA-05-5423-01
LUAD(N=511)	0.3433	3.6872	TCGA-91-8496-01
LUAD(N=511)	0.3218	5.6787	TCGA-86-8280-01
LUAD(N=511)	0.3286	6.40666	TCGA-44-6146-01
LUAD(N=511)	0.2965	5.6778	TCGA-78-7146-01
LUAD(N=511)	0.2776	3.0774	TCGA-35-4122-01
LUAD(N=511)	0.3313	4.6387	TCGA-78-8648-01
LUAD(N=511)	0.3435	5.3338	TCGA-86-7953-01
LUAD(N=511)	0.321	4.5723	TCGA-44-5643-01
LUAD(N=511)	0.3439	5.8256	TCGA-73-7498-01
LUAD(N=511)	0.2991	5.8133	TCGA-75-6214-01
LUAD(N=511)	0.3085	5.0255	TCGA-93-7348-01
LUAD(N=511)	0.3258	5.4813	TCGA-97-8174-01
LUAD(N=511)	0.3391	3.907	TCGA-55-8620-01
LUAD(N=511)	0.3201	4.6651	TCGA-62-8399-01
LUAD(N=511)	0.3103	5.3202	TCGA-80-5607-01
LUAD(N=511)	0.3355	3.7709	TCGA-49-AAR2-01
LUAD(N=511)	0.3	5.5466	TCGA-55-6543-01
LUAD(N=511)	0.2866	5.09	TCGA-49-4501-01
LUAD(N=511)	0.2956	5.2865	TCGA-78-7156-01
LUAD(N=511)	0.3163	5.7082	TCGA-62-A46S-01
LUAD(N=511)	0.3256	3.9847	TCGA-49-AARQ-01
LUAD(N=511)	0.3078	6.0919	TCGA-93-A4JN-01
LUAD(N=511)	0.3373	4.3709	TCGA-91-6847-01
LUAD(N=511)	0.3046	4.3177	TCGA-55-6642-01
LUAD(N=511)	0.3099	4.5772	TCGA-55-8203-01
LUAD(N=511)	0.3216	5.4903	TCGA-44-7670-01
LUAD(N=511)	0.3186	4.4496	TCGA-MP-A4TJ-01
LUAD(N=511)	0.2925	6.2983	TCGA-38-6178-01
LUAD(N=511)	0.3273	5.8316	TCGA-86-8074-01
LUAD(N=511)	0.3503	5.2231	TCGA-55-8616-01
LUAD(N=511)	0.33	4.4919	TCGA-97-A4M0-01
LUAD(N=511)	0.3133	5.3954	TCGA-49-6767-01
LUAD(N=511)	0.2662	4.8048	TCGA-55-1595-01
LUAD(N=511)	0.3245	4.764	TCGA-49-AARR-01
LUAD(N=511)	0.307	5.6476	TCGA-MP-A4T9-01
LUAD(N=511)	0.3404	4.74491	TCGA-44-6147-01
LUAD(N=511)	0.3277	6.351	TCGA-86-8073-01
LUAD(N=511)	0.3073	6.2763	TCGA-MN-A4N4-01
LUAD(N=511)	0.306	4.511	TCGA-97-A4M3-01
LUAD(N=511)	0.3042	5.4016	TCGA-86-7714-01
LUAD(N=511)	0.295	3.3321	TCGA-49-4487-01
LUAD(N=511)	0.324	6.4699	TCGA-78-7542-01
LUAD(N=511)	0.3282	5.2593	TCGA-95-A4VK-01
LUAD(N=511)	0.3527	5.4473	TCGA-55-7994-01
LUAD(N=511)	0.3036	4.7565	TCGA-49-6742-01
LUAD(N=511)	0.3441	7.0205	TCGA-MP-A4T6-01
LUAD(N=511)	0.5316	4.3576	TCGA-55-8506-01
LUAD(N=511)	0.3176	5.0122	TCGA-MP-A4TA-01
LUAD(N=511)	0.3272	4.6999	TCGA-55-8091-01
LUAD(N=511)	0.299	5.383	TCGA-91-6828-01
LUAD(N=511)	0.3281	2.7826	TCGA-35-5375-01
LUAD(N=511)	0.313	5.9723	TCGA-97-A4M7-01
LUAD(N=511)	0.3056	4.9251	TCGA-78-7539-01
LUAD(N=511)	0.3327	6.1475	TCGA-J2-8192-01
LUAD(N=511)	0.3155	5.434	TCGA-86-7713-01
LUAD(N=511)	0.2921	4.9374	TCGA-67-6216-01
LUAD(N=511)	0.3181	4.8207	TCGA-44-A47G-01
LUAD(N=511)	0.2941	5.3184	TCGA-55-7816-01
LUAD(N=511)	0.3081	5.2732	TCGA-78-7147-01
LUAD(N=511)	0.281	3.793	TCGA-44-3398-01
LUAD(N=511)	0.3017	6.1687	TCGA-78-7633-01
LUAD(N=511)	0.3062	5.7323	TCGA-86-A4P8-01
LUAD(N=511)	0.3105	4.2699	TCGA-78-7535-01
LUAD(N=511)	0.3378	5.2597	TCGA-86-8671-01
LUAD(N=511)	0.2993	5.7279	TCGA-91-6835-01
LUAD(N=511)	0.2804	4.9458	TCGA-35-3615-01
LUAD(N=511)	0.2955	6.1281	TCGA-55-6980-01
LUAD(N=511)	0.3083	4.4739	TCGA-50-5936-01
LUAD(N=511)	0.2958	5.6445	TCGA-73-4675-01
LUAD(N=511)	0.3033	6.0713	TCGA-50-5932-01
LUAD(N=511)	0.3048	5.2877	TCGA-93-A4JO-01
LUAD(N=511)	0.3164	4.8405	TCGA-49-AAR3-01
LUAD(N=511)	0.3163	5.6868	TCGA-78-7154-01
LUAD(N=511)	0.3415	4.8881	TCGA-55-7910-01
LUAD(N=511)	0.3475	4.8729	TCGA-4B-A93V-01
LUAD(N=511)	0.3012	5.1958	TCGA-91-6849-01
LUAD(N=511)	0.3095	5.6404	TCGA-MP-A4SY-01
LUAD(N=511)	0.3118	4.9969	TCGA-MP-A4SV-01
LUAD(N=511)	0.3194	5.7209	TCGA-55-8513-01
LUAD(N=511)	0.3216	4.9137	TCGA-MP-A4T4-01
LUAD(N=511)	0.311	6.3815	TCGA-71-8520-01
LUAD(N=511)	0.3068	4.0884	TCGA-44-7672-01
LUAD(N=511)	0.2839	5.3031	TCGA-50-6593-01
LUAD(N=511)	0.3631	4.5015	TCGA-69-7973-01
LUAD(N=511)	0.3208	4.9937	TCGA-67-3771-01
LUAD(N=511)	0.3357	5.5853	TCGA-99-8033-01
LUAD(N=511)	0.2978	5.5814	TCGA-91-6848-01
LUAD(N=511)	0.2995	5.6297	TCGA-93-A4JP-01
LUAD(N=511)	0.3275	5.4276	TCGA-38-A44F-01
LUAD(N=511)	0.3098	3.867	TCGA-44-7660-01
LUAD(N=511)	0.3473	4.4523	TCGA-69-7760-01
LUAD(N=511)	0.3472	5.6582	TCGA-69-7764-01
LUAD(N=511)	0.3006	4.50006	TCGA-44-2665-01
LUAD(N=511)	0.3302	5.6279	TCGA-55-8505-01
LUAD(N=511)	0.3321	4.423	TCGA-95-7944-01
LUAD(N=511)	0.3574	4.7033	TCGA-L9-A7SV-01
LUAD(N=511)	0.3445	6.4668	TCGA-55-8089-01
LUAD(N=511)	0.3037	5.6171	TCGA-55-7283-01
LUAD(N=511)	0.3512	4.2072	TCGA-44-8117-01
LUAD(N=511)	0.3176	5.796	TCGA-53-7626-01
LUAD(N=511)	0.3382	4.3555	TCGA-86-8673-01
LUAD(N=511)	0.3051	4.347	TCGA-95-8494-01
LUAD(N=511)	0.3261	4.0366	TCGA-97-8171-01
LUAD(N=511)	0.3035	4.839	TCGA-50-7109-01
LUAD(N=511)	0.3023	4.9865	TCGA-44-6145-01
LUAD(N=511)	0.3109	4.7682	TCGA-55-8085-01
LUAD(N=511)	0.3395	4.9528	TCGA-NJ-A4YF-01
LUAD(N=511)	0.3235	5.1473	TCGA-NJ-A7XG-01
LUAD(N=511)	0.2921	5.5283	TCGA-05-4403-01
LUAD(N=511)	0.3278	6.3834	TCGA-55-8097-01
LUAD(N=511)	0.32	5.3078	TCGA-NJ-A4YQ-01
LUAD(N=511)	0.3077	6.6411	TCGA-97-7547-01
LUAD(N=511)	0.3053	4.6508	TCGA-55-5899-01
LUAD(N=511)	0.2886	4.9833	TCGA-05-4397-01
LUAD(N=511)	0.3033	4.8095	TCGA-44-6777-01
LUAD(N=511)	0.337	4.7496	TCGA-55-7815-01
LUAD(N=511)	0.3068	5.5379	TCGA-91-6830-01
LUAD(N=511)	0.3039	5.7339	TCGA-44-A4SS-01
LUAD(N=511)	0.3019	5.0934	TCGA-44-7659-01
LUAD(N=511)	0.3387	3.9929	TCGA-53-7813-01
LUAD(N=511)	0.3193	5.1538	TCGA-05-4382-01
LUAD(N=511)	0.3075	5.0374	TCGA-93-A4JQ-01
LUAD(N=511)	0.298	3.3393	TCGA-05-5428-01
LUAD(N=511)	0.2868	5.3705	TCGA-55-6986-01
[truncated: 9,191 more rows]

## Sheet: MSI_r_value
type	r_value
GBM	0.109237
LGG	0.0467919
CESC	0.0897164
LUAD	0.0145796
COAD	-0.0111626
LAML	0.211199
BRCA	-0.00863938
ESCA	0.144262
SARC	0.0807942
KIRP	0.104887
STAD	0.0165534
PRAD	-0.135749
UCEC	0.181556
HNSC	-0.102885
KIRC	0.0719186
LUSC	0.15446
THYM	-0.042722
LIHC	0.0312113
THCA	-0.0994387
MESO	-0.133644
READ	0.115189
PAAD	0.00452933
OV	-0.0368465
TGCT	0.188497
PCPG	0.00949133
SKCM	0.0150294
UVM	0.238882
UCS	-0.174227
BLCA	-0.0215721
ACC	0.0924623
KICH	0.00786571
CHOL	0.322297
DLBC	-0.618438

## Sheet: NEO
	Neoantigen	Expression	SampleName
GBM(N=117)	43	4.2173	TCGA-19-1787-01
GBM(N=117)	21	4.4357	TCGA-06-5412-01
GBM(N=117)	8	4.9709	TCGA-06-2565-01
GBM(N=117)	0	4.7565	TCGA-06-2561-01
GBM(N=117)	0	3.97	TCGA-06-0132-01
GBM(N=117)	28	4.5497	TCGA-19-2629-01
GBM(N=117)	1	3.2267	TCGA-06-0238-01
GBM(N=117)	1	3.6589	TCGA-06-0749-01
GBM(N=117)	2	4.4081	TCGA-06-0174-01
GBM(N=117)	3	4.518	TCGA-28-2513-01
GBM(N=117)	8	5.0828	TCGA-76-4929-01
GBM(N=117)	2	4.7581	TCGA-32-2634-01
GBM(N=117)	1	4.7981	TCGA-06-0125-01
GBM(N=117)	0	4.1954	TCGA-26-1442-01
GBM(N=117)	3	4.0523	TCGA-26-5136-01
GBM(N=117)	1	4.3527	TCGA-06-0184-01
GBM(N=117)	6	4.3371	TCGA-14-0790-01
GBM(N=117)	0	4.3772	TCGA-26-5132-01
GBM(N=117)	0	4.2389	TCGA-76-4932-01
GBM(N=117)	1	4.926	TCGA-32-1970-01
GBM(N=117)	4	4.0471	TCGA-14-0787-01
GBM(N=117)	4	3.6359	TCGA-12-0618-01
GBM(N=117)	0	2.8562	TCGA-27-2524-01
GBM(N=117)	2	4.7714	TCGA-06-0190-01
GBM(N=117)	0	4.0225	TCGA-06-0745-01
GBM(N=117)	1	4.1899	TCGA-26-5135-01
GBM(N=117)	4	4.1119	TCGA-41-3915-01
GBM(N=117)	7	1.8957	TCGA-27-1831-01
GBM(N=117)	0	4.8851	TCGA-28-1753-01
GBM(N=117)	6	3.245	TCGA-12-5295-01
GBM(N=117)	1	4.1571	TCGA-28-5204-01
GBM(N=117)	132	5.1165	TCGA-06-2569-01
GBM(N=117)	0	4.6288	TCGA-06-2559-01
GBM(N=117)	2	2.7161	TCGA-27-2526-01
GBM(N=117)	0	4.4713	TCGA-06-5856-01
GBM(N=117)	1	3.6635	TCGA-06-5418-01
GBM(N=117)	0	4.5802	TCGA-06-5414-01
GBM(N=117)	14	3.9691	TCGA-06-5417-01
GBM(N=117)	3	1.5854	TCGA-26-5134-01
GBM(N=117)	2	5.037	TCGA-76-4925-01
GBM(N=117)	2	4.5009	TCGA-06-5413-01
GBM(N=117)	1	4.6759	TCGA-06-0646-01
GBM(N=117)	2	3.8808	TCGA-12-0616-01
GBM(N=117)	4	4.4602	TCGA-19-2620-01
GBM(N=117)	1	3.9608	TCGA-16-0846-01
GBM(N=117)	20	4.7437	TCGA-02-0047-01
GBM(N=117)	8	4.656	TCGA-19-2624-01
GBM(N=117)	0	4.3604	TCGA-32-1982-01
GBM(N=117)	4	4.4183	TCGA-27-1835-01
GBM(N=117)	2	4.6136	TCGA-06-0747-01
GBM(N=117)	0	4.061	TCGA-28-5220-01
GBM(N=117)	3	3.3148	TCGA-14-0817-01
GBM(N=117)	14	4.3814	TCGA-06-2570-01
GBM(N=117)	3	4.6588	TCGA-41-4097-01
GBM(N=117)	5	4.65909	TCGA-06-0211-01
GBM(N=117)	4	4.0091	TCGA-02-2483-01
GBM(N=117)	0	4.6393	TCGA-27-2523-01
GBM(N=117)	8	4.4562	TCGA-27-1837-01
GBM(N=117)	28	3.6324	TCGA-06-0744-01
GBM(N=117)	0	3.5149	TCGA-32-5222-01
GBM(N=117)	5	4.4887	TCGA-27-2519-01
GBM(N=117)	11	4.5736	TCGA-12-0821-01
GBM(N=117)	19	4.7913	TCGA-19-2619-01
GBM(N=117)	3	5.0299	TCGA-14-0789-01
GBM(N=117)	18	4.7971	TCGA-28-5209-01
GBM(N=117)	12	4.7231	TCGA-28-5218-01
GBM(N=117)	10	4.7464	TCGA-28-2514-01
GBM(N=117)	1	4.0627	TCGA-06-5859-01
GBM(N=117)	3	4.5632	TCGA-28-2509-01
GBM(N=117)	0	4.2601	TCGA-19-4065-01
GBM(N=117)	2	4.2304	TCGA-02-2485-01
GBM(N=117)	9	3.1908	TCGA-12-1597-01
GBM(N=117)	6	4.656	TCGA-28-1747-01
GBM(N=117)	5	4.2009	TCGA-06-0649-01
GBM(N=117)	0	5.109	TCGA-06-2564-01
GBM(N=117)	0	4.7415	TCGA-06-5408-01
GBM(N=117)	9	3.6827	TCGA-27-1832-01
GBM(N=117)	4	4.6747	TCGA-32-2615-01
GBM(N=117)	11	4.8284	TCGA-06-0158-01
GBM(N=117)	2	4.178	TCGA-28-5216-01
GBM(N=117)	3	4.735	TCGA-28-5207-01
GBM(N=117)	5	5.1946	TCGA-06-0130-01
GBM(N=117)	89	3.6125	TCGA-06-5416-01
GBM(N=117)	1	3.4804	TCGA-06-0168-01
GBM(N=117)	1	4.1466	TCGA-06-5415-01
GBM(N=117)	3	4.4562	TCGA-26-5139-01
GBM(N=117)	7	4.2862	TCGA-76-4928-01
GBM(N=117)	9	4.6702	TCGA-06-0644-01
GBM(N=117)	0	4.0091	TCGA-14-0871-01
GBM(N=117)	0	4.7187	TCGA-06-0882-01
GBM(N=117)	0	4.1285	TCGA-19-2625-01
GBM(N=117)	0	4.5964	TCGA-27-1834-01
GBM(N=117)	0	3.7836	TCGA-41-2571-01
GBM(N=117)	5	4.7005	TCGA-14-0781-01
GBM(N=117)	8	4.439	TCGA-06-0157-01
GBM(N=117)	2	4.6623	TCGA-12-3653-01
GBM(N=117)	3	4.7318	TCGA-76-4926-01
GBM(N=117)	2	4.4932	TCGA-26-5133-01
GBM(N=117)	13	4.7851	TCGA-06-2562-01
GBM(N=117)	17	3.87	TCGA-27-2521-01
GBM(N=117)	6	4.4417	TCGA-06-0210-01
GBM(N=117)	9	4.8202	TCGA-19-5960-01
GBM(N=117)	1	4.1327	TCGA-06-0686-01
GBM(N=117)	4	2.2452	TCGA-32-4213-01
GBM(N=117)	0	4.4061	TCGA-15-0742-01
GBM(N=117)	0	4.7704	TCGA-06-0187-01
GBM(N=117)	0	4.9887	TCGA-19-1390-01
GBM(N=117)	13	4.4874	TCGA-06-2557-01
GBM(N=117)	8	4.8655	TCGA-06-0878-01
GBM(N=117)	4	4.7929	TCGA-06-0129-01
GBM(N=117)	14	4.9336	TCGA-16-1045-01
GBM(N=117)	8	4.4364	TCGA-06-2567-01
GBM(N=117)	0	4.1962	TCGA-28-5208-01
GBM(N=117)	0	2.8955	TCGA-14-2554-01
GBM(N=117)	3	4.166	TCGA-27-2528-01
GBM(N=117)	0	4.8958	TCGA-06-5858-01
GBM(N=117)	6	3.9571	TCGA-06-0743-01
GBMLGG(N=520)	43	4.2173	TCGA-19-1787-01
GBMLGG(N=520)	4	4.5349	TCGA-S9-A7J2-01
GBMLGG(N=520)	2	4.7426	TCGA-E1-A7YI-01
GBMLGG(N=520)	21	4.4357	TCGA-06-5412-01
GBMLGG(N=520)	14	4.7016	TCGA-DU-7302-01
GBMLGG(N=520)	2	4.2533	TCGA-P5-A5EX-01
GBMLGG(N=520)	14	4.4874	TCGA-FG-A60K-01
GBMLGG(N=520)	8	4.9709	TCGA-06-2565-01
GBMLGG(N=520)	0	4.7565	TCGA-06-2561-01
GBMLGG(N=520)	0	5.1526	TCGA-CS-5397-01
GBMLGG(N=520)	4	4.5862	TCGA-E1-5322-01
GBMLGG(N=520)	0	4.5305	TCGA-HT-7854-01
GBMLGG(N=520)	3	4.1716	TCGA-HT-7467-01
GBMLGG(N=520)	0	4.2373	TCGA-HT-7874-01
GBMLGG(N=520)	1	4.2987	TCGA-VM-A8CD-01
GBMLGG(N=520)	0	3.97	TCGA-06-0132-01
GBMLGG(N=520)	3	4.4938	TCGA-HT-7616-01
GBMLGG(N=520)	1	4.691	TCGA-KT-A7W1-01
GBMLGG(N=520)	1	4.3442	TCGA-P5-A5F2-01
GBMLGG(N=520)	28	4.5497	TCGA-19-2629-01
GBMLGG(N=520)	1	4.2025	TCGA-HT-7607-01
GBMLGG(N=520)	1	3.2267	TCGA-06-0238-01
GBMLGG(N=520)	5	4.9612	TCGA-HT-7873-01
GBMLGG(N=520)	1	3.6589	TCGA-06-0749-01
GBMLGG(N=520)	2	4.197	TCGA-DB-A64P-01
GBMLGG(N=520)	2	4.4081	TCGA-06-0174-01
GBMLGG(N=520)	3	3.8401	TCGA-DU-7011-01
GBMLGG(N=520)	10	3.7961	TCGA-P5-A77X-01
GBMLGG(N=520)	4	3.8759	TCGA-VM-A8CA-01
GBMLGG(N=520)	3	4.4183	TCGA-DU-7015-01
GBMLGG(N=520)	0	4.2995	TCGA-TM-A84O-01
GBMLGG(N=520)	4	4.1409	TCGA-S9-A7R3-01
GBMLGG(N=520)	3	4.518	TCGA-28-2513-01
GBMLGG(N=520)	13	4.281	TCGA-DU-A6S6-01
GBMLGG(N=520)	33	4.4437	TCGA-P5-A735-01
GBMLGG(N=520)	0	3.4384	TCGA-FG-A6J1-01
GBMLGG(N=520)	13	5.0308	TCGA-S9-A7R7-01
GBMLGG(N=520)	8	5.0828	TCGA-76-4929-01
GBMLGG(N=520)	3	4.8465	TCGA-DU-6402-01
GBMLGG(N=520)	0	3.2885	TCGA-HT-7684-01
GBMLGG(N=520)	4	4.8954	TCGA-HT-8104-01
GBMLGG(N=520)	55	4.4615	TCGA-FN-7833-01
GBMLGG(N=520)	1	4.7592	TCGA-HT-7473-01
GBMLGG(N=520)	5	4.306	TCGA-DB-A4XF-01
GBMLGG(N=520)	5	4.4304	TCGA-FG-A713-01
GBMLGG(N=520)	2	4.2556	TCGA-E1-A7YL-01
GBMLGG(N=520)	1	4.964	TCGA-CS-5396-01
GBMLGG(N=520)	8	4.783	TCGA-HW-8322-01
GBMLGG(N=520)	4	4.0943	TCGA-S9-A6U9-01
GBMLGG(N=520)	0	4.1466	TCGA-HT-7676-01
GBMLGG(N=520)	1	4.7793	TCGA-HT-7469-01
GBMLGG(N=520)	2	4.7581	TCGA-32-2634-01
GBMLGG(N=520)	1	4.4938	TCGA-HT-7478-01
GBMLGG(N=520)	1	4.497	TCGA-DU-A5TW-01
GBMLGG(N=520)	14	3.945	TCGA-S9-A6TX-01
GBMLGG(N=520)	6	3.981	TCGA-RY-A83Z-01
GBMLGG(N=520)	1	4.7981	TCGA-06-0125-01
GBMLGG(N=520)	0	3.5022	TCGA-FG-A6IZ-01
GBMLGG(N=520)	1	4.327	TCGA-HW-8321-01
GBMLGG(N=520)	0	4.9915	TCGA-EZ-7264-01
GBMLGG(N=520)	0	4.4713	TCGA-CS-6666-01
GBMLGG(N=520)	2	4.8074	TCGA-HW-7491-01
GBMLGG(N=520)	1	4.7533	TCGA-S9-A6U1-01
GBMLGG(N=520)	0	4.551	TCGA-E1-5307-01
GBMLGG(N=520)	5	4.3292	TCGA-HW-7495-01
GBMLGG(N=520)	1	4.1756	TCGA-HT-7481-01
GBMLGG(N=520)	0	4.1954	TCGA-26-1442-01
GBMLGG(N=520)	5	4.8763	TCGA-HT-8110-01
GBMLGG(N=520)	18	4.7523	TCGA-QH-A6CW-01
GBMLGG(N=520)	0	4.8017	TCGA-DU-5870-01
GBMLGG(N=520)	3	4.0523	TCGA-26-5136-01
GBMLGG(N=520)	1	4.3527	TCGA-06-0184-01
GBMLGG(N=520)	0	4.918	TCGA-FG-8182-01
GBMLGG(N=520)	6	4.3371	TCGA-14-0790-01
GBMLGG(N=520)	0	4.3772	TCGA-26-5132-01
GBMLGG(N=520)	3	4.2181	TCGA-FG-6688-01
GBMLGG(N=520)	0	4.1859	TCGA-HT-8113-01
GBMLGG(N=520)	0	4.2389	TCGA-76-4932-01
GBMLGG(N=520)	1	4.5748	TCGA-HT-7689-01
GBMLGG(N=520)	0	4.6323	TCGA-DU-7013-01
GBMLGG(N=520)	1	4.926	TCGA-32-1970-01
GBMLGG(N=520)	3	4.5199	TCGA-E1-A7Z3-01
GBMLGG(N=520)	1	3.8054	TCGA-HT-7476-01
GBMLGG(N=520)	0	4.511	TCGA-TQ-A7RG-01
GBMLGG(N=520)	20	4.2212	TCGA-DU-A7T6-01
GBMLGG(N=520)	4	4.728	TCGA-DB-A4XC-01
GBMLGG(N=520)	9	4.1636	TCGA-FG-A4MW-01
GBMLGG(N=520)	1	4.3681	TCGA-DH-5142-01
GBMLGG(N=520)	4	4.0471	TCGA-14-0787-01
GBMLGG(N=520)	4	3.6359	TCGA-12-0618-01
GBMLGG(N=520)	0	2.8562	TCGA-27-2524-01
GBMLGG(N=520)	1	4.3855	TCGA-TQ-A7RH-01
GBMLGG(N=520)	9	4.4758	TCGA-HT-8012-01
GBMLGG(N=520)	0	4.5374	TCGA-S9-A7QW-01
GBMLGG(N=520)	4	3.47	TCGA-P5-A733-01
GBMLGG(N=520)	6	4.178	TCGA-E1-A7Z4-01
GBMLGG(N=520)	0	4.1449	TCGA-FG-8185-01
GBMLGG(N=520)	2	4.7318	TCGA-HW-8320-01
GBMLGG(N=520)	2	4.0162	TCGA-CS-6667-01
GBMLGG(N=520)	2	4.2684	TCGA-DB-5279-01
GBMLGG(N=520)	2	4.7714	TCGA-06-0190-01
GBMLGG(N=520)	2	4.0506	TCGA-CS-6670-01
GBMLGG(N=520)	8	3.8033	TCGA-DB-A64V-01
GBMLGG(N=520)	0	4.0225	TCGA-06-0745-01
GBMLGG(N=520)	1	4.5497	TCGA-DU-5854-01
GBMLGG(N=520)	24	4.3772	TCGA-DH-A7UR-01
GBMLGG(N=520)	3	4.5361	TCGA-S9-A6WL-01
GBMLGG(N=520)	2	4.0943	TCGA-HT-7880-01
GBMLGG(N=520)	1	4.1899	TCGA-26-5135-01
GBMLGG(N=520)	3	4.2396	TCGA-E1-5318-01
GBMLGG(N=520)	11	4.8445	TCGA-DU-6393-01
GBMLGG(N=520)	4	4.1119	TCGA-41-3915-01
GBMLGG(N=520)	0	4.5952	TCGA-TM-A84J-01
GBMLGG(N=520)	3	4.4686	TCGA-FG-5962-01
GBMLGG(N=520)	7	1.8957	TCGA-27-1831-01
GBMLGG(N=520)	0	4.3548	TCGA-F6-A8O4-01
GBMLGG(N=520)	0	4.8851	TCGA-28-1753-01
GBMLGG(N=520)	1	3.8218	TCGA-S9-A7R1-01
GBMLGG(N=520)	6	3.245	TCGA-12-5295-01
GBMLGG(N=520)	0	4.756	TCGA-TM-A84M-01
GBMLGG(N=520)	1	4.3119	TCGA-P5-A5ET-01
GBMLGG(N=520)	2	3.9801	TCGA-P5-A72W-01
GBMLGG(N=520)	0	4.3242	TCGA-FG-A70Y-01
GBMLGG(N=520)	2	4.565	TCGA-HW-A5KM-01
GBMLGG(N=520)	2	4.3406	TCGA-FG-A87Q-01
GBMLGG(N=520)	0	4.673	TCGA-FG-A4MU-01
GBMLGG(N=520)	1	5.2262	TCGA-DB-A4XB-01
GBMLGG(N=520)	0	4.3827	TCGA-WY-A85D-01
GBMLGG(N=520)	1	4.131	TCGA-FG-6689-01
GBMLGG(N=520)	2	4.6502	TCGA-DB-5277-01
GBMLGG(N=520)	1	4.1571	TCGA-28-5204-01
GBMLGG(N=520)	0	4.5466	TCGA-HT-A615-01
GBMLGG(N=520)	4	4.5398	TCGA-DU-7301-01
GBMLGG(N=520)	1	4.5657	TCGA-P5-A5EW-01
GBMLGG(N=520)	132	5.1165	TCGA-06-2569-01
GBMLGG(N=520)	12	4.1796	TCGA-HT-A5RB-01
GBMLGG(N=520)	3	4.7751	TCGA-E1-A7YN-01
GBMLGG(N=520)	1	4.3869	TCGA-QH-A6XC-01
GBMLGG(N=520)	0	4.6288	TCGA-06-2559-01
GBMLGG(N=520)	7	4.9336	TCGA-S9-A6WN-01
GBMLGG(N=520)	0	4.2921	TCGA-DB-A64L-01
GBMLGG(N=520)	4	4.8812	TCGA-TM-A84I-01
GBMLGG(N=520)	0	4.2965	TCGA-QH-A6CZ-01
GBMLGG(N=520)	3	3.794	TCGA-WY-A858-01
GBMLGG(N=520)	2	4.3031	TCGA-VM-A8CB-01
GBMLGG(N=520)	2	2.7161	TCGA-27-2526-01
GBMLGG(N=520)	0	3.5694	TCGA-VM-A8CF-01
GBMLGG(N=520)	0	4.4713	TCGA-06-5856-01
GBMLGG(N=520)	1	3.7367	TCGA-HT-7608-01
GBMLGG(N=520)	22	4.1482	TCGA-CS-4938-01
GBMLGG(N=520)	0	3.8905	TCGA-QH-A6X5-01
GBMLGG(N=520)	4	4.84	TCGA-DU-8166-01
GBMLGG(N=520)	3	4.8694	TCGA-HT-8018-01
GBMLGG(N=520)	0	4.63	TCGA-DU-7292-01
GBMLGG(N=520)	1	3.6635	TCGA-06-5418-01
GBMLGG(N=520)	80	5.0409	TCGA-FG-6691-01
GBMLGG(N=520)	5	4.7597	TCGA-DU-6399-01
GBMLGG(N=520)	0	4.4033	TCGA-S9-A7IQ-01
GBMLGG(N=520)	0	4.5802	TCGA-06-5414-01
GBMLGG(N=520)	0	3.9204	TCGA-S9-A6WI-01
GBMLGG(N=520)	2	4.2987	TCGA-DB-A64S-01
GBMLGG(N=520)	1	4.2204	TCGA-FG-6692-01
GBMLGG(N=520)	0	4.2358	TCGA-HW-7489-01
GBMLGG(N=520)	0	4.656	TCGA-R8-A6YH-01
GBMLGG(N=520)	14	3.9691	TCGA-06-5417-01
GBMLGG(N=520)	0	4.4938	TCGA-HT-A618-01
GBMLGG(N=520)	3	1.5854	TCGA-26-5134-01
GBMLGG(N=520)	5	3.9829	TCGA-QH-A65S-01
GBMLGG(N=520)	3	4.2899	TCGA-DU-7019-01
GBMLGG(N=520)	2	5.037	TCGA-76-4925-01
GBMLGG(N=520)	12	4.5255	TCGA-TM-A84H-01
GBMLGG(N=520)	0	4.2877	TCGA-S9-A7R8-01
GBMLGG(N=520)	5	4.641	TCGA-S9-A7J3-01
GBMLGG(N=520)	5	4.3292	TCGA-TM-A84L-01
GBMLGG(N=520)	1	4.3632	TCGA-E1-A7YH-01
GBMLGG(N=520)	2	4.5009	TCGA-06-5413-01
GBMLGG(N=520)	1	4.6759	TCGA-06-0646-01
GBMLGG(N=520)	8	4.5261	TCGA-P5-A5EV-01
GBMLGG(N=520)	2	5.0553	TCGA-DU-A7TD-01
GBMLGG(N=520)	1	4.0046	TCGA-HW-A5KL-01
GBMLGG(N=520)	0	4.3834	TCGA-RY-A83X-01
GBMLGG(N=520)	2	4.9031	TCGA-HT-7687-01
GBMLGG(N=520)	5	4.2009	TCGA-WY-A85A-01
GBMLGG(N=520)	13	4.8385	TCGA-DB-5281-01
GBMLGG(N=520)	1	4.421	TCGA-E1-A7YK-01
GBMLGG(N=520)	19	4.5802	TCGA-DU-A7TA-01
GBMLGG(N=520)	0	4.862	TCGA-CS-5395-01
GBMLGG(N=520)	2	4.5349	TCGA-TQ-A7RR-01
GBMLGG(N=520)	2	3.8808	TCGA-12-0616-01
GBMLGG(N=520)	2	3.83	TCGA-QH-A65V-01
GBMLGG(N=520)	5	4.3046	TCGA-S9-A6WP-01
GBMLGG(N=520)	4	4.4602	TCGA-19-2620-01
GBMLGG(N=520)	4	4.0532	TCGA-S9-A6U5-01
GBMLGG(N=520)	1	4.6854	TCGA-E1-A7YO-01
GBMLGG(N=520)	1	4.8625	TCGA-QH-A6X8-01
GBMLGG(N=520)	9	4.5687	TCGA-HT-7875-01
GBMLGG(N=520)	1	3.9608	TCGA-16-0846-01
GBMLGG(N=520)	0	3.8269	TCGA-R8-A6MK-01
GBMLGG(N=520)	4	4.481	TCGA-P5-A5F0-01
GBMLGG(N=520)	20	4.7437	TCGA-02-0047-01
GBMLGG(N=520)	8	3.74	TCGA-S9-A6TW-01
GBMLGG(N=520)	3	3.9002	TCGA-E1-5303-01
GBMLGG(N=520)	0	4.4549	TCGA-HT-7606-01
GBMLGG(N=520)	0	4.4634	TCGA-DU-6408-01
GBMLGG(N=520)	4	4.1946	TCGA-FG-5964-01
GBMLGG(N=520)	2	4.5754	TCGA-DB-A64Q-01
GBMLGG(N=520)	11	4.481	TCGA-S9-A7IZ-01
GBMLGG(N=520)	12	4.096	TCGA-S9-A6WH-01
GBMLGG(N=520)	8	4.656	TCGA-19-2624-01
GBMLGG(N=520)	7	4.3335	TCGA-DU-A6S8-01
GBMLGG(N=520)	1	4.3972	TCGA-HT-7858-01
GBMLGG(N=520)	0	4.3604	TCGA-32-1982-01
GBMLGG(N=520)	0	4.1194	TCGA-S9-A6WD-01
GBMLGG(N=520)	4	4.4183	TCGA-27-1835-01
GBMLGG(N=520)	4	5.0747	TCGA-HT-7860-01
GBMLGG(N=520)	2	5.2025	TCGA-DU-7006-01
GBMLGG(N=520)	5	4.3321	TCGA-TQ-A7RS-01
GBMLGG(N=520)	0	4.3119	TCGA-DU-7009-01
GBMLGG(N=520)	2	4.6136	TCGA-06-0747-01
GBMLGG(N=520)	13	4.8405	TCGA-DU-7010-01
GBMLGG(N=520)	1	4.2892	TCGA-QH-A6X3-01
GBMLGG(N=520)	3	4.9575	TCGA-DU-8164-01
GBMLGG(N=520)	11	3.9737	TCGA-DU-7018-01
GBMLGG(N=520)	0	4.3744	TCGA-RY-A843-01
GBMLGG(N=520)	4	4.6571	TCGA-HT-7693-01
GBMLGG(N=520)	1	3.3047	TCGA-FG-A6J3-01
GBMLGG(N=520)	0	4.061	TCGA-28-5220-01
GBMLGG(N=520)	2	4.6445	TCGA-HT-7472-01
GBMLGG(N=520)	3	3.3148	TCGA-14-0817-01
GBMLGG(N=520)	4	4.2556	TCGA-HT-7855-01
GBMLGG(N=520)	14	4.3814	TCGA-06-2570-01
GBMLGG(N=520)	3	4.8545	TCGA-DB-A4XG-01
GBMLGG(N=520)	2	4.6702	TCGA-HT-A5RC-01
GBMLGG(N=520)	2	4.4061	TCGA-HT-7681-01
GBMLGG(N=520)	3	4.6588	TCGA-41-4097-01
GBMLGG(N=520)	1	4.2684	TCGA-DU-A6S2-01
GBMLGG(N=520)	0	4.0739	TCGA-DU-7309-01
GBMLGG(N=520)	2	3.6219	TCGA-DB-A4XH-01
GBMLGG(N=520)	1	4.4162	TCGA-VW-A7QS-01
GBMLGG(N=520)	5	4.65909	TCGA-06-0211-01
GBMLGG(N=520)	2	4.1466	TCGA-VV-A86M-01
GBMLGG(N=520)	21	4.322	TCGA-E1-A7YV-01
GBMLGG(N=520)	0	4.8778	TCGA-HT-7468-01
GBMLGG(N=520)	4	4.0091	TCGA-02-2483-01
GBMLGG(N=520)	2	4.958	TCGA-HT-7677-01
GBMLGG(N=520)	15	4.2616	TCGA-DU-A5TY-01
GBMLGG(N=520)	1	4.2495	TCGA-HT-8109-01
GBMLGG(N=520)	24	3.97	TCGA-HT-7479-01
GBMLGG(N=520)	9	4.4913	TCGA-DB-5275-01
GBMLGG(N=520)	0	4.2389	TCGA-TM-A7C4-01
GBMLGG(N=520)	0	4.6393	TCGA-27-2523-01
GBMLGG(N=520)	8	4.4562	TCGA-27-1837-01
GBMLGG(N=520)	0	4.449	TCGA-DH-A7UU-01
GBMLGG(N=520)	28	3.6324	TCGA-06-0744-01
GBMLGG(N=520)	2	4.6212	TCGA-FG-A4MT-01
GBMLGG(N=520)	2	4.4357	TCGA-E1-5305-01
GBMLGG(N=520)	0	4.1644	TCGA-CS-5393-01
GBMLGG(N=520)	1	4.0799	TCGA-DU-6395-01
GBMLGG(N=520)	0	3.834	TCGA-DB-A64X-01
GBMLGG(N=520)	0	4.3938	TCGA-S9-A7IS-01
GBMLGG(N=520)	0	3.5149	TCGA-32-5222-01
GBMLGG(N=520)	0	4.0532	TCGA-QH-A6XA-01
GBMLGG(N=520)	9	3.8944	TCGA-P5-A77W-01
GBMLGG(N=520)	5	4.4887	TCGA-27-2519-01
GBMLGG(N=520)	0	4.6657	TCGA-CS-6186-01
GBMLGG(N=520)	3	4.7603	TCGA-DU-7008-01
GBMLGG(N=520)	35	4.5361	TCGA-HT-7688-01
GBMLGG(N=520)	0	4.4196	TCGA-DU-A7T8-01
GBMLGG(N=520)	0	3.6335	TCGA-DU-A6S3-01
GBMLGG(N=520)	3	4.481	TCGA-DB-A64U-01
GBMLGG(N=520)	1	4.4823	TCGA-HT-A61C-01
GBMLGG(N=520)	11	4.5736	TCGA-12-0821-01
GBMLGG(N=520)	0	4.1474	TCGA-TQ-A7RF-01
GBMLGG(N=520)	19	4.7913	TCGA-19-2619-01
GBMLGG(N=520)	0	4.9041	TCGA-F6-A8O3-01
GBMLGG(N=520)	0	4.2803	TCGA-R8-A6ML-01
GBMLGG(N=520)	1	4.3349	TCGA-DU-A5TT-01
GBMLGG(N=520)	4	4.3031	TCGA-QH-A870-01
GBMLGG(N=520)	5	4.0064	TCGA-DB-A75O-01
GBMLGG(N=520)	1	4.6416	TCGA-HT-8111-01
GBMLGG(N=520)	21	4.5342	TCGA-S9-A7QZ-01
GBMLGG(N=520)	10	4.4926	TCGA-HT-7470-01
GBMLGG(N=520)	0	4.0331	TCGA-FG-A4MY-01
GBMLGG(N=520)	2	4.6838	TCGA-HT-8108-01
GBMLGG(N=520)	3	4.6651	TCGA-DB-A4XE-01
GBMLGG(N=520)	0	3.551	TCGA-HT-A4DS-01
GBMLGG(N=520)	0	4.7132	TCGA-DU-8158-01
GBMLGG(N=520)	3	4.4357	TCGA-HT-7474-01
GBMLGG(N=520)	1	4.1523	TCGA-DH-5143-01
GBMLGG(N=520)	1	4.4317	TCGA-TQ-A7RJ-01
GBMLGG(N=520)	0	4.0627	TCGA-DB-A4XA-01
GBMLGG(N=520)	1	4.0653	TCGA-P5-A731-01
GBMLGG(N=520)	3	4.3126	TCGA-FG-A710-01
GBMLGG(N=520)	1	3.7919	TCGA-HT-8010-01
GBMLGG(N=520)	6	4.4476	TCGA-DU-7299-01
GBMLGG(N=520)	4	4.4463	TCGA-DB-5270-01
GBMLGG(N=520)	3	5.0299	TCGA-14-0789-01
GBMLGG(N=520)	0	4.2766	TCGA-KT-A74X-01
GBMLGG(N=520)	2	4.433	TCGA-DB-A75L-01
GBMLGG(N=520)	0	4.4357	TCGA-HT-A616-01
GBMLGG(N=520)	9	3.7971	TCGA-HT-A74K-01
GBMLGG(N=520)	21	4.178	TCGA-WY-A85C-01
GBMLGG(N=520)	0	4.4595	TCGA-FG-8188-01
GBMLGG(N=520)	4	4.7777	TCGA-DU-A6S7-01
GBMLGG(N=520)	74	2.7139	TCGA-DB-5274-01
GBMLGG(N=520)	18	4.7971	TCGA-28-5209-01
GBMLGG(N=520)	2	4.7756	TCGA-HT-7604-01
GBMLGG(N=520)	9	4.131	TCGA-TM-A84F-01
GBMLGG(N=520)	4	4.2381	TCGA-DB-A64O-01
GBMLGG(N=520)	18	4.4263	TCGA-HT-7884-01
GBMLGG(N=520)	9	4.2943	TCGA-S9-A6WE-01
GBMLGG(N=520)	6	4.6866	TCGA-S9-A6WM-01
GBMLGG(N=520)	12	4.7231	TCGA-28-5218-01
GBMLGG(N=520)	1	4.9607	TCGA-HT-A5RA-01
GBMLGG(N=520)	0	4.5336	TCGA-DU-5852-01
GBMLGG(N=520)	10	4.7464	TCGA-28-2514-01
GBMLGG(N=520)	1	4.0627	TCGA-06-5859-01
GBMLGG(N=520)	7	4.3834	TCGA-DB-A75K-01
GBMLGG(N=520)	0	4.4397	TCGA-DU-6410-01
GBMLGG(N=520)	3	4.5632	TCGA-28-2509-01
GBMLGG(N=520)	15	4.2072	TCGA-QH-A65Z-01
GBMLGG(N=520)	5	3.8729	TCGA-S9-A7IY-01
GBMLGG(N=520)	3	4.0019	TCGA-P5-A781-01
GBMLGG(N=520)	0	5.0536	TCGA-TM-A84G-01
GBMLGG(N=520)	6	4.3667	TCGA-HW-A5KK-01
GBMLGG(N=520)	0	4.9055	TCGA-FG-7634-01
GBMLGG(N=520)	0	4.0653	TCGA-DU-5855-01
GBMLGG(N=520)	7	4.7377	TCGA-DU-6396-01
GBMLGG(N=520)	0	4.2601	TCGA-19-4065-01
GBMLGG(N=520)	5	4.2743	TCGA-FG-7643-01
GBMLGG(N=520)	79	4.5392	TCGA-TM-A84C-01
GBMLGG(N=520)	2	4.2304	TCGA-02-2485-01
GBMLGG(N=520)	3	4.1684	TCGA-WY-A85E-01
GBMLGG(N=520)	9	3.1908	TCGA-12-1597-01
GBMLGG(N=520)	6	4.656	TCGA-28-1747-01
GBMLGG(N=520)	26	4.6474	TCGA-DU-7298-01
GBMLGG(N=520)	0	4.0575	TCGA-TM-A84T-01
GBMLGG(N=520)	1	4.3082	TCGA-FG-7637-01
GBMLGG(N=520)	8	4.2892	TCGA-HT-A5R9-01
GBMLGG(N=520)	4	4.5142	TCGA-HT-A614-01
GBMLGG(N=520)	5	4.2009	TCGA-06-0649-01
GBMLGG(N=520)	1	4.1153	TCGA-QH-A65R-01
GBMLGG(N=520)	0	5.109	TCGA-06-2564-01
GBMLGG(N=520)	0	4.7415	TCGA-06-5408-01
GBMLGG(N=520)	9	3.6827	TCGA-27-1832-01
GBMLGG(N=520)	4	4.6747	TCGA-32-2615-01
GBMLGG(N=520)	11	4.8284	TCGA-06-0158-01
GBMLGG(N=520)	4	4.9769	TCGA-HT-7882-01
GBMLGG(N=520)	2	4.309	TCGA-HT-8011-01
GBMLGG(N=520)	28	4.8125	TCGA-DU-6394-01
GBMLGG(N=520)	2	4.178	TCGA-28-5216-01
GBMLGG(N=520)	0	4.5466	TCGA-WY-A859-01
GBMLGG(N=520)	7	4.6101	TCGA-S9-A6UB-01
GBMLGG(N=520)	3	4.735	TCGA-28-5207-01
GBMLGG(N=520)	0	4.3793	TCGA-S9-A6U6-01
GBMLGG(N=520)	7	5.0317	TCGA-DU-8168-01
GBMLGG(N=520)	5	5.1946	TCGA-06-0130-01
GBMLGG(N=520)	0	4.6977	TCGA-DU-7290-01
GBMLGG(N=520)	89	3.6125	TCGA-06-5416-01
GBMLGG(N=520)	1	3.4804	TCGA-06-0168-01
GBMLGG(N=520)	1	4.4958	TCGA-DU-6407-01
GBMLGG(N=520)	5	4.8038	TCGA-HT-7601-01
GBMLGG(N=520)	2	4.735	TCGA-DU-6403-01
GBMLGG(N=520)	1	4.1466	TCGA-06-5415-01
GBMLGG(N=520)	1	4.6938	TCGA-E1-A7YQ-01
GBMLGG(N=520)	12	4.9402	TCGA-DU-6405-01
GBMLGG(N=520)	5	4.6	TCGA-S9-A7J1-01
GBMLGG(N=520)	0	4.2419	TCGA-P5-A72X-01
GBMLGG(N=520)	1	4.7496	TCGA-E1-A7YJ-01
GBMLGG(N=520)	3	4.4562	TCGA-26-5139-01
GBMLGG(N=520)	1	4.783	TCGA-HT-7690-01
GBMLGG(N=520)	27	4.4751	TCGA-HT-8105-01
GBMLGG(N=520)	7	4.2862	TCGA-76-4928-01
GBMLGG(N=520)	9	4.6702	TCGA-06-0644-01
GBMLGG(N=520)	1	4.6236	TCGA-E1-A7YY-01
GBMLGG(N=520)	2	4.3786	TCGA-DU-6400-01
GBMLGG(N=520)	1	3.705	TCGA-P5-A737-01
GBMLGG(N=520)	0	4.0091	TCGA-14-0871-01
GBMLGG(N=520)	2	4.3349	TCGA-RY-A83Y-01
GBMLGG(N=520)	130	4.906	TCGA-HT-8564-01
GBMLGG(N=520)	7	4.5596	TCGA-HT-7686-01
GBMLGG(N=520)	2	4.1571	TCGA-E1-A7YM-01
GBMLGG(N=520)	0	4.001	TCGA-DH-A66F-01
GBMLGG(N=520)	1	4.5053	TCGA-CS-5390-01
GBMLGG(N=520)	0	5.0657	TCGA-S9-A6UA-01
GBMLGG(N=520)	0	4.9113	TCGA-FG-A87N-01
GBMLGG(N=520)	2	3.9838	TCGA-VV-A829-01
GBMLGG(N=520)	14	4.4615	TCGA-DH-A66B-01
GBMLGG(N=520)	0	4.306	TCGA-HT-A5R7-01
GBMLGG(N=520)	4	4.677	TCGA-CS-5394-01
GBMLGG(N=520)	9	4.7861	TCGA-DH-A66D-01
GBMLGG(N=520)	6	4.3653	TCGA-HT-7877-01
GBMLGG(N=520)	0	4.7187	TCGA-06-0882-01
GBMLGG(N=520)	0	4.8435	TCGA-DU-6542-01
GBMLGG(N=520)	9	4.3421	TCGA-QH-A6CS-01
GBMLGG(N=520)	6	4.2899	TCGA-W9-A837-01
GBMLGG(N=520)	0	4.5274	TCGA-IK-7675-01
GBMLGG(N=520)	1	4.1384	TCGA-DU-7306-01
GBMLGG(N=520)	0	4.5559	TCGA-QH-A6X9-01
GBMLGG(N=520)	2	4.7209	TCGA-HT-7611-01
GBMLGG(N=520)	1	4.1716	TCGA-DU-A7TB-01
GBMLGG(N=520)	0	4.1285	TCGA-19-2625-01
GBMLGG(N=520)	8	4.2526	TCGA-IK-8125-01
GBMLGG(N=520)	6	3.6405	TCGA-WH-A86K-01
GBMLGG(N=520)	2	3.7061	TCGA-FG-A60L-01
GBMLGG(N=520)	0	4.859	TCGA-DB-5280-01
GBMLGG(N=520)	4	4.373	TCGA-S9-A7IX-01
GBMLGG(N=520)	4	4.6012	TCGA-FG-5965-01
GBMLGG(N=520)	0	4.5964	TCGA-27-1834-01
GBMLGG(N=520)	4	5.2107	TCGA-DU-7007-01
GBMLGG(N=520)	7	3.9992	TCGA-HW-7490-01
GBMLGG(N=520)	0	4.5675	TCGA-CS-6188-01
GBMLGG(N=520)	2	4.8944	TCGA-CS-6668-01
GBMLGG(N=520)	0	5.3615	TCGA-DU-8165-01
GBMLGG(N=520)	4	3.3076	TCGA-HT-7692-01
GBMLGG(N=520)	5	4.7077	TCGA-TQ-A7RM-01
GBMLGG(N=520)	1	5.1231	TCGA-DU-8161-01
GBMLGG(N=520)	6	3.9308	TCGA-P5-A736-01
GBMLGG(N=520)	39	4.1547	TCGA-DU-6401-01
GBMLGG(N=520)	3	3.8095	TCGA-HT-A74H-01
GBMLGG(N=520)	0	3.7836	TCGA-41-2571-01
GBMLGG(N=520)	2	4.5236	TCGA-TQ-A7RV-01
GBMLGG(N=520)	5	4.7005	TCGA-14-0781-01
GBMLGG(N=520)	0	3.9421	TCGA-HT-7620-01
GBMLGG(N=520)	1	4.7735	TCGA-HT-7480-01
GBMLGG(N=520)	8	4.439	TCGA-06-0157-01
GBMLGG(N=520)	10	4.9379	TCGA-S9-A7J0-01
GBMLGG(N=520)	2	4.6623	TCGA-12-3653-01
GBMLGG(N=520)	5	4.8987	TCGA-TM-A84Q-01
GBMLGG(N=520)	3	4.7318	TCGA-76-4926-01
GBMLGG(N=520)	2	4.4932	TCGA-26-5133-01
GBMLGG(N=520)	13	4.7851	TCGA-06-2562-01
GBMLGG(N=520)	0	3.9534	TCGA-RY-A847-01
GBMLGG(N=520)	8	4.4377	TCGA-TQ-A7RQ-01
GBMLGG(N=520)	0	4.8729	TCGA-TQ-A7RW-01
GBMLGG(N=520)	4	4.5711	TCGA-E1-A7YW-01
GBMLGG(N=520)	16	4.8817	TCGA-E1-A7YS-01
GBMLGG(N=520)	1	4.4641	TCGA-DU-7012-01
GBMLGG(N=520)	6	4.6977	TCGA-HT-7879-01
GBMLGG(N=520)	9	3.9232	TCGA-DU-A7TC-01
GBMLGG(N=520)	17	3.87	TCGA-27-2521-01
GBMLGG(N=520)	23	4.504	TCGA-DB-A4X9-01
GBMLGG(N=520)	3	4.7154	TCGA-TQ-A7RI-01
GBMLGG(N=520)	10	4.3177	TCGA-TM-A7CA-01
GBMLGG(N=520)	4	4.5053	TCGA-QH-A86X-01
GBMLGG(N=520)	0	4.3917	TCGA-DU-A76R-01
GBMLGG(N=520)	0	4.5711	TCGA-E1-A7Z2-01
GBMLGG(N=520)	6	4.4417	TCGA-06-0210-01
GBMLGG(N=520)	1	3.8228	TCGA-FG-8187-01
GBMLGG(N=520)	2	4.9002	TCGA-E1-5304-01
GBMLGG(N=520)	9	4.8202	TCGA-19-5960-01
GBMLGG(N=520)	1	4.1327	TCGA-06-0686-01
GBMLGG(N=520)	16	4.7725	TCGA-DH-5140-01
GBMLGG(N=520)	1	4.1252	TCGA-TM-A7CF-01
GBMLGG(N=520)	0	4.3039	TCGA-HT-A61B-01
GBMLGG(N=520)	0	4.2892	TCGA-E1-A7Z6-01
GBMLGG(N=520)	7	4.8525	TCGA-HT-7857-01
GBMLGG(N=520)	11	4.0985	TCGA-E1-5319-01
GBMLGG(N=520)	0	3.4477	TCGA-DU-A5TS-01
GBMLGG(N=520)	356	5.0709	TCGA-DU-6392-01
GBMLGG(N=520)	5	3.4477	TCGA-QH-A6CU-01
GBMLGG(N=520)	1	3.47	TCGA-VW-A8FI-01
GBMLGG(N=520)	2	3.492	TCGA-P5-A5EZ-01
GBMLGG(N=520)	3	4.0636	TCGA-S9-A89Z-01
GBMLGG(N=520)	8	4.6921	TCGA-S9-A6TZ-01
GBMLGG(N=520)	1	4.6177	TCGA-FG-5963-01
GBMLGG(N=520)	12	4.6195	TCGA-S9-A89V-01
GBMLGG(N=520)	6	4.5832	TCGA-DB-A64W-01
GBMLGG(N=520)	0	2.8681	TCGA-FG-A4MX-01
GBMLGG(N=520)	1	4.9915	TCGA-P5-A72Z-01
GBMLGG(N=520)	1	4.8699	TCGA-HT-8114-01
GBMLGG(N=520)	4	2.2452	TCGA-32-4213-01
GBMLGG(N=520)	0	4.3855	TCGA-HT-7881-01
GBMLGG(N=520)	0	4.4061	TCGA-15-0742-01
GBMLGG(N=520)	0	3.4183	TCGA-CS-4944-01
GBMLGG(N=520)	0	4.7704	TCGA-06-0187-01
GBMLGG(N=520)	0	4.9887	TCGA-19-1390-01
GBMLGG(N=520)	1	3.9654	TCGA-S9-A7QX-01
GBMLGG(N=520)	1	4.0549	TCGA-DU-A7TG-01
GBMLGG(N=520)	0	4.7022	TCGA-DU-5874-01
GBMLGG(N=520)	0	4.5047	TCGA-TQ-A8XE-01
GBMLGG(N=520)	19	4.3299	TCGA-DU-7300-01
GBMLGG(N=520)	14	4.3896	TCGA-HT-7694-01
GBMLGG(N=520)	0	4.926	TCGA-HT-7471-01
GBMLGG(N=520)	16	4.6077	TCGA-DB-A4XD-01
GBMLGG(N=520)	3	4.4074	TCGA-TQ-A7RK-01
GBMLGG(N=520)	31	4.1523	TCGA-HT-7475-01
GBMLGG(N=520)	31	4.6247	TCGA-HT-7902-01
GBMLGG(N=520)	7	4.3463	TCGA-FG-A711-01
GBMLGG(N=520)	13	4.4874	TCGA-06-2557-01
GBMLGG(N=520)	15	4.5091	TCGA-DB-5276-01
GBMLGG(N=520)	0	4.8213	TCGA-E1-A7YD-01
GBMLGG(N=520)	9	3.9874	TCGA-HT-A74O-01
GBMLGG(N=520)	8	4.8655	TCGA-06-0878-01
GBMLGG(N=520)	21	4.2427	TCGA-DH-A669-01
GBMLGG(N=520)	4	4.7929	TCGA-06-0129-01
GBMLGG(N=520)	14	4.9336	TCGA-16-1045-01
GBMLGG(N=520)	8	4.4364	TCGA-06-2567-01
GBMLGG(N=520)	0	4.1636	TCGA-HT-7605-01
GBMLGG(N=520)	1	4.5946	TCGA-S9-A6WO-01
GBMLGG(N=520)	0	4.1962	TCGA-28-5208-01
GBMLGG(N=520)	2	3.867	TCGA-QH-A6CX-01
GBMLGG(N=520)	0	2.8955	TCGA-14-2554-01
GBMLGG(N=520)	0	4.2624	TCGA-P5-A5F4-01
GBMLGG(N=520)	4	4.2266	TCGA-DU-A76K-01
GBMLGG(N=520)	0	4.3744	TCGA-VM-A8CH-01
GBMLGG(N=520)	3	4.166	TCGA-27-2528-01
GBMLGG(N=520)	4	4.4047	TCGA-QH-A6X4-01
GBMLGG(N=520)	38	4.2676	TCGA-DH-A7UV-01
GBMLGG(N=520)	0	3.8729	TCGA-TM-A7C3-01
GBMLGG(N=520)	0	4.8958	TCGA-06-5858-01
GBMLGG(N=520)	10	3.9337	TCGA-DU-8167-01
GBMLGG(N=520)	16	4.222	TCGA-QH-A65X-01
GBMLGG(N=520)	1	4.641	TCGA-E1-5302-01
GBMLGG(N=520)	25	2.9618	TCGA-HW-A5KJ-01
GBMLGG(N=520)	6	4.1466	TCGA-FG-7636-01
GBMLGG(N=520)	0	4.2862	TCGA-DU-5847-01
GBMLGG(N=520)	6	3.9571	TCGA-06-0743-01
GBMLGG(N=520)	0	4.9524	TCGA-TM-A84B-01
GBMLGG(N=520)	1	4.4861	TCGA-DU-A76O-01
LGG(N=403)	4	4.5349	TCGA-S9-A7J2-01
LGG(N=403)	2	4.7426	TCGA-E1-A7YI-01
LGG(N=403)	14	4.7016	TCGA-DU-7302-01
LGG(N=403)	2	4.2533	TCGA-P5-A5EX-01
LGG(N=403)	14	4.4874	TCGA-FG-A60K-01
LGG(N=403)	0	5.1526	TCGA-CS-5397-01
LGG(N=403)	4	4.5862	TCGA-E1-5322-01
LGG(N=403)	0	4.5305	TCGA-HT-7854-01
LGG(N=403)	3	4.1716	TCGA-HT-7467-01
LGG(N=403)	0	4.2373	TCGA-HT-7874-01
LGG(N=403)	1	4.2987	TCGA-VM-A8CD-01
LGG(N=403)	3	4.4938	TCGA-HT-7616-01
LGG(N=403)	1	4.691	TCGA-KT-A7W1-01
LGG(N=403)	1	4.3442	TCGA-P5-A5F2-01
LGG(N=403)	1	4.2025	TCGA-HT-7607-01
LGG(N=403)	5	4.9612	TCGA-HT-7873-01
LGG(N=403)	2	4.197	TCGA-DB-A64P-01
LGG(N=403)	3	3.8401	TCGA-DU-7011-01
LGG(N=403)	10	3.7961	TCGA-P5-A77X-01
LGG(N=403)	4	3.8759	TCGA-VM-A8CA-01
LGG(N=403)	3	4.4183	TCGA-DU-7015-01
LGG(N=403)	0	4.2995	TCGA-TM-A84O-01
LGG(N=403)	4	4.1409	TCGA-S9-A7R3-01
LGG(N=403)	13	4.281	TCGA-DU-A6S6-01
LGG(N=403)	33	4.4437	TCGA-P5-A735-01
LGG(N=403)	0	3.4384	TCGA-FG-A6J1-01
LGG(N=403)	13	5.0308	TCGA-S9-A7R7-01
LGG(N=403)	3	4.8465	TCGA-DU-6402-01
LGG(N=403)	0	3.2885	TCGA-HT-7684-01
LGG(N=403)	4	4.8954	TCGA-HT-8104-01
LGG(N=403)	55	4.4615	TCGA-FN-7833-01
LGG(N=403)	1	4.7592	TCGA-HT-7473-01
LGG(N=403)	5	4.306	TCGA-DB-A4XF-01
LGG(N=403)	5	4.4304	TCGA-FG-A713-01
LGG(N=403)	2	4.2556	TCGA-E1-A7YL-01
LGG(N=403)	1	4.964	TCGA-CS-5396-01
LGG(N=403)	8	4.783	TCGA-HW-8322-01
LGG(N=403)	4	4.0943	TCGA-S9-A6U9-01
LGG(N=403)	0	4.1466	TCGA-HT-7676-01
LGG(N=403)	1	4.7793	TCGA-HT-7469-01
LGG(N=403)	1	4.4938	TCGA-HT-7478-01
LGG(N=403)	1	4.497	TCGA-DU-A5TW-01
LGG(N=403)	14	3.945	TCGA-S9-A6TX-01
LGG(N=403)	6	3.981	TCGA-RY-A83Z-01
LGG(N=403)	0	3.5022	TCGA-FG-A6IZ-01
LGG(N=403)	1	4.327	TCGA-HW-8321-01
LGG(N=403)	0	4.9915	TCGA-EZ-7264-01
LGG(N=403)	0	4.4713	TCGA-CS-6666-01
LGG(N=403)	2	4.8074	TCGA-HW-7491-01
LGG(N=403)	1	4.7533	TCGA-S9-A6U1-01
LGG(N=403)	0	4.551	TCGA-E1-5307-01
LGG(N=403)	5	4.3292	TCGA-HW-7495-01
LGG(N=403)	1	4.1756	TCGA-HT-7481-01
LGG(N=403)	5	4.8763	TCGA-HT-8110-01
LGG(N=403)	18	4.7523	TCGA-QH-A6CW-01
LGG(N=403)	0	4.8017	TCGA-DU-5870-01
LGG(N=403)	0	4.918	TCGA-FG-8182-01
LGG(N=403)	3	4.2181	TCGA-FG-6688-01
LGG(N=403)	0	4.1859	TCGA-HT-8113-01
LGG(N=403)	1	4.5748	TCGA-HT-7689-01
LGG(N=403)	0	4.6323	TCGA-DU-7013-01
LGG(N=403)	3	4.5199	TCGA-E1-A7Z3-01
LGG(N=403)	1	3.8054	TCGA-HT-7476-01
LGG(N=403)	0	4.511	TCGA-TQ-A7RG-01
LGG(N=403)	20	4.2212	TCGA-DU-A7T6-01
LGG(N=403)	4	4.728	TCGA-DB-A4XC-01
LGG(N=403)	9	4.1636	TCGA-FG-A4MW-01
LGG(N=403)	1	4.3681	TCGA-DH-5142-01
LGG(N=403)	1	4.3855	TCGA-TQ-A7RH-01
LGG(N=403)	9	4.4758	TCGA-HT-8012-01
LGG(N=403)	0	4.5374	TCGA-S9-A7QW-01
LGG(N=403)	4	3.47	TCGA-P5-A733-01
LGG(N=403)	6	4.178	TCGA-E1-A7Z4-01
LGG(N=403)	0	4.1449	TCGA-FG-8185-01
LGG(N=403)	2	4.7318	TCGA-HW-8320-01
LGG(N=403)	2	4.0162	TCGA-CS-6667-01
LGG(N=403)	2	4.2684	TCGA-DB-5279-01
LGG(N=403)	2	4.0506	TCGA-CS-6670-01
LGG(N=403)	8	3.8033	TCGA-DB-A64V-01
LGG(N=403)	1	4.5497	TCGA-DU-5854-01
LGG(N=403)	24	4.3772	TCGA-DH-A7UR-01
LGG(N=403)	3	4.5361	TCGA-S9-A6WL-01
LGG(N=403)	2	4.0943	TCGA-HT-7880-01
LGG(N=403)	3	4.2396	TCGA-E1-5318-01
LGG(N=403)	11	4.8445	TCGA-DU-6393-01
LGG(N=403)	0	4.5952	TCGA-TM-A84J-01
LGG(N=403)	3	4.4686	TCGA-FG-5962-01
LGG(N=403)	0	4.3548	TCGA-F6-A8O4-01
LGG(N=403)	1	3.8218	TCGA-S9-A7R1-01
LGG(N=403)	0	4.756	TCGA-TM-A84M-01
LGG(N=403)	1	4.3119	TCGA-P5-A5ET-01
LGG(N=403)	2	3.9801	TCGA-P5-A72W-01
LGG(N=403)	0	4.3242	TCGA-FG-A70Y-01
LGG(N=403)	2	4.565	TCGA-HW-A5KM-01
LGG(N=403)	2	4.3406	TCGA-FG-A87Q-01
LGG(N=403)	0	4.673	TCGA-FG-A4MU-01
LGG(N=403)	1	5.2262	TCGA-DB-A4XB-01
LGG(N=403)	0	4.3827	TCGA-WY-A85D-01
LGG(N=403)	1	4.131	TCGA-FG-6689-01
LGG(N=403)	2	4.6502	TCGA-DB-5277-01
LGG(N=403)	0	4.5466	TCGA-HT-A615-01
LGG(N=403)	4	4.5398	TCGA-DU-7301-01
LGG(N=403)	1	4.5657	TCGA-P5-A5EW-01
LGG(N=403)	12	4.1796	TCGA-HT-A5RB-01
LGG(N=403)	3	4.7751	TCGA-E1-A7YN-01
LGG(N=403)	1	4.3869	TCGA-QH-A6XC-01
LGG(N=403)	7	4.9336	TCGA-S9-A6WN-01
LGG(N=403)	0	4.2921	TCGA-DB-A64L-01
LGG(N=403)	4	4.8812	TCGA-TM-A84I-01
LGG(N=403)	0	4.2965	TCGA-QH-A6CZ-01
LGG(N=403)	3	3.794	TCGA-WY-A858-01
LGG(N=403)	2	4.3031	TCGA-VM-A8CB-01
LGG(N=403)	0	3.5694	TCGA-VM-A8CF-01
LGG(N=403)	1	3.7367	TCGA-HT-7608-01
LGG(N=403)	22	4.1482	TCGA-CS-4938-01
LGG(N=403)	0	3.8905	TCGA-QH-A6X5-01
LGG(N=403)	4	4.84	TCGA-DU-8166-01
LGG(N=403)	3	4.8694	TCGA-HT-8018-01
LGG(N=403)	0	4.63	TCGA-DU-7292-01
LGG(N=403)	80	5.0409	TCGA-FG-6691-01
LGG(N=403)	5	4.7597	TCGA-DU-6399-01
LGG(N=403)	0	4.4033	TCGA-S9-A7IQ-01
LGG(N=403)	0	3.9204	TCGA-S9-A6WI-01
LGG(N=403)	2	4.2987	TCGA-DB-A64S-01
LGG(N=403)	1	4.2204	TCGA-FG-6692-01
LGG(N=403)	0	4.2358	TCGA-HW-7489-01
LGG(N=403)	0	4.656	TCGA-R8-A6YH-01
LGG(N=403)	0	4.4938	TCGA-HT-A618-01
LGG(N=403)	5	3.9829	TCGA-QH-A65S-01
LGG(N=403)	3	4.2899	TCGA-DU-7019-01
LGG(N=403)	12	4.5255	TCGA-TM-A84H-01
LGG(N=403)	0	4.2877	TCGA-S9-A7R8-01
LGG(N=403)	5	4.641	TCGA-S9-A7J3-01
LGG(N=403)	5	4.3292	TCGA-TM-A84L-01
LGG(N=403)	1	4.3632	TCGA-E1-A7YH-01
LGG(N=403)	8	4.5261	TCGA-P5-A5EV-01
LGG(N=403)	2	5.0553	TCGA-DU-A7TD-01
LGG(N=403)	1	4.0046	TCGA-HW-A5KL-01
LGG(N=403)	0	4.3834	TCGA-RY-A83X-01
LGG(N=403)	2	4.9031	TCGA-HT-7687-01
LGG(N=403)	5	4.2009	TCGA-WY-A85A-01
LGG(N=403)	13	4.8385	TCGA-DB-5281-01
LGG(N=403)	1	4.421	TCGA-E1-A7YK-01
LGG(N=403)	19	4.5802	TCGA-DU-A7TA-01
LGG(N=403)	0	4.862	TCGA-CS-5395-01
LGG(N=403)	2	4.5349	TCGA-TQ-A7RR-01
LGG(N=403)	2	3.83	TCGA-QH-A65V-01
LGG(N=403)	5	4.3046	TCGA-S9-A6WP-01
LGG(N=403)	4	4.0532	TCGA-S9-A6U5-01
LGG(N=403)	1	4.6854	TCGA-E1-A7YO-01
LGG(N=403)	1	4.8625	TCGA-QH-A6X8-01
LGG(N=403)	9	4.5687	TCGA-HT-7875-01
LGG(N=403)	0	3.8269	TCGA-R8-A6MK-01
LGG(N=403)	4	4.481	TCGA-P5-A5F0-01
LGG(N=403)	8	3.74	TCGA-S9-A6TW-01
LGG(N=403)	3	3.9002	TCGA-E1-5303-01
LGG(N=403)	0	4.4549	TCGA-HT-7606-01
LGG(N=403)	0	4.4634	TCGA-DU-6408-01
LGG(N=403)	4	4.1946	TCGA-FG-5964-01
LGG(N=403)	2	4.5754	TCGA-DB-A64Q-01
LGG(N=403)	11	4.481	TCGA-S9-A7IZ-01
LGG(N=403)	12	4.096	TCGA-S9-A6WH-01
LGG(N=403)	7	4.3335	TCGA-DU-A6S8-01
LGG(N=403)	1	4.3972	TCGA-HT-7858-01
LGG(N=403)	0	4.1194	TCGA-S9-A6WD-01
LGG(N=403)	4	5.0747	TCGA-HT-7860-01
LGG(N=403)	2	5.2025	TCGA-DU-7006-01
LGG(N=403)	5	4.3321	TCGA-TQ-A7RS-01
LGG(N=403)	0	4.3119	TCGA-DU-7009-01
LGG(N=403)	13	4.8405	TCGA-DU-7010-01
LGG(N=403)	1	4.2892	TCGA-QH-A6X3-01
LGG(N=403)	3	4.9575	TCGA-DU-8164-01
LGG(N=403)	11	3.9737	TCGA-DU-7018-01
LGG(N=403)	0	4.3744	TCGA-RY-A843-01
LGG(N=403)	4	4.6571	TCGA-HT-7693-01
LGG(N=403)	1	3.3047	TCGA-FG-A6J3-01
LGG(N=403)	2	4.6445	TCGA-HT-7472-01
LGG(N=403)	4	4.2556	TCGA-HT-7855-01
LGG(N=403)	3	4.8545	TCGA-DB-A4XG-01
LGG(N=403)	2	4.6702	TCGA-HT-A5RC-01
LGG(N=403)	2	4.4061	TCGA-HT-7681-01
LGG(N=403)	1	4.2684	TCGA-DU-A6S2-01
LGG(N=403)	0	4.0739	TCGA-DU-7309-01
LGG(N=403)	2	3.6219	TCGA-DB-A4XH-01
LGG(N=403)	1	4.4162	TCGA-VW-A7QS-01
LGG(N=403)	2	4.1466	TCGA-VV-A86M-01
LGG(N=403)	21	4.322	TCGA-E1-A7YV-01
LGG(N=403)	0	4.8778	TCGA-HT-7468-01
LGG(N=403)	2	4.958	TCGA-HT-7677-01
LGG(N=403)	15	4.2616	TCGA-DU-A5TY-01
LGG(N=403)	1	4.2495	TCGA-HT-8109-01
LGG(N=403)	24	3.97	TCGA-HT-7479-01
LGG(N=403)	9	4.4913	TCGA-DB-5275-01
LGG(N=403)	0	4.2389	TCGA-TM-A7C4-01
LGG(N=403)	0	4.449	TCGA-DH-A7UU-01
LGG(N=403)	2	4.6212	TCGA-FG-A4MT-01
LGG(N=403)	2	4.4357	TCGA-E1-5305-01
LGG(N=403)	0	4.1644	TCGA-CS-5393-01
LGG(N=403)	1	4.0799	TCGA-DU-6395-01
LGG(N=403)	0	3.834	TCGA-DB-A64X-01
LGG(N=403)	0	4.3938	TCGA-S9-A7IS-01
LGG(N=403)	0	4.0532	TCGA-QH-A6XA-01
LGG(N=403)	9	3.8944	TCGA-P5-A77W-01
LGG(N=403)	0	4.6657	TCGA-CS-6186-01
LGG(N=403)	3	4.7603	TCGA-DU-7008-01
LGG(N=403)	35	4.5361	TCGA-HT-7688-01
LGG(N=403)	0	4.4196	TCGA-DU-A7T8-01
LGG(N=403)	0	3.6335	TCGA-DU-A6S3-01
LGG(N=403)	3	4.481	TCGA-DB-A64U-01
LGG(N=403)	1	4.4823	TCGA-HT-A61C-01
LGG(N=403)	0	4.1474	TCGA-TQ-A7RF-01
LGG(N=403)	0	4.9041	TCGA-F6-A8O3-01
LGG(N=403)	0	4.2803	TCGA-R8-A6ML-01
LGG(N=403)	1	4.3349	TCGA-DU-A5TT-01
LGG(N=403)	4	4.3031	TCGA-QH-A870-01
LGG(N=403)	5	4.0064	TCGA-DB-A75O-01
LGG(N=403)	1	4.6416	TCGA-HT-8111-01
LGG(N=403)	21	4.5342	TCGA-S9-A7QZ-01
LGG(N=403)	10	4.4926	TCGA-HT-7470-01
LGG(N=403)	0	4.0331	TCGA-FG-A4MY-01
LGG(N=403)	2	4.6838	TCGA-HT-8108-01
LGG(N=403)	3	4.6651	TCGA-DB-A4XE-01
LGG(N=403)	0	3.551	TCGA-HT-A4DS-01
LGG(N=403)	0	4.7132	TCGA-DU-8158-01
LGG(N=403)	3	4.4357	TCGA-HT-7474-01
LGG(N=403)	1	4.1523	TCGA-DH-5143-01
LGG(N=403)	1	4.4317	TCGA-TQ-A7RJ-01
LGG(N=403)	0	4.0627	TCGA-DB-A4XA-01
LGG(N=403)	1	4.0653	TCGA-P5-A731-01
LGG(N=403)	3	4.3126	TCGA-FG-A710-01
LGG(N=403)	1	3.7919	TCGA-HT-8010-01
LGG(N=403)	6	4.4476	TCGA-DU-7299-01
LGG(N=403)	4	4.4463	TCGA-DB-5270-01
LGG(N=403)	0	4.2766	TCGA-KT-A74X-01
LGG(N=403)	2	4.433	TCGA-DB-A75L-01
LGG(N=403)	0	4.4357	TCGA-HT-A616-01
LGG(N=403)	9	3.7971	TCGA-HT-A74K-01
LGG(N=403)	21	4.178	TCGA-WY-A85C-01
LGG(N=403)	0	4.4595	TCGA-FG-8188-01
LGG(N=403)	4	4.7777	TCGA-DU-A6S7-01
LGG(N=403)	74	2.7139	TCGA-DB-5274-01
LGG(N=403)	2	4.7756	TCGA-HT-7604-01
LGG(N=403)	9	4.131	TCGA-TM-A84F-01
LGG(N=403)	4	4.2381	TCGA-DB-A64O-01
LGG(N=403)	18	4.4263	TCGA-HT-7884-01
LGG(N=403)	9	4.2943	TCGA-S9-A6WE-01
LGG(N=403)	6	4.6866	TCGA-S9-A6WM-01
LGG(N=403)	1	4.9607	TCGA-HT-A5RA-01
LGG(N=403)	0	4.5336	TCGA-DU-5852-01
LGG(N=403)	7	4.3834	TCGA-DB-A75K-01
LGG(N=403)	0	4.4397	TCGA-DU-6410-01
LGG(N=403)	15	4.2072	TCGA-QH-A65Z-01
LGG(N=403)	5	3.8729	TCGA-S9-A7IY-01
LGG(N=403)	3	4.0019	TCGA-P5-A781-01
LGG(N=403)	0	5.0536	TCGA-TM-A84G-01
LGG(N=403)	6	4.3667	TCGA-HW-A5KK-01
LGG(N=403)	0	4.9055	TCGA-FG-7634-01
LGG(N=403)	0	4.0653	TCGA-DU-5855-01
LGG(N=403)	7	4.7377	TCGA-DU-6396-01
LGG(N=403)	5	4.2743	TCGA-FG-7643-01
LGG(N=403)	79	4.5392	TCGA-TM-A84C-01
LGG(N=403)	3	4.1684	TCGA-WY-A85E-01
LGG(N=403)	26	4.6474	TCGA-DU-7298-01
LGG(N=403)	0	4.0575	TCGA-TM-A84T-01
LGG(N=403)	1	4.3082	TCGA-FG-7637-01
LGG(N=403)	8	4.2892	TCGA-HT-A5R9-01
LGG(N=403)	4	4.5142	TCGA-HT-A614-01
LGG(N=403)	1	4.1153	TCGA-QH-A65R-01
LGG(N=403)	4	4.9769	TCGA-HT-7882-01
LGG(N=403)	2	4.309	TCGA-HT-8011-01
LGG(N=403)	28	4.8125	TCGA-DU-6394-01
LGG(N=403)	0	4.5466	TCGA-WY-A859-01
LGG(N=403)	7	4.6101	TCGA-S9-A6UB-01
LGG(N=403)	0	4.3793	TCGA-S9-A6U6-01
LGG(N=403)	7	5.0317	TCGA-DU-8168-01
LGG(N=403)	0	4.6977	TCGA-DU-7290-01
LGG(N=403)	1	4.4958	TCGA-DU-6407-01
LGG(N=403)	5	4.8038	TCGA-HT-7601-01
LGG(N=403)	2	4.735	TCGA-DU-6403-01
LGG(N=403)	1	4.6938	TCGA-E1-A7YQ-01
LGG(N=403)	12	4.9402	TCGA-DU-6405-01
LGG(N=403)	5	4.6	TCGA-S9-A7J1-01
LGG(N=403)	0	4.2419	TCGA-P5-A72X-01
LGG(N=403)	1	4.7496	TCGA-E1-A7YJ-01
LGG(N=403)	1	4.783	TCGA-HT-7690-01
LGG(N=403)	27	4.4751	TCGA-HT-8105-01
LGG(N=403)	1	4.6236	TCGA-E1-A7YY-01
LGG(N=403)	2	4.3786	TCGA-DU-6400-01
LGG(N=403)	1	3.705	TCGA-P5-A737-01
LGG(N=403)	2	4.3349	TCGA-RY-A83Y-01
LGG(N=403)	130	4.906	TCGA-HT-8564-01
LGG(N=403)	7	4.5596	TCGA-HT-7686-01
LGG(N=403)	2	4.1571	TCGA-E1-A7YM-01
LGG(N=403)	0	4.001	TCGA-DH-A66F-01
LGG(N=403)	1	4.5053	TCGA-CS-5390-01
LGG(N=403)	0	5.0657	TCGA-S9-A6UA-01
LGG(N=403)	0	4.9113	TCGA-FG-A87N-01
LGG(N=403)	2	3.9838	TCGA-VV-A829-01
LGG(N=403)	14	4.4615	TCGA-DH-A66B-01
LGG(N=403)	0	4.306	TCGA-HT-A5R7-01
LGG(N=403)	4	4.677	TCGA-CS-5394-01
LGG(N=403)	9	4.7861	TCGA-DH-A66D-01
LGG(N=403)	6	4.3653	TCGA-HT-7877-01
LGG(N=403)	0	4.8435	TCGA-DU-6542-01
LGG(N=403)	9	4.3421	TCGA-QH-A6CS-01
LGG(N=403)	6	4.2899	TCGA-W9-A837-01
LGG(N=403)	0	4.5274	TCGA-IK-7675-01
LGG(N=403)	1	4.1384	TCGA-DU-7306-01
LGG(N=403)	0	4.5559	TCGA-QH-A6X9-01
LGG(N=403)	2	4.7209	TCGA-HT-7611-01
LGG(N=403)	1	4.1716	TCGA-DU-A7TB-01
LGG(N=403)	8	4.2526	TCGA-IK-8125-01
LGG(N=403)	6	3.6405	TCGA-WH-A86K-01
LGG(N=403)	2	3.7061	TCGA-FG-A60L-01
LGG(N=403)	0	4.859	TCGA-DB-5280-01
LGG(N=403)	4	4.373	TCGA-S9-A7IX-01
LGG(N=403)	4	4.6012	TCGA-FG-5965-01
LGG(N=403)	4	5.2107	TCGA-DU-7007-01
LGG(N=403)	7	3.9992	TCGA-HW-7490-01
LGG(N=403)	0	4.5675	TCGA-CS-6188-01
LGG(N=403)	2	4.8944	TCGA-CS-6668-01
LGG(N=403)	0	5.3615	TCGA-DU-8165-01
LGG(N=403)	4	3.3076	TCGA-HT-7692-01
LGG(N=403)	5	4.7077	TCGA-TQ-A7RM-01
LGG(N=403)	1	5.1231	TCGA-DU-8161-01
LGG(N=403)	6	3.9308	TCGA-P5-A736-01
LGG(N=403)	39	4.1547	TCGA-DU-6401-01
LGG(N=403)	3	3.8095	TCGA-HT-A74H-01
LGG(N=403)	2	4.5236	TCGA-TQ-A7RV-01
LGG(N=403)	0	3.9421	TCGA-HT-7620-01
LGG(N=403)	1	4.7735	TCGA-HT-7480-01
LGG(N=403)	10	4.9379	TCGA-S9-A7J0-01
LGG(N=403)	5	4.8987	TCGA-TM-A84Q-01
LGG(N=403)	0	3.9534	TCGA-RY-A847-01
LGG(N=403)	8	4.4377	TCGA-TQ-A7RQ-01
LGG(N=403)	0	4.8729	TCGA-TQ-A7RW-01
LGG(N=403)	4	4.5711	TCGA-E1-A7YW-01
LGG(N=403)	16	4.8817	TCGA-E1-A7YS-01
LGG(N=403)	1	4.4641	TCGA-DU-7012-01
LGG(N=403)	6	4.6977	TCGA-HT-7879-01
LGG(N=403)	9	3.9232	TCGA-DU-A7TC-01
LGG(N=403)	23	4.504	TCGA-DB-A4X9-01
LGG(N=403)	3	4.7154	TCGA-TQ-A7RI-01
LGG(N=403)	10	4.3177	TCGA-TM-A7CA-01
LGG(N=403)	4	4.5053	TCGA-QH-A86X-01
LGG(N=403)	0	4.3917	TCGA-DU-A76R-01
LGG(N=403)	0	4.5711	TCGA-E1-A7Z2-01
LGG(N=403)	1	3.8228	TCGA-FG-8187-01
LGG(N=403)	2	4.9002	TCGA-E1-5304-01
LGG(N=403)	16	4.7725	TCGA-DH-5140-01
LGG(N=403)	1	4.1252	TCGA-TM-A7CF-01
LGG(N=403)	0	4.3039	TCGA-HT-A61B-01
LGG(N=403)	0	4.2892	TCGA-E1-A7Z6-01
LGG(N=403)	7	4.8525	TCGA-HT-7857-01
LGG(N=403)	11	4.0985	TCGA-E1-5319-01
LGG(N=403)	0	3.4477	TCGA-DU-A5TS-01
LGG(N=403)	356	5.0709	TCGA-DU-6392-01
LGG(N=403)	5	3.4477	TCGA-QH-A6CU-01
LGG(N=403)	1	3.47	TCGA-VW-A8FI-01
LGG(N=403)	2	3.492	TCGA-P5-A5EZ-01
LGG(N=403)	3	4.0636	TCGA-S9-A89Z-01
LGG(N=403)	8	4.6921	TCGA-S9-A6TZ-01
LGG(N=403)	1	4.6177	TCGA-FG-5963-01
LGG(N=403)	12	4.6195	TCGA-S9-A89V-01
LGG(N=403)	6	4.5832	TCGA-DB-A64W-01
LGG(N=403)	0	2.8681	TCGA-FG-A4MX-01
LGG(N=403)	1	4.9915	TCGA-P5-A72Z-01
LGG(N=403)	1	4.8699	TCGA-HT-8114-01
LGG(N=403)	0	4.3855	TCGA-HT-7881-01
LGG(N=403)	0	3.4183	TCGA-CS-4944-01
LGG(N=403)	1	3.9654	TCGA-S9-A7QX-01
LGG(N=403)	1	4.0549	TCGA-DU-A7TG-01
LGG(N=403)	0	4.7022	TCGA-DU-5874-01
LGG(N=403)	0	4.5047	TCGA-TQ-A8XE-01
LGG(N=403)	19	4.3299	TCGA-DU-7300-01
LGG(N=403)	14	4.3896	TCGA-HT-7694-01
LGG(N=403)	0	4.926	TCGA-HT-7471-01
LGG(N=403)	16	4.6077	TCGA-DB-A4XD-01
LGG(N=403)	3	4.4074	TCGA-TQ-A7RK-01
LGG(N=403)	31	4.1523	TCGA-HT-7475-01
LGG(N=403)	31	4.6247	TCGA-HT-7902-01
LGG(N=403)	7	4.3463	TCGA-FG-A711-01
LGG(N=403)	15	4.5091	TCGA-DB-5276-01
LGG(N=403)	0	4.8213	TCGA-E1-A7YD-01
LGG(N=403)	9	3.9874	TCGA-HT-A74O-01
LGG(N=403)	21	4.2427	TCGA-DH-A669-01
LGG(N=403)	0	4.1636	TCGA-HT-7605-01
LGG(N=403)	1	4.5946	TCGA-S9-A6WO-01
LGG(N=403)	2	3.867	TCGA-QH-A6CX-01
LGG(N=403)	0	4.2624	TCGA-P5-A5F4-01
LGG(N=403)	4	4.2266	TCGA-DU-A76K-01
LGG(N=403)	0	4.3744	TCGA-VM-A8CH-01
LGG(N=403)	4	4.4047	TCGA-QH-A6X4-01
LGG(N=403)	38	4.2676	TCGA-DH-A7UV-01
LGG(N=403)	0	3.8729	TCGA-TM-A7C3-01
LGG(N=403)	10	3.9337	TCGA-DU-8167-01
LGG(N=403)	16	4.222	TCGA-QH-A65X-01
LGG(N=403)	1	4.641	TCGA-E1-5302-01
LGG(N=403)	25	2.9618	TCGA-HW-A5KJ-01
LGG(N=403)	6	4.1466	TCGA-FG-7636-01
LGG(N=403)	0	4.2862	TCGA-DU-5847-01
LGG(N=403)	0	4.9524	TCGA-TM-A84B-01
LGG(N=403)	1	4.4861	TCGA-DU-A76O-01
CESC(N=244)	0	4.4628	TCGA-EK-A2RE-01
CESC(N=244)	4	5.8795	TCGA-IR-A3L7-01
CESC(N=244)	3	4.5748	TCGA-Q1-A73Q-01
CESC(N=244)	0	2.3704	TCGA-C5-A1MF-01
CESC(N=244)	4	5.4013	TCGA-EX-A3L1-01
CESC(N=244)	22	5.4165	TCGA-JW-A5VI-01
CESC(N=244)	1	4.8012	TCGA-EA-A1QT-01
CESC(N=244)	0	4.5723	TCGA-UC-A7PG-01
CESC(N=244)	0	6.3216	TCGA-EA-A97N-01
CESC(N=244)	4	3.7017	TCGA-C5-A1ME-01
CESC(N=244)	15	5.4722	TCGA-C5-A8YR-01
CESC(N=244)	12	4.5161	TCGA-FU-A40J-01
CESC(N=244)	5	4.8228	TCGA-VS-A9V5-01
CESC(N=244)	6	5.433	TCGA-MY-A913-01
CESC(N=244)	4	5.602	TCGA-VS-A8Q9-01
CESC(N=244)	2	4.2877	TCGA-VS-A9UU-01
CESC(N=244)	1	5.0858	TCGA-ZJ-AAXN-01
CESC(N=244)	88	5.235	TCGA-VS-A9U6-01
CESC(N=244)	2	3.8075	TCGA-C5-A2LX-01
CESC(N=244)	0	4.8022	TCGA-C5-A7CJ-01
CESC(N=244)	0	5.5053	TCGA-GH-A9DA-01
CESC(N=244)	1	3.5875	TCGA-EA-A5O9-01
CESC(N=244)	1	4.9951	TCGA-Q1-A73P-01
CESC(N=244)	1	4.9621	TCGA-C5-A8XK-01
CESC(N=244)	1	5.1161	TCGA-C5-A907-01
CESC(N=244)	6	3.7475	TCGA-VS-A9UD-01
CESC(N=244)	1	4.9007	TCGA-VS-A9V2-01
CESC(N=244)	0	4.9561	TCGA-VS-A94Y-01
CESC(N=244)	0	5.0816	TCGA-C5-A8ZZ-01
CESC(N=244)	240	6.0736	TCGA-VS-A9UJ-01
CESC(N=244)	4	4.9402	TCGA-Q1-A6DT-01
CESC(N=244)	14	5.6789	TCGA-VS-A9UQ-01
CESC(N=244)	4	4.5934	TCGA-VS-A8EG-01
CESC(N=244)	13	5.4845	TCGA-Q1-A73O-01
CESC(N=244)	8	4.3702	TCGA-VS-A8QC-01
CESC(N=244)	2	4.9199	TCGA-EA-A5ZE-01
CESC(N=244)	19	4.579	TCGA-ZJ-A8QO-01
CESC(N=244)	3	4.1764	TCGA-EK-A2GZ-01
CESC(N=244)	1	4.0287	TCGA-EK-A2R9-01
CESC(N=244)	0	4.248	TCGA-C5-A1M5-01
CESC(N=244)	3	4.2404	TCGA-C5-A7X8-01
CESC(N=244)	76	5.1132	TCGA-EA-A3HS-01
CESC(N=244)	13	4.7033	TCGA-IR-A3LH-01
CESC(N=244)	1	5.0631	TCGA-C5-A1M9-01
CESC(N=244)	2	1.2147	TCGA-DG-A2KJ-01
CESC(N=244)	3	3.5187	TCGA-Q1-A5R3-01
CESC(N=244)	3	4.7919	TCGA-HG-A2PA-01
CESC(N=244)	24	4.9079	TCGA-VS-A9V3-01
CESC(N=244)	2	4.843	TCGA-VS-A9UH-01
CESC(N=244)	2	5.193	TCGA-VS-A8QA-01
CESC(N=244)	0	5.3313	TCGA-FU-A5XV-01
CESC(N=244)	5	3.7846	TCGA-EX-A8YF-01
CESC(N=244)	7	5.4793	TCGA-ZJ-A8QR-01
CESC(N=244)	1	3.7783	TCGA-IR-A3LB-01
CESC(N=244)	0	4.4784	TCGA-HM-A6W2-01
CESC(N=244)	12	4.6832	TCGA-IR-A3LF-01
CESC(N=244)	3	4.734	TCGA-VS-A8QF-01
CESC(N=244)	11	3.5596	TCGA-C5-A7UE-01
CESC(N=244)	0	4.2442	TCGA-DS-A5RQ-01
CESC(N=244)	1	4.2227	TCGA-BI-A20A-01
CESC(N=244)	136	4.1019	TCGA-EA-A3HU-01
CESC(N=244)	6	5.5814	TCGA-EK-A2RM-01
CESC(N=244)	8	5.281	TCGA-DG-A2KK-01
CESC(N=244)	0	5.9284	TCGA-C5-A1MI-01
CESC(N=244)	0	2.9507	TCGA-JW-A852-01
CESC(N=244)	7	4.2526	TCGA-EK-A2RA-01
CESC(N=244)	5	4.1335	TCGA-EK-A2RB-01
CESC(N=244)	3	4.6972	TCGA-C5-A1MJ-01
CESC(N=244)	8	4.6247	TCGA-C5-A1BE-01
CESC(N=244)	7	3.3492	TCGA-LP-A7HU-01
CESC(N=244)	269	4.7929	TCGA-2W-A8YY-01
CESC(N=244)	0	5.6144	TCGA-EA-A411-01
CESC(N=244)	1	5.7963	TCGA-C5-A1MN-01
CESC(N=244)	6	5.2335	TCGA-C5-A2M2-01
CESC(N=244)	11	4.2056	TCGA-EK-A2PK-01
CESC(N=244)	682	3.981	TCGA-EA-A410-01
CESC(N=244)	4	5.4236	TCGA-VS-A952-01
CESC(N=244)	1	3.8591	TCGA-EK-A2IP-01
CESC(N=244)	1	4.0969	TCGA-EK-A2PG-01
CESC(N=244)	4	4.3786	TCGA-FU-A3YQ-01
CESC(N=244)	18	3.3979	TCGA-DS-A1OB-01
CESC(N=244)	2	4.9556	TCGA-VS-A959-01
CESC(N=244)	2	4.5485	TCGA-EK-A2R7-01
CESC(N=244)	23	4.7033	TCGA-C5-A7UH-01
CESC(N=244)	19	5.1942	TCGA-MA-AA3Z-01
CESC(N=244)	0	4.3876	TCGA-VS-A9UR-01
CESC(N=244)	0	4.5374	TCGA-EK-A3GN-01
CESC(N=244)	10	2.5011	TCGA-DS-A3LQ-01
CESC(N=244)	2	4.9454	TCGA-ZJ-AAXU-01
CESC(N=244)	5	4.4887	TCGA-VS-A9UY-01
CESC(N=244)	0	5.7263	TCGA-ZJ-AAXA-01
CESC(N=244)	0	4.3068	TCGA-EK-A2RO-01
CESC(N=244)	3	5.0045	TCGA-DS-A0VM-01
CESC(N=244)	1	5.1098	TCGA-EX-A1H5-01
CESC(N=244)	7	3.0944	TCGA-FU-A3EO-01
CESC(N=244)	6	3.6474	TCGA-EK-A2RK-01
CESC(N=244)	13	4.5898	TCGA-C5-A1BL-01
CESC(N=244)	0	4.2921	TCGA-Q1-A73S-01
CESC(N=244)	1	5.2754	TCGA-PN-A8MA-01
CESC(N=244)	0	3.9204	TCGA-DS-A7WF-01
CESC(N=244)	3	4.9824	TCGA-C5-A7X3-01
CESC(N=244)	1	4.4732	TCGA-HM-A3JK-01
CESC(N=244)	50	3.1572	TCGA-ZJ-AAXJ-01
CESC(N=244)	4	5.014	TCGA-VS-A9V1-01
CESC(N=244)	16	4.2204	TCGA-FU-A3HZ-01
CESC(N=244)	0	3.7367	TCGA-EA-A78R-01
CESC(N=244)	0	5.22	TCGA-JW-A5VG-01
CESC(N=244)	6	4.5826	TCGA-VS-A9UV-01
CESC(N=244)	4	5.1065	TCGA-ZX-AA5X-01
CESC(N=244)	0	4.0497	TCGA-VS-A958-01
CESC(N=244)	4	4.3456	TCGA-VS-A8EL-01
CESC(N=244)	2	4.6035	TCGA-ZJ-AB0I-01
CESC(N=244)	0	5.2114	TCGA-VS-A950-01
CESC(N=244)	16	5.6879	TCGA-DS-A1OC-01
CESC(N=244)	0	4.5454	TCGA-MA-AA3W-01
CESC(N=244)	2	4.7372	TCGA-VS-A9UL-01
CESC(N=244)	0	3.7762	TCGA-VS-A9UO-01
CESC(N=244)	7	5.4867	TCGA-C5-A8XJ-01
CESC(N=244)	0	4.5723	TCGA-C5-A7CL-01
CESC(N=244)	7	5.195	TCGA-FU-A3NI-01
CESC(N=244)	4	4.8405	TCGA-VS-A9V0-01
CESC(N=244)	2	5.0023	TCGA-EK-A3GK-01
CESC(N=244)	7	4.4364	TCGA-C5-A7CG-01
CESC(N=244)	0	4.3917	TCGA-C5-A1BI-01
CESC(N=244)	3	5.7522	TCGA-HM-A3JJ-01
CESC(N=244)	7	3.0376	TCGA-C5-A7UI-01
CESC(N=244)	0	5.7326	TCGA-ZJ-AAXD-01
CESC(N=244)	0	4.347	TCGA-EK-A2R8-01
CESC(N=244)	7	5.3681	TCGA-VS-A9UP-01
CESC(N=244)	3	4.402	TCGA-C5-A1BF-01
CESC(N=244)	2	3.6382	TCGA-EX-A69M-01
CESC(N=244)	2	4.7214	TCGA-BI-A0VS-01
CESC(N=244)	11	3.9487	TCGA-VS-A8EJ-01
CESC(N=244)	14	5.3975	TCGA-DR-A0ZL-01
CESC(N=244)	2	4.4951	TCGA-MA-AA41-01
CESC(N=244)	2	5.5311	TCGA-EA-A3HQ-01
CESC(N=244)	7	4.9069	TCGA-EA-A43B-01
CESC(N=244)	0	3.6759	TCGA-IR-A3LI-01
CESC(N=244)	0	3.6748	TCGA-EA-A3Y4-01
CESC(N=244)	8	4.3328	TCGA-UC-A7PF-01
CESC(N=244)	9	5.2258	TCGA-VS-A9UB-01
CESC(N=244)	0	5.0313	TCGA-UC-A7PI-01
CESC(N=244)	1	4.8141	TCGA-DG-A2KL-01
CESC(N=244)	2	4.8279	TCGA-JW-AAVH-01
CESC(N=244)	0	5.0117	TCGA-Q1-A5R1-01
CESC(N=244)	1	4.986	TCGA-EK-A2PL-01
CESC(N=244)	0	4.5522	TCGA-Q1-A6DW-01
CESC(N=244)	1	4.3951	TCGA-C5-A2M1-01
CESC(N=244)	4	6.191	TCGA-EA-A5ZF-01
CESC(N=244)	4	5.8125	TCGA-FU-A23L-01
CESC(N=244)	2	4.2795	TCGA-LP-A4AU-01
CESC(N=244)	3	4.1417	TCGA-VS-A9U7-01
CESC(N=244)	7	4.3306	TCGA-C5-A2LS-01
CESC(N=244)	0	4.8202	TCGA-MA-AA3Y-01
CESC(N=244)	0	4.8699	TCGA-C5-A3HF-01
CESC(N=244)	5	3.7741	TCGA-C5-A1BK-01
CESC(N=244)	0	5.0184	TCGA-VS-A9UZ-01
CESC(N=244)	5	4.944	TCGA-DS-A1OD-01
CESC(N=244)	3	4.4881	TCGA-C5-A8XH-01
CESC(N=244)	3	4.8028	TCGA-EK-A2RC-01
CESC(N=244)	10	4.1343	TCGA-JX-A3Q8-01
CESC(N=244)	0	4.2884	TCGA-DS-A7WI-01
CESC(N=244)	1	3.3966	TCGA-VS-A953-01
CESC(N=244)	3	4.9364	TCGA-VS-A957-01
CESC(N=244)	6	4.5473	TCGA-JW-A5VH-01
CESC(N=244)	0	4.4615	TCGA-EA-A3HR-01
CESC(N=244)	1	4.7038	TCGA-EA-A3QE-01
CESC(N=244)	4	5.0365	TCGA-WL-A834-01
CESC(N=244)	0	4.4257	TCGA-JW-A69B-01
CESC(N=244)	3	5.4549	TCGA-FU-A3HY-01
CESC(N=244)	2	5.2694	TCGA-C5-A1M6-01
CESC(N=244)	7	3.8431	TCGA-VS-A9V4-01
CESC(N=244)	0	3.29	TCGA-VS-A8Q8-01
CESC(N=244)	7	4.1002	TCGA-DS-A0VN-01
CESC(N=244)	1	4.0091	TCGA-MU-A8JM-01
CESC(N=244)	4	5.5088	TCGA-EA-A6QX-01
CESC(N=244)	1	4.9113	TCGA-C5-A7CH-01
CESC(N=244)	5	3.4687	TCGA-EK-A2RN-01
CESC(N=244)	2	3.8571	TCGA-EK-A2RJ-01
CESC(N=244)	7	4.2165	TCGA-C5-A1BM-01
CESC(N=244)	0	4.4771	TCGA-Q1-A73R-01
CESC(N=244)	0	4.9002	TCGA-DS-A7WH-01
CESC(N=244)	3	4.9045	TCGA-C5-A7CK-01
CESC(N=244)	19	5.6713	TCGA-VS-A8EK-01
CESC(N=244)	0	4.5386	TCGA-FU-A3WB-01
CESC(N=244)	2	4.9346	TCGA-FU-A3TQ-01
CESC(N=244)	0	4.6877	TCGA-C5-A8XI-01
CESC(N=244)	1	4.8319	TCGA-C5-A1BN-01
CESC(N=244)	1	4.0696	TCGA-IR-A3LA-01
CESC(N=244)	1	4.6742	TCGA-VS-A94X-01
CESC(N=244)	127	4.6381	TCGA-MA-AA42-01
CESC(N=244)	26	5.1186	TCGA-C5-A8YQ-01
CESC(N=244)	14	4.6944	TCGA-ZJ-AB0H-01
CESC(N=244)	0	4.3191	TCGA-C5-A7X5-01
CESC(N=244)	2	5.126	TCGA-VS-A9U5-01
CESC(N=244)	6	4.6445	TCGA-C5-A1M7-01
CESC(N=244)	1	4.734	TCGA-C5-A905-01
CESC(N=244)	4	3.5047	TCGA-Q1-A5R2-01
CESC(N=244)	1	4.1044	TCGA-EK-A3GJ-01
CESC(N=244)	33	5.1429	TCGA-VS-A8EB-01
CESC(N=244)	1	4.7645	TCGA-LP-A4AX-01
CESC(N=244)	391	5.4496	TCGA-VS-A94Z-01
CESC(N=244)	36	3.2405	TCGA-ZJ-AAXB-01
CESC(N=244)	1	3.8461	TCGA-C5-A1MQ-01
CESC(N=244)	3	3.2158	TCGA-EX-A1H6-01
CESC(N=244)	0	4.8846	TCGA-ZJ-AAXF-01
CESC(N=244)	6	5.2068	TCGA-VS-A9UM-01
CESC(N=244)	3	4.3421	TCGA-BI-A0VR-01
CESC(N=244)	2	4.7688	TCGA-EA-A5FO-01
CESC(N=244)	5	2.9948	TCGA-DR-A0ZM-01
CESC(N=244)	2	4.281	TCGA-MA-AA43-01
CESC(N=244)	11	5.9286	TCGA-C5-A7UC-01
CESC(N=244)	0	4.9924	TCGA-VS-A8QH-01
CESC(N=244)	0	4.7307	TCGA-EA-A3HT-01
CESC(N=244)	3	4.2196	TCGA-IR-A3LC-01
CESC(N=244)	1	4.9924	TCGA-FU-A770-01
CESC(N=244)	10	4.1128	TCGA-VS-A8EC-01
CESC(N=244)	0	5.5069	TCGA-4J-AA1J-01
CESC(N=244)	2	2.1925	TCGA-LP-A4AV-01
CESC(N=244)	0	4.863	TCGA-EK-A2RL-01
CESC(N=244)	28	4.1392	TCGA-EK-A3GM-01
CESC(N=244)	0	4.0436	TCGA-VS-A9UC-01
CESC(N=244)	0	4.4283	TCGA-FU-A2QG-01
CESC(N=244)	2	3.6872	TCGA-EK-A2PM-01
CESC(N=244)	2	5.824	TCGA-DS-A0VK-01
CESC(N=244)	1	4.2773	TCGA-C5-A1MK-01
CESC(N=244)	0	4.8861	TCGA-C5-A1MH-01
CESC(N=244)	1	4.8319	TCGA-VS-A9UI-01
CESC(N=244)	0	3.7518	TCGA-FU-A3TX-01
CESC(N=244)	4	4.9218	TCGA-Q1-A6DV-01
CESC(N=244)	0	4.1587	TCGA-C5-A1ML-01
CESC(N=244)	0	5.0777	TCGA-VS-A8QM-01
CESC(N=244)	2	5.2616	TCGA-RA-A741-01
CESC(N=244)	8	3.7846	TCGA-VS-A954-01
CESC(N=244)	0	5.2687	TCGA-XS-A8TJ-01
CESC(N=244)	5	4.8028	TCGA-LP-A4AW-01
CESC(N=244)	5	3.4958	TCGA-JW-A5VK-01
CESC(N=244)	4	4.174	TCGA-C5-A902-01
CESC(N=244)	10	5.0558	TCGA-MA-AA3X-01
CESC(N=244)	0	4.2646	TCGA-C5-A7CO-01
CESC(N=244)	2	4.1604	TCGA-C5-A2LV-01
CESC(N=244)	2	4.8064	TCGA-VS-A9UT-01
CESC(N=244)	4	5.1392	TCGA-ZJ-AAX8-01
CESC(N=244)	0	5.079	TCGA-C5-A1BJ-01
LUAD(N=462)	21	5.0374	TCGA-44-6778-01
LUAD(N=462)	6	3.9002	TCGA-05-4420-01
LUAD(N=462)	21	5.6823	TCGA-64-1679-01
LUAD(N=462)	1	4.4751	TCGA-49-6744-01
LUAD(N=462)	20	5.8112	TCGA-55-6982-01
LUAD(N=462)	34	5.2832	TCGA-NJ-A4YI-01
LUAD(N=462)	38	5.2396	TCGA-73-4666-01
LUAD(N=462)	61	5.1098	TCGA-MN-A4N1-01
LUAD(N=462)	5	4.7746	TCGA-55-7911-01
LUAD(N=462)	122	5.7068	TCGA-55-A4DG-01
LUAD(N=462)	29	4.7474	TCGA-L9-A5IP-01
LUAD(N=462)	4	5.1473	TCGA-73-4662-01
LUAD(N=462)	16	5.096	TCGA-55-6712-01
LUAD(N=462)	11	5.4916	TCGA-97-7553-01
LUAD(N=462)	141	5.6848	TCGA-49-AARE-01
LUAD(N=462)	4	4.7528	TCGA-50-8460-01
LUAD(N=462)	22	5.3431	TCGA-50-5933-01
LUAD(N=462)	7	4.8714	TCGA-44-6774-01
LUAD(N=462)	41	4.3834	TCGA-73-4670-01
LUAD(N=462)	2	4.0909	TCGA-55-A48Z-01
LUAD(N=462)	35	4.0383	TCGA-75-7031-01
LUAD(N=462)	6	5.2126	TCGA-44-A47A-01
LUAD(N=462)	79	4.5224	TCGA-05-4398-01
LUAD(N=462)	9	4.5528	TCGA-67-3773-01
LUAD(N=462)	55	4.2281	TCGA-64-5781-01
LUAD(N=462)	2	5.9858	TCGA-97-7552-01
LUAD(N=462)	27	5.1571	TCGA-49-AARN-01
LUAD(N=462)	4	4.7356	TCGA-44-3919-01
LUAD(N=462)	40	3.8621	TCGA-99-8032-01
LUAD(N=462)	20	4.5355	TCGA-55-A491-01
LUAD(N=462)	1	5.0126	TCGA-50-6595-01
LUAD(N=462)	7	4.2041	TCGA-95-A4VP-01
LUAD(N=462)	13	5.5192	TCGA-55-8302-01
LUAD(N=462)	66	3.24602	TCGA-44-4112-01
LUAD(N=462)	10	4.838	TCGA-05-4430-01
LUAD(N=462)	14	5.2994	TCGA-75-7027-01
LUAD(N=462)	11	4.63775	TCGA-44-2668-01
LUAD(N=462)	40	4.7377	TCGA-55-8507-01
LUAD(N=462)	1	5.9432	TCGA-69-8254-01
LUAD(N=462)	19	5.9565	TCGA-78-8640-01
LUAD(N=462)	23	5.1065	TCGA-69-7979-01
LUAD(N=462)	10	6.0989	TCGA-55-7573-01
LUAD(N=462)	6	3.3717	TCGA-49-4506-01
LUAD(N=462)	29	4.8345	TCGA-05-4402-01
LUAD(N=462)	51	4.499	TCGA-44-8119-01
LUAD(N=462)	1	4.865	TCGA-55-7724-01
LUAD(N=462)	25	6.0858	TCGA-44-6776-01
LUAD(N=462)	22	3.741	TCGA-49-4514-01
LUAD(N=462)	58	5.5429	TCGA-05-4396-01
LUAD(N=462)	1	5.3388	TCGA-55-8204-01
LUAD(N=462)	1	5.22	TCGA-75-6205-01
LUAD(N=462)	104	4.4739	TCGA-62-A46O-01
LUAD(N=462)	52	5.0803	TCGA-78-7155-01
LUAD(N=462)	9	4.9002	TCGA-62-A472-01
LUAD(N=462)	3	4.9955	TCGA-NJ-A55R-01
LUAD(N=462)	16	5.4077	TCGA-62-8395-01
LUAD(N=462)	60	4.3709	TCGA-95-7567-01
LUAD(N=462)	4	4.2025	TCGA-50-5051-01
LUAD(N=462)	7	4.7242	TCGA-55-A48Y-01
LUAD(N=462)	22	5.7581	TCGA-86-A456-01
LUAD(N=462)	4	2.8622	TCGA-50-5068-01
LUAD(N=462)	5	5.4253	TCGA-NJ-A55A-01
LUAD(N=462)	16	5.4624	TCGA-J2-A4AG-01
LUAD(N=462)	34	4.9672	TCGA-05-4405-01
LUAD(N=462)	11	4.7762	TCGA-86-7955-01
LUAD(N=462)	9	5.8468	TCGA-50-6673-01
LUAD(N=462)	9	5.2072	TCGA-55-7727-01
LUAD(N=462)	1	5.1887	TCGA-55-8510-01
LUAD(N=462)	6	4.0118	TCGA-MP-A4T8-01
LUAD(N=462)	18	6.1871	TCGA-86-8279-01
LUAD(N=462)	13	5.3067	TCGA-55-A494-01
LUAD(N=462)	12	4.728	TCGA-75-5125-01
LUAD(N=462)	3	4.1587	TCGA-55-8615-01
LUAD(N=462)	7	5.658	TCGA-MP-A4TF-01
LUAD(N=462)	10	4.1294	TCGA-55-6979-01
LUAD(N=462)	301	3.8778	TCGA-86-A4JF-01
LUAD(N=462)	15	4.4067	TCGA-86-7701-01
LUAD(N=462)	5	5.5747	TCGA-62-8398-01
LUAD(N=462)	14	3.8944	TCGA-L9-A443-01
LUAD(N=462)	10	4.9691	TCGA-78-8660-01
LUAD(N=462)	30	5.2799	TCGA-78-7148-01
LUAD(N=462)	2	4.4088	TCGA-67-6215-01
LUAD(N=462)	99	4.8963	TCGA-55-A490-01
LUAD(N=462)	26	4.936	TCGA-69-7974-01
LUAD(N=462)	73	4.7367	TCGA-49-AAR4-01
LUAD(N=462)	13	3.8561	TCGA-05-4418-01
LUAD(N=462)	12	3.6054	TCGA-35-4123-01
LUAD(N=462)	57	3.7825	TCGA-55-6969-01
LUAD(N=462)	2	5.1835	TCGA-91-8497-01
LUAD(N=462)	19	4.4751	TCGA-62-A470-01
LUAD(N=462)	13	4.8817	TCGA-53-A4EZ-01
LUAD(N=462)	4	5.3639	TCGA-78-7162-01
LUAD(N=462)	36	4.7919	TCGA-62-A46Y-01
LUAD(N=462)	14	5.8585	TCGA-62-A46R-01
LUAD(N=462)	54	4.691	TCGA-L9-A8F4-01
LUAD(N=462)	3	5.3165	TCGA-55-7726-01
LUAD(N=462)	8	5.0989	TCGA-49-4512-01
LUAD(N=462)	67	5.0246	TCGA-73-A9RS-01
LUAD(N=462)	2	4.5217	TCGA-MP-A4TD-01
LUAD(N=462)	3	4.533	TCGA-75-5147-01
LUAD(N=462)	46	5.6445	TCGA-44-7671-01
LUAD(N=462)	94	3.8411	TCGA-38-4631-01
LUAD(N=462)	3	5.1152	TCGA-NJ-A55O-01
LUAD(N=462)	16	4.4913	TCGA-75-6211-01
LUAD(N=462)	6	4.5577	TCGA-55-1594-01
LUAD(N=462)	5	4.0207	TCGA-64-5774-01
LUAD(N=462)	10	4.916	TCGA-50-5941-01
LUAD(N=462)	5	5.15965	TCGA-44-2662-01
LUAD(N=462)	18	5.3245	TCGA-55-7995-01
LUAD(N=462)	324	4.7242	TCGA-95-7043-01
LUAD(N=462)	17	4.7762	TCGA-NJ-A4YP-01
LUAD(N=462)	8	4.7682	TCGA-78-7149-01
LUAD(N=462)	9	5.018	TCGA-MP-A4TC-01
LUAD(N=462)	1	5.6139	TCGA-97-A4M5-01
LUAD(N=462)	2	3.8105	TCGA-99-8028-01
LUAD(N=462)	6	6.1297	TCGA-67-6217-01
LUAD(N=462)	2	5.3104	TCGA-44-A47B-01
LUAD(N=462)	78	4.2951	TCGA-38-4628-01
LUAD(N=462)	20	5.0968	TCGA-05-4250-01
LUAD(N=462)	0	5.4463	TCGA-67-3774-01
LUAD(N=462)	9	4.5154	TCGA-80-5608-01
LUAD(N=462)	30	4.4887	TCGA-05-4389-01
LUAD(N=462)	0	5.4549	TCGA-75-6203-01
LUAD(N=462)	6	5.7926	TCGA-55-6981-01
LUAD(N=462)	24	4.6988	TCGA-55-7903-01
LUAD(N=462)	3	4.8748	TCGA-62-8394-01
LUAD(N=462)	12	5.3893	TCGA-49-4488-01
LUAD(N=462)	58	5.2533	TCGA-78-7537-01
LUAD(N=462)	13	6.5475	TCGA-80-5611-01
LUAD(N=462)	13	4.8395	TCGA-55-6972-01
LUAD(N=462)	5	6.1544	TCGA-97-7941-01
LUAD(N=462)	1	5.8687	TCGA-91-6840-01
LUAD(N=462)	55	5.0379	TCGA-69-7978-01
LUAD(N=462)	48	4.6543	TCGA-50-5930-01
LUAD(N=462)	9	4.2958	TCGA-93-8067-01
LUAD(N=462)	43	4.4673	TCGA-44-A479-01
LUAD(N=462)	1	6.0372	TCGA-55-8087-01
LUAD(N=462)	24	5.6247	TCGA-MP-A4SW-01
LUAD(N=462)	2	6.0424	TCGA-55-8512-01
LUAD(N=462)	1	6.9197	TCGA-50-6592-01
LUAD(N=462)	4	4.8978	TCGA-55-6975-01
LUAD(N=462)	12	5.5877	TCGA-S2-AA1A-01
LUAD(N=462)	40	5.3367	TCGA-55-8511-01
LUAD(N=462)	5	5.6227	TCGA-05-4434-01
LUAD(N=462)	23	4.7033	TCGA-55-8092-01
LUAD(N=462)	26	4.9303	TCGA-44-7661-01
LUAD(N=462)	3	5.4545	TCGA-05-4426-01
LUAD(N=462)	51	4.5085	TCGA-05-4390-01
LUAD(N=462)	5	4.8017	TCGA-64-5815-01
LUAD(N=462)	2	5.8689	TCGA-69-7761-01
LUAD(N=462)	17	4.3807	TCGA-55-8301-01
LUAD(N=462)	3	5.6496	TCGA-44-A4SU-01
LUAD(N=462)	18	5.0352	TCGA-69-7765-01
LUAD(N=462)	0	7.1384	TCGA-05-4433-01
LUAD(N=462)	101	4.0515	TCGA-55-8508-01
LUAD(N=462)	2	4.0488	TCGA-50-5044-01
LUAD(N=462)	4	5.6005	TCGA-05-4384-01
LUAD(N=462)	15	6.0618	TCGA-O1-A52J-01
LUAD(N=462)	21	5.7722	TCGA-78-7220-01
LUAD(N=462)	9	4.5047	TCGA-05-4422-01
LUAD(N=462)	6	6.2459	TCGA-44-6779-01
LUAD(N=462)	11	4.0462	TCGA-86-8672-01
LUAD(N=462)	19	4.5123	TCGA-55-6983-01
LUAD(N=462)	13	2.7051	TCGA-91-8499-01
LUAD(N=462)	14	5.0251	TCGA-91-6836-01
LUAD(N=462)	0	4.6347	TCGA-NJ-A4YG-01
LUAD(N=462)	14	4.4868	TCGA-73-4658-01
LUAD(N=462)	9	4.0251	TCGA-55-6987-01
LUAD(N=462)	1	4.4861	TCGA-78-7152-01
LUAD(N=462)	0	5.0566	TCGA-55-8096-01
LUAD(N=462)	35	4.9031	TCGA-75-5122-01
LUAD(N=462)	13	4.7192	TCGA-50-5931-01
LUAD(N=462)	32	4.9519	TCGA-49-AARO-01
LUAD(N=462)	7	5.4323	TCGA-44-2655-01
LUAD(N=462)	23	5.527	TCGA-73-4668-01
LUAD(N=462)	42	4.4243	TCGA-91-6831-01
LUAD(N=462)	26	4.6583	TCGA-L9-A444-01
LUAD(N=462)	4	4.8022	TCGA-05-5425-01
LUAD(N=462)	11	5.07486	TCGA-44-6775-01
LUAD(N=462)	0	5.5982	TCGA-75-7025-01
LUAD(N=462)	4	5.3527	TCGA-05-5429-01
LUAD(N=462)	71	5.2491	TCGA-99-7458-01
LUAD(N=462)	7	4.748	TCGA-97-7546-01
LUAD(N=462)	10	4.4357	TCGA-67-3772-01
LUAD(N=462)	1	4.4277	TCGA-05-4395-01
LUAD(N=462)	13	4.6938	TCGA-91-7771-01
LUAD(N=462)	8	5.9887	TCGA-55-6984-01
LUAD(N=462)	80	3.25565	TCGA-44-3918-01
LUAD(N=462)	2	5.2315	TCGA-50-8459-01
LUAD(N=462)	72	5.6645	TCGA-69-7980-01
LUAD(N=462)	4	5.5766	TCGA-50-5939-01
LUAD(N=462)	60	5.3227	TCGA-75-5126-01
LUAD(N=462)	75	4.7442	TCGA-50-6594-01
LUAD(N=462)	2	5.9074	TCGA-MP-A5C7-01
LUAD(N=462)	0	4.45508	TCGA-44-5645-01
LUAD(N=462)	5	5.3768	TCGA-50-5935-01
LUAD(N=462)	23	5.9832	TCGA-55-7914-01
LUAD(N=462)	6	4.5748	TCGA-55-7576-01
LUAD(N=462)	25	5.405	TCGA-73-4676-01
LUAD(N=462)	10	4.0419	TCGA-78-7166-01
LUAD(N=462)	11	5.813	TCGA-83-5908-01
LUAD(N=462)	102	4.1161	TCGA-50-5049-01
LUAD(N=462)	16	4.6428	TCGA-44-3396-01
LUAD(N=462)	18	5.9124	TCGA-97-8172-01
LUAD(N=462)	86	3.7867	TCGA-69-8255-01
LUAD(N=462)	0	5.2939	TCGA-62-A46U-01
LUAD(N=462)	3	4.9561	TCGA-97-8176-01
LUAD(N=462)	71	4.6725	TCGA-86-8358-01
LUAD(N=462)	4	5.2646	TCGA-05-4415-01
LUAD(N=462)	42	4.6787	TCGA-55-7281-01
LUAD(N=462)	5	4.3285	TCGA-78-7161-01
LUAD(N=462)	5	3.3563	TCGA-49-4507-01
LUAD(N=462)	13	5.2211	TCGA-55-8621-01
LUAD(N=462)	12	4.8059	TCGA-55-6970-01
LUAD(N=462)	12	5.5233	TCGA-75-6207-01
LUAD(N=462)	219	5.3299	TCGA-55-8205-01
LUAD(N=462)	1	5.3252	TCGA-69-7763-01
LUAD(N=462)	18	4.7491	TCGA-55-7913-01
LUAD(N=462)	2	4.7608	TCGA-62-8397-01
LUAD(N=462)	12	4.9218	TCGA-73-4659-01
LUAD(N=462)	25	3.8441	TCGA-91-A4BC-01
LUAD(N=462)	1	5.2895	TCGA-97-8547-01
LUAD(N=462)	12	4.4881	TCGA-97-8175-01
LUAD(N=462)	8	5.859	TCGA-86-8075-01
LUAD(N=462)	34	5.0291	TCGA-55-6985-01
LUAD(N=462)	27	5.1514	TCGA-55-A48X-01
LUAD(N=462)	1	4.9331	TCGA-44-2657-01
LUAD(N=462)	28	4.3492	TCGA-95-7562-01
LUAD(N=462)	19	5.0644	TCGA-55-7725-01
LUAD(N=462)	27	4.2064	TCGA-69-A59K-01
LUAD(N=462)	5	5.5562	TCGA-05-5715-01
LUAD(N=462)	31	5.0242	TCGA-55-A492-01
LUAD(N=462)	10	5.3618	TCGA-78-7145-01
LUAD(N=462)	35	4.8269	TCGA-MN-A4N5-01
LUAD(N=462)	49	3.242	TCGA-64-5778-01
LUAD(N=462)	1	5.7679	TCGA-J2-8194-01
LUAD(N=462)	27	6.4343	TCGA-55-A57B-01
LUAD(N=462)	62	4.7898	TCGA-86-7711-01
LUAD(N=462)	8	3.6872	TCGA-91-8496-01
LUAD(N=462)	0	5.6787	TCGA-86-8280-01
LUAD(N=462)	2	6.40666	TCGA-44-6146-01
LUAD(N=462)	9	5.6778	TCGA-78-7146-01
LUAD(N=462)	1	3.0774	TCGA-35-4122-01
LUAD(N=462)	2	4.5723	TCGA-44-5643-01
LUAD(N=462)	14	5.8256	TCGA-73-7498-01
LUAD(N=462)	21	5.8133	TCGA-75-6214-01
LUAD(N=462)	12	5.4813	TCGA-97-8174-01
LUAD(N=462)	47	3.907	TCGA-55-8620-01
LUAD(N=462)	7	4.6651	TCGA-62-8399-01
LUAD(N=462)	29	5.3202	TCGA-80-5607-01
LUAD(N=462)	108	3.7709	TCGA-49-AAR2-01
LUAD(N=462)	4	5.5466	TCGA-55-6543-01
LUAD(N=462)	6	5.09	TCGA-49-4501-01
LUAD(N=462)	12	5.2865	TCGA-78-7156-01
LUAD(N=462)	1	5.7082	TCGA-62-A46S-01
LUAD(N=462)	14	3.9847	TCGA-49-AARQ-01
LUAD(N=462)	7	6.0919	TCGA-93-A4JN-01
LUAD(N=462)	4	4.3709	TCGA-91-6847-01
LUAD(N=462)	8	4.3177	TCGA-55-6642-01
LUAD(N=462)	20	4.5772	TCGA-55-8203-01
LUAD(N=462)	66	5.4903	TCGA-44-7670-01
LUAD(N=462)	14	4.4496	TCGA-MP-A4TJ-01
LUAD(N=462)	3	6.2983	TCGA-38-6178-01
LUAD(N=462)	1	5.8316	TCGA-86-8074-01
LUAD(N=462)	11	5.2231	TCGA-55-8616-01
LUAD(N=462)	22	4.4919	TCGA-97-A4M0-01
LUAD(N=462)	1	5.3954	TCGA-49-6767-01
LUAD(N=462)	2	5.6476	TCGA-MP-A4T9-01
LUAD(N=462)	74	6.351	TCGA-86-8073-01
LUAD(N=462)	85	6.2763	TCGA-MN-A4N4-01
LUAD(N=462)	5	4.511	TCGA-97-A4M3-01
LUAD(N=462)	4	5.4016	TCGA-86-7714-01
LUAD(N=462)	45	3.3321	TCGA-49-4487-01
LUAD(N=462)	11	6.4699	TCGA-78-7542-01
LUAD(N=462)	3	5.2593	TCGA-95-A4VK-01
LUAD(N=462)	101	5.4473	TCGA-55-7994-01
LUAD(N=462)	12	4.7565	TCGA-49-6742-01
LUAD(N=462)	535	4.3576	TCGA-55-8506-01
LUAD(N=462)	10	5.0122	TCGA-MP-A4TA-01
LUAD(N=462)	14	5.383	TCGA-91-6828-01
LUAD(N=462)	11	2.7826	TCGA-35-5375-01
LUAD(N=462)	52	5.9723	TCGA-97-A4M7-01
LUAD(N=462)	11	4.9251	TCGA-78-7539-01
LUAD(N=462)	7	6.1475	TCGA-J2-8192-01
LUAD(N=462)	19	5.434	TCGA-86-7713-01
LUAD(N=462)	6	4.9374	TCGA-67-6216-01
LUAD(N=462)	0	4.8207	TCGA-44-A47G-01
LUAD(N=462)	25	5.2732	TCGA-78-7147-01
LUAD(N=462)	5	3.793	TCGA-44-3398-01
LUAD(N=462)	28	6.1687	TCGA-78-7633-01
LUAD(N=462)	17	4.2699	TCGA-78-7535-01
LUAD(N=462)	0	5.7279	TCGA-91-6835-01
LUAD(N=462)	3	6.1281	TCGA-55-6980-01
LUAD(N=462)	2	4.4739	TCGA-50-5936-01
LUAD(N=462)	12	5.6445	TCGA-73-4675-01
LUAD(N=462)	10	6.0713	TCGA-50-5932-01
LUAD(N=462)	9	4.8405	TCGA-49-AAR3-01
LUAD(N=462)	36	5.6868	TCGA-78-7154-01
LUAD(N=462)	4	4.8881	TCGA-55-7910-01
LUAD(N=462)	18	4.8729	TCGA-4B-A93V-01
LUAD(N=462)	0	5.1958	TCGA-91-6849-01
LUAD(N=462)	0	5.6404	TCGA-MP-A4SY-01
LUAD(N=462)	17	4.9969	TCGA-MP-A4SV-01
LUAD(N=462)	39	4.9137	TCGA-MP-A4T4-01
LUAD(N=462)	19	6.3815	TCGA-71-8520-01
LUAD(N=462)	15	4.0884	TCGA-44-7672-01
LUAD(N=462)	10	5.3031	TCGA-50-6593-01
LUAD(N=462)	24	4.5015	TCGA-69-7973-01
LUAD(N=462)	74	4.9937	TCGA-67-3771-01
LUAD(N=462)	21	5.5853	TCGA-99-8033-01
LUAD(N=462)	12	5.5814	TCGA-91-6848-01
LUAD(N=462)	0	5.6297	TCGA-93-A4JP-01
LUAD(N=462)	12	3.867	TCGA-44-7660-01
LUAD(N=462)	6	4.4523	TCGA-69-7760-01
LUAD(N=462)	2	5.6582	TCGA-69-7764-01
LUAD(N=462)	0	4.423	TCGA-95-7944-01
LUAD(N=462)	46	4.7033	TCGA-L9-A7SV-01
LUAD(N=462)	13	6.4668	TCGA-55-8089-01
LUAD(N=462)	6	5.6171	TCGA-55-7283-01
LUAD(N=462)	93	4.2072	TCGA-44-8117-01
LUAD(N=462)	17	5.796	TCGA-53-7626-01
LUAD(N=462)	61	4.3555	TCGA-86-8673-01
LUAD(N=462)	3	4.347	TCGA-95-8494-01
LUAD(N=462)	0	4.0366	TCGA-97-8171-01
LUAD(N=462)	21	4.839	TCGA-50-7109-01
LUAD(N=462)	17	4.9865	TCGA-44-6145-01
LUAD(N=462)	3	4.7682	TCGA-55-8085-01
LUAD(N=462)	137	4.9528	TCGA-NJ-A4YF-01
LUAD(N=462)	8	5.1473	TCGA-NJ-A7XG-01
LUAD(N=462)	4	5.5283	TCGA-05-4403-01
LUAD(N=462)	7	6.3834	TCGA-55-8097-01
LUAD(N=462)	97	5.3078	TCGA-NJ-A4YQ-01
LUAD(N=462)	16	6.6411	TCGA-97-7547-01
LUAD(N=462)	13	4.6508	TCGA-55-5899-01
LUAD(N=462)	56	4.9833	TCGA-05-4397-01
LUAD(N=462)	18	4.8095	TCGA-44-6777-01
LUAD(N=462)	3	4.7496	TCGA-55-7815-01
LUAD(N=462)	10	5.5379	TCGA-91-6830-01
LUAD(N=462)	57	5.7339	TCGA-44-A4SS-01
LUAD(N=462)	10	5.0934	TCGA-44-7659-01
LUAD(N=462)	42	3.9929	TCGA-53-7813-01
LUAD(N=462)	133	5.1538	TCGA-05-4382-01
LUAD(N=462)	11	3.3393	TCGA-05-5428-01
LUAD(N=462)	4	5.3705	TCGA-55-6986-01
LUAD(N=462)	0	4.1764	TCGA-91-A4BD-01
LUAD(N=462)	19	2.2482	TCGA-50-5066-01
LUAD(N=462)	46	6.4658	TCGA-49-AAR9-01
LUAD(N=462)	46	4.9946	TCGA-55-7907-01
LUAD(N=462)	139	5.8245	TCGA-95-7039-01
LUAD(N=462)	3	4.1676	TCGA-64-1680-01
LUAD(N=462)	0	4.9905	TCGA-J2-A4AE-01
LUAD(N=462)	37	4.4324	TCGA-86-8359-01
LUAD(N=462)	26	6.4363	TCGA-55-8614-01
LUAD(N=462)	17	4.7693	TCGA-55-7574-01
LUAD(N=462)	58	3.6703	TCGA-44-5644-01
LUAD(N=462)	2	5.0313	TCGA-95-7948-01
LUAD(N=462)	3	5.5784	TCGA-73-4677-01
LUAD(N=462)	14	5.8498	TCGA-50-5942-01
LUAD(N=462)	38	5.5693	TCGA-78-7167-01
LUAD(N=462)	25	5.1031	TCGA-78-8662-01
LUAD(N=462)	72	4.5608	TCGA-86-8585-01
LUAD(N=462)	1	4.6	TCGA-50-6591-01
LUAD(N=462)	6	5.1835	TCGA-MP-A4TK-01
LUAD(N=462)	65	4.7709	TCGA-55-7570-01
LUAD(N=462)	0	6.3475	TCGA-78-7163-01
LUAD(N=462)	34	4.2563	TCGA-05-4417-01
LUAD(N=462)	30	5.1587	TCGA-78-8655-01
LUAD(N=462)	16	5.306	TCGA-97-7554-01
LUAD(N=462)	7	5.1152	TCGA-49-4505-01
LUAD(N=462)	11	4.6195	TCGA-86-8669-01
LUAD(N=462)	8	5.0492	TCGA-55-8208-01
LUAD(N=462)	1	6.9611	TCGA-75-6206-01
LUAD(N=462)	1	4.4047	TCGA-55-6971-01
LUAD(N=462)	20	5.2013	TCGA-05-4410-01
LUAD(N=462)	22	4.7571	TCGA-55-8207-01
LUAD(N=462)	16	3.45757	TCGA-38-4625-01
LUAD(N=462)	46	4.741	TCGA-55-6968-01
LUAD(N=462)	5	4.6809	TCGA-L4-A4E5-01
LUAD(N=462)	6	5.4479	TCGA-93-7347-01
LUAD(N=462)	3	4.4784	TCGA-62-A471-01
LUAD(N=462)	8	4.9074	TCGA-97-8177-01
LUAD(N=462)	2	5.1724	TCGA-78-7160-01
LUAD(N=462)	12	5.7038	TCGA-97-7938-01
LUAD(N=462)	19	3.2572	TCGA-64-1677-01
LUAD(N=462)	8	5.4135	TCGA-69-8253-01
LUAD(N=462)	22	4.2892	TCGA-78-7159-01
LUAD(N=462)	11	5.3917	TCGA-97-7937-01
LUAD(N=462)	40	4.32942	TCGA-44-2656-01
LUAD(N=462)	18	6.4043	TCGA-J2-A4AD-01
LUAD(N=462)	12	5.0549	TCGA-97-A4LX-01
LUAD(N=462)	14	4.6708	TCGA-62-A46P-01
LUAD(N=462)	1	5.6106	TCGA-55-7728-01
LUAD(N=462)	2	3.3435	TCGA-49-4510-01
LUAD(N=462)	14	4.9298	TCGA-55-A493-01
LUAD(N=462)	5	3.9719	TCGA-MP-A4TE-01
LUAD(N=462)	20	5.5793	TCGA-44-2659-01
LUAD(N=462)	4	5.3934	TCGA-55-7227-01
LUAD(N=462)	8	5.7989	TCGA-55-1592-01
LUAD(N=462)	11	4.7919	TCGA-75-5146-01
LUAD(N=462)	11	3.6872	TCGA-64-5779-01
LUAD(N=462)	21	5.3882	TCGA-67-4679-01
LUAD(N=462)	30	5.2932	TCGA-44-7662-01
LUAD(N=462)	18	5.3622	TCGA-38-4626-01
LUAD(N=462)	12	4.4615	TCGA-86-8054-01
LUAD(N=462)	2	5.5252	TCGA-55-1596-01
LUAD(N=462)	15	4.8565	TCGA-86-6851-01
LUAD(N=462)	41	4.9978	TCGA-64-5775-01
LUAD(N=462)	10	4.3242	TCGA-64-1676-01
LUAD(N=462)	42	4.3024	TCGA-44-7667-01
LUAD(N=462)	28	6.7035	TCGA-86-8281-01
LUAD(N=462)	12	6.0195	TCGA-97-8179-01
LUAD(N=462)	4	4.4496	TCGA-78-7153-01
LUAD(N=462)	37	4.7693	TCGA-44-7669-01
LUAD(N=462)	19	4.6983	TCGA-95-A4VN-01
LUAD(N=462)	2	3.2343	TCGA-49-4494-01
LUAD(N=462)	5	4.9113	TCGA-49-6745-01
LUAD(N=462)	7	3.5299	TCGA-73-7499-01
LUAD(N=462)	9	4.9773	TCGA-78-7158-01
LUAD(N=462)	1	4.391	TCGA-71-6725-01
LUAD(N=462)	129	4.5886	TCGA-50-6590-01
LUAD(N=462)	4	5.2902	TCGA-55-A4DF-01
LUAD(N=462)	1	5.2434	TCGA-86-7954-01
LUAD(N=462)	8	4.5243	TCGA-L9-A743-01
LUAD(N=462)	1	6.1977	TCGA-55-8206-01
LUAD(N=462)	4	6.0663	TCGA-86-A4P7-01
LUAD(N=462)	13	4.4964	TCGA-95-8039-01
LUAD(N=462)	2	4.8812	TCGA-75-6212-01
LUAD(N=462)	5	4.0782	TCGA-50-5055-01
LUAD(N=462)	34	5.176	TCGA-78-7150-01
LUAD(N=462)	4	5.0193	TCGA-55-6978-01
LUAD(N=462)	39	4.4945	TCGA-78-7536-01
LUAD(N=462)	2	5.2192	TCGA-64-1681-01
LUAD(N=462)	2	4.858	TCGA-97-8552-01
LUAD(N=462)	8	4.9566	TCGA-49-AAR0-01
LUAD(N=462)	1	5.2476	TCGA-86-8668-01
LUAD(N=462)	86	5.5283	TCGA-53-7624-01
LUAD(N=462)	0	5.5466	TCGA-49-4490-01
LUAD(N=462)	20	4.8435	TCGA-50-5946-01
LUAD(N=462)	0	5.5355	TCGA-MP-A4TH-01
LUAD(N=462)	28	5.6442	TCGA-91-6829-01
LUAD(N=462)	4	6.5217	TCGA-78-7540-01
LUAD(N=462)	53	4.2616	TCGA-99-8025-01
LUAD(N=462)	121	5.6691	TCGA-44-8120-01
LUAD(N=462)	19	3.8441	TCGA-49-4486-01
LUAD(N=462)	33	4.1652	TCGA-55-8094-01
LUAD(N=462)	37	5.1281	TCGA-49-6743-01
LUAD(N=462)	0	4.9251	TCGA-99-AA5R-01
LUAD(N=462)	0	5.284	TCGA-MP-A4T7-01
LUAD(N=462)	9	4.981	TCGA-55-8090-01
LUAD(N=462)	2	5.9484	TCGA-97-A4M6-01
LUAD(N=462)	128	5.054	TCGA-05-4427-01
LUAD(N=462)	54	4.7394	TCGA-55-8514-01
LUAD(N=462)	0	5.1656	TCGA-62-8402-01
LUAD(N=462)	24	5.4087	TCGA-05-4424-01
LUAD(N=462)	38	4.1899	TCGA-38-4632-01
LUAD(N=462)	14	3.8915	TCGA-49-6761-01
LUAD(N=462)	44	4.4128	TCGA-05-4432-01
LUAD(N=462)	17	4.8319	TCGA-50-5072-01
LUAD(N=462)	21	3.4318	TCGA-50-5045-01
LUAD(N=462)	12	5.443	TCGA-86-8674-01
LUAD(N=462)	1	5.4053	TCGA-50-8457-01
LUAD(N=462)	20	5.8525	TCGA-95-7947-01
COAD(N=255)	4	4.7929	TCGA-F4-6854-01
COAD(N=255)	1	4.7442	TCGA-D5-5538-01
COAD(N=255)	0	5.0562	TCGA-AA-3511-01
COAD(N=255)	11	4.728	TCGA-QG-A5YX-01
COAD(N=255)	315	4.6047	TCGA-G4-6320-01
COAD(N=255)	0	4.5398	TCGA-CM-6164-01
COAD(N=255)	0	4.8856	TCGA-A6-A567-01
COAD(N=255)	5	4.5982	TCGA-DM-A0X9-01
COAD(N=255)	11	4.6921	TCGA-AY-A69D-01
COAD(N=255)	15	4.5318	TCGA-5M-AAT4-01
COAD(N=255)	14	5.3523	TCGA-CM-6167-01
COAD(N=255)	254	4.8455	TCGA-AZ-4615-01
COAD(N=255)	1048	3.8719	TCGA-AZ-6598-01
COAD(N=255)	325	4.2773	TCGA-A6-6653-01
COAD(N=255)	11	5.4826	TCGA-NH-A50V-01
COAD(N=255)	12	5.026	TCGA-AD-6899-01
COAD(N=255)	5	5.1375	TCGA-G4-6311-01
COAD(N=255)	28	5.2192	TCGA-NH-A6GC-01
COAD(N=255)	446	6.6045	TCGA-F4-6570-01
COAD(N=255)	6	4.7945	TCGA-G4-6627-01
COAD(N=255)	1	5.4909	TCGA-CM-6679-01
COAD(N=255)	48	4.3534	TCGA-A6-4105-01
COAD(N=255)	14	4.6148	TCGA-D5-6924-01
COAD(N=255)	17	5.0077	TCGA-AD-6965-01
COAD(N=255)	17	5.0644	TCGA-D5-6931-01
COAD(N=255)	8	4.05841	TCGA-A6-5656-01
COAD(N=255)	3	3.8431	TCGA-DM-A1DA-01
COAD(N=255)	2	4.402	TCGA-F4-6461-01
COAD(N=255)	125	4.5528	TCGA-F4-6703-01
COAD(N=255)	1117	4.5098	TCGA-AA-3492-01
COAD(N=255)	10	4.6972	TCGA-G4-6293-01
COAD(N=255)	12	4.9686	TCGA-AA-3496-01
COAD(N=255)	27	4.8992	TCGA-CK-6747-01
COAD(N=255)	2	4.248	TCGA-CA-5255-01
COAD(N=255)	8	5.1384	TCGA-CK-4947-01
COAD(N=255)	38	4.4706	TCGA-AD-6888-01
COAD(N=255)	1	4.8822	TCGA-F4-6809-01
COAD(N=255)	4	4.5675	TCGA-CK-5914-01
COAD(N=255)	0	5.2862	TCGA-D5-6532-01
COAD(N=255)	1	4.5994	TCGA-3L-AA1B-01
COAD(N=255)	1058	5.0833	TCGA-G4-6588-01
COAD(N=255)	8	4.5047	TCGA-A6-6138-01
COAD(N=255)	1	4.1277	TCGA-F4-6808-01
COAD(N=255)	6	4.1086	TCGA-G4-6317-01
COAD(N=255)	29	4.1828	TCGA-CK-4952-01
COAD(N=255)	324	4.9649	TCGA-G4-6309-01
COAD(N=255)	4	4.6364	TCGA-CM-5868-01
COAD(N=255)	509	4.5868	TCGA-AD-6964-01
COAD(N=255)	3	4.8495	TCGA-G4-6295-01
COAD(N=255)	2	4.0816	TCGA-NH-A50T-01
COAD(N=255)	5	4.9199	TCGA-D5-5539-01
COAD(N=255)	31	4.14	TCGA-AZ-4315-01
COAD(N=255)	10	4.4074	TCGA-AA-3506-01
COAD(N=255)	622	4.5009	TCGA-AU-6004-01
COAD(N=255)	7	4.7651	TCGA-AY-6386-01
COAD(N=255)	566	3.92036	TCGA-A6-5661-01
COAD(N=255)	69	4.9727	TCGA-CA-5797-01
COAD(N=255)	1	4.6514	TCGA-A6-5662-01
COAD(N=255)	5	5.0197	TCGA-AA-3489-01
COAD(N=255)	4	4.6821	TCGA-DM-A1D8-01
COAD(N=255)	8	4.8309	TCGA-AZ-6599-01
COAD(N=255)	11	4.4706	TCGA-G4-6299-01
COAD(N=255)	333	4.9663	TCGA-AD-5900-01
COAD(N=255)	11	3.6916	TCGA-A6-5666-01
COAD(N=255)	2	4.6871	TCGA-DM-A1D7-01
COAD(N=255)	2	4.4938	TCGA-AA-A02Y-01
COAD(N=255)	3	4.7491	TCGA-CM-6676-01
COAD(N=255)	1	4.0558	TCGA-G4-6626-01
COAD(N=255)	13	4.5466	TCGA-AA-3660-01
COAD(N=255)	3	4.8233	TCGA-NH-A8F7-01
COAD(N=255)	0	5.124	TCGA-AA-3712-01
COAD(N=255)	281	3.866	TCGA-CM-4743-01
COAD(N=255)	27	4.8319	TCGA-G4-6315-01
COAD(N=255)	26	4.3162	TCGA-CM-4747-01
COAD(N=255)	9	4.6764	TCGA-AZ-6606-01
COAD(N=255)	12	5.0317	TCGA-DM-A285-01
COAD(N=255)	4	4.6165	TCGA-A6-6142-01
COAD(N=255)	329	5.1396	TCGA-CM-6171-01
COAD(N=255)	3	5.1764	TCGA-A6-2675-01
COAD(N=255)	7	4.4128	TCGA-G4-6298-01
COAD(N=255)	0	5.2891	TCGA-AM-5820-01
COAD(N=255)	2	5.7318	TCGA-A6-6654-01
COAD(N=255)	2	5.7334	TCGA-CK-5912-01
COAD(N=255)	7	4.0216	TCGA-CM-5349-01
COAD(N=255)	3	4.9036	TCGA-DM-A28A-01
COAD(N=255)	999	5.4463	TCGA-WS-AB45-01
COAD(N=255)	13	4.1668	TCGA-CM-6677-01
COAD(N=255)	10	4.565	TCGA-AD-6548-01
COAD(N=255)	0	5.2304	TCGA-D5-6926-01
COAD(N=255)	2	3.9974	TCGA-AZ-4616-01
COAD(N=255)	10	4.9561	TCGA-AA-A02K-01
COAD(N=255)	0	5.104	TCGA-D5-6898-01
COAD(N=255)	0	4.4673	TCGA-DM-A1HA-01
COAD(N=255)	3	3.6555	TCGA-DM-A280-01
COAD(N=255)	692	5.373	TCGA-AA-3713-01
COAD(N=255)	5	4.6089	TCGA-AA-3502-01
COAD(N=255)	593	4.7666	TCGA-CK-5913-01
COAD(N=255)	50	5.5928	TCGA-4N-A93T-01
COAD(N=255)	0	4.9194	TCGA-F4-6855-01
COAD(N=255)	34	4.4842	TCGA-QG-A5YV-01
COAD(N=255)	4	3.9204	TCGA-CM-6166-01
COAD(N=255)	0	5.0926	TCGA-G4-6321-01
COAD(N=255)	11	5.4002	TCGA-D5-6539-01
COAD(N=255)	9	3.9783	TCGA-CM-5344-01
COAD(N=255)	9	4.2518	TCGA-D5-6536-01
COAD(N=255)	7	4.8783	TCGA-A6-A566-01
COAD(N=255)	259	3.9947	TCGA-AM-5821-01
COAD(N=255)	26	4.9388	TCGA-AD-6901-01
COAD(N=255)	1	4.7247	TCGA-CM-6161-01
COAD(N=255)	3	4.5503	TCGA-5M-AAT5-01
COAD(N=255)	1	4.5098	TCGA-CK-6748-01
COAD(N=255)	891	4.9524	TCGA-D5-6540-01
COAD(N=255)	521	4.6347	TCGA-5M-AAT6-01
COAD(N=255)	255	4.9151	TCGA-G4-6302-01
COAD(N=255)	0	5.4493	TCGA-NH-A6GA-01
COAD(N=255)	4	4.9122	TCGA-AA-3655-01
COAD(N=255)	10	4.6171	TCGA-A6-6652-01
COAD(N=255)	0	4.7913	TCGA-CM-5863-01
COAD(N=255)	9	4.0748	TCGA-CM-6678-01
COAD(N=255)	9	4.2258	TCGA-D5-6529-01
COAD(N=255)	9	4.2419	TCGA-T9-A92H-01
COAD(N=255)	3	5.0579	TCGA-A6-5657-01
COAD(N=255)	493	4.6938	TCGA-D5-6930-01
COAD(N=255)	17	4.2465	TCGA-QL-A97D-01
COAD(N=255)	2	5.0892	TCGA-D5-7000-01
COAD(N=255)	17	4.8187	TCGA-D5-5537-01
COAD(N=255)	1	4.2017	TCGA-CM-5860-01
COAD(N=255)	245	5	TCGA-AA-A01P-01
COAD(N=255)	22	4.4771	TCGA-CK-4950-01
COAD(N=255)	11	4.9778	TCGA-SS-A7HO-01
COAD(N=255)	0	4.0162	TCGA-D5-6537-01
COAD(N=255)	12	5.2273	TCGA-CA-5254-01
COAD(N=255)	1	4.2281	TCGA-AD-A5EK-01
COAD(N=255)	307	4.9874	TCGA-CK-6746-01
COAD(N=255)	18	5.1823	TCGA-CA-6718-01
COAD(N=255)	4	4.4135	TCGA-AY-5543-01
COAD(N=255)	1	5.0955	TCGA-F4-6807-01
COAD(N=255)	10	5.213	TCGA-CK-5915-01
COAD(N=255)	0	3.74584	TCGA-A6-3810-01
COAD(N=255)	271	4.12581	TCGA-A6-6781-01
COAD(N=255)	0	4.4324	TCGA-NH-A50U-01
COAD(N=255)	0	4.3234	TCGA-DM-A1D4-01
COAD(N=255)	415	4.1986	TCGA-G4-6304-01
COAD(N=255)	89	4.8375	TCGA-CA-6717-01
COAD(N=255)	8	4.706	TCGA-DM-A1D0-01
COAD(N=255)	4	5.4373	TCGA-CM-6675-01
COAD(N=255)	1	4.5796	TCGA-G4-6307-01
COAD(N=255)	4	4.4006	TCGA-AZ-5403-01
COAD(N=255)	476	5.365	TCGA-CM-5861-01
COAD(N=255)	1	5.5766	TCGA-CA-5796-01
COAD(N=255)	541	4.9528	TCGA-D5-6928-01
COAD(N=255)	9	3.2557	TCGA-AA-3685-01
COAD(N=255)	1	4.8131	TCGA-A6-5664-01
COAD(N=255)	0	4.3017	TCGA-AZ-5407-01
COAD(N=255)	57	5.3151	TCGA-AY-6196-01
COAD(N=255)	12	4.9435	TCGA-D5-6920-01
COAD(N=255)	4	5.5333	TCGA-G4-6297-01
COAD(N=255)	576	4.3249	TCGA-A6-2686-01
COAD(N=255)	14	5.2411	TCGA-DM-A28F-01
COAD(N=255)	14	3.0515	TCGA-CA-5256-01
COAD(N=255)	3	4.6341	TCGA-G4-6306-01
COAD(N=255)	6	5.8765	TCGA-D5-6922-01
COAD(N=255)	614	4.8817	TCGA-CK-5916-01
COAD(N=255)	9	3.9166	TCGA-DM-A288-01
COAD(N=255)	585	4.1547	TCGA-DM-A1HB-01
COAD(N=255)	4	5.1031	TCGA-CM-6170-01
COAD(N=255)	1	4.6142	TCGA-CK-4948-01
COAD(N=255)	7	5.2392	TCGA-CM-6165-01
COAD(N=255)	459	5.0841	TCGA-F4-6856-01
COAD(N=255)	3	4.7066	TCGA-F4-6569-01
COAD(N=255)	0	4.8274	TCGA-D5-6535-01
COAD(N=255)	378	5.0453	TCGA-AD-6895-01
COAD(N=255)	22	4.6312	TCGA-NH-A8F8-01
COAD(N=255)	7	4.4277	TCGA-D5-6929-01
COAD(N=255)	10	5.0077	TCGA-A6-5667-01
COAD(N=255)	2	4.5336	TCGA-CM-6169-01
COAD(N=255)	11	5.0313	TCGA-CM-6680-01
COAD(N=255)	636	4.0773	TCGA-AA-3663-01
COAD(N=255)	0	5.0264	TCGA-A6-6648-01
COAD(N=255)	22	4.3938	TCGA-RU-A8FL-01
COAD(N=255)	3	4.9737	TCGA-CA-6719-01
COAD(N=255)	1	5.5336	TCGA-A6-6649-01
COAD(N=255)	26	4.613	TCGA-NH-A6GB-01
COAD(N=255)	29	3.5899	TCGA-AZ-4614-01
COAD(N=255)	16	3.6905	TCGA-CM-5864-01
COAD(N=255)	262	5.1473	TCGA-D5-6927-01
COAD(N=255)	5	4.2541	TCGA-QG-A5YW-01
COAD(N=255)	19	4.7415	TCGA-AA-A01X-01
COAD(N=255)	3	4.8704	TCGA-D5-6538-01
COAD(N=255)	1	5.5571	TCGA-CM-6172-01
COAD(N=255)	4	5.0909	TCGA-D5-6533-01
COAD(N=255)	6	4.5583	TCGA-DM-A28H-01
COAD(N=255)	0	4.8243	TCGA-F4-6460-01
COAD(N=255)	46	3.0619	TCGA-D5-5540-01
COAD(N=255)	3	4.6404	TCGA-F4-6463-01
COAD(N=255)	3	4.7887	TCGA-AZ-6600-01
COAD(N=255)	900	4.8842	TCGA-D5-6530-01
COAD(N=255)	14	5.1136	TCGA-G4-6303-01
COAD(N=255)	0	3.7259	TCGA-AZ-4682-01
COAD(N=255)	441	5.4081	TCGA-G4-6586-01
COAD(N=255)	4	4.5862	TCGA-AD-6890-01
COAD(N=255)	1284	4.5021	TCGA-AD-6889-01
COAD(N=255)	15	4.1555	TCGA-DM-A28K-01
COAD(N=255)	402	5.5323	TCGA-QG-A5Z2-01
COAD(N=255)	8	4.6059	TCGA-G4-6294-01
COAD(N=255)	19	5.3851	TCGA-QG-A5Z1-01
COAD(N=255)	539	4.6294	TCGA-G4-6628-01
COAD(N=255)	6	5.7661	TCGA-D5-6534-01
COAD(N=255)	4	3.87092	TCGA-A6-5659-01
COAD(N=255)	8	4.1732	TCGA-A6-5660-01
COAD(N=255)	1	3.5559	TCGA-CM-5862-01
COAD(N=255)	5	5.0816	TCGA-F4-6805-01
COAD(N=255)	626	4.9336	TCGA-CK-4951-01
COAD(N=255)	11	4.7507	TCGA-CK-6751-01
COAD(N=255)	1116	4.3421	TCGA-AD-A5EJ-01
COAD(N=255)	18	5.0104	TCGA-CA-6716-01
COAD(N=255)	3	4.7159	TCGA-AA-A01Z-01
COAD(N=255)	3	5.0939	TCGA-F4-6806-01
COAD(N=255)	9	4.2056	TCGA-D5-6531-01
COAD(N=255)	25	4.7856	TCGA-DM-A1D9-01
COAD(N=255)	3	4.6713	TCGA-DM-A0XF-01
COAD(N=255)	4	5.1946	TCGA-AZ-6603-01
COAD(N=255)	1586	5.1264	TCGA-NH-A5IV-01
COAD(N=255)	3	4.7908	TCGA-A6-6651-01
COAD(N=255)	0	4.4641	TCGA-CA-6715-01
COAD(N=255)	474	4.9016	TCGA-CM-6674-01
COAD(N=255)	8	4.756	TCGA-D5-6932-01
COAD(N=255)	7	5.2072	TCGA-A6-6137-01
COAD(N=255)	20	3.8944	TCGA-DM-A28M-01
COAD(N=255)	7	5.9586	TCGA-F4-6459-01
COAD(N=255)	1	3.82859	TCGA-A6-2684-01
COAD(N=255)	379	3.8762	TCGA-A6-6780-01
COAD(N=255)	0	5.2219	TCGA-AZ-6607-01
COAD(N=255)	3	4.4602	TCGA-G4-6322-01
COAD(N=255)	57	4.8405	TCGA-A6-A565-01
COAD(N=255)	5	4.7165	TCGA-A6-A56B-01
COAD(N=255)	12	4.2646	TCGA-AY-A54L-01
COAD(N=255)	8	2.98297	TCGA-A6-2677-01
COAD(N=255)	147	5.1498	TCGA-CM-6162-01
COAD(N=255)	3	4.565	TCGA-AD-6963-01
COAD(N=255)	756	4.7528	TCGA-AY-6197-01
COAD(N=255)	2	5.2567	TCGA-D5-6541-01
COAD(N=255)	6	5.3837	TCGA-CM-5348-01
COAD(N=255)	6	4.3024	TCGA-4T-AA8H-01
COAD(N=255)	7	4.2304	TCGA-5M-AATA-01
COAD(N=255)	1	4.466	TCGA-DM-A28G-01
COAD(N=255)	8	4.7539	TCGA-5M-AATE-01
COAD(N=255)	10	5.2177	TCGA-DM-A28C-01
COAD(N=255)	23	3.7378	TCGA-DM-A0XD-01
COAD(N=255)	4	3.9232	TCGA-DM-A282-01
COAD(N=255)	36	3.5035	TCGA-CM-4744-01
COAD(N=255)	0	4.9208	TCGA-AZ-6605-01
COAD(N=255)	9	4.8822	TCGA-AY-A71X-01
[truncated: 5,699 more rows]

## Sheet: NEO_r_value
type	r_value
GBM	0.0732046
LGG	0.0752165
CESC	0.0301771
LUAD	-0.1065
COAD	0.0490426
BRCA	-0.0531102
SARC	0.0852833
KIRP	-0.0339548
PRAD	-0.0445416
UCEC	0.270818
HNSC	-0.128955
KIRC	-0.0363634
LUSC	0.0611761
THYM	-0.0828624
LIHC	0.0226386
THCA	0.0314327
MESO	-0.281707
READ	0.148859
PAAD	0.150552
TGCT	0.195357
PCPG	-0.196988
SKCM	-0.0390706
UVM	-0.0691699
UCS	-0.151697
BLCA	-0.111318
ACC	0.187127
KICH	0.00521728
CHOL	-0.275011
DLBC	0.0794908
