# Supplementary material for: Dynamic Expression of Palmitoylation Regulators across Human Organ Development and Cancers Based on Bioinformatics
Source: Curr Issues Mol Biol. 2022 Sep 27;44(10):4472–89. doi: 10.3390/cimb44100306 (PMC9600046; doi:10.3390/cimb44100306)
Supplement: Supplementary file 1 [file cimb-44-00306-s001.zip › Supplementary_Table S2.csv]

Immu	StromalScore	StromalScore	StromalScore	StromalScore	ImmuneScore	ImmuneScore	ImmuneScore	ImmuneScore	ESTIMATEScore	ESTIMATEScore	ESTIMATEScore	ESTIMATEScore
Method	pearson_R	pearson_P	spearman_P	spearman_R	pearson_R	pearson_P	spearman_P	spearman_R	pearson_R	pearson_P	spearman_P	spearman_R
TCGA-GBM(N=152)	-0.299192391	0.000180837	-0.235092099	0.003551659	-0.280842017	0.000457164	-0.28623102	0.000350422	-0.2997062	0.000176042	-0.261681604	0.00112782
TCGA-GBMLGG(N=656)	-0.464649983	1.92E-36	-0.491929322	2.84E-41	-0.481219368	2.52E-39	-0.508956388	1.62E-44	-0.486774805	2.51E-40	-0.51527191	9.09E-46
TCGA-LGG(N=504)	-0.319086213	2.16E-13	-0.384305955	3.48E-19	-0.393224338	4.38E-20	-0.445403908	6.23E-26	-0.375229417	2.69E-18	-0.436577711	7.19E-25
TCGA-UCEC(N=178)	-0.114355338	0.128528036	-0.111674463	0.137789712	-0.251181581	0.000719717	-0.231569921	0.001869935	-0.216830057	0.003647265	-0.193476932	0.009664282
TARGET-LAML(N=142)	-0.062238141	0.461845379	-0.106148307	0.20865286	-0.095784141	0.256827847	-0.112053935	0.18429045	-0.086788606	0.304418639	-0.108065855	0.200501659
TCGA-BRCA(N=1077)	-0.01110266	0.715894126	-0.013487616	0.658389106	-0.244533845	3.97E-16	-0.246627079	2.18E-16	-0.158936768	1.58E-07	-0.165578603	4.62E-08
TCGA-CESC(N=291)	-0.078746756	0.180369422	-0.085686496	0.144814686	-0.225004741	0.000108153	-0.281503013	1.06E-06	-0.183549327	0.001664294	-0.223047763	0.000124556
TCGA-LUAD(N=500)	0.047690904	0.287175771	0.028748892	0.521283371	-0.015920538	0.722495538	-0.031901314	0.476631462	0.014315386	0.749486188	-0.006290013	0.888424293
TCGA-ESCA(N=181)	-0.166524891	0.025057885	-0.159256261	0.032240509	-0.254516355	0.000545089	-0.22212598	0.002652914	-0.229221483	0.001909694	-0.217596762	0.003255484
TCGA-STES(N=569)	-0.204614907	8.55E-07	-0.224595432	6.13E-08	-0.236562503	1.12E-08	-0.251623037	1.15E-09	-0.238665541	8.21E-09	-0.260324246	2.88E-10
TCGA-SARC(N=258)	-0.298154317	1.08E-06	-0.351034069	6.77E-09	-0.368490783	1.02E-09	-0.393083709	5.80E-11	-0.366110047	1.33E-09	-0.40305806	1.69E-11
TCGA-KIRP(N=285)	-0.228586554	9.87E-05	-0.197211614	0.000815088	-0.330663533	1.07E-08	-0.304296911	1.61E-07	-0.30674203	1.27E-07	-0.280221427	1.54E-06
TCGA-KIPAN(N=878)	0.048536961	0.150718012	0.068255294	0.043181086	-0.119911587	0.000369583	-0.101887047	0.002506218	-0.042770985	0.205468786	-0.016826195	0.61855239
TCGA-COAD(N=282)	0.105307373	0.077485015	0.075043361	0.20898287	0.025792754	0.666263406	0.009822896	0.869553424	0.071858743	0.229011415	0.051238631	0.391343025
TCGA-COADREAD(N=373)	0.116149551	0.024878191	0.094237114	0.069070268	0.052015823	0.316392386	0.041510851	0.424080847	0.091381777	0.07796101	0.07627687	0.141467151
TCGA-PRAD(N=495)	-0.107648533	0.016577825	-0.136169146	0.00239687	-0.172415553	0.000115628	-0.202034235	5.89E-06	-0.156227473	0.000485744	-0.179800608	5.75E-05
TCGA-STAD(N=388)	-0.064865372	0.202337475	-0.082733814	0.103694668	-0.070564698	0.165378201	-0.090525163	0.074905244	-0.074073859	0.145287721	-0.09772617	0.054432648
TCGA-HNSC(N=517)	-0.089538298	0.041845817	-0.115415305	0.008621681	0.003620728	0.934545102	0.003281602	0.940663899	-0.04550387	0.30175323	-0.060992402	0.166127218
TCGA-KIRC(N=528)	0.006966647	0.873114334	0.005505271	0.899571518	-0.147575457	0.000669848	-0.155914498	0.00032294	-0.091554971	0.03544776	-0.087582475	0.04426325
TCGA-LUSC(N=491)	-0.03390654	0.453484008	-0.032754193	0.468986624	-0.011874681	0.792963778	-0.001217952	0.978524142	-0.023513306	0.603228114	-0.01941369	0.667833976
TCGA-THYM(N=118)	0.172697462	0.061472537	0.198979955	0.030763747	-0.347470748	0.000115657	-0.362965033	5.36E-05	-0.168281692	0.068521621	-0.15251003	0.099207704
TCGA-LIHC(N=363)	0.123032993	0.019030959	0.073782656	0.160672713	0.010154181	0.847114932	-0.022499164	0.669202878	0.063357588	0.22852351	0.022192075	0.673456134
TARGET-WT(N=80)	-0.441021518	4.23E-05	-0.408019504	0.000172037	-0.349856438	0.001466994	-0.321084895	0.003684464	-0.438041806	4.83E-05	-0.378529484	0.000535851
TCGA-SKCM-P(N=101)	-0.186083754	0.062441296	-0.237355264	0.016850238	-0.175768307	0.078717332	-0.244938611	0.013560841	-0.195493915	0.050091455	-0.253704308	0.010467511
TCGA-SKCM(N=452)	0.037342803	0.428362553	0.028261236	0.548974116	0.013112919	0.780993562	-0.008054209	0.864409769	0.023679759	0.615586651	0.008202611	0.861936234
TCGA-BLCA(N=405)	-0.36896036	1.66E-14	-0.376971461	4.01E-15	-0.292331283	2.02E-09	-0.289953375	2.76E-09	-0.352743027	2.61E-13	-0.355174534	1.74E-13
TCGA-SKCM-M(N=351)	0.056590324	0.290381567	0.066073336	0.216898381	0.018768926	0.72602932	0.018478844	0.730097708	0.035241961	0.510469264	0.03990161	0.456158901
TCGA-THCA(N=503)	-0.187165206	2.39E-05	-0.196832141	8.70E-06	-0.302165534	4.44E-12	-0.304470233	3.00E-12	-0.276061986	3.00E-10	-0.279110687	1.87E-10
TARGET-NB(N=153)	-0.40895789	1.53E-07	-0.350024627	9.20E-06	-0.171662209	0.033862364	-0.173416564	0.032055077	-0.295749803	0.00020595	-0.279937276	0.000457341
TCGA-MESO(N=85)	0.093361662	0.395399734	0.08361021	0.446795618	-0.135857248	0.215066557	-0.16444514	0.132601989	-0.050304151	0.647524363	-0.057176641	0.603228748
TCGA-READ(N=91)	0.144796931	0.170871506	0.128535196	0.224655471	0.148907266	0.158919334	0.16695799	0.113698675	0.15479678	0.142893422	0.151238488	0.152423066
TCGA-OV(N=416)	-0.058258248	0.235751995	-0.049284937	0.315955314	-0.048718561	0.321555533	-0.023463973	0.633220619	-0.05789599	0.238682395	-0.03457325	0.481901735
TCGA-UVM(N=79)	-0.012412219	0.913545201	0.000255628	0.998216044	0.126889299	0.265128372	0.008350527	0.941774812	0.088053086	0.44031645	0.006415055	0.955254181
TCGA-PAAD(N=177)	0.160048654	0.033340464	0.124956447	0.097487083	0.0732612	0.332508254	0.065124427	0.389127877	0.122182827	0.105211787	0.108690759	0.14985017
TCGA-TGCT(N=132)	0.186581732	0.032183808	0.161322977	0.064608884	-0.266046798	0.002046913	-0.236308563	0.006373837	-0.132162194	0.13088518	-0.115420038	0.187546593
TCGA-UCS(N=56)	-0.124392099	0.361019232	-0.085072204	0.533024862	-0.25391174	0.058982799	-0.222336154	0.099563863	-0.219991214	0.103279118	-0.194514228	0.150848006
TCGA-LAML(N=214)	0.334977832	5.24E-07	0.280610831	3.11E-05	-0.065687456	0.338905579	-0.122969546	0.072626179	0.120882303	0.077652097	0.031884825	0.642776073
TARGET-ALL(N=86)	0.058570101	0.592187374	0.060176908	0.582051363	0.060300735	0.581273558	0.048958604	0.654407054	0.066964122	0.540140314	0.046033731	0.673845877
TCGA-PCPG(N=177)	-0.277818903	0.000181167	-0.263228599	0.000400352	-0.275637196	0.000204552	-0.206232129	0.005887741	-0.292512297	7.79E-05	-0.255859765	0.000587609
TCGA-ACC(N=77)	-0.104816528	0.364290621	-0.130336193	0.258553762	-0.139304129	0.226933177	-0.14802984	0.198861534	-0.130178409	0.259135626	-0.144914391	0.208583749
TARGET-ALL-R(N=96)	0.260832939	0.010265723	0.275269125	0.006639674	0.063586893	0.538235247	0.162206712	0.114347161	0.138952295	0.176960024	0.222068471	0.029664253
TCGA-DLBC(N=46)	-0.081415575	0.59065637	-0.039903787	0.792321438	0.31463681	0.033199719	0.289502899	0.050999707	0.148945243	0.32319213	0.177500925	0.237945322
TCGA-KICH(N=65)	-0.146468594	0.244324137	-0.076268316	0.54594709	-0.196597763	0.11650157	-0.154918651	0.217868919	-0.181613119	0.147652675	-0.133283799	0.2898506
TCGA-CHOL(N=36)	0.179500084	0.29485546	0.149034749	0.385662768	-0.014354543	0.933778514	-0.054826255	0.750798222	0.061942126	0.719683802	0.037065637	0.830064572
