# Supplementary material for: Dynamic Expression of Palmitoylation Regulators across Human Organ Development and Cancers Based on Bioinformatics
Source: Curr Issues Mol Biol. 2022 Sep 27;44(10):4472–89. doi: 10.3390/cimb44100306 (PMC9600046; doi:10.3390/cimb44100306)
Supplement: Supplementary file 1 [file cimb-44-00306-s001.zip › Supplementary_Table S3.xlsx]

## Sheet: gsea_brain_ZDHHC7
ID	Description	setSize	enrichmentScore	NES	pvalue	p.adjust	qvalues	rank	leading_edge	core_enrichment
HALLMARK_MYC_TARGETS_V2	HALLMARK_MYC_TARGETS_V2	58	0.53565	2.11827	3.21786e-06	2.29847e-05	6.29055e-06	5850	tags=69%, list=32%, signal=47%	23223/51154/5245/80324/9221/51491/51388/10514/9064/64216/83743/3177/6949/7965/9136/9238/10528/3329/1844/79077/26354/4869/27340/2193/92856/4173/10196/23481/29078/5036/27346/4839/10244/23160/23082/56915/4174/6652/79711/1019
HALLMARK_OXIDATIVE_PHOSPHORYLATION	HALLMARK_OXIDATIVE_PHOSPHORYLATION	200	0.498316	2.3536	1e-10	2.5e-09	6.84211e-10	6698	tags=68%, list=37%, signal=44%	3313/10939/10935/1737/2395/23203/3052/9131/3945/7416/64960/5018/2806/1738/10989/9927/3939/515/4967/518/5250/292/2108/5162/4552/6391/29088/10312/8803/506/92609/80273/2821/51318/56993/4709/1892/3032/4190/4129/9551/7384/2271/4942/54884/481/65003/4191/528/6389/3419/1537/56945/56898/4835/6392/2746/3420/9377/529/4700/10440/10128/4711/4718/8402/7386/516/51606/26517/4697/537/1666/8050/291/5160/4694/29796…
HALLMARK_EPITHELIAL_MESENCHYMAL_TRANSITION	HALLMARK_EPITHELIAL_MESENCHYMAL_TRANSITION	199	0.466494	2.20152	1e-10	2.5e-09	6.84211e-10	5310	tags=52%, list=29%, signal=37%	26585/4638/2199/3487/7045/7168/6641/10516/2697/4907/6586/10631/5118/9353/7049/1290/7169/2201/2200/3693/5351/2303/22943/1601/4487/1490/4060/4313/4017/7474/3678/25878/6382/6591/3915/2191/22795/5396/6444/800/1009/284217/813/633/4837/7040/7857/871/7980/10272/11010/1281/26577/627/4314/6678/3486/3491/1277/7070/1284/5999/4232/2331/7424/1296/10398/3688/6385/5768/2026/966/6535/4616/5159/2669/7078/11167/70…
HALLMARK_REACTIVE_OXYGEN_SPECIES_PATHWAY	HALLMARK_REACTIVE_OXYGEN_SPECIES_PATHWAY	49	0.45815	1.75892	0.00271887	0.00513571	0.00140556	6992	tags=65%, list=38%, signal=40%	4257/9588/4046/4353/2242/7001/5524/2729/5214/5621/6648/26034/2730/3163/6647/4700/4363/51022/2539/7295/1728/2936/2068/2879/10587/7296/3726/10542/10549/4720/2512/5052
HALLMARK_APICAL_SURFACE	HALLMARK_APICAL_SURFACE	44	0.455744	1.72318	0.00218145	0.00442907	0.00121217	4973	tags=43%, list=27%, signal=31%	202/2319/55959/5205/2683/6517/1946/8406/351/2050/5314/4067/7070/6376/84632/3560/672/255738/2625
HALLMARK_MTORC1_SIGNALING	HALLMARK_MTORC1_SIGNALING	199	0.43218	2.03958	6.99612e-10	1.16602e-08	3.19121e-09	4950	tags=48%, list=27%, signal=36%	2107/4074/2023/10061/6515/7453/3313/7283/7184/8624/4836/56902/3309/10197/5701/5641/2632/2597/80777/7167/7494/10452/5230/10989/205/3939/811/5478/10135/1075/27071/6510/27101/5236/1718/23753/488/5606/5684/9136/3308/586/10963/2965/29110/2821/2805/4199/5718/4860/871/3251/226/2729/8553/10622/54843/3145/5704/6184/23062/81873/7277/8935/8878/6513/3329/5723/120/23760/6117/2181/5693/516/4048/10875/116496/41…
HALLMARK_TGF_BETA_SIGNALING	HALLMARK_TGF_BETA_SIGNALING	54	0.427589	1.66585	0.00469014	0.0078169	0.00213936	3237	tags=33%, list=18%, signal=27%	4092/8412/3399/5499/4088/650/999/3460/3397/7044/4091/387/7082/7040/25937/5045/2280/4053
HALLMARK_UNFOLDED_PROTEIN_RESPONSE	HALLMARK_UNFOLDED_PROTEIN_RESPONSE	112	0.415851	1.8251	3.79797e-05	0.000137861	3.77304e-05	2786	tags=32%, list=15%, signal=27%	6464/10525/3313/7184/3309/55153/1981/6734/58477/9221/25804/6347/5611/11015/5073/7494/811/3376/1662/9136/1639/467/8602/10775/7466/10130/22926/55062/10113/9114/28972/11260/64859/3434/64061/10528
HALLMARK_INTERFERON_ALPHA_RESPONSE	HALLMARK_INTERFERON_ALPHA_RESPONSE	96	0.413558	1.78305	0.000152516	0.000476613	0.000130442	8078	tags=69%, list=44%, signal=38%	7453/8767/7706/9830/27074/51056/10161/3566/5684/716/841/10581/51667/4061/5359/135112/1997/115361/85363/79132/3107/55008/3659/11274/4343/2766/10410/129607/64108/116071/4938/3433/87178/4599/567/7318/3669/972/1435/684/3430/2634/94240/91543/3437/8638/8519/9111/6890/55601/834/5698/9636/54625/5696/6373/3627/103/3429/64761/55603/3600/64135/3660/6737/219285
HALLMARK_INFLAMMATORY_RESPONSE	HALLMARK_INFLAMMATORY_RESPONSE	199	0.403858	1.90592	7.26189e-08	9.07737e-07	2.48433e-07	7493	tags=63%, list=41%, signal=38%	7130/8767/255488/6347/9966/970/187/2719/27074/3037/5029/7855/3460/6542/3678/958/23533/10135/3386/3566/10203/2811/8578/1536/490/1236/488/2769/1317/3269/2643/10886/9435/1604/8809/8685/7162/5099/1240/4067/23166/4061/3383/10316/3937/133/3554/3601/10125/5791/6376/166929/3575/4210/558/4790/6892/114548/7432/3593/3659/719/4233/3560/1026/8744/3656/6361/9180/366/2550/8877/2069/3552/64108/6401/6098/6369/373…
HALLMARK_FATTY_ACID_METABOLISM	HALLMARK_FATTY_ACID_METABOLISM	155	0.391719	1.80231	1.30137e-05	7.22981e-05	1.97868e-05	6465	tags=53%, list=36%, signal=34%	9588/3052/1962/1738/216/3939/6296/2027/8801/1376/5162/1718/6391/2182/7389/4683/658/10808/8803/4199/3320/4128/226/6999/1892/8639/158/2954/3032/4190/7533/4282/3248/2271/54884/5092/5465/4191/594/7390/23710/6389/1429/6392/3420/3155/2026/11343/2752/1543/760/1666/2639/5160/51703/223/50/58505/2572/4913/51170/60481/11185/7358/84693/3956/762/549/10961/92840/3295/3033/765/9380/874/37/6281/10005/364/23417/1…
HALLMARK_ESTROGEN_RESPONSE_LATE	HALLMARK_ESTROGEN_RESPONSE_LATE	199	0.391061	1.84553	4.55527e-07	4.55527e-06	1.24671e-06	6012	tags=49%, list=33%, signal=33%	2030/6768/64065/3547/23650/11187/3487/10105/7074/58495/3993/51599/8309/5777/27134/8645/11001/26509/2296/23596/2317/9060/7494/999/4192/6566/6337/10551/3880/4299/990/8416/11098/8204/51195/56521/3572/2289/3251/7980/7466/9215/7162/5121/29887/9547/3613/6990/4232/1844/1960/5603/120/595/2288/55540/26353/10874/760/5104/55806/1717/493/645/4681/9368/445/10439/9455/7538/4338/1363/60481/4277/22824/3705/2013/…
HALLMARK_GLYCOLYSIS	HALLMARK_GLYCOLYSIS	200	0.38904	1.83748	1.33917e-06	1.11598e-05	3.05425e-06	3646	tags=36%, list=20%, signal=29%	2023/5315/3597/56052/3309/64132/8974/7045/4907/51728/54982/5165/4166/5223/2719/11015/5351/2683/10165/1999/7167/5631/2806/1738/5230/10007/5318/1824/1365/205/3939/5836/5478/6382/54480/6391/79644/29926/8870/6383/9456/2805/4199/9435/3938/226/2729/22796/53836/3069/7162/4190/5214/5704/26355/4282/4191/3486/4351/6676/10164/10461/10776/5373/6647/1468/5768/2026/8460/2288/638/4233
HALLMARK_PROTEIN_SECRETION	HALLMARK_PROTEIN_SECRETION	95	0.388689	1.67204	0.0015641	0.00340021	0.000930583	3854	tags=36%, list=21%, signal=28%	4074/6197/3875/10040/5538/525/8546/1075/8773/9871/476/5594/2778/6845/10564/6643/1213/1173/22796/967/3382/1175/7163/372/3998/9183/9525/6647/10972/8082/3482/51606/8774/375
HALLMARK_APICAL_JUNCTION	HALLMARK_APICAL_JUNCTION	197	0.382383	1.80143	6.68518e-06	4.17824e-05	1.14352e-05	4146	tags=38%, list=23%, signal=29%	6464/2886/4627/3680/7283/81/87/7045/2037/91624/1364/4902/55742/1308/1739/9074/9353/2200/5818/5819/1265/2683/1366/1823/999/4313/4192/1001/92359/10487/81607/3386/8174/7082/5216/147/7414/1009/64398/7408/4628/6850/7781/4892/5880/140885/2318/7533/29126/3383/8935/7070/8754/5522/6376/5603/54509/10398/3688/10458/1432/2533/7087/57463/3914/5788/10205/8976/2962/942/4982/8745/5089/5291
HALLMARK_IL6_JAK_STAT3_SIGNALING	HALLMARK_IL6_JAK_STAT3_SIGNALING	85	0.380645	1.6175	0.00292142	0.00521682	0.00142776	7587	tags=65%, list=42%, signal=38%	578/3597/3460/23533/1438/3566/4055/27242/7040/3559/3676/23765/3572/1439/8809/5196/6772/83729/7132/9021/3554/3601/3594/8651/2/55540/3659/9180/6774/1230/1326/3162/2921/7124/3569/355/7097/1435/7133/10456/6354/929/3553/4283/1441/3581/10148/6373/960/3627/51330/3561/3953/5320/928
HALLMARK_ALLOGRAFT_REJECTION	HALLMARK_ALLOGRAFT_REJECTION	197	0.375036	1.76681	1.45364e-05	7.26821e-05	1.9892e-05	6666	tags=55%, list=37%, signal=35%	7453/2650/4528/4843/3111/8767/2000/5777/6347/729230/1984/4830/3460/958/3566/2113/1234/586/7040/3559/924/3603/920/5196/11222/5579/6772/4067/23166/3683/3383/7070/3937/16/7163/3105/3059/940/8669/5699/3594/896/8651/4869/6892/1520/3133/114548/926/2533/5582/3593/3109/5788/3560/942/973/4065/9655/1991/6891/602/8560/10333/4689/2069/3394/7186/1230/3702/11184/672/10006/567/7124/3569/972/3112/355/10261/9450/…
HALLMARK_UV_RESPONSE_UP	HALLMARK_UV_RESPONSE_UP	158	0.374901	1.72288	3.86011e-05	0.000137861	3.77304e-05	5325	tags=47%, list=29%, signal=33%	578/898/10105/1280/80777/5538/650/4487/682/9/262/5566/7301/10018/7389/4072/80273/10963/467/2643/3572/4128/226/5580/5702/1983/4067/3383/6817/6184/528/4885/2907/3301/6648/7277/8878/2237/360/1175/10125/5045/10280/2744/116138/896/8804/5873/2026/2288/6535/3659/1543/6697/760/885/4245/291/1515/7009/23467/3164/10439/5243/3134/3162/8817/54107/2920/3569/6415/6236/1212/51083
HALLMARK_IL2_STAT5_SIGNALING	HALLMARK_IL2_STAT5_SIGNALING	197	0.371228	1.74887	2.25836e-05	0.000102653	2.80944e-05	5710	tags=44%, list=31%, signal=31%	81848/6515/898/84230/126669/974/2184/64116/7074/3664/399/80324/4907/2118/2151/51429/650/7494/23075/5167/200734/2027/6403/5745/3566/191/6510/3177/990/28960/1522/27242/3559/4860/221143/8809/4641/8553/2983/130589/5621/5359/23710/83699/307/9446/5045/79026/115361/64332/896/8651/9308/3482/214/56990/4616/11230/760/7052/10875/3560/942/10970/10410/51284/8611/253558/3394/55509/5243/23208/9249/1326/10888/48…
HALLMARK_INTERFERON_GAMMA_RESPONSE	HALLMARK_INTERFERON_GAMMA_RESPONSE	198	0.363632	1.71226	2.47945e-05	0.000103311	2.82745e-05	7127	tags=59%, list=39%, signal=36%	7453/5321/7130/8767/7706/55024/9830/5777/6347/51056/958/8673/6403/10135/3566/10392/5690/715/5684/2643/3695/716/5743/4860/841/1439/10581/26524/163351/1240/6772/5214/29126/51015/7378/4061/3383/5359/9021/4261/6648/8737/3937/3434/3601/3105/5699/115361/4790/8651/6892/79132/55008/8082/3659/11274/10875/256586/3560/942/1026/84159/10410/129607/10797/3663/6774/64108/3394/116071/3433/87178/4599/4600/567/356…
HALLMARK_XENOBIOTIC_METABOLISM	HALLMARK_XENOBIOTIC_METABOLISM	197	0.363632	1.71309	4.72946e-05	0.000157649	4.3146e-05	5434	tags=47%, list=30%, signal=33%	26007/22949/1066/29785/2184/4836/3487/4121/8309/53/435/9060/64087/2159/191/6510/2114/54677/488/55748/6560/2937/8714/586/5627/2643/3251/4128/6999/2729/1969/10653/26061/5909/52/84913/3479/7132/957/7378/54884/3172/23710/3554/9446/9054/65018/2948/5699/10776/5950/4814/8460/4522/1562/5467/2099/1543/1571/760/383/9663/10611/10857/2192/8644/223/366/7009/645/50/316/2328/3394/3700/6580/60481/3290/27346/3162…
HALLMARK_COAGULATION	HALLMARK_COAGULATION	136	0.360621	1.62146	0.000757645	0.00177757	0.000486493	6792	tags=52%, list=37%, signal=33%	1848/5641/8309/2151/2200/9948/1513/7044/4313/2159/2811/1519/5341/715/11098/9615/1510/5624/5627/7056/716/5328/7980/5155/2157/5196/4314/5550/553115/6678/3172/8754/1508/344/5045/1512/2815/22921/2/4316/4048/7078/1191/842/1515/5055/23479/11202/1675/712/4317/5327/4323/6284/717/2158/735/629/1638/5028/7076/4224/3920/5654/341/4153/5879/2152/301/710/4973
HALLMARK_ANDROGEN_RESPONSE	HALLMARK_ANDROGEN_RESPONSE	99	0.35236	1.52545	0.00553925	0.00893427	0.00244517	5880	tags=48%, list=32%, signal=33%	23223/6197/87/3856/7113/8821/9510/2683/220/10627/3880/1718/9871/5867/658/2289/4117/51171/25816/8555/3248/4824/7163/3998/10461/595/896/2181/2185/22936/10611/84159/2547/10645/9455/8611/5036/60481/79689/3685/567/8848/4189/6675/2936/6652/56172/55839
HALLMARK_PI3K_AKT_MTOR_SIGNALING	HALLMARK_PI3K_AKT_MTOR_SIGNALING	104	0.345781	1.50422	0.00821458	0.0128353	0.00351281	2948	tags=31%, list=16%, signal=26%	7184/6197/7074/5499/4803/811/6195/79109/2872/27071/117145/10392/5216/5606/5594/29110/8822/7529/8569/1213/1173/5571/5579/7132/1845/8737/8878/84335/6513/5899/5601/5519
HALLMARK_UV_RESPONSE_DN	HALLMARK_UV_RESPONSE_DN	144	0.342858	1.55009	0.00277328	0.00513571	0.00140556	4252	tags=41%, list=23%, signal=32%	2650/4092/11030/10516/2697/8821/1739/7049/4088/1290/3037/1601/3397/10395/2202/7048/7082/6591/6256/3915/490/2274/6383/9975/8553/1281/4255/627/5195/861/594/3491/3382/1277/5999/307/2908/23266/3778/2064/120/4790/55109/1432/4363/5607/11343/5159/4233/4052/302/10611/273/5002/493/5581/26037/10486/1278
HALLMARK_ESTROGEN_RESPONSE_EARLY	HALLMARK_ESTROGEN_RESPONSE_EARLY	198	0.334723	1.57614	0.000440686	0.00123844	0.000338943	6012	tags=48%, list=33%, signal=33%	23223/3487/10105/7074/3856/58495/2697/3875/29984/27134/8645/9687/10514/3898/11001/26509/2296/367/80004/23596/2317/2683/1366/1999/79754/9060/7494/5029/10395/6542/6566/7739/6337/3880/4299/79083/8416/2274/11098/8204/51195/3572/2289/55686/7466/8553/7162/28966/22996/23541/6513/360/9145/6990/10125/91683/1997/1960/120/595/2288/55540/26353/55806/7052/9214/1717/3983/645/4681/9368/10439/60481/9249/25976/42…
HALLMARK_MYOGENESIS	HALLMARK_MYOGENESIS	198	0.334452	1.57486	0.00044584	0.00123844	0.000338943	6482	tags=49%, list=36%, signal=32%	4627/4638/58529/7170/7004/7140/7169/187/3693/4620/5664/2049/6764/2027/487/3316/1146/3270/4046/6444/624/7040/4151/4619/4842/351/2170/4641/9215/8553/25937/3679/1281/165/1306/3479/6678/5621/3486/1277/816/1284/1837/4205/5348/7433/3688/7138/4209/1012/8082/6535/26353/4618/4616/537/1191/6261/1026/2548/5837/3983/8877/5740/688/1134/1674/1728/8614/1675/844/58/79629/7164/7125/1346/7135/4303/1292/7139/5213/2…
HALLMARK_COMPLEMENT	HALLMARK_COMPLEMENT	197	0.332221	1.56511	0.000782132	0.00177757	0.000486493	5937	tags=48%, list=33%, signal=33%	5547/5321/3309/1848/5641/51056/9097/1378/23533/51734/7941/5294/1075/2159/2811/1519/5216/5341/715/1356/1380/1608/200316/9806/716/4199/1604/7980/5580/5155/2157/808/160851/5550/4067/55619/10019/1847/3172/5359/3684/1284/8754/3937/2793/1508/60489/10125/1514/1512/51440/2815/801/1012/1520/966/146547/3659/4048/760/1191/30818/308/1051/842/1509/1515/714/2155/5055/6047/11216/5646/255738/3988/2625/8942/3569/…
HALLMARK_ADIPOGENESIS	HALLMARK_ADIPOGENESIS	200	0.330387	1.56045	0.000490013	0.00128951	0.000352918	6685	tags=50%, list=37%, signal=32%	4638/2184/4836/10935/1737/2632/9131/334/8884/23344/2053/284/1738/10989/6239/25979/83871/6510/5236/1376/6391/29088/27069/80273/4199/2040/29103/226/1892/3679/1306/10113/5195/23786/7384/54884/4191/6817/64859/3419/1537/1629/7905/28512/25813/84895/83549/9908/6647/6776/1468/8404/9936/8082/26353/11343/56922/1666/7086/1717/29796/79071/400916/1349/50/4722/6623/6390/1351/5264/58472/7316/10313/5733/217/5517…
HALLMARK_TNFA_SIGNALING_VIA_NFKB	HALLMARK_TNFA_SIGNALING_VIA_NFKB	196	0.327417	1.53825	0.00221454	0.00442907	0.00121217	7168	tags=57%, list=39%, signal=35%	6515/7130/8767/9945/6347/4088/2683/650/3460/10135/80176/2114/490/5341/5606/8870/51561/467/2643/5743/5328/687/3572/25816/8553/79693/1847/3383/55332/9021/3491/6648/8878/3601/11080/1844/5791/3575/1960/5971/182/595/4790/6776/6385/9242/4814/9308/3593/3659/4616/3914/2669/10611/1026/1051/1959/8744/80149/5055/8877/3164/602/3552/7538/5806/330/25976/1326/3433/8942/2920/2921/7124/3569/23529/8848/941/4794/72…
HALLMARK_MYC_TARGETS_V1	HALLMARK_MYC_TARGETS_V1	199	0.327272	1.54449	0.000778613	0.00177757	0.000486493	6224	tags=40%, list=34%, signal=27%	2107/3326/5707/7458/5713/708/10935/23196/5245/9221/51491/7416/4830/2806/5230/3939/5478/3376/5250/5634/5690/7965/10921/9136/2739/7284/5901/7332/3251/6633/51020/6204/52/5704/11260/6634/5714/1537/10528/3329/26354/8669/6742/9377/23016/4869/28973/22948/1503/790/6741/4173/5709/2547/821/65005/5036/7555/4171/3837/10907/8894/54107/1964/3838/8662/7324/5685/5887/5902/56910/4174/4175/1019/55651/4706/10291/10…
HALLMARK_APOPTOSIS	HALLMARK_APOPTOSIS	160	0.322106	1.48165	0.00428805	0.00739319	0.0020234	6734	tags=52%, list=37%, signal=33%	2107/4092/3875/7049/5611/5538/650/5664/4060/4313/10134/5330/10018/2769/8870/633/467/2643/90427/841/6041/351/10017/4255/3000/54884/3301/6648/8878/599/4744/1960/2064/5058/595/6647/2026/5534/3482/3659/4616/5159/638/7078/1191/1026/842/1649/10410/150209/1540/2069/1676/3552/330/6574/672/3162/5747/7124/3569/5366/3669/355/5327/2936/8567/9890/56172/3606/2879/929/2232/3553/7076/837/6890/834/6303/2876/1491/…
HALLMARK_KRAS_SIGNALING_UP	HALLMARK_KRAS_SIGNALING_UP	195	0.29442	1.38387	0.0157079	0.0237999	0.00651364	5937	tags=42%, list=33%, signal=29%	83483/1848/639/25960/9945/2118/1794/650/79810/10253/4803/3783/220/1438/2113/2324/54677/5396/2995/5801/8854/5743/5328/2162/55107/2119/1240/79693/3936/5121/7102/3486/10457/23268/83734/4674/5284/6616/685/3575/5950/8404/1520/5473/9971/719/760/10205/383/4013/23643/81602/27299/8808/8431/22903/2069/3394/1363/7462/330/5243/11184/3290/9935/6324/23531/5593/3080/6447/5327/2207/3689/4214/7805/28959/3587/7139…
HALLMARK_KRAS_SIGNALING_DN	HALLMARK_KRAS_SIGNALING_DN	196	0.289156	1.35849	0.0303089	0.0420957	0.0115209	5092	tags=35%, list=28%, signal=25%	3352/7704/55315/2649/1280/55277/8471/5077/525/2811/1146/3851/7137/797/658/4908/57089/7781/5071/56154/55890/4842/55258/9435/2827/58157/5795/10686/3750/6754/11346/50489/54847/8823/9746/4868/56997/9127/3699/7021/4210/1838/23676/64137/3593/7068/2668/6261/23031/3779/5164/495/10913/6620/5055/5317/242/6262/10022/79085/778/54842/398/11202/26150/79696/8115/4599
HALLMARK_HYPOXIA	HALLMARK_HYPOXIA	200	0.27914	1.31841	0.0281215	0.0401735	0.0109949	5056	tags=38%, list=28%, signal=28%	2023/6515/4627/3309/8974/7045/5313/2632/2597/5165/2719/11015/7167/5228/1490/8991/5230/205/3939/2027/54206/2113/5236/1356/8987/8459/8870/633/8406/6383/2821/467/9435/3036/226/9215/5155/8553/3069/7162/5214/26355/4282/3486/3491/6513/3098/133/2908/7163/1837/230/6385/3423/2026/3340/7052/302/1026/56925/7360/2548/5837/1649/2131/5317/7538/1289/5105/25976/25824/6518/3162/2203/8614/4493
HALLMARK_HEDGEHOG_SIGNALING	HALLMARK_HEDGEHOG_SIGNALING	36	-0.373984	-1.53789	0.0200744	0.0295211	0.00807946	4015	tags=50%, list=22%, signal=39%	5921/8828/23493/7088/7090/23462/7436/9620/1808/8861/1400/1271/3897/7422/8851/9289/4983/6585

## Sheet: gsea_cerebellum_ZDHHC7
ID	Description	setSize	enrichmentScore	NES	pvalue	p.adjust	qvalues	rank	leading_edge	core_enrichment
HALLMARK_OXIDATIVE_PHOSPHORYLATION	HALLMARK_OXIDATIVE_PHOSPHORYLATION	200	0.562637	2.91189	1e-10	5e-09	3.57895e-09	4498	tags=62%, list=25%, signal=47%	64960/4700/4709/292/3052/9131/518/3420/4726/10063/5160/4695/1528/6389/9551/521/4710/4722/64963/1537/64981/4708/10939/6832/29796/4694/10476/6392/1327/6390/10632/4720/4552/8402/37/1351/1632/4702/529/7384/80273/56945/1349/54884/3032/4718/2879/4967/4696/4697/4707/23479/1340/30/211/5162/8802/65003/506/89941/522/5435/517/1329/3313/4712/4701/4190/4713/1892/4714/4723/3945/1345/7388/516/4717/7381/2271/929…
HALLMARK_REACTIVE_OXYGEN_SPECIES_PATHWAY	HALLMARK_REACTIVE_OXYGEN_SPECIES_PATHWAY	49	0.510709	2.04449	4.27709e-05	0.000267318	0.000191344	3931	tags=47%, list=22%, signal=37%	4700/5052/4710/5524/4720/6647/7001/2879/51022/10542/4155/3163/10587/2878/4482/112398/2745/9588/5621/26034/4257/2512/2936
HALLMARK_MYC_TARGETS_V2	HALLMARK_MYC_TARGETS_V2	58	0.443487	1.85149	0.000343368	0.00156076	0.00111718	8131	tags=76%, list=45%, signal=42%	10528/4839/54663/6832/80324/9238/10514/9064/81887/9136/5245/3177/64216/51491/92856/6949/5036/2193/7965/83743/51388/23082/1019/5347/4174/4869/79711/56915/9221/29078/23481/27346/56342/23160/51154/26354/10196/27340/79077/4173/3336/6652/10171/7374
HALLMARK_INTERFERON_ALPHA_RESPONSE	HALLMARK_INTERFERON_ALPHA_RESPONSE	96	0.423376	1.95312	1.70057e-05	0.000121469	8.69465e-05	7271	tags=67%, list=40%, signal=40%	51667/4061/51056/87178/81894/3659/55281/23070/64108/7726/79132/7453/3660/3429/1267/7706/684/55072/6773/3433/6737/3107/115361/961/9111/5720/3566/116071/834/3600/567/1435/5684/7318/5721/3430/972/8638/135112/27074/3437/3665/6890/55603/5696/64135/5698/91543/11054/3669/4938/10379/4599/94240/10161/64761/2634/5359/55601/54809/10581/219285/8519/55008
HALLMARK_DNA_REPAIR	HALLMARK_DNA_REPAIR	148	0.408141	2.02196	2.74715e-07	4.57858e-06	3.2773e-06	2919	tags=36%, list=16%, signal=30%	5432/6827/54487/9328/5437/4882/64976/10063/6895/1643/53343/2071/5440/11047/8086/8721/10302/5423/5438/2237/2962/57804/4799/10134/2965/2879/10623/2067/353/51082/6118/5435/6881/7508/6878/84265/30833/10309/7936/29901/6809/3251/100/2073/9978/6829/8178/4350/5439/2958/4833/51497/6834
HALLMARK_ADIPOGENESIS	HALLMARK_ADIPOGENESIS	200	0.395796	2.04842	2.81387e-08	7.03468e-07	5.03535e-07	4447	tags=41%, list=24%, signal=31%	4836/204/10113/369/9131/83549/10162/226/4722/1537/84522/29796/6390/5236/2053/55177/1351/25979/6888/6647/7384/84895/128338/7263/80273/1349/54884/2879/400916/8802/84173/2101/64225/4713/5860/1892/56922/137964/3419/57017/977/2878/539/10975/348/11343/5468/4706/1376/92840/23187/376497/334/2184/6817/51805/3421/23344/8694/149685/1337/27089/1738/34/50/27069/83871/6623/8884/604/10140/11176/4638/7086/901/21…
HALLMARK_UV_RESPONSE_UP	HALLMARK_UV_RESPONSE_UP	158	0.391317	1.95722	9.7278e-07	1.21598e-05	8.70382e-06	3990	tags=39%, list=22%, signal=30%	578/5702/10482/7389/5538/9129/5437/7301/9/898/4067/54107/226/5873/2237/7277/116138/10125/7263/80273/30/211/3659/6415/2288/51706/409/8878/5580/2026/896/1267/6697/6257/2011/5045/3306/10105/1181/1212/9296/10280/2878/5566/4245/6150/2907/10963/760/291/6817/8694/10038/360/1983/682/997/1280/3134/262/2744
HALLMARK_UNFOLDED_PROTEIN_RESPONSE	HALLMARK_UNFOLDED_PROTEIN_RESPONSE	112	0.369615	1.74769	0.0005158	0.00214917	0.00153835	4874	tags=39%, list=27%, signal=29%	8602/10775/10113/55272/10528/55062/30827/2521/5394/4848/51013/6734/468/55033/10897/3434/5073/27257/5393/6464/9136/3313/25804/1639/23404/64061/7466/55738/28972/54512/10525/1974/55153/23644/8815/9114/7494/1736/55466/1662/9652/9531/6897/8570
HALLMARK_MYC_TARGETS_V1	HALLMARK_MYC_TARGETS_V1	199	0.358573	1.84937	5.03772e-06	5.03772e-05	3.60595e-05	8121	tags=64%, list=45%, signal=36%	7458/6204/10528/10921/7555/23016/65005/51020/23196/54107/28973/5714/1537/5704/7332/10907/10574/708/4999/3068/7027/6627/9136/5245/10987/6633/8662/5425/8894/51491/3251/26121/6150/5478/4706/7284/5036/5230/1478/9377/5709/7307/4830/7965/1854/23435/57819/5688/6637/8664/5713/6427/1933/5682/5111/790/7203/10291/3376/6742/5902/7416/11260/1019/10935/3181/2091/3326/3939/5984/2806/6741/2547/10054/4174/4171/48…
HALLMARK_E2F_TARGETS	HALLMARK_E2F_TARGETS	200	0.353743	1.83078	9.30343e-06	7.75286e-05	5.54942e-05	8170	tags=68%, list=45%, signal=38%	6470/204/994/5889/10528/9924/898/6839/54556/10248/9238/84316/5426/64785/4999/5631/81611/6118/5425/1029/11113/7283/1786/8726/5036/6628/6119/6941/4830/5931/79075/6117/1854/23649/4172/10212/84844/11168/3159/6427/9125/1027/51747/5111/55646/8493/5902/9183/1019/55723/2547/7083/5347/4174/4171/5511/84296/1163/5424/4175/4292/8914/9212/1033/81624/4176/5983/3161/7398/4605/79677/6790/9221/332/55143/23594/104…
HALLMARK_FATTY_ACID_METABOLISM	HALLMARK_FATTY_ACID_METABOLISM	155	0.340866	1.70473	0.00021319	0.00106595	0.000762994	6210	tags=50%, list=34%, signal=33%	7389/3052/3420/84693/5160/9380/6389/226/6392/37/2027/1632/762/2639/54884/3032/874/10961/30/2819/5162/873/8802/4913/2026/210/4190/1892/364/51170/3155/2271/9588/5092/216/10005/549/11343/4282/1376/92840/760/3421/23710/26330/1738/34/1056/50/5720/3028/6584/8803/10455/1743/5465/2110/84532/8801/2752/58476/644/6611/223/3033/11185/51179/3939/3956/35/29781/2052/60481/1371/4056/2954/387893
HALLMARK_MYOGENESIS	HALLMARK_MYOGENESIS	198	0.293149	1.51483	0.00254206	0.00977715	0.00699838	4114	tags=32%, list=23%, signal=25%	11155/9144/2314/573/7169/2065/5224/2027/7433/208/10174/5816/5091/8497/4641/4627/1152/487/7125/4303/844/3316/6764/859/6261/5837/4621/7004/79629/6300/1191/816/1346/3983/1410/5348/1339/4209/2878/6442/5621/25970/624/845/1160/347/26287/5213/1146/7249/1974/23654/4634/58/6450/25803/1837/5664/8877/537/4638/23604/274
HALLMARK_GLYCOLYSIS	HALLMARK_GLYCOLYSIS	200	0.279141	1.44468	0.00881765	0.0314916	0.0225414	3721	tags=28%, list=20%, signal=22%	51728/5315/22796/7167/56052/2683/22976/29926/2997/54982/5256/64132/2990/10456/1528/1999/226/4731/5704/5224/6888/6647/5091/8497/9080/64077/2805/2288/5223/10616/26229/5631/2026/4190/5318/55139/26355/2745/7264/4282/5478/4351/5230/1365/140838/26330/3948/2542/1738/4166/5768/6383/7360/3425/79644
HALLMARK_MTORC1_SIGNALING	HALLMARK_MTORC1_SIGNALING	199	0.271958	1.40264	0.0126507	0.042169	0.0301841	2825	tags=22%, list=16%, signal=19%	4836/5052/5701/7167/23062/9368/6472/2286/10452/10061/4048/226/81873/4074/4793/5236/5704/27101/23753/7277/2232/2965/29110/2805/8878/8624/9136/3313/2597/5860/1649/7453/10987/5464/516/8894/7283/5199/3251/2745/5478/2821/10963/5230
HALLMARK_INTERFERON_GAMMA_RESPONSE	HALLMARK_INTERFERON_GAMMA_RESPONSE	198	0.271568	1.40331	0.015616	0.0487999	0.0349305	6346	tags=44%, list=35%, signal=29%	4790/5771/8737/4061/3695/51056/87178/55024/81894/3434/3659/10616/23070/256586/3394/64108/7726/79132/5777/7453/958/3660/3429/8743/7706/684/55072/8651/6773/3433/6737/115361/6892/6375/3105/54739/3106/9111/8673/4261/9961/5720/81030/7378/3566/29126/10875/116071/7130/6772/10791/834/3600/57823/567/5684/5721/3430/972/4600/8638/694/3560/4860/837/3437/3665/4283/10392/6890/3108/4939/5699/5696/2841/26524/641…
HALLMARK_HEDGEHOG_SIGNALING	HALLMARK_HEDGEHOG_SIGNALING	36	-0.532302	-2.10724	8.85256e-05	0.000491809	0.000352032	3936	tags=53%, list=22%, signal=41%	8861/4763/3897/23462/7088/5921/6252/6585/8633/7422/7857/8829/9289/1808/4897/8828/4983/1400/8851

## Sheet: gsea_heart_ZDHHC7
ID	Description	setSize	enrichmentScore	NES	pvalue	p.adjust	qvalues	rank	leading_edge	core_enrichment
HALLMARK_MYOGENESIS	HALLMARK_MYOGENESIS	198	0.454092	2.35399	1e-10	1.66667e-09	1.01754e-09	4148	tags=42%, list=23%, signal=33%	115/2314/3983/8736/4625/4641/22808/4209/9215/1384/1140/3757/6535/88/11155/6840/9659/4607/10014/10580/4303/816/23175/7139/5837/3270/1760/4684/1284/6525/1674/203/2027/7169/1489/5348/208/25803/6764/25970/3693/4622/3679/844/1158/8497/7004/11156/9144/4616/89797/6442/4620/7135/537/26287/7249/7164/4627/1756/5213/70/3801/4634/22924/10174/2180/9463/3908/6709/1160/8557/1837/23654/1410/573/8614/859/22933/68…
HALLMARK_OXIDATIVE_PHOSPHORYLATION	HALLMARK_OXIDATIVE_PHOSPHORYLATION	200	0.442045	2.29871	1e-10	1.66667e-09	1.01754e-09	5875	tags=53%, list=33%, signal=36%	2821/1743/6832/1374/1431/9927/4967/23203/1352/10939/593/50/8604/6389/3030/1727/5160/23530/10989/3313/37/2110/4129/3419/4723/7416/481/4191/3418/2806/4720/3421/80273/3052/211/1355/9131/8402/4719/537/1891/1737/2271/7384/9868/513/4976/92609/788/10449/89941/293/374291/4726/3420/292/10128/22/3032/30/4696/4728/10651/4835/26517/498/5447/506/10063/291/11331/51318/29088/51606/6183/8050/2109/1537/5018/1892/…
HALLMARK_MYC_TARGETS_V2	HALLMARK_MYC_TARGETS_V2	58	0.438894	1.8435	0.00056717	0.00257805	0.00157397	4369	tags=43%, list=24%, signal=33%	6832/9238/2193/83743/23223/5245/3177/6949/7965/92856/54663/23082/7374/51491/4839/9136/5036/705/56915/9064/5347/23481/4173/9221/10514
HALLMARK_MITOTIC_SPINDLE	HALLMARK_MITOTIC_SPINDLE	197	0.42742	2.21063	3.50055e-10	4.37568e-09	2.67147e-09	5288	tags=49%, list=29%, signal=35%	54509/29/55201/7414/7430/79658/23332/9181/1453/11346/140735/10844/10928/127829/57787/25777/55755/50628/667/4983/1778/8440/4926/9826/10435/7248/8470/11214/23022/201176/22930/22994/6711/396/29901/4643/5048/832/57679/9564/55125/9793/4627/4650/10163/8243/5108/89941/7461/5116/23095/23637/6790/6904/10128/23192/10801/6709/11190/25/81/699/85464/22920/1063/9344/3996/5347/57580/54443/3619/7531/613/2017/101…
HALLMARK_ADIPOGENESIS	HALLMARK_ADIPOGENESIS	200	0.285114	1.48264	0.00514538	0.0197899	0.0120823	3688	tags=27%, list=21%, signal=22%	23786/1431/4836/137964/1384/56894/593/112/79602/10580/1376/369/226/5195/84895/50/5236/376497/51/57017/35/10989/3679/2101/10113/25813/3419/10162/4191/7532/3421/80273/415116/9131/83549/2632/11176/1891/1737/977/7384/8694/10449/23187/334/284119/123/10400/11194/7423/6817/400916/6239/604
HALLMARK_ESTROGEN_RESPONSE_EARLY	HALLMARK_ESTROGEN_RESPONSE_EARLY	198	0.267554	1.38699	0.0119502	0.0398339	0.0243197	2376	tags=21%, list=13%, signal=18%	115/3983/7052/124583/79875/6840/9862/3705/9612/21/2289/6196/8165/84187/10105/7739/26018/6509/2288/1154/55793/3480/22996/81875/9846/23223/6566/23030/11057/221/9620/25987/5029/1960/8800/399665/89797/267/26509/29984/79083
HALLMARK_COMPLEMENT	HALLMARK_COMPLEMENT	197	-0.30239	-1.63865	0.000232128	0.00116064	0.000708603	4534	tags=37%, list=25%, signal=28%	8851/4057/2155/5646/23764/3932/2207/9097/10125/5265/5251/255738/3172/2773/2147/55619/5340/1075/2764/308/4973/2153/10404/3697/1356/843/1378/462/164656/4199/7128/341/7941/4317/4322/7980/834/9958/3001/5547/725/1520/760/5327/25801/337/1512/7076/54331/5321/8942/6280/735/3937/7454/2159/838/1803/837/1519/3075/4067/283/3988/2793/5359/629/9732/717/3003/1848/1191/4179
HALLMARK_INFLAMMATORY_RESPONSE	HALLMARK_INFLAMMATORY_RESPONSE	199	-0.304869	-1.6525	0.000167232	0.000929068	0.00056722	5616	tags=43%, list=31%, signal=30%	490/5791/166929/3386/10006/929/4210/64108/8685/5329/8743/6401/5996/969/5739/6367/4283/92/3587/10242/3604/7098/3932/5724/3696/10125/3600/187/5027/4233/2773/8767/3460/2357/9034/6542/4973/6373/3593/3269/6372/4084/4224/2719/1441/196/3976/1536/10203/8877/9435/6364/23166/133/7076/2867/19/3576/1902/9153/3937/2769/1906/5732/2015/6869/64127/4067/6717/7096/3566/7130/2643/10663/9111/1880/3554/3606/3552/623/…
HALLMARK_INTERFERON_GAMMA_RESPONSE	HALLMARK_INTERFERON_GAMMA_RESPONSE	198	-0.311981	-1.69317	3.53244e-05	0.000252317	0.000154046	6336	tags=46%, list=35%, signal=30%	716/23424/3569/3108/9021/3620/10410/972/163351/25939/5743/5292/10068/3135/54625/710/115361/4860/64108/3695/8743/5699/969/9934/3106/51735/2841/4283/3669/5696/3587/3663/80830/6398/9246/5684/4261/55601/3600/55024/669/8767/3117/2357/9830/4615/22914/6373/55016/10791/84159/23586/57823/7128/834/7903/10875/3001/5777/219285/4502/2209/567/5321/3431/6403/8869/3937/8651/3574/837/694/3394/3075/6717/5359/629/3…
HALLMARK_XENOBIOTIC_METABOLISM	HALLMARK_XENOBIOTIC_METABOLISM	197	-0.318182	-1.72423	4.48586e-05	0.000280366	0.000171171	3894	tags=39%, list=22%, signal=31%	5091/866/316/3172/10728/1244/2028/5340/9060/2192/3487/7448/3484/3294/7358/2646/8529/6999/2168/131/2937/1593/1644/3273/1728/1646/3697/27329/2160/8460/5950/383/1401/3700/2114/3290/7274/2571/52/1544/29785/7498/3251/6898/760/4502/26998/8942/6533/28959/1562/6370/6580/4153/5805/348/2159/2203/51380/3394/4121/1571/629/355/116285/839/1592/2643/54677/3398/115817/60481/2729/3554/10857/2326/1036
HALLMARK_IL6_JAK_STAT3_SIGNALING	HALLMARK_IL6_JAK_STAT3_SIGNALING	87	-0.333564	-1.56814	0.00513661	0.0197899	0.0120823	3401	tags=31%, list=19%, signal=25%	3460/7850/4615/6373/1441/1271/3588/5320/3561/3572/3597/8651/960/928/3574/1326/4050/55540/10563/355/1439/3566/1438/5771/3554/3563/7097
HALLMARK_KRAS_SIGNALING_UP	HALLMARK_KRAS_SIGNALING_UP	196	-0.395458	-2.13739	2.87403e-09	2.87403e-08	1.75467e-08	5239	tags=56%, list=29%, signal=40%	2517/6696/3689/3800/5936/3673/5743/55107/10806/4013/10103/25907/101/7462/5329/4318/2556/27075/22903/30001/951/51311/11179/8404/5178/5284/29106/5696/80380/3587/5649/2118/2324/8854/6616/2207/7813/669/80201/3481/9971/2162/26499/5243/219333/8808/9949/2048/84869/6447/58155/685/4319/12/5950/383/10320/27344/7851/3976/83734/220/2012/3080/7128/3290/6364/1149/5801/83483/7035/2113/1520/760/5327/11184/50856/…
HALLMARK_PANCREAS_BETA_CELLS	HALLMARK_PANCREAS_BETA_CELLS	39	-0.412759	-1.62954	0.00773217	0.0276149	0.0168596	7145	tags=69%, list=40%, signal=42%	5078/5122/58477/5080/10000/26610/3651/28972/5126/6750/5063/6927/4825/3170/3670/2641/5313/6514/3642/1113/1641/50674/1803/23478/6726/57818/4005
HALLMARK_ALLOGRAFT_REJECTION	HALLMARK_ALLOGRAFT_REJECTION	197	-0.423131	-2.29295	1e-10	1.66667e-09	1.01754e-09	6305	tags=60%, list=35%, signal=40%	973/3569/4869/3108/7535/3689/6688/7042/2634/972/3135/2589/3459/961/10006/6891/3848/4318/5699/8915/8444/4689/2213/6367/916/3625/2268/3133/4830/4283/92/586/7098/926/3932/6170/3683/1230/3589/3109/3600/924/3558/8767/2147/3117/3460/7070/7321/11146/3059/3593/6059/915/2000/3122/3112/10333/4690/6189/914/3976/729230/5199/1234/7903/6357/23166/43/3001/3702/5777/5552/940/4065/3551/3111/2113/1520/11184/567/70…
HALLMARK_COAGULATION	HALLMARK_COAGULATION	136	-0.426638	-2.16997	1.66777e-08	1.38981e-07	8.48513e-08	5926	tags=57%, list=33%, signal=39%	1510/4313/4314/1465/3249/710/5341/4318/2157/5879/6284/8754/726/2/4316/1311/5627/9615/23764/11202/5265/3172/1369/2147/649/731/10747/5340/8858/7018/2161/1361/6678/335/4973/3273/5624/10404/3697/2266/2243/2160/4224/4319/462/2165/344/164656/4485/7056/341/4317/7980/732/11098/1513/5327/1512/7076/4312/4153/735/2159/1803/928/1519/345/3075/283/629/717/378/2158/3426/1848/1191/1638/301

## Sheet: gsea_kidney_ZDHHC7
ID	Description	setSize	enrichmentScore	NES	pvalue	p.adjust	qvalues	rank	leading_edge	core_enrichment
HALLMARK_OXIDATIVE_PHOSPHORYLATION	HALLMARK_OXIDATIVE_PHOSPHORYLATION	200	0.573179	2.95978	1e-10	5e-10	1.36842e-10	5703	tags=76%, list=32%, signal=52%	37/1340/3420/10312/537/1727/4710/3421/9927/1327/4191/27429/6389/1537/9296/4702/521/2821/5160/5435/7388/211/8402/3418/4696/527/506/516/9551/292/7384/291/10939/4722/1891/26519/517/1337/10063/4723/10632/3028/29796/293/4694/3030/4259/6834/4714/4720/10476/4713/7381/840/1351/4700/51660/1528/1743/4697/10975/64963/1347/4708/2806/539/498/4726/6183/1632/89941/1349/1350/26521/4728/6390/27089/4695/533/2879/2…
HALLMARK_REACTIVE_OXYGEN_SPECIES_PATHWAY	HALLMARK_REACTIVE_OXYGEN_SPECIES_PATHWAY	49	0.555075	2.25394	9.21563e-07	2.5599e-06	7.00603e-07	4997	tags=57%, list=28%, signal=41%	4710/5524/2242/5214/4046/3726/847/4155/4720/4700/7001/3163/10587/2879/5052/6647/22904/55829/9124/9588/5621/2745/475/1728/10494/1032/2512/6648
HALLMARK_INTERFERON_ALPHA_RESPONSE	HALLMARK_INTERFERON_ALPHA_RESPONSE	96	0.539352	2.45483	1e-10	5e-10	1.36842e-10	4561	tags=58%, list=25%, signal=44%	10410/1267/5720/1435/5721/9246/10581/2634/11054/2766/7318/81894/3959/5696/972/6737/3669/5698/3566/3659/10437/9034/55281/64761/7726/6890/3660/55008/3665/7453/64108/116071/79132/115361/716/3627/3430/834/3431/11274/3107/567/3429/23424/9111/4061/93343/8519/3433/3437/51667/219285/3600/64135/51056/10544
HALLMARK_INTERFERON_GAMMA_RESPONSE	HALLMARK_INTERFERON_GAMMA_RESPONSE	198	0.501321	2.58493	1e-10	5e-10	1.36842e-10	5209	tags=60%, list=29%, signal=43%	5777/6774/6403/5743/10410/5720/710/5321/5721/9246/5371/6347/10581/3601/3108/5699/11054/3937/4792/5214/837/81894/3959/4283/3663/5696/972/6737/6375/57169/10616/715/3669/4860/5698/10791/8673/6892/57823/7378/958/3566/3659/10437/840/3135/7127/64761/7726/6890/1026/3660/3106/55008/3665/7453/84166/64108/3394/116071/79132/629/115361/3001/3695/4790/3105/716/3627/4261/3430/5292/669/22914/834/3431/3383/10392…
HALLMARK_TNFA_SIGNALING_VIA_NFKB	HALLMARK_TNFA_SIGNALING_VIA_NFKB	197	0.471399	2.42345	1e-10	5e-10	1.36842e-10	5832	tags=59%, list=32%, signal=41%	10318/9322/4791/5970/7538/8878/5743/2114/4814/5606/1844/1435/5209/5328/6347/3601/604/9516/4616/4794/79155/1942/4792/23529/2669/23308/3914/3726/1906/3491/5187/8553/50486/6303/23645/3659/9034/602/6776/7127/6890/1026/8870/8061/23764/1843/2355/10209/1051/7422/5054/4790/9308/3627/388/7262/1839/80149/51561/2683/3383/6385/11182/1052/3460/687/3976/7071/5971/3433/1827/330/2152/150094/694/7832/3280/9592/37…
HALLMARK_HYPOXIA	HALLMARK_HYPOXIA	200	0.463764	2.39478	1e-10	5e-10	1.36842e-10	5701	tags=56%, list=32%, signal=39%	633/226/6275/2023/3098/7538/3073/284119/7167/4627/2548/124872/5209/5211/6820/10994/5155/9957/1942/5214/2821/5224/5236/25824/26355/8991/3491/5230/8553/2632/3669/112464/2997/230/23645/2597/10397/3069/2239/1026/7052/8870/857/1649/8459/58528/23764/1843/2355/4282/6533/7422/5054/272/133/5292/123/54206/51129/10891/6513/1907/5228/3939/1356/6385/2026/54541/6478/23210/302/8839/55139/4601/2152/694/2651/3725…
HALLMARK_IL6_JAK_STAT3_SIGNALING	HALLMARK_IL6_JAK_STAT3_SIGNALING	87	0.455244	2.06453	3.54489e-06	7.38519e-06	2.02121e-06	3821	tags=37%, list=21%, signal=29%	4055/7133/10456/6774/3588/1435/91/928/51330/27242/7040/3601/2/3561/4283/7850/578/7132/3566/94/3659/9180/4050/23765/3563/3627/5292/3594/7297/3460/3559/8651
HALLMARK_ADIPOGENESIS	HALLMARK_ADIPOGENESIS	200	0.439101	2.26743	1e-10	5e-10	1.36842e-10	5601	tags=56%, list=31%, signal=39%	226/55177/369/415116/7351/284119/80760/3421/5209/5211/4191/6888/83549/604/334/1537/8694/7316/7423/977/5236/5168/23786/11343/5468/25979/7384/4722/1891/1337/847/2632/29796/84895/4259/5195/2040/4713/57017/6776/1351/204/10162/10975/51635/10400/539/56922/1349/10140/6390/27089/2879/400916/2101/10113/483/1652/376497/2053/6647/80273/5733/50/4023/23187/123/51129/10989/54884/3952/84522/149685/4638/1384/290…
HALLMARK_MYOGENESIS	HALLMARK_MYOGENESIS	198	0.436245	2.24938	1e-10	5e-10	1.36842e-10	5164	tags=47%, list=29%, signal=34%	351/1191/1140/624/573/9144/3801/3691/10174/2314/6876/1489/2934/537/22933/4627/2548/1346/165/7040/7164/6649/4641/4616/26287/6535/1410/5224/4209/115/3693/1152/4046/6764/23654/3490/25970/1675/8553/1158/347/4629/10014/1012/9463/58529/1026/3316/6525/2180/208/22808/6442/5213/5348/7134/845/79629/1839/4638/8912/1384/23604/6450/7433/3679/5664/9659/140465/26353/1284/11156/11345/5621/22924/2170/5816/859/172…
HALLMARK_P53_PATHWAY	HALLMARK_P53_PATHWAY	198	0.435457	2.24532	1e-10	5e-10	1.36842e-10	5452	tags=59%, list=30%, signal=41%	351/975/3006/6275/6236/26471/6281/3691/4814/26999/4071/55766/3732/7867/63874/91/64787/64065/56997/7040/6768/29946/7164/1969/79651/3265/57799/3714/2517/23654/26355/2872/4013/5564/23303/5372/578/6141/8673/6382/6303/23612/8722/7378/23645/57761/10397/2040/10437/3275/1012/10904/2810/6890/1026/8870/1649/2052/10458/10140/25873/9618/6004/6256/10608/1509/1606/1839/10399/9538/54884/3945/6520/834/3872/5154/…
HALLMARK_COAGULATION	HALLMARK_COAGULATION	136	0.428666	2.08232	1.08305e-07	3.18544e-07	8.71804e-08	4234	tags=35%, list=23%, signal=27%	553115/1191/9948/5045/1397/6284/2934/22933/710/928/5328/2783/5155/2/7078/1465/1675/715/10404/2160/824/1519/4316/5327/283/10411/733/23764/842/629/1512/11098/5054/716/5265/3249/6271/4485/726/7076/3158/3273/2152/712/23479/1311/4312/4319
HALLMARK_ALLOGRAFT_REJECTION	HALLMARK_ALLOGRAFT_REJECTION	197	0.418971	2.15391	1.39475e-09	5.81145e-09	1.5905e-09	4797	tags=50%, list=27%, signal=37%	6356/5777/822/1435/3111/3458/5552/7040/2268/6347/2634/3108/5699/7070/3937/3561/16/916/926/9466/914/925/1520/23308/3551/27240/3059/4283/972/207/3592/919/915/920/3702/6203/6892/2833/3122/958/3566/3133/3932/602/3135/6890/6363/3683/3689/5551/4050/3665/7453/7535/3394/3001/3105/973/917/7098/4065/56253/1234/7454/7186/3594/322/3383/6688/959/567/2213/4689/3460/7076/3559/3976/23166/8651/6891/1984/3002/6223…
HALLMARK_XENOBIOTIC_METABOLISM	HALLMARK_XENOBIOTIC_METABOLISM	197	0.406711	2.09089	7.94112e-09	2.83611e-08	7.762e-09	6378	tags=57%, list=35%, signal=37%	1312/3728/384/9536/84913/2114/4814/26999/10653/57447/5909/6539/1725/65018/1969/5699/3294/211/645/1066/3290/55748/5467/1891/5372/873/847/6560/7132/2160/7378/23710/1646/8460/29950/1528/51635/2052/10400/9564/2948/3394/629/6533/5054/53/1652/116842/50/3487/3931/54884/7009/9663/4128/866/2110/4836/9361/1593/9446/2571/435/3273/2328/2651/8714/22949/5447/4502/115817/1728/3735/10237/7498/5166/2099/6510/6408…
HALLMARK_INFLAMMATORY_RESPONSE	HALLMARK_INFLAMMATORY_RESPONSE	199	0.397733	2.05058	1.77995e-08	5.93318e-08	1.62382e-08	4823	tags=43%, list=27%, signal=32%	391/7133/5970/10507/3732/5029/1435/91/6376/6347/3601/3937/3656/623/4792/23308/1906/4283/6401/11047/6892/5025/5739/8578/958/3566/3659/3932/9034/10316/962/1026/60675/10663/9180/3665/64108/5054/4790/3627/7098/6004/133/55829/1839/255488/3249/64127/3576/2014/3383/6541/29933/6324/9111/4061/2769/2015/3460/5817/7076/3976/23166/8519/4210/8743/6504/2152/7832/6717/2069/3560/728/3600/3569/10135/969/8807/3604…
HALLMARK_FATTY_ACID_METABOLISM	HALLMARK_FATTY_ACID_METABOLISM	155	0.390804	1.95192	2.03983e-06	5.09957e-06	1.39567e-06	6044	tags=54%, list=34%, signal=36%	37/226/6281/10961/3420/5720/3421/9246/4191/6389/8639/644/5160/11343/2752/874/51703/1891/50486/873/3028/23710/10005/58476/1743/2052/7389/1632/2180/1374/4282/5465/364/84532/5092/50/54884/3939/2026/23417/4128/259307/3295/4913/1384/549/6391/2110/3956/3158/3032/216/11185/9588/33/6611/35/84693/3155/9380/1666/2027/4190/10455/29781/760/5162/1056/50814/10449/8801/79602/51109/1892/728294/30/6999/2271/210/1…
HALLMARK_ESTROGEN_RESPONSE_EARLY	HALLMARK_ESTROGEN_RESPONSE_EARLY	198	0.390155	2.01173	4.95207e-08	1.54752e-07	4.23533e-08	5528	tags=51%, list=31%, signal=36%	360/4681/573/9536/23254/1366/29984/23541/5029/399665/267/27134/3875/2317/3705/6820/7164/80004/23286/55191/64284/22996/54020/9145/645/115/7031/8140/7033/58495/79083/9214/64798/4582/8553/8165/60598/9249/7466/3898/10439/26509/2717/10160/55793/6337/3856/84187/2810/3880/7052/6196/55806/29107/10140/1999/79875/11098/1952/1154/10105/3487/6513/2288/2683/6478/8839/7494/64699/2274/7071/5914/26353/3280/7022/…
HALLMARK_APOPTOSIS	HALLMARK_APOPTOSIS	160	0.385797	1.93547	2.42492e-06	5.60438e-06	1.53383e-06	5002	tags=48%, list=28%, signal=35%	351/633/1611/5526/1191/5970/8878/10410/2934/2064/3875/51330/4000/10134/4255/4616/837/599/7078/914/3669/8682/706/6303/598/56172/3659/840/6890/1026/8870/857/1649/5327/5551/89941/2876/3489/2879/842/388/6647/2012/54884/834/2026/4092/2769/7076/5664/3000/8743/330/5914/8567/3482/7832/3005/3725/2069/3958/3569/1960/581/10682/969/1647/4739/10017/929/3315/841/5159/7124/6648/467
HALLMARK_APICAL_SURFACE	HALLMARK_APICAL_SURFACE	44	0.384664	1.52521	0.0218567	0.0303565	0.00830809	5304	tags=43%, list=29%, signal=31%	351/2319/2947/6376/7070/3561/4118/27076/84632/51754/2683/6517/5314/3560/11126/3315/50617/2050/79602
HALLMARK_APICAL_JUNCTION	HALLMARK_APICAL_JUNCTION	197	0.37379	1.92164	1.0051e-06	2.64501e-06	7.23897e-07	4118	tags=36%, list=23%, signal=28%	6810/7408/2886/3728/947/7087/149461/4478/6237/3691/1366/23562/10174/3384/3918/4627/1364/6376/51148/26119/81/7070/8751/10398/6714/24146/92359/3265/7106/999/3914/65266/5603/8449/7410/2771/5097/5216/54509/10109/4982/10458/51754/2962/103910/4771/208/5880/10487/140885/6850/51474/1495/2683/3383/143903/9080/7122/147/4902/1384/5871/81607/10205/6251/5819/7791/3675/87/5600
HALLMARK_BILE_ACID_METABOLISM	HALLMARK_BILE_ACID_METABOLISM	112	0.36995	1.72948	0.000343449	0.000613301	0.000167851	3822	tags=34%, list=21%, signal=27%	347734/24/654/6820/25824/3418/10998/80270/9409/51703/847/8412/6579/10133/20/3932/55825/373156/5824/9971/2180/64241/9023/2053/6256/8431/5213/6647/2030/5190/54884/23417/3295/866/196743/4306/216/1593
HALLMARK_IL2_STAT5_SIGNALING	HALLMARK_IL2_STAT5_SIGNALING	198	0.366432	1.88941	2.46593e-06	5.60438e-06	1.53383e-06	5819	tags=50%, list=32%, signal=34%	975/7133/28960/10538/1522/5045/822/6403/9144/10410/974/1435/80760/6484/27242/5583/4641/4616/9261/5269/6050/1893/51429/8530/4582/7850/8553/9249/4860/3177/5025/10397/598/3566/23710/7293/8611/962/7052/8320/3664/4050/58528/8835/23764/3394/79026/2879/115361/3563/29851/9308/3627/388/6004/1154/1291/2012/5292/123/6271/79971/7494/3559/3976/8651/9446/1493/8743/3482/5339/3560/55509/5621/2027/4783/896/3604/4…
HALLMARK_ESTROGEN_RESPONSE_LATE	HALLMARK_ESTROGEN_RESPONSE_LATE	199	0.361987	1.86629	2.94768e-06	6.408e-06	1.75377e-06	5618	tags=51%, list=31%, signal=36%	4681/10538/573/5777/9536/7538/399665/1844/3918/2852/928/267/27134/64065/2317/3705/6768/6820/7164/51599/645/3418/1152/7177/7031/999/8140/7033/58495/5603/3669/7466/10439/26509/2717/10160/3993/6337/2810/3880/6196/857/55806/10497/29107/10140/10610/5364/11098/1952/3613/1154/2030/2582/4057/11187/5733/7264/7134/64215/10105/5265/3487/1345/2288/2261/4338/57834/6478/2109/8839/7494/64699/3158/26353/7022/466…
HALLMARK_UV_RESPONSE_UP	HALLMARK_UV_RESPONSE_UP	158	0.360677	1.80481	2.17284e-05	4.34567e-05	1.18934e-05	5183	tags=46%, list=29%, signal=33%	360/226/6236/5045/8878/1267/116138/3306/4245/6539/5437/1175/6535/4792/8694/9296/2011/7277/6415/6184/2907/211/51706/3726/3485/682/291/8692/578/1212/10439/3659/6890/2052/7389/4072/10482/388/6150/1181/80273/5702/6697/10105/3134/6257/11333/2288/7009/3383/5334/2026/5580/4128/10948/6817/694/7832/3569/885/80777/3164/10494/896/10652/10125/760/6648/5243/467/1028/8804/2353
HALLMARK_CHOLESTEROL_HOMEOSTASIS	HALLMARK_CHOLESTEROL_HOMEOSTASIS	73	0.344195	1.5127	0.0137977	0.0209056	0.00572154	5741	tags=51%, list=32%, signal=35%	6282/1191/6811/928/51330/58191/4598/2990/5468/308/26270/1891/230/57761/22809/20/10654/23474/4023/54206/5833/114569/7108/3958/1595/10682/6721/55902/4783/2946/50814/467/4597/10957/2224/132864/5359
HALLMARK_COMPLEMENT	HALLMARK_COMPLEMENT	197	0.339563	1.74568	8.64422e-05	0.000160078	4.38109e-05	6029	tags=50%, list=33%, signal=33%	6810/1191/30818/391/4855/146547/6284/843/710/5321/2793/2783/5155/3937/837/6714/1514/9986/1465/1520/3003/308/715/10404/2771/5698/5216/3659/966/3932/1012/840/1519/3660/5327/283/3665/23764/842/629/838/1512/3001/1051/5054/716/51548/1509/1368/4057/5292/5265/7454/834/1356/60489/5580/959/7076/2152/3002/1284/712/3309/3958/5531/6047/3569/7128/475/51056/2219/3818/1847/10938/10125/760/91133/3684/1604/714/97…
HALLMARK_PI3K_AKT_MTOR_SIGNALING	HALLMARK_PI3K_AKT_MTOR_SIGNALING	103	0.338515	1.5664	0.00516329	0.00860548	0.00235518	3613	tags=35%, list=20%, signal=28%	1173/375/8878/5606/81617/3561/1460/3265/6195/10298/1845/2872/207/811/84335/396/7132/4793/5216/51295/57761/3932/2810/9630/156/1026/8569/1649/4803/5571/79109/7186/6513/10392/5300/5499
HALLMARK_GLYCOLYSIS	HALLMARK_GLYCOLYSIS	200	0.335123	1.73051	4.024e-05	7.73846e-05	2.11789e-05	5028	tags=43%, list=28%, signal=31%	5315/5768/226/2023/10456/7167/4191/6888/29926/10331/79586/5214/8996/5224/2990/26229/26355/9514/7033/11285/5230/10616/2805/3669/6382/2997/64132/3069/8460/6676/2239/1528/5704/8870/2806/5351/283/58528/5834/1999/4282/7422/9123/55501/6647/112399/2582/4351/7264/51129/2288/2683/3939/64077/726/2026/9080/54541/56052/2585/8704/8912/3425/53836/6391/55139/4601/25796/3309/30001/2745/10020/1365/9048/7436/11015…
HALLMARK_PEROXISOME	HALLMARK_PEROXISOME	104	0.316103	1.4649	0.0152236	0.0223877	0.00612716	3890	tags=34%, list=22%, signal=27%	347734/60386/6820/51024/3265/25824/3418/80270/9270/291/51703/1891/847/9249/2067/706/5195/10005/373156/2055/2180/23457/2053/5052/6647/5190/54884/7367/23417/3295/866/1384/5830/216/9961
HALLMARK_DNA_REPAIR	HALLMARK_DNA_REPAIR	148	0.297139	1.46263	0.00801702	0.0129307	0.00353892	3214	tags=31%, list=18%, signal=26%	8721/5437/10134/8178/5439/84265/2987/4059/5435/7936/5148/51292/5438/64976/155382/3059/79720/6881/11047/6827/10063/6829/51160/2067/4860/6834/5434/25920/7251/9013/353/27343/57804/2962/2879/5432/30833/4350/3704/30834/56655/55290/1603/7084/6878/8086
HALLMARK_EPITHELIAL_MESENCHYMAL_TRANSITION	HALLMARK_EPITHELIAL_MESENCHYMAL_TRANSITION	199	0.280265	1.44496	0.0087182	0.0136222	0.00372818	4285	tags=28%, list=24%, signal=21%	633/5768/822/10516/6876/3918/5479/51330/7040/4616/7070/6535/10398/1893/7078/3693/2517/2669/3485/3491/6382/6303/966/8985/7052/30008/5351/4256/10272/4982/7422/5054/4147/9235/388/25890/3487/3576/8572/2014/4638/6385/2026/5817/3956/7076/59/1284/1311/3725/3371/4312/3600/3569/7128
HALLMARK_HEME_METABOLISM	HALLMARK_HEME_METABOLISM	197	0.278653	1.43255	0.0157862	0.0225517	0.00617204	6052	tags=46%, list=34%, signal=31%	5526/360/51094/5886/5606/2145/50865/7351/5909/80344/7145/4005/27429/4779/1039/26020/51257/10422/6535/2039/644/4059/645/6397/3043/25901/54977/8991/682/8273/847/4259/2995/10133/7001/51092/1497/7389/11163/2235/2057/80148/3068/23762/669/3045/6513/9663/3029/25793/4354/63891/9911/115201/4601/7832/3005/23608/25796/220972/10553/1193/9091/51573/896/10171/27102/22936/760/831/23052/54498/55030/56674/64122/5…
HALLMARK_KRAS_SIGNALING_UP	HALLMARK_KRAS_SIGNALING_UP	196	0.262692	1.35266	0.034153	0.0461527	0.0126313	5643	tags=40%, list=31%, signal=28%	83483/6480/7133/3728/5743/2022/81617/5328/3561/8808/2517/1520/3290/5696/4013/50486/347/7476/2995/23645/56172/2591/3689/9971/5327/6590/4803/10457/26499/3394/629/951/208/51704/3627/6004/8431/2012/669/1839/55107/51129/54893/80201/101/10912/6324/7102/2324/10205/3976/23643/23268/330/2069/2150/4319/30001/7128/2745/11184/7805/7462/10103/2254/760/5284/5243/28959/6696/9314/3486/25907/7852/9053/3587/8404/1…
HALLMARK_SPERMATOGENESIS	HALLMARK_SPERMATOGENESIS	135	-0.305744	-1.68261	0.000532497	0.000918099	0.000251269	4732	tags=39%, list=26%, signal=29%	116/83700/10254/1761/29118/4744/814/10038/6447/116832/2918/10124/11004/8624/9063/2515/1459/8900/54558/6790/23397/56/673/5576/9133/1630/56903/4867/3267/157807/3416/1033/11144/1047/8028/79882/55342/699/5884/64395/2146/7091/4751/8161/5984/7272/23411/7247/11073/10926/983/6558
HALLMARK_MITOTIC_SPINDLE	HALLMARK_MITOTIC_SPINDLE	197	-0.375256	-2.19059	2.90318e-09	1.11661e-08	3.05598e-09	3619	tags=43%, list=20%, signal=35%	11004/4628/8243/10276/5981/2035/7074/4690/23637/22919/2037/5311/6790/4281/85464/24137/55755/55125/9133/10426/22974/23332/11214/4853/9462/8936/9055/4001/22920/9793/10128/23012/6453/394/9493/29127/9874/699/51203/9787/1739/4751/1063/56992/7272/7840/10403/324/7153/26271/1062/55785/51174/54443/1894/5048/4763/9735/11064/9113/3832/9126/55835/253260/10051/57679/983/5922/9585/9702/675/163786/5921/5108/609…
HALLMARK_MYC_TARGETS_V1	HALLMARK_MYC_TARGETS_V1	199	-0.38382	-2.24043	2.78045e-10	1.26384e-09	3.45893e-10	3635	tags=43%, list=20%, signal=34%	8318/6428/5887/1503/54107/3838/1017/10728/2058/6427/1207/10576/6950/9221/7324/6629/1176/3015/2935/4173/7298/1964/6632/4869/10987/10213/8454/6599/2079/3178/5111/10575/6418/10054/4175/6432/5707/6240/3329/3837/8886/1982/9188/6741/5683/3184/5685/8669/4673/7411/1665/5706/1965/10971/9184/3376/10236/5984/22916/6434/1854/4085/6204/9868/11260/6426/5682/890/3192/7913/3181/11335/3066/220988/10146/6732/7398/…
HALLMARK_G2M_CHECKPOINT	HALLMARK_G2M_CHECKPOINT	196	-0.587109	-3.41831	1e-10	5e-10	1.36842e-10	4585	tags=71%, list=25%, signal=53%	3619/3609/1163/4331/10293/1869/332/10024/4609/5426/9700/7371/10036/51659/8819/8318/11004/1870/5887/8243/11044/11065/1736/10664/8438/3838/993/51776/6427/1432/9221/9232/2176/3015/2935/10951/6790/262/6632/1946/94239/81539/4211/24137/4678/9133/4691/7468/5926/990/22974/4288/3149/4853/8454/9462/6599/1756/595/9055/4001/1058/9252/1033/4175/3837/5558/3925/22823/8452/3184/9493/29127/8451/699/51203/2146/649…
HALLMARK_E2F_TARGETS	HALLMARK_E2F_TARGETS	200	-0.591468	-3.45251	1e-10	5e-10	1.36842e-10	4956	tags=73%, list=27%, signal=54%	3978/203068/4605/5347/55723/4292/7374/3609/1163/5511/10528/5901/5902/1786/332/4609/5426/146909/6117/8914/9700/55646/147841/83461/55143/6119/9918/5889/64858/10606/11004/64785/7465/8243/10664/898/5395/1503/9125/5981/3838/993/8493/3148/6427/9221/9232/3015/29893/2935/4173/6790/11200/84296/24137/4678/54962/9133/9319/4288/3149/10615/9837/5111/6241/79733/9183/4001/54556/29089/11340/1033/4175/5931/5558/3…

## Sheet: gsea_liver_ZDHHC7
ID	Description	setSize	enrichmentScore	NES	pvalue	p.adjust	qvalues	rank	leading_edge	core_enrichment
HALLMARK_MYC_TARGETS_V2	HALLMARK_MYC_TARGETS_V2	58	0.619425	2.53847	6.23232e-10	3.11616e-09	1.31207e-09	4045	tags=69%, list=22%, signal=54%	23223/51388/4839/51491/5036/23082/54663/51154/705/9238/79050/10171/3336/10528/56342/80324/6832/56915/4174/10199/81887/23481/26354/9136/3177/11335/10733/6723/79711/2193/4609/9221/9064/6949/5347/10514/29078/23160/6573/1844
HALLMARK_E2F_TARGETS	HALLMARK_E2F_TARGETS	200	0.60522	3.02644	1e-10	5.55556e-10	2.33918e-10	4850	tags=71%, list=27%, signal=52%	27338/10212/2146/3014/55646/5036/83463/1164/7884/3148/6628/29893/29089/83461/11340/7083/51155/3835/9238/9232/6427/147841/11200/991/7283/29980/11004/10460/4605/994/10528/23594/10797/898/3184/3978/4174/1854/7465/79019/1033/197335/3364/983/9125/10248/5111/5511/6790/5424/84844/5426/6241/6434/4678/9212/79075/146909/1031/10535/9833/993/6941/4830/5902/4176/55143/54962/10615/9319/6839/3070/10733/9700/611…
HALLMARK_HEME_METABOLISM	HALLMARK_HEME_METABOLISM	197	0.591995	2.95801	1e-10	5.55556e-10	2.33918e-10	4521	tags=69%, list=25%, signal=52%	9541/5526/8273/682/360/5715/26502/2623/4354/4005/10422/3049/5886/10661/4059/10171/2145/51218/896/644/51312/6535/5909/10181/10058/4140/27429/1371/2995/7351/3792/3045/7389/3386/5498/51327/4635/2532/2057/9091/3145/3005/222642/6710/129642/54977/55544/25793/5606/2039/56895/9562/51646/2038/645/8364/759/54498/6513/1039/56180/7001/9958/4778/6886/535/7832/51094/7390/665/212/10133/2730/114625/27102/6536/29…
HALLMARK_G2M_CHECKPOINT	HALLMARK_G2M_CHECKPOINT	196	0.587607	2.93435	1e-10	5.55556e-10	2.33918e-10	3837	tags=61%, list=21%, signal=48%	4502/27338/10212/2146/3014/8819/7040/11065/10926/1736/1164/10024/5119/10432/8438/5371/51155/3835/9232/1874/6427/11104/991/51659/11004/10460/4605/9055/1869/994/23594/3184/3151/91746/6632/4174/1058/387893/1033/3364/983/10762/7371/6790/5426/9184/6434/4678/9212/10293/7290/1031/7272/899/993/8140/8451/5976/9493/10403/8318/6839/10733/4957/9700/4751/22823/10036/55872/3925/94239/9156/332/6541/1871/1870/38…
HALLMARK_MYC_TARGETS_V1	HALLMARK_MYC_TARGETS_V1	199	0.552909	2.76508	1e-10	5.55556e-10	2.33918e-10	4276	tags=57%, list=24%, signal=44%	5093/7307/51491/5036/65005/9045/3251/6627/6626/10856/6950/6141/3178/6427/6629/23016/991/3336/10921/8761/7411/8669/10528/5704/51690/10155/3184/8662/6194/6632/4174/1854/6432/22916/6637/6741/5111/5496/9184/3735/6434/26354/2091/9136/8894/11335/2107/6187/26121/6188/4830/6633/5902/4176/8664/6204/7419/5984/8318/10728/6723/10054/5901/3181/2079/3326/5478/10576/6634/5682/6164/6426/6742/3615/22948/6150/3015…
HALLMARK_DNA_REPAIR	HALLMARK_DNA_REPAIR	148	0.519247	2.48408	1e-10	5.55556e-10	2.33918e-10	4220	tags=55%, list=23%, signal=42%	79720/286075/2987/6809/4833/8178/3251/30834/2962/5437/9533/30833/4059/9013/6881/7936/6431/4860/6829/6621/51160/11130/51082/6878/2959/3978/51497/1716/1854/5893/51251/11047/10189/203/10289/22916/27343/9328/2958/5111/5424/54487/29901/2237/5888/25920/3704/5440/4830/1069/8086/5148/5984/9978/6119/5439/5985/6883/5983/7372/8480/3615/8237/5438/353/5982/7157/10623/23204/56655/65109/6386/129607/10134/10978/…
HALLMARK_TNFA_SIGNALING_VIA_NFKB	HALLMARK_TNFA_SIGNALING_VIA_NFKB	197	0.450468	2.25084	1e-10	5.55556e-10	2.33918e-10	5051	tags=50%, list=28%, signal=36%	8061/7262/8878/5054/1435/23645/51278/10950/4791/79155/1847/23764/9322/5970/23529/8767/6364/8877/4170/5971/650/80149/10209/79693/24147/22822/5187/3726/3949/5329/9034/25816/5606/2150/10318/9021/9334/4794/1942/1846/3460/7832/8744/9592/5209/4084/8870/3383/57018/941/3976/10769/6776/960/10010/374/80176/2355/1052/3553/4609/3601/1316/6515/55332/10938/2921/2114/4088/5055/7097/150094/1839/1844/1326/7538/72…
HALLMARK_UV_RESPONSE_UP	HALLMARK_UV_RESPONSE_UP	158	0.419357	2.02176	2.98253e-07	1.35569e-06	5.70819e-07	3706	tags=38%, list=21%, signal=30%	8878/1030/10950/3162/226/2288/10948/3337/3014/51083/682/10494/5437/360/650/997/5580/10963/3757/27161/9296/896/6535/10652/898/1181/3726/7389/1119/11333/10018/2237/4072/7277/7832/5984/116138/2011/3383/1028/409/440/1175/6150/58525/8692/11232/5471/262/836/8694/1017/9129/51706/10038/5702/7037/55937/9818/528
HALLMARK_REACTIVE_OXYGEN_SPECIES_PATHWAY	HALLMARK_REACTIVE_OXYGEN_SPECIES_PATHWAY	49	0.411334	1.63225	0.0129098	0.023907	0.0100661	4431	tags=45%, list=25%, signal=34%	22904/57466/2539/10494/112398/1032/3726/10542/7001/2730/2512/2729/9943/4710/7295/4353/51022/55829/5214/140809/6648/4700
HALLMARK_MTORC1_SIGNALING	HALLMARK_MTORC1_SIGNALING	199	0.370421	1.85246	4.8895e-06	1.62983e-05	6.86246e-06	2780	tags=26%, list=15%, signal=22%	27101/8878/23645/226/6016/10212/2539/3251/5718/23062/5352/10963/4793/871/4860/3336/7283/10652/6510/10797/5704/112399/3949/5719/2717/3145/11333/5606/6790/6241/6781/9136/8894/2107/2597/899/6513/908/7277/993/8140/10452/5163/7832/30001/51382/3308/5478/2729/5464/9521/440
HALLMARK_UNFOLDED_PROTEIN_RESPONSE	HALLMARK_UNFOLDED_PROTEIN_RESPONSE	112	0.363718	1.65258	0.00113749	0.00270831	0.00114034	4219	tags=39%, list=23%, signal=30%	468/7709/55738/30827/3014/9531/1736/8815/5393/55466/5394/10528/10797/56915/2081/51013/3484/9136/8140/9797/30001/55062/1974/54512/64061/440/27257/9221/8570/55651/6208/8614/2521/1965/25804/1978/167227/7534/23404/9775/6897/64859/7280/57472
HALLMARK_P53_PATHWAY	HALLMARK_P53_PATHWAY	198	0.361406	1.805	1.47337e-05	4.60428e-05	1.93864e-05	3582	tags=32%, list=20%, signal=26%	1263/1030/23645/6520/51278/5900/3162/92815/8812/7040/1969/8877/23378/5912/55367/64782/57799/49856/650/55035/6141/55766/896/3265/581/30836/5883/8651/1606/2872/203/10397/5111/247/10057/7832/8744/5564/3625/2810/4084/8870/63874/8841/6275/5889/7378/51002/3976/64061/10769/7421/29946/10399/3006/7157/9618/25873/30851/4193/10608/55332/6281
HALLMARK_MITOTIC_SPINDLE	HALLMARK_MITOTIC_SPINDLE	197	0.349152	1.7446	6.83398e-05	0.000189833	7.99296e-05	5172	tags=48%, list=29%, signal=35%	55201/23192/116840/9564/9181/3831/89941/10435/7248/22994/3835/54509/11104/85378/11004/80119/9055/983/11190/396/163786/6790/10018/11135/11133/29901/5829/7272/1453/7277/9493/6904/10403/10300/22919/9700/393/4751/55835/10844/382/64857/55722/332/10426/3832/4926/9133/5116/51203/9266/4650/2934/29127/26271/2017/10163/8874/9735/3619/10051/699/4627/56992/22974/5347/201176/996/51735/8409/10276/55755/54443/8…
HALLMARK_HYPOXIA	HALLMARK_HYPOXIA	200	0.337513	1.68776	0.000328897	0.000822242	0.000346207	3560	tags=30%, list=20%, signal=25%	5054/23645/4502/23764/3162/226/5260/1944/55139/23210/8819/7511/5292/4493/136/5165/3669/771/5329/3484/10397/26118/6781/9435/2597/6513/58528/55818/3036/1942/123/5163/56925/665/30001/5209/2239/3098/8870/133/6275/1028/8991/272/5228/23327/1027/2355/8974/4601/3623/8509/8614/302/1316/4627/6515/5155/5033/4015/55577
HALLMARK_APOPTOSIS	HALLMARK_APOPTOSIS	160	0.316657	1.5307	0.00386974	0.00841248	0.0035421	3160	tags=26%, list=18%, signal=21%	6574/3315/51330/8878/10950/3162/5970/5526/4000/4170/3148/89941/650/2769/7078/994/3669/581/7465/3005/7417/10018/598/2107/5058/7832/665/3875/8870/5366/4744/8915/10059/2934/960/7818/1027/8682/3553/836/1017
HALLMARK_IL2_STAT5_SIGNALING	HALLMARK_IL2_STAT5_SIGNALING	198	0.299101	1.49383	0.00427329	0.00890268	0.0037485	3530	tags=29%, list=20%, signal=24%	1435/23764/4839/2623/11230/5292/650/27242/7293/6050/9144/177/4860/896/8784/22822/5339/6510/898/51651/80324/10124/822/8651/3566/10397/7371/4582/1690/598/81848/3177/58528/55509/123/1154/943/84306/4084/3586/1028/7372/2118/3976/152007/960/836/4609/5025/4641/990/942/56990/51429/64866/1316/6515/5033
HALLMARK_INFLAMMATORY_RESPONSE	HALLMARK_INFLAMMATORY_RESPONSE	199	0.270701	1.35377	0.0220563	0.0393863	0.0165837	4724	tags=36%, list=26%, signal=27%	5054/1435/6354/5970/9966/10507/8767/6364/2014/8877/391/5008/2769/136/3386/3949/5329/11047/3566/9034/1604/9435/6717/3460/7832/8744/4084/3586/133/6541/3383/5894/3976/4891/1441/623/3553/4609/5025/728/7439/3601/5817/1316/55829/10148/7076/4481/1440/6004/3576/7097/2015/6369/1839/8685/23601/719/8578/27032/23166/3606/5791/5996/3604/3656/2811/7130/1236/2867/7133
HALLMARK_KRAS_SIGNALING_DN	HALLMARK_KRAS_SIGNALING_DN	195	-0.231757	-1.26607	0.0280917	0.048434	0.0203933	6632	tags=44%, list=37%, signal=28%	55610/6620/5650/6531/398/3866/9499/7367/55506/51087/2044/6262/51384/1952/6927/7704/2895/6261/10777/5030/27076/6528/5317/495/3785/83714/58157/5071/8786/8900/10964/5540/3780/9127/3593/3458/2668/55890/6663/9992/1907/7781/3779/4908/4599/10991/4842/1271/676/11346/79696/9746/51168/29799/1360/57089/8647/152/797/6498/57451/80303/3195/55277/3291/10734/79085/7771/54847/10913/22849/5737/51226/56997/51156/18…
HALLMARK_ESTROGEN_RESPONSE_EARLY	HALLMARK_ESTROGEN_RESPONSE_EARLY	198	-0.246933	-1.35556	0.00830104	0.0166021	0.00699035	4529	tags=36%, list=25%, signal=27%	7071/11145/10160/2194/55806/6820/7074/51195/22836/7033/3487/9536/25800/3983/403/58495/10202/64699/7494/6840/10125/6990/25987/5979/54898/9060/54463/5241/27134/6337/267/10140/64284/595/6505/375449/28966/10105/91683/64919/9620/23541/4886/107/8645/5029/26018/5174/8204/367/64798/79754/56944/8416/11057/7164/2674/79875/4603/115/18/6584/80004/11001/6387/8800/55793/2444/55686/9368/8165
HALLMARK_UV_RESPONSE_DN	HALLMARK_UV_RESPONSE_DN	144	-0.28959	-1.5129	0.00310375	0.00705398	0.0029701	4121	tags=34%, list=23%, signal=26%	50937/11099/8476/3638/2908/10486/23345/10516/8503/7049/5581/4255/657/26037/23116/55109/9975/23266/54468/9863/3778/8613/4853/4781/4233/8821/7410/11343/1628/5737/23229/92/7082/307/2064/5728/23576/8455/6383/1739/10611/3667/8621/323/6334/6310/5578/5607/594
HALLMARK_PROTEIN_SECRETION	HALLMARK_PROTEIN_SECRETION	95	-0.299877	-1.45902	0.0117474	0.0225911	0.00951206	2487	tags=27%, list=14%, signal=24%	6647/10565/7103/2803/5862/23095/10564/9871/3920/23041/23033/8615/51552/4952/7163/3998/164/667/8082/27236/9525/11311/10040/10959/1203/10972
HALLMARK_ADIPOGENESIS	HALLMARK_ADIPOGENESIS	200	-0.312073	-1.72104	2.64813e-05	7.78862e-05	3.27942e-05	3383	tags=34%, list=19%, signal=28%	847/204/35/3679/92840/4191/1468/7905/400916/8802/593/1652/51727/4958/54884/5264/5495/6647/130814/10140/28512/718/10400/8404/84173/6817/217/6390/23786/79071/4189/1892/11343/1666/23344/57017/33/54996/2632/10935/5860/2184/83549/9131/57678/84274/51/6342/10449/2053/4638/134147/8082/1738/1384/34/3033/6391/26275/1376/9936/23788/5236/10243/1629/3417/56922
HALLMARK_COAGULATION	HALLMARK_COAGULATION	136	-0.323198	-1.67877	0.000163256	0.000429622	0.000180894	2872	tags=33%, list=16%, signal=28%	3249/2266/1803/5624/341/10747/462/1638/2165/710/2335/7018/718/3426/733/164656/732/3920/3075/3818/4153/3158/10404/735/715/9615/283/5340/5654/716/4324/649/726/6271/731/2158/4035/2160/3273/1361/9104/8309/3172/5627/1519
HALLMARK_INTERFERON_GAMMA_RESPONSE	HALLMARK_INTERFERON_GAMMA_RESPONSE	198	-0.337174	-1.85094	1.87764e-06	7.2217e-06	3.04071e-06	5222	tags=50%, list=29%, signal=36%	6892/629/85441/94240/3429/9111/4283/3959/972/6373/10964/5683/6890/4600/3663/5698/5720/567/55072/57823/317649/3117/5743/4599/25939/10875/3600/7706/958/84888/163351/3430/7127/219285/5721/81030/4939/10561/27348/4940/5696/3627/3659/54739/3001/2841/6375/4261/3431/3108/841/3437/3620/834/55601/22914/8638/23586/710/5699/196410/3434/6775/54625/3433/3560/11274/3075/80830/9934/64135/79132/64108/715/23424/55…
HALLMARK_PEROXISOME	HALLMARK_PEROXISOME	104	-0.41067	-2.02655	4.20505e-06	1.5018e-05	6.32339e-06	2830	tags=40%, list=16%, signal=34%	3416/8443/54884/1718/30/5828/347734/6647/3291/5190/2180/5243/373156/5244/1503/51179/51/6342/8856/51015/2053/10455/1733/216/8799/3155/1962/11001/23705/9525/8800/83752/1384/412/23417/6310/223/5830/291/3417/3295/5825
HALLMARK_INTERFERON_ALPHA_RESPONSE	HALLMARK_INTERFERON_ALPHA_RESPONSE	96	-0.432215	-2.10021	4.6568e-07	1.94033e-06	8.16982e-07	5150	tags=58%, list=29%, signal=42%	85441/94240/3429/9111/3959/972/6373/10964/8519/6890/5698/5720/567/55072/4599/1267/3600/7706/3430/219285/5721/10561/5696/4938/3627/3659/3431/841/3437/834/55601/8638/54625/3433/11274/64135/79132/64108/23424/55008/115361/3574/716/85363/4061/83666/684/6773/116071/5610/103/51056/51667/7726/7318/9830
HALLMARK_XENOBIOTIC_METABOLISM	HALLMARK_XENOBIOTIC_METABOLISM	197	-0.439952	-2.40545	1e-10	5.55556e-10	2.33918e-10	2798	tags=46%, list=16%, signal=39%	1652/8644/54884/26998/6898/8310/5166/9060/978/51380/8714/2203/1573/9054/51181/3290/4121/1544/27232/383/51128/5699/488/5950/4128/65018/10400/22949/3479/1562/1528/6472/217/28959/115817/211/6580/4153/2099/1036/10857/5340/283537/26007/2184/2646/1571/1644/355/366/1066/51733/316/55748/1593/2052/2328/4522/6999/2948/7498/51/2160/2940/7009/839/2028/2110/131/8529/7274/6539/3273/1244/873/57447/27329/8309/57…
HALLMARK_FATTY_ACID_METABOLISM	HALLMARK_FATTY_ACID_METABOLISM	155	-0.452405	-2.39337	1e-10	5.55556e-10	2.33918e-10	3084	tags=46%, list=17%, signal=38%	92840/4191/364/8802/5910/54884/26330/1718/30/4913/5793/4683/11185/1579/3028/4128/3248/2027/1892/6389/11343/284541/2180/3158/1666/2271/5465/8608/33/6392/2954/8803/2052/6999/2819/5092/3032/51179/51/10449/10965/2110/131/9380/10455/873/1429/84693/1738/51166/216/6584/224/3155/1962/670/8801/1384/6296/23417/84263/34/3033/6391/4190/26275/1376/223/594/3417/3295
HALLMARK_BILE_ACID_METABOLISM	HALLMARK_BILE_ACID_METABOLISM	112	-0.596127	-3.00236	1e-10	5.55556e-10	2.33918e-10	3988	tags=67%, list=22%, signal=52%	1734/54677/9023/80270/19/9962/3932/847/7276/23461/27284/189/225/1581/2638/8443/54884/196743/1718/5264/347734/6647/5191/27232/20/10351/10350/5190/8424/8412/2180/10858/92960/23460/366/5827/1593/9420/10998/367/373156/1582/54363/4734/6342/51268/8856/8630/51015/2053/4306/1733/51302/23600/216/11001/64241/64577/9963/8800/83752/5824/6718/55825/23417/26061/6310/83594/223/5193/5189/9971/3417/3295/5825

## Sheet: gsea_ovary_ZDHHC7
ID	Description	setSize	enrichmentScore	NES	pvalue	p.adjust	qvalues	rank	leading_edge	core_enrichment
HALLMARK_ANGIOGENESIS	HALLMARK_ANGIOGENESIS	36	0.528371	2.01656	0.000188514	0.00094257	0.000416715	3861	tags=61%, list=21%, signal=48%	351/6696/11167/8829/6275/27242/5154/6578/1462/4023/5553/7448/10631/1290/5104/894/7422/182/7056/4060/5196/3685
HALLMARK_WNT_BETA_CATENIN_SIGNALING	HALLMARK_WNT_BETA_CATENIN_SIGNALING	42	0.505289	2.01819	0.000150118	0.000833991	0.000368712	3314	tags=45%, list=18%, signal=37%	8325/7157/4855/9794/28514/4851/81029/6502/1499/894/8321/4609/2770/1856/23462/6868/182/23385/22943
HALLMARK_TGF_BETA_SIGNALING	HALLMARK_TGF_BETA_SIGNALING	54	0.498809	2.09072	1.82454e-05	0.000152045	6.72201e-05	5153	tags=56%, list=29%, signal=40%	3065/4088/4092/11031/57154/6574/6885/1499/9241/7040/5499/28996/3399/25937/4091/2280/3460/3398/7044/6497/64750/2339/7046/90/5045/387/657/1028/2022/7082
HALLMARK_APICAL_SURFACE	HALLMARK_APICAL_SURFACE	44	0.44138	1.78955	0.00195341	0.00751312	0.00332159	3351	tags=43%, list=19%, signal=35%	351/4118/4067/6376/80274/2619/2050/116085/2625/5205/55959/22854/102/3560/2319/5314/1946/5329/84632
HALLMARK_EPITHELIAL_MESENCHYMAL_TRANSITION	HALLMARK_EPITHELIAL_MESENCHYMAL_TRANSITION	199	0.438918	2.31491	1e-10	5e-09	2.21053e-09	4517	tags=46%, list=25%, signal=35%	4232/3678/8325/8038/6696/871/7168/3486/1601/6586/6591/11167/6387/7052/9353/2335/4015/4837/2619/10409/5159/10979/5806/813/627/10085/1490/2303/6382/1462/5118/25878/4907/7431/2882/2201/1314/7171/10631/1290/333/7412/1647/800/7040/4323/22795/290/2200/6876/7456/115908/7424/7422/1303/5217/8985/4016/1000/4982/6678/3398/64175/7049/2192/1004/5329/22943/5352/6443/30008/4060/5654/3693/5021/3685/1009/23705/79…
HALLMARK_NOTCH_SIGNALING	HALLMARK_NOTCH_SIGNALING	32	0.434013	1.61131	0.0188592	0.0390944	0.0172839	7044	tags=72%, list=39%, signal=44%	28514/8324/4851/4854/84441/5578/6934/595/8321/10402/182/408/55851/26508/3280/23291/3955/7855/7472/51107/23220/4853/9978
HALLMARK_MYC_TARGETS_V1	HALLMARK_MYC_TARGETS_V1	199	0.413636	2.18157	2.59337e-10	6.45537e-09	2.85395e-09	5903	tags=51%, list=33%, signal=35%	7416/5250/328/65005/3068/8664/4869/5478/6128/5688/1019/52/11331/3183/1017/3181/4953/7298/6432/3184/7458/5093/23435/5704/6434/22916/6426/6627/5713/7307/5685/10935/10987/1973/3178/6418/3015/6428/5709/4673/26135/4609/3615/1665/6741/3376/220988/6629/26156/1982/10236/4830/26354/10399/6599/2107/1207/5036/5245/5690/821/8886/6427/3192/3735/991/7027/7332/2739/890/3326/2058/10213/6146/2935/56910/7531/28973…
HALLMARK_APICAL_JUNCTION	HALLMARK_APICAL_JUNCTION	197	0.375517	1.97527	2.4344e-07	3.043e-06	1.34533e-06	5709	tags=51%, list=32%, signal=35%	7216/5089/6714/83700/5818/1495/5335/1366/7059/6464/6376/71/9353/149461/1265/1364/8910/7248/3680/4628/2771/80381/3636/3384/947/51474/5819/60/7414/4267/1462/1006/4478/9459/8754/55742/1825/92359/6850/9019/347902/1002/7412/70/4192/8515/9672/7073/7408/2200/208/1500/2770/7533/60412/2318/9074/4982/79849/5097/1823/10109/91624/1004/3675/5788/64398/5871/247/2533/4902/84552/57555/6624/3728/1009/87/51466/368…
HALLMARK_UV_RESPONSE_DN	HALLMARK_UV_RESPONSE_DN	144	0.372278	1.87062	4.02064e-05	0.000284691	0.000125863	5153	tags=44%, list=29%, signal=32%	4088/2064/11030/2869/4092/1601/6591/8613/11343/493/8405/1902/6256/8829/8997/302/7035/2202/5159/9863/627/5578/10659/2535/1290/7048/10370/2534/57178/10395/4609/4131/22884/23266/10401/390/7049/29970/3480/4052/594/773/120/6383/91746/10611/3037/11044/9112/3915/3491/5581/2152/1739/23576/657/1278/6541/3949/3488/273/5797/3690/7082
HALLMARK_HEME_METABOLISM	HALLMARK_HEME_METABOLISM	197	0.348428	1.83278	5.97572e-06	5.97572e-05	2.6419e-05	3282	tags=31%, list=18%, signal=26%	51092/4354/57610/760/51312/3145/210/23351/80344/27102/55532/114625/51094/10181/3068/4778/2623/6886/847/4891/56895/6005/118/3050/2994/6622/6708/56180/2057/23530/7150/831/3321/2996/5606/3792/10840/6521/1510/2995/1182/8991/212/2993/286/4635/51327/51573/7001/4059/5091/50865/23365/9562/3045/645/10661/3005/2145/129642/5498
HALLMARK_PI3K_AKT_MTOR_SIGNALING	HALLMARK_PI3K_AKT_MTOR_SIGNALING	104	0.334632	1.58674	0.00714827	0.0178707	0.00790072	2554	tags=25%, list=14%, signal=22%	5894/6773/1845/7184/6195/117145/7132/5335/1019/4615/1017/5608/10392/207/10451/5606/5879/6885/811/1072/5499/8737/5899/6503/5781/6016
HALLMARK_IL6_JAK_STAT3_SIGNALING	HALLMARK_IL6_JAK_STAT3_SIGNALING	85	0.332364	1.53125	0.0110601	0.0251365	0.011113	3960	tags=33%, list=22%, signal=26%	6773/1438/7132/91/4615/27242/3162/56034/7297/8809/7040/1230/2/5781/3460/5770/1441/948/3676/3459/578/10379/94/5196/1439/1435/2885/3597
HALLMARK_ANDROGEN_RESPONSE	HALLMARK_ANDROGEN_RESPONSE	99	0.310269	1.46627	0.01278	0.0277827	0.0122829	4514	tags=39%, list=25%, signal=30%	6446/7113/1622/3992/207/10461/595/6722/51465/57178/10788/9590/84159/55839/10627/10645/54407/5036/563/3005/5867/1021/9510/10611/3157/8848/6319/7520/3248/8555/3685/60559/25816/2289/51171/87/10397/6414/7329
HALLMARK_IL2_STAT5_SIGNALING	HALLMARK_IL2_STAT5_SIGNALING	198	0.30242	1.59353	0.000959138	0.00435972	0.00192745	4629	tags=34%, list=26%, signal=25%	3177/4860/130589/79971/6271/760/1522/7371/6696/5325/81848/2623/64375/7052/23258/8728/8829/80760/3682/4953/2151/8600/10970/2184/27242/974/123/23413/4907/5583/333/4582/64116/8809/894/28996/3560/3587/2983/4609/9446/5243/6402/3482/23600/3459/3480/598/1316/9261/23208/84230/1435/9173/3685/5167/11230/5745/51284/4641/200734/5045/23710/10397/7372/2879/8477
HALLMARK_HYPOXIA	HALLMARK_HYPOXIA	200	0.290562	1.52929	0.00254206	0.00860263	0.00380327	4796	tags=34%, list=27%, signal=25%	7511/2997/5228/2542/5155/55076/3486/5313/9215/2719/1466/7052/9380/2131/4015/302/6275/2113/5105/10570/3340/1490/5578/10891/2597/123/23327/8991/3162/771/10370/5837/2023/1837/9672/6533/5066/56925/9590/1942/7422/3219/55577/55139/57007/1316/5329/5260/6383/7167/26136/26118/2239/633/54206/2203/2309/3491/30001/10397/1289/901/2152/126792/3423/1356/1028/8497
HALLMARK_MYOGENESIS	HALLMARK_MYOGENESIS	198	0.290321	1.52978	0.0029126	0.00910188	0.00402399	5807	tags=43%, list=32%, signal=29%	5213/3270/3983/2224/351/8038/3486/1012/9215/3316/10468/4684/1410/1839/2049/5740/26353/4851/5569/1266/7139/7135/1140/70/4635/5837/7040/1837/187/4303/7170/5091/25937/208/140465/6876/4208/6016/1146/10278/7140/6678/948/6709/4634/29970/2878/23604/58529/9659/274/8912/23654/9260/6319/6525/3693/786/22933/7138/6840/4641/203/2934/1674/3688/6535/859/3757/8497/624/2027/58/5348/6442/9144/7169/845/3475/375790/…
HALLMARK_G2M_CHECKPOINT	HALLMARK_G2M_CHECKPOINT	196	0.287884	1.51332	0.0034282	0.0100348	0.00443646	5663	tags=44%, list=31%, signal=30%	4088/7371/4212/1019/9212/4953/11065/3184/10024/3609/7150/4001/4211/6434/3226/6426/595/10664/9232/7040/387893/26271/2146/5347/3015/25/24137/4609/8438/1946/6421/5048/94239/4691/2130/1871/81539/9493/6599/4288/3925/983/6427/3192/51203/3980/1163/56992/91746/11004/991/7027/10432/890/9700/899/22974/10721/11044/8899/10762/2935/3151/6790/10403/4957/3799/10951/6491/5885/6541/1063/332/3930/3161/22823/7090/1…
HALLMARK_FATTY_ACID_METABOLISM	HALLMARK_FATTY_ACID_METABOLISM	154	0.287438	1.46033	0.0100635	0.0239607	0.0105931	6069	tags=43%, list=34%, signal=29%	760/8802/210/328/2819/5092/11343/9380/51179/2752/762/2639/4953/9588/2169/3420/5465/51109/670/7358/387893/3155/3015/1666/1743/7533/51166/3417/11185/1429/549/948/10449/9246/594/4190/364/8876/57515/3157/8608/3248/4191/51478/58505/5793/158/3158/23710/39/4128/3033/1892/912/2027/51170/7389/8803/3295/60481/8801/4683/37/26275/2820/2168
HALLMARK_MTORC1_SIGNALING	HALLMARK_MTORC1_SIGNALING	199	0.287164	1.51454	0.00361255	0.0100348	0.00443646	5248	tags=39%, list=29%, signal=28%	4048/2542/4860/3145/7184/871/9368/5641/9415/5478/5693/1075/3992/23478/23760/4836/5606/2597/5704/2805/51109/811/10962/5685/5701/4802/10987/5723/2023/80777/5347/6533/23165/5861/3689/3417/6503/2717/6509/6016/26227/6241/900/2107/821/23062/120/10061/5352/27071/3157/7167/6319/134429/899/26136/2058/10213/5719/516/6790/6715/10097/2932/30001/5199/6472/51377/3949/1719/6117/3488/1491/586/5211/3329/47
HALLMARK_MITOTIC_SPINDLE	HALLMARK_MITOTIC_SPINDLE	197	0.282622	1.48663	0.00258079	0.00860263	0.00380327	4997	tags=37%, list=28%, signal=27%	9181/10160/116840/5829/64857/80119/7248/50650/2017/4628/23332/4001/7414/10276/4739/4281/1453/9266/2317/29/832/11346/64411/26271/51199/5347/25/24137/9732/23365/5048/4650/9493/6709/23022/3797/983/51203/23637/56992/9371/11004/9702/274/10611/10435/55785/57679/9700/11190/22974/6624/5311/79658/57787/2934/23647/11135/6790/10403/7531/10801/3799/5981/8440/1739/1063/332/10006/7204/7461/1794
HALLMARK_COMPLEMENT	HALLMARK_COMPLEMENT	197	0.273669	1.43954	0.00513331	0.0135087	0.00597228	4105	tags=32%, list=23%, signal=25%	7511/4048/2793/5894/5580/6714/760/5547/5155/5641/1012/4067/4855/2335/3172/3684/2771/3937/1075/1803/1848/11108/8754/801/1368/6280/2625/5663/5550/51056/2534/4323/2159/3075/2219/30819/1465/9732/5055/8942/959/808/10019/3988/948/5321/6283/2207/2230/475/6284/5329/5341/200316/3303/710/4179/2885/64145/7454/834/7980/1508/5327
HALLMARK_OXIDATIVE_PHOSPHORYLATION	HALLMARK_OXIDATIVE_PHOSPHORYLATION	200	0.261227	1.37489	0.0195472	0.0390944	0.0172839	6566	tags=42%, list=36%, signal=27%	4720/7416/8802/3945/5250/3418/509/11331/56898/517/23530/4697/8604/5018/3420/1431/4552/506/10935/1528/4724/36/1666/1743/3417/7417/7385/10449/518/1347/10476/2230/3030/4190/8402/9296/2395/1351/4710/1349/29088/4191/1355/4329/29796/2108/2109/516/4714/65003/4729/7381/1350/2879/5264/2746/10632/4709/4704/1892/539/514/8992/1340/64960/26521/26520/581/4708/8803/4835/37/4718/2806/51318/498/515/522/1537/293/4…
HALLMARK_INTERFERON_GAMMA_RESPONSE	HALLMARK_INTERFERON_GAMMA_RESPONSE	197	-0.26622	-1.49984	0.00171352	0.00713968	0.00315649	4091	tags=36%, list=23%, signal=28%	219285/5292/10797/7378/9830/3135/3627/51015/91543/837/3659/10561/5359/8082/22914/6890/6892/79132/4061/716/3959/9688/10124/4792/29126/5696/84166/6347/54739/6373/8869/256586/57169/23070/55072/10906/55601/25939/7453/11274/129607/9111/715/5698/567/629/64761/2643/3669/841/3433/57823/55008/6648/3123/9961/64108/80830/3106/3117/317649/23424/972/55024/952/4261/64135/115361/7128/163351/4283
HALLMARK_INTERFERON_ALPHA_RESPONSE	HALLMARK_INTERFERON_ALPHA_RESPONSE	96	-0.376283	-1.88257	4.55505e-05	0.000284691	0.000125863	4922	tags=52%, list=27%, signal=38%	3600/2766/3437/8767/10964/3430/85441/4599/219285/9830/3627/91543/3659/10561/5359/83666/6890/79132/4061/55281/716/3959/5696/6373/23070/55072/10906/55601/7453/54809/961/2634/55603/11274/129607/9111/5698/567/3107/64761/3669/841/3433/55008/64108/23424/972/135112/64135/115361
HALLMARK_SPERMATOGENESIS	HALLMARK_SPERMATOGENESIS	134	-0.440639	-2.37052	3.87322e-10	6.45537e-09	2.85395e-09	4862	tags=51%, list=27%, signal=38%	135138/84519/246/10047/7091/5232/7272/10254/3211/7141/3306/55743/3267/8277/4225/165721/5884/81570/1047/148066/3305/83401/5443/10124/5414/4744/2672/2475/3361/8624/1636/7142/11055/8900/83445/56903/10880/27344/51087/29118/8100/6447/22824/4291/6847/116832/6518/64180/8852/10693/419/54514/51686/7278/116/9053/79696/3598/84779/6954/9892/51298/2571/11144/3010/3948/132612/5161/51533

## Sheet: gsea_testis_ZDHHC7
ID	Description	setSize	enrichmentScore	NES	pvalue	p.adjust	qvalues	rank	leading_edge	core_enrichment
HALLMARK_EPITHELIAL_MESENCHYMAL_TRANSITION	HALLMARK_EPITHELIAL_MESENCHYMAL_TRANSITION	199	0.52186	3.47436	1e-10	1.25e-09	3.42105e-10	6035	tags=70%, list=33%, signal=48%	2316/800/7171/7168/3678/4313/5217/7049/7424/57692/10979/1314/7431/3693/30008/6641/6387/1601/649/1809/5159/7040/2882/3487/6445/871/1009/1284/1282/11167/7456/9353/2331/4323/813/8985/4232/5654/5329/2619/7045/22795/79709/2335/6586/3688/4035/3915/3685/4017/3398/6591/5806/633/5376/1296/6696/3690/64175/1292/7070/1290/5351/25878/1293/6678/5118/7052/4147/2192/6422/1278/50863/2201/10085/6382/1289/7422/1634…
HALLMARK_TGF_BETA_SIGNALING	HALLMARK_TGF_BETA_SIGNALING	54	0.49586	2.50021	4.87537e-07	2.43769e-06	6.67157e-07	5845	tags=67%, list=32%, signal=46%	4088/6497/4092/90/5045/6885/657/7040/25937/1499/2339/387/9612/3399/2280/7050/650/6711/3065/3398/331/4091/659/3397/56937/7057/5499/7323/999/7082/1028/324/6498/6574/28996/7046
HALLMARK_ANGIOGENESIS	HALLMARK_ANGIOGENESIS	36	0.485811	2.2021	0.000154593	0.000336071	9.19774e-05	5851	tags=67%, list=32%, signal=46%	5154/2260/351/182/8829/11167/7410/3685/894/6578/6696/1290/5747/3764/7422/4487/1462/6781/1281/3714/4060/10631/4023/27242
HALLMARK_UV_RESPONSE_DN	HALLMARK_UV_RESPONSE_DN	144	0.465977	2.91108	1e-10	1.25e-09	3.42105e-10	6018	tags=66%, list=33%, signal=45%	8405/10401/4088/2064/1432/23229/6256/10395/4092/11044/7049/91746/1601/5159/1902/657/323/4052/10370/7048/8829/6383/1739/7410/3667/57178/140609/11030/23266/3915/3488/3480/6591/7035/8613/390/50937/5376/4781/3690/4790/2534/27032/1290/29970/546/6310/493/7436/92/1278/2908/1027/4233/2535/1859/120/10611/5797/302/4325/10516/5332/3397/5578/8455/22828/6717/23116/1281/4853/8621/10486/2202/10659/1277/2869/258…
HALLMARK_HEDGEHOG_SIGNALING	HALLMARK_HEDGEHOG_SIGNALING	36	0.462298	2.09552	0.000445802	0.000891603	0.000244018	5728	tags=64%, list=31%, signal=44%	5371/2114/8861/8828/1808/4627/7088/8829/4983/2735/7070/7436/43/1400/1021/7422/3897/4897/5727/1271/9620/8633/5921
HALLMARK_WNT_BETA_CATENIN_SIGNALING	HALLMARK_WNT_BETA_CATENIN_SIGNALING	42	0.456042	2.17672	7.66742e-05	0.000195921	5.36205e-05	5087	tags=64%, list=28%, signal=47%	1454/8650/1856/28514/182/4851/9794/4855/1499/7157/10014/8321/9612/81029/894/3516/6502/8313/5467/2770/8325/23385/3714/8312/5727/4609/3066
HALLMARK_NOTCH_SIGNALING	HALLMARK_NOTCH_SIGNALING	32	0.445129	1.95763	0.00162105	0.00279491	0.000764922	4358	tags=59%, list=24%, signal=45%	51107/23220/595/28514/182/4851/4854/6934/8324/84441/8321/408/23291/3280/7855/5578/5467/4853/3955
HALLMARK_PROTEIN_SECRETION	HALLMARK_PROTEIN_SECRETION	95	0.428785	2.52989	2.60511e-08	2.17093e-07	5.94149e-08	7830	tags=72%, list=42%, signal=41%	2717/8417/22872/5066/6643/286451/23673/1075/23041/3998/102/1315/10959/6197/51552/27236/2778/5868/8774/9276/3482/10282/538/3875/81611/372/11311/1956/9341/3920/9367/22796/57403/8027/8546/1213/6845/81542/9522/5538/9805/10972/8675/858/259230/8082/5594/667/51606/9525/9871/19/10067/476/23095/1203/8729/525/1173/8615/4074/10652/664/23033/967/5862/2581/7163
HALLMARK_IL6_JAK_STAT3_SIGNALING	HALLMARK_IL6_JAK_STAT3_SIGNALING	87	0.390764	2.24092	7.34941e-06	2.8267e-05	7.73622e-06	7902	tags=66%, list=43%, signal=38%	6773/94/7132/7297/4055/7133/7040/1435/56034/3459/1441/10379/3597/3563/2/5781/2885/6774/5292/23765/3690/3572/3676/4615/948/1438/3953/5771/9180/3588/8809/1326/91/1271/6772/3454/7097/928/578/2919/51330/27242/1230/3554/929/10148/960/952/3460/5770/3627/3725/4050/5196/3561/6373/3162
HALLMARK_APICAL_SURFACE	HALLMARK_APICAL_SURFACE	44	0.388274	1.85182	0.00128535	0.00247183	0.000676501	6131	tags=61%, list=33%, signal=41%	84632/2319/55959/351/4067/2050/102/5329/2619/51754/5205/1946/7070/22854/357/2625/3560/3315/27076/9696/8406/4118/146760/255738/131566/266727/2683
HALLMARK_APICAL_JUNCTION	HALLMARK_APICAL_JUNCTION	197	0.366064	2.42525	1e-10	1.25e-09	3.42105e-10	5357	tags=51%, list=29%, signal=37%	6464/9672/1495/55742/8751/4478/1432/7533/208/57555/4313/81/3384/3636/5089/7216/2318/649/5880/24146/71/1265/7185/4627/1500/6251/54413/1009/2771/143903/87/1739/51474/9353/7410/7122/3667/60/84552/7045/80381/3728/51754/947/7106/3688/23114/3680/4628/8754/5335/51148/7414/7073/4192/1956/7408/3675/347902/7070/8910/1001/5747/51466/5818/140885/5310/5871/357/51776/8976/147/5216/1825/11096/2200/1462/1307/945…
HALLMARK_HYPOXIA	HALLMARK_HYPOXIA	200	0.337014	2.24197	4.58595e-09	4.58595e-08	1.2551e-08	6702	tags=57%, list=36%, signal=37%	9672/2131/5066/901/5228/7511/2745/10370/2997/7852/4627/55276/6383/8609/3340/23327/8991/5329/7045/123/694/5230/1942/538/633/6533/3516/26118/1956/596/5292/5507/2113/11015/1316/5260/2355/8974/7052/3423/9435/7436/1837/30001/6478/8509/2309/54800/1289/7422/5236/2908/1027/1634/5155/7162/2719/55139/5211/56925/302/2542/5578/23036/839/6781/284119/54541/3486/8660/2632/6515/4214/4015/7043/10957/133/3073/9380…
HALLMARK_PI3K_AKT_MTOR_SIGNALING	HALLMARK_PI3K_AKT_MTOR_SIGNALING	103	0.335601	1.99874	4.14683e-05	0.00011519	3.15256e-05	5753	tags=49%, list=31%, signal=34%	6773/7132/207/10392/5879/5894/1019/1017/8737/5606/6016/6885/7184/7852/156/466/6197/27071/5781/2885/5335/6503/1956/10097/8569/4803/4615/1027/1213/7529/5608/5216/23236/5899/4690/7249/9630/5563/811/5499/81579/7323/7074/5594/1072/4087/57521/51295/5599/6195
HALLMARK_APOPTOSIS	HALLMARK_APOPTOSIS	160	0.335026	2.14909	1.00749e-07	7.19638e-07	1.96954e-07	6609	tags=52%, list=36%, signal=34%	994/2064/118/4092/1017/4313/3005/7049/351/595/90427/5970/1806/5159/6709/835/1611/5526/637/3459/599/1499/840/8837/6041/5534/3482/650/5327/27250/3875/633/331/894/7042/2936/4739/6093/5747/837/1027/1634/836/841/1647/7078/3082/839/2012/2149/5538/6304/5330/3315/4170/7077/1676/4060/857/581/5551/5914/388/2026/2065/6574/10410/665/4000/51330/301/8878/552/834/7465/929/56172/1387/89941/6648/8870/8915/960
HALLMARK_MYC_TARGETS_V1	HALLMARK_MYC_TARGETS_V1	199	0.314116	2.09128	1.94327e-07	1.21455e-06	3.32402e-07	5369	tags=46%, list=29%, signal=33%	23435/3615/23196/1019/1017/6434/6428/11331/26354/6146/1973/6432/5706/6426/3068/1665/6128/1207/7411/10236/220988/26156/9221/6427/7913/23450/328/3326/790/56910/8886/7555/6175/6193/1964/6418/10399/3183/3178/5230/3376/5250/10492/7324/5245/10935/1982/4869/4673/2739/3184/6741/8664/5688/7514/1933/10146/7458/3181/6059/2058/4175/5093/6240/6188/4171/10728/4174/6187/2806/26135/9188/7416/821/4609/11335/3329/…
HALLMARK_TNFA_SIGNALING_VIA_NFKB	HALLMARK_TNFA_SIGNALING_VIA_NFKB	197	0.309396	2.04981	3.39285e-07	1.88492e-06	5.15872e-07	8059	tags=63%, list=44%, signal=36%	4088/2114/9516/23258/595/5970/5606/8303/182/5341/1435/7185/8837/57018/5329/10318/7050/650/694/1942/7280/3398/5806/22822/8613/24147/10135/25816/329/4790/9034/3572/5328/1316/2526/80176/2355/3280/23308/11080/7422/23586/23529/1647/1880/10611/3976/3433/1326/56937/5142/4791/65986/8660/6515/5791/10957/4170/4609/8767/9322/7128/10725/3383/7097/3624/4780/388/1906/9308/490/6776/4783/4792/5971/9334/2919/1500…
HALLMARK_GLYCOLYSIS	HALLMARK_GLYCOLYSIS	200	0.300818	2.00118	1.3111e-06	5.4629e-06	1.49511e-06	7346	tags=57%, list=40%, signal=35%	9672/2131/50808/5066/5631/501/10327/2132/5256/2745/10370/2997/7852/55276/6120/8702/3597/6383/5917/9276/7045/5230/375790/5373/10165/10020/29926/5516/1956/5836/4190/79644/2585/22796/6391/9653/5351/54480/23443/11015/8974/9435/7436/30001/5318/10007/6382/1289/7422/4233/1634/7162/54982/2719/55139/1824/10058/2542/90161/5834/23036/2729/839/1462/6781/54541/5352/3486/1738/112399/8660/2582/51728/2806/178/26…
HALLMARK_IL2_STAT5_SIGNALING	HALLMARK_IL2_STAT5_SIGNALING	198	0.299663	1.99429	6.04413e-07	2.74733e-06	7.51901e-07	6609	tags=54%, list=36%, signal=35%	130589/5325/79971/2983/23258/152007/23413/5045/3587/7133/10970/7494/200734/23075/1435/7185/3177/3459/1154/8829/8728/5339/3563/8202/1291/81848/3482/123/10924/650/3685/3480/22822/894/7372/596/5292/6696/83699/79026/1316/5359/7052/4643/64116/4641/214/23208/5025/836/57045/975/659/196/3976/9249/64375/8809/2012/1326/57157/896/6515/3560/1522/5167/962/80760/5727/4609/9446/5583/253558/822/6402/5033/7074/38…
HALLMARK_INTERFERON_ALPHA_RESPONSE	HALLMARK_INTERFERON_ALPHA_RESPONSE	96	0.294768	1.74365	0.0023469	0.00391151	0.00107052	6368	tags=52%, list=35%, signal=34%	6773/85363/7318/3660/9246/103/1435/3431/6737/85441/10379/54625/1997/5610/684/9034/5720/11274/10544/5359/7726/4061/93343/841/54809/1267/83666/3433/10581/3665/135112/3437/55601/9111/219285/55603/961/55072/8767/5696/6402/10410/10561/716/7706/567/834/115361/11054/3430
HALLMARK_COAGULATION	HALLMARK_COAGULATION	136	0.291091	1.80342	9.81913e-05	0.000223162	6.10759e-05	8731	tags=65%, list=47%, signal=35%	824/5879/1508/4313/55970/5641/5045/4048/649/5341/3075/8609/4323/5627/1803/5654/2/10404/5327/2335/3426/4035/10411/8754/1519/1848/3920/3690/2534/5328/378/8237/6678/1513/8309/5155/2783/7078/2200/5028/7057/2159/7450/3673/710/4320/1465/928/712/716/301/715/22921/11098/23764/2151/2160/4153/2934/7980/5055/4316/629/1510/7056/5265/5624/3172/9104/5196/2147/553115/3249/5340/5550/731/345/1512/3697/1361/344/32…
HALLMARK_UNFOLDED_PROTEIN_RESPONSE	HALLMARK_UNFOLDED_PROTEIN_RESPONSE	112	0.287179	1.70741	0.00152802	0.00274805	0.000752097	7464	tags=60%, list=40%, signal=36%	6464/1974/23404/22872/10130/9652/1973/55033/7494/5832/7184/9221/4848/23478/64924/5394/2081/6745/9451/6897/8602/6734/7280/60559/3376/7534/4869/4801/11015/9797/30001/167227/7422/2521/57472/54541/6208/1938/811/1736/468/10797/10528/9775/11260/27230/3313/22926/55738/3309/23644/29968/1978/6347/9136/23517/1981/30827/5611/8815/9709/10897/1639/1051/55272/3014/10113
HALLMARK_MITOTIC_SPINDLE	HALLMARK_MITOTIC_SPINDLE	197	0.282896	1.87424	1.10049e-05	3.23673e-05	8.85842e-06	6028	tags=50%, list=33%, signal=34%	10006/64411/2316/5311/998/4926/81/5829/6453/7461/57679/6709/4627/25/8243/274/23365/5981/10160/3996/1739/11346/23580/7204/2317/9732/11135/2017/10928/6711/26271/10435/23637/4983/10276/4628/85378/6904/7414/29/51199/79658/4739/3797/6780/6093/8874/23647/4643/357/55785/6654/8976/22930/2035/64857/84376/9113/23012/4281/51174/10611/24137/10801/4853/23607/613/25777/4690/10013/4296/23332/127829/10163/1778/5…
HALLMARK_KRAS_SIGNALING_UP	HALLMARK_KRAS_SIGNALING_UP	196	0.279776	1.84722	9.98556e-06	3.12049e-05	8.54028e-06	7252	tags=56%, list=39%, signal=34%	25960/54677/208/3689/3587/7133/7805/2324/2745/3075/7185/23268/7852/2048/2995/8829/22903/5329/23080/3728/3481/650/5327/3398/7035/894/84869/2982/51199/1848/51193/6696/55273/219333/5328/2113/6480/10806/2791/4803/79810/30001/1438/83483/5936/6616/4013/9949/6801/3976/7102/2012/3486/28951/5178/6304/4214/719/4674/3673/5649/2556/2254/7128/1520/2207/5121/5696/10253/9935/3624/27075/7813/1363/4320/90865/1635…
HALLMARK_MYOGENESIS	HALLMARK_MYOGENESIS	198	0.278674	1.85461	9.49548e-06	3.12049e-05	8.54028e-06	5096	tags=38%, list=28%, signal=28%	10278/1974/1266/2049/208/1140/351/3693/4851/4205/6016/23654/7040/6709/5740/6445/4209/4627/274/25937/11156/4684/1284/187/10014/3270/3688/375790/6840/1728/9260/5507/1292/29970/1293/6678/1489/1837/43/948/165/6300/4641/6525/7004/9659/1756/8038/7170/5569/89797/1281/6444/5925/7169/4638/3486/25970/3316/7249/115/1277/4634/10290/5348/178/537/3983/4208/8082/1674/3679/10468/624/1760
HALLMARK_INTERFERON_GAMMA_RESPONSE	HALLMARK_INTERFERON_GAMMA_RESPONSE	198	0.278503	1.85346	9.618e-06	3.12049e-05	8.54028e-06	7252	tags=55%, list=39%, signal=34%	6773/5371/10392/8737/57674/3587/3660/9246/103/3075/3431/6737/85441/840/10379/54625/8202/10068/26053/5610/84159/694/684/6774/10135/7903/5292/3091/4790/57162/5720/11274/5359/5321/7726/10791/4061/4615/25939/837/23586/6892/836/5771/841/3455/6398/6717/3433/10581/5142/51015/3665/3937/3437/3560/55601/9111/219285/6772/710/55072/8767/7128/84888/3383/7412/5683/8082/10797/5696/84166/5777/4792/57823/10410/10…
HALLMARK_INFLAMMATORY_RESPONSE	HALLMARK_INFLAMMATORY_RESPONSE	199	0.265363	1.7667	8.75345e-05	0.000208416	5.704e-05	7786	tags=59%, list=42%, signal=34%	10006/5894/3678/8578/4067/3587/5970/7133/23166/1902/4891/1435/2550/2773/10203/1441/187/4323/1536/5329/5610/5099/684/10135/3091/3690/4790/9034/27032/3759/1316/9435/4061/4693/92/7855/23308/1317/4233/5025/7162/6892/114548/2719/1880/196/9180/5739/3976/6717/8809/6869/5142/10242/3665/3937/91/3560/5791/962/558/719/9111/133/2014/10630/10507/4609/8767/5027/3383/3454/3386/6402/7097/3624/1906/490/4792/13156…
HALLMARK_COMPLEMENT	HALLMARK_COMPLEMENT	197	0.263802	1.74774	7.83684e-05	0.000195921	5.36205e-05	7477	tags=54%, list=41%, signal=32%	5894/1508/64145/5641/5547/4067/3660/4048/4855/7511/5341/3075/2773/1075/4179/1284/840/2771/843/8445/4323/1803/9732/5329/10404/5327/2335/4035/8754/2885/1519/5516/1848/23414/3920/5292/2534/308/5290/9097/5359/5321/948/2764/837/2219/5155/2783/836/30819/55619/714/5216/6280/23348/2793/2625/59345/3665/3937/3988/2159/11108/7077/710/7128/1520/868/2207/3684/11216/7454/1465/712/2919/716/255738/391/715/966/16…
HALLMARK_ANDROGEN_RESPONSE	HALLMARK_ANDROGEN_RESPONSE	99	0.258732	1.51664	0.0161666	0.0224537	0.00614521	6285	tags=48%, list=34%, signal=32%	10645/207/3005/595/6722/54407/2773/3998/87/6197/10627/3856/57178/4094/84159/3685/60559/3880/51171/23585/2982/8916/25816/7520/2936/9510/6414/1021/9218/3977/10611/3248/56937/65986/896/7329/1836/5238/10257/6652/6611/567/9871/2683/658/8611/23171/56172
HALLMARK_ALLOGRAFT_REJECTION	HALLMARK_ALLOGRAFT_REJECTION	197	0.252931	1.67572	0.000223824	0.000466299	0.000127619	7666	tags=55%, list=42%, signal=32%	10006/207/2316/3551/3689/4067/322/920/23166/6885/7040/1435/3459/16/1615/5917/2000/894/3059/1956/7042/7903/2589/3091/7070/4869/2113/6189/8664/940/92/43/9466/23308/7321/6059/6892/3111/114548/3455/10261/924/10333/3976/6891/2149/6203/8560/4690/1234/1445/3665/3937/896/3560/6772/4689/961/8767/1520/3383/822/7097/3624/5551/9655/5777/7454/6356/3109/5788/586/729230/3394/1230/567/7096/3133/2650/8661/958/569…
HALLMARK_MTORC1_SIGNALING	HALLMARK_MTORC1_SIGNALING	199	0.234176	1.55906	0.00153891	0.00274805	0.000752097	7621	tags=55%, list=41%, signal=32%	2717/6715/3689/11151/5641/5606/5706/4048/23760/7494/6016/6472/2745/51569/900/7184/23478/7852/1075/871/6117/51377/6745/5230/27071/3488/6533/6503/23062/10135/4802/2936/10097/6917/7436/23165/30001/6241/5236/2058/5860/120/899/5211/2542/2729/7037/6781/54541/116496/5352/134429/4171/112399/2632/6515/10962/908/811/54843/821/7323/3329/10797/5033/5478/5693/80777/27230/4783/928/6652/3313/586/9368/79071/3145…
HALLMARK_ADIPOGENESIS	HALLMARK_ADIPOGENESIS	200	0.229	1.52342	0.00299661	0.00483324	0.00132278	6219	tags=42%, list=34%, signal=28%	112/369/23187/134147/334/6453/23344/83871/901/55177/8322/3910/847/10162/3459/1431/1629/1282/51727/123/51635/64225/977/27250/1147/84919/10935/6391/7532/284/7423/10243/948/56922/8436/5236/29088/29979/5860/3977/1647/2053/5211/128338/5733/7086/11194/284119/1737/1349/4638/2040/1738/2632/204/10313/57678/8491/6342/80760/84895/51/6573/8082/3679/9936/137964/51805/6776/7263/1351/217/4023/8404/10580/34/7907…
HALLMARK_G2M_CHECKPOINT	HALLMARK_G2M_CHECKPOINT	196	0.225663	1.48994	0.00462305	0.00700462	0.00191706	5279	tags=37%, list=29%, signal=27%	387893/994/4088/5371/1432/3151/1019/4926/10274/6434/11044/10664/595/91746/8899/6426/7040/9221/6427/25/8243/4211/3930/94239/4172/6760/10772/26271/1112/5926/4691/8065/10492/3364/1946/3091/546/7150/3184/9252/23047/7514/51776/10146/1027/6421/5933/10419/4175/1756/24137/899/4331/3609/7112/4288/9212/4853/4212/4171/4174/81539/1736/5885/4609/6599/3192/51203/580/7486/890/23649/4001
HALLMARK_XENOBIOTIC_METABOLISM	HALLMARK_XENOBIOTIC_METABOLISM	197	0.224962	1.49042	0.00424471	0.00663236	0.00181517	8859	tags=62%, list=48%, signal=33%	7132/128/2114/54677/64087/23564/6472/3487/847/6560/670/4522/55748/1725/5627/1969/7358/3728/10299/51635/22949/435/3398/10857/6533/23169/1728/2028/7042/10717/2936/57447/645/2192/948/8309/10611/115817/2729/839/5467/84913/10728/5831/53/2159/7009/54498/51/3931/8310/9446/26999/51380/10776/217/4121/586/2618/5909/3394/1036/9663/6747/3294/5699/3554/6999/9361/3479/2160/978/29785/4153/27232/873/629/2326/906…
HALLMARK_HEME_METABOLISM	HALLMARK_HEME_METABOLISM	197	0.218752	1.44927	0.00667963	0.00982298	0.00268839	4756	tags=35%, list=26%, signal=26%	23351/118/55810/1508/10181/6536/2235/3005/6386/114625/5606/57610/3321/3068/51274/23530/2145/4891/5526/847/23365/2995/4059/8301/66008/8991/140609/1371/4005/129642/56895/7001/26020/2057/8850/3920/27102/645/6917/7150/8974/7145/7716/9562/2309/6886/2908/2035/4354/5498/23002/10058/80344/2729/6622/7037/11163/9258/6710/8273/2996/896/26268/9429/10098/4779/54498/6521
HALLMARK_FATTY_ACID_METABOLISM	HALLMARK_FATTY_ACID_METABOLISM	155	0.216109	1.3728	0.0173135	0.0233966	0.00640328	8570	tags=57%, list=46%, signal=31%	8801/387893/1743/7533/3295/2639/549/9246/51170/328/57515/5160/670/7358/1371/84693/58505/6392/4190/6391/5720/8803/5793/948/5465/3420/1962/1429/3248/1738/3028/158/51166/4683/6584/51/9380/1632/3155/2819/728294/4913/2026/30/34/6611/5092/10965/51478/51179/658/1056/224/226/6999/51109/2194/210/3956/873/10449/2326/23710/6296/37/8639/762/3939/5805/10455/3157/11343/50814/3033/2110/3032/644/50/3417/2168/202…
HALLMARK_P53_PATHWAY	HALLMARK_P53_PATHWAY	198	0.213942	1.42381	0.00784201	0.0112029	0.00306605	8094	tags=56%, list=44%, signal=32%	7508/3275/6256/29927/5154/2258/351/3945/4851/23654/7040/57763/900/677/8841/5900/8518/55035/7157/79651/5912/4193/1969/317/10399/650/694/3654/23169/894/10057/10608/9538/6667/10544/51447/2309/1263/6382/26207/1647/4013/975/3976/5925/56997/2149/54541/7867/5784/2040/29946/9883/896/91/3714/5791/55270/9618/10904/25898/23378/2760/51768/64393/581/4071/26999/51499/6206/578/92815/23612/6141/6004/18/100/7135/…
HALLMARK_SPERMATOGENESIS	HALLMARK_SPERMATOGENESIS	135	-0.669172	-3.77459	1e-10	1.25e-09	3.42105e-10	4527	tags=76%, list=25%, signal=58%	4842/2475/8028/814/3010/64395/2918/1761/29106/4543/126669/23397/1636/2672/4889/254263/7142/4771/7141/7419/7272/5620/3306/1132/5576/23175/27285/4225/6790/4751/54760/5414/3595/148066/11144/3267/10047/3416/7091/10880/51298/9892/4956/4867/8100/9133/6847/165721/5884/55342/1630/8161/56903/81570/10926/83445/51087/23617/8277/8852/51686/26330/2515/64180/11004/22824/54558/56/10124/3361/1033/3305/5261/3598/…
