# Supplementary material for: Dynamic Expression of Palmitoylation Regulators across Human Organ Development and Cancers Based on Bioinformatics
Source: Curr Issues Mol Biol. 2022 Sep 27;44(10):4472–89. doi: 10.3390/cimb44100306 (PMC9600046; doi:10.3390/cimb44100306)
Supplement: Supplementary file 1 [file cimb-44-00306-s001.zip › Supplementary_Table S4.csv]

symbol	Brain.4wpc.1	Brain.4wpc.2	Brain.4wpc.3	Brain.5wpc.4	Brain.5wpc.5	Brain.7wpc.6	Brain.7wpc.7	Brain.7wpc.8	Brain.8wpc.9	Brain.8wpc.10	Brain.8wpc.11	Brain.8wpc.12	Brain.9wpc.13	Brain.9wpc.14	Brain.9wpc.15	Brain.10wpc.16	Brain.11wpc.17	Brain.11wpc.18	Brain.11wpc.19	Brain.11wpc.20	Brain.12wpc.21	Brain.13wpc.22	Brain.13wpc.23	Brain.13wpc.24	Brain.16wpc.25	Brain.16wpc.26	Brain.18wpc.27	Brain.19wpc.28	Brain.19wpc.29	Brain.19wpc.30	Brain.20wpc.31	Brain.20wpc.32	Brain.newborn.33	Brain.newborn.34	Brain.newborn.35	Brain.infant.37	Brain.toddler.38	Brain.toddler.39	Brain.toddler.40	Brain.school.41	Brain.school.42	Brain.teenager.43	Brain.teenager.44	Brain.teenager.45	Brain.youngAdult.47	Brain.youngAdult.48	Brain.youngAdult.49	Brain.youngMidAge.50	Brain.youngMidAge.51
LYPLA2	4.573333693	4.698393298	4.714578877	4.071465653	4.420238557	4.269822001	4.622225417	3.67251078	4.618883265	4.196740729	4.037656128	4.560118521	5.025804376	4.858510992	4.844418704	4.098718783	4.81432445	4.375334878	4.934147166	4.950575143	3.385872509	4.593162294	4.064275111	4.391655813	4.4521117	4.053366237	4.19547408	3.745318182	4.042436581	4.693130406	3.776946856	3.971224309	4.885693013	4.211403423	3.947675523	4.212797838	4.467477372	4.202172852	4.190935056	4.072804897	3.593420419	4.337234907	3.701986236	3.749504248	3.728255296	3.121565194	4.092084029	3.989473065	2.440389738
ZDHHC6	4.717360531	4.603325228	4.853501794	4.737376442	4.626877123	4.389543631	4.403671287	4.05342602	4.235414382	4.309385405	4.059514761	3.960821692	4.074342904	4.173974769	4.054136963	4.153602385	3.942758229	4.185546607	4.071803327	3.864538843	4.059951827	3.877679329	4.2028559	3.842816159	3.923374612	3.826532177	3.532406535	4.022341455	4.039525739	3.85640574	3.980304208	4.099547933	3.501029313	3.640592091	3.879336613	3.618258667	3.75504455	3.684624712	3.713956753	3.705553204	3.71703525	3.780009299	3.67045922	3.777482392	3.807178257	4.003392057	3.434375875	3.542778364	3.71168317
ZDHHC8	3.556542525	3.449016469	3.177579659	3.044589354	3.474213522	3.657462595	3.975268814	3.255847009	3.381447913	3.476922274	3.519975387	3.33689561	3.627154371	3.809001423	3.668911154	3.531766338	3.82000067	3.457390815	3.548147425	3.44206787	1.639354597	3.21953243	3.363733935	2.712809336	3.485576333	3.137817854	3.484982164	3.80333842	2.71843434	3.48759953	3.23610546	2.606800848	3.960382323	3.423523159	2.50927367	3.965451187	3.285254109	4.605865714	4.390890001	4.045183764	3.426360051	3.596748781	2.918215494	3.626769726	3.668062798	2.252621564	4.177593633	3.04755411	2.629408783
ZDHHC15	0.822428402	1.04492983	0.964108661	1.425509365	1.073473679	1.756284052	1.602417352	2.262700621	1.626529204	1.698739726	2.033908608	1.554570293	1.338969399	1.561795874	1.744961927	2.358088871	1.830344308	1.676391244	1.463385978	1.570767158	2.252985823	1.738151471	2.456865329	1.647972005	1.384369195	1.787618075	1.511810459	1.835769714	2.00080626	1.328515782	0.99734775	1.747780073	1.016998346	0.898343435	0.50716371	0.138263121	-0.244113288	-0.500731867	0.068666185	0.233813371	-1.19176792	-0.182224331	-0.143727208	0.527491928	0.001838228	1.258254734	0.353234688	0.112505371	0.518218239
ZDHHC2	1.8061714	1.667328815	1.756094912	2.185886845	2.022195346	2.432733331	2.65639859	2.596267671	2.286747049	2.660164008	2.62726799	2.359291961	2.061382586	2.12030114	2.261848749	2.934474236	2.160613976	2.575036593	2.140509581	1.983658902	3.703261941	2.305132709	3.276003923	2.339797581	3.255129259	2.649788021	4.187893916	2.31786404	4.433854446	3.21045702	2.666309699	3.534798531	3.611823367	2.869240084	2.574913636	2.249773096	1.64133547	1.493938869	1.758999681	1.90691055	2.060411641	1.436800629	1.855468611	1.636009683	1.512888985	2.986791003	1.506910764	1.15160869	2.71585577
ABHD17B	4.023844553	3.661766629	4.088200341	4.023800786	4.143394995	3.79512758	4.150058954	3.775145357	3.900590812	4.09629719	3.452536627	3.900712023	3.721383382	3.844212984	4.050081224	4.109227101	3.564801127	4.008388263	3.883241711	3.665875326	4.312126965	3.881309797	3.68817656	3.368095833	4.258187564	3.786805683	3.911078388	3.262249769	3.970536269	3.706361875	3.801949733	3.783420181	3.112691651	3.099232341	3.056665063	2.816820771	4.650889204	2.653506782	2.477795082	3.578171035	5.354922109	3.020977599	3.352981019	3.245877999	3.113196292	4.564663153	2.619889331	2.441628803	3.352567149
LYPLA1	4.083448848	3.848185888	4.441933318	4.315430486	4.401856432	3.192913206	4.020263776	3.812326175	3.440206833	3.783849072	3.478852051	3.287125665	3.040111684	3.432649988	3.330026506	3.546871161	2.543394252	3.508069564	3.126291418	2.639154193	3.367785759	2.441348238	3.552424706	2.693107367	3.26037438	2.461191251	3.171402913	2.656588407	3.586889995	2.324226822	2.743537531	3.196475021	1.748430784	1.826593221	2.245706708	2.55470067	2.111546497	2.099489549	1.995483667	2.387578394	1.018676048	2.332767712	2.249221633	2.217014942	1.751594604	2.326272625	0.387082817	1.712842852	1.593682438
ABHD17A	2.304964328	2.090122167	1.853521101	1.294741209	2.124869568	2.874833289	2.930777204	1.979978843	3.180789889	2.542963759	2.43182252	3.064880909	3.392199334	3.274800903	3.400721978	2.690371286	2.915188565	2.965080857	3.43445474	3.022969756	1.101507477	2.799067129	2.001048479	2.161499974	2.882886782	2.388267648	3.150632718	3.348598245	1.928795186	2.826237471	3.25615907	2.25783484	3.346076948	2.623949095	2.379103688	3.660041446	3.353759867	4.148248311	3.903508123	3.587461118	4.182061503	3.903237529	2.137062207	2.853970254	3.108444363	1.986723693	3.911846495	2.542972357	2.275873119
PPT1	5.358611237	5.205129758	5.538933455	5.392176674	5.377852697	4.972664356	4.796808338	4.660754475	4.398872903	4.533953251	4.292602766	4.387616991	4.399966919	4.334503567	4.637089398	4.766656338	4.722445501	4.378679499	4.490636929	4.732987772	4.255567067	4.406828366	4.76675001	5.138450856	4.526430589	4.607206066	4.237597144	4.250160797	4.548367499	4.412188327	4.1315718	4.343464245	4.804398733	4.73782521	4.743068162	5.651850958	5.919996779	5.882013975	5.689147447	6.028047647	5.626516511	6.008074811	5.88866808	5.983239507	5.973078666	6.254238378	5.902181577	5.981565305	5.853947936
ZDHHC4	3.659203167	3.655256256	3.614364808	3.501923976	3.628100456	3.485912871	3.562792067	3.276597916	3.268758317	3.223608087	3.092987156	2.926819042	3.410283224	3.626065608	3.48678036	3.125869793	3.613695702	3.162699479	3.419738181	3.555055719	2.755753529	3.09867484	3.33320084	2.92498106	2.865121643	3.019955075	2.90563996	2.899265361	2.766257667	3.037360179	2.83864015	3.064842822	3.391632623	2.981252599	2.913668038	3.522689937	3.639265402	3.571193093	3.203663239	3.247664449	3.460381599	3.5918695	3.227553765	3.29324509	3.394648505	3.461704332	3.41449917	3.572062282	2.82430789
ABHD17C	3.17686684	2.621535434	3.035943304	3.215627178	3.292311812	3.517530525	3.706019443	3.054334397	3.915164157	3.576471487	3.362858011	3.567937936	4.038399456	3.433093179	3.901150694	3.788281024	4.056699222	4.325358899	3.797840808	3.666655575	4.541441426	3.870444298	3.944213388	3.807969057	3.277070124	3.10498808	3.54953459	2.412310044	3.653904147	3.955722394	3.40933329	3.111855853	3.481581536	3.102546644	2.758543439	3.35771755	2.909218097	2.572582288	3.075823836	2.621064208	1.377897507	2.838842785	2.792033682	2.575231311	2.733555694	2.788075254	2.792448704	2.2726905	2.66187668
LYPLAL1	1.889771842	1.42953334	1.706906367	2.065681605	2.019429895	1.386066891	2.202778898	1.948649466	2.004802237	2.068731348	1.814203365	1.891708524	2.264036813	2.35403692	2.19642274	1.79942591	0.935242289	2.356943967	2.257242265	0.873819248	1.696199472	1.197302338	2.014356628	1.809311964	1.878658348	1.296130475	1.832152187	1.811642554	2.28707601	1.384768303	2.296661566	2.112295608	1.559408446	1.782051736	2.82789884	2.991853766	3.240984986	2.058495087	1.933936409	2.245939587	3.693083767	2.669694402	2.55660546	2.258560081	2.362821483	2.914886533	1.575110898	2.418046397	2.484015907
ZDHHC7	3.942013367	3.742972076	3.831828924	3.455215951	3.624278954	3.700339674	3.474033293	3.099554763	3.413586931	3.271836181	2.625550138	3.319901236	3.383892169	3.49062834	3.408841745	3.060284	3.465190514	3.186738525	3.517663769	3.355225376	3.226908719	3.376938763	3.167976123	3.56809022	3.52205935	3.33199152	3.281359248	3.229550263	3.428589036	3.320192755	3.236645811	3.524649403	3.811916527	3.237551683	3.657689477	3.381007342	3.648093258	3.41118267	3.751994302	3.530318907	3.382388481	3.292467646	3.617175754	3.612605602	3.609182974	3.707073007	3.374831387	3.677678117	3.287863966
ZDHHC5	3.886418083	3.842332557	3.843994605	3.398790057	3.625345332	3.381459936	3.314501075	3.295963023	3.055722555	3.168592803	2.800969666	3.092436431	2.848256838	2.998825749	3.324084117	2.908004457	3.66646481	2.935950934	3.099783656	3.63854964	3.266884399	3.685207044	3.414596681	3.432031885	3.488837545	3.569112706	2.967686066	3.020828932	3.202010259	3.133803626	2.675818098	3.239946732	3.185160477	3.03418552	2.777262909	3.333499765	3.019236709	3.720507324	3.281587748	3.440042603	2.709353299	3.03616988	3.415061229	3.478338323	3.455031774	3.640509862	3.220350132	3.284752717	3.163472226
ZDHHC1	0.952403718	0.743725033	0.638982257	0.508822271	0.888410961	1.337758639	1.635155127	0.695105156	0.767315885	0.817898315	0.748017555	1.624549609	1.34897497	1.529402733	0.869279733	0.294158794	0.761706167	0.128740362	0.387762688	1.095992075	-1.868722562	0.078945732	0.06840474	1.42199225	-0.377669643	-0.194443899	0.377308385	0.70131843	-0.767215817	0.007098455	0.293585274	0.138972331	1.550720386	0.884805522	0.807604999	1.516936576	0.888575823	1.007539968	1.292116881	1.50952591	1.0882489	0.898442787	0.516788379	0.847131029	1.630332945	0.352279033	1.591719425	1.291694224	1.242874496
ZDHHC12	1.478090442	1.808709097	1.71986911	0.620896956	1.54065964	1.402094722	0.421399662	0.427111304	0.354983217	0.430412031	-0.977383211	-0.165003211	1.030255095	0.595292139	0.718225884	0.037893634	1.150855561	0.151085363	0.984674015	1.283202268	-2.27549625	-0.277329487	-0.238036584	0.074699739	-0.538018643	-0.208846603	0.367914434	0.070915446	-0.538643405	0.97090347	0.076810572	0.014386416	1.934568851	0.648350235	-0.016370496	1.845302352	1.406381385	0.160259451	1.338795576	0.41454405	2.26994829	1.503755475	-0.064045103	0.479224706	0.240738526	-0.141912649	1.21672299	0.589943712	-0.528937167
ZDHHC3	3.278124901	3.179886272	3.202996804	3.092939591	3.11215219	3.214039478	3.057894141	2.792793725	2.953507734	2.759238938	2.561079605	3.082581027	2.903122762	2.753610749	3.121505249	2.977663064	3.268408846	2.837357564	2.907063192	3.152835081	3.08169473	3.184294036	2.961058189	3.31724201	3.217757848	3.046153761	2.997130093	2.915000779	3.148330272	3.135268491	2.780904148	3.206926418	3.457519169	2.904116304	2.730665785	2.925108244	2.890400715	2.947431434	3.009935776	2.979647073	2.669139218	2.797474257	2.931837069	2.979423578	2.887214388	3.201540673	2.801780218	2.901972411	2.869645822
ZDHHC19	-2.622684114	-3.178397378	-3.356875754	-2.365348446	-3.428468001	-2.495589251	-2.348621811	-3.498485282	-1.355102011	-1.792876535	-1.669423284	-1.006282186	-0.663538614	-3.013508415	-1.426920825	-2.53847533	-2.856115818	-3.201609309	-2.556695338	-2.187642468	-5.29974374	-3.257971287	-4.089884062	-2.171230179	-1.027430862	-2.656881844	-2.002195269	-3.98269088	-3.650202375	-2.313996586	-1.864121889	-3.940408354	-2.107831699	-1.982547979	-2.396637363	-0.25968693	-1.314030362	-1.578515392	-2.063529248	-1.307687976	-1.318545821	-1.499503668	-3.41481391	-1.423233514	-1.61405145	-3.319727426	-1.813398546	0.110330629	-3.442910434
ZDHHC16	3.694005328	3.562184501	3.726461758	3.366580824	3.572650715	3.607160073	3.609051387	3.106345367	3.493804185	3.330838635	3.000602799	3.497526388	3.656691541	3.597439818	3.493263865	3.19143788	3.639518605	3.296640089	3.428621483	3.613717596	3.239842072	3.603223407	3.309983759	3.708741831	3.334078122	3.290138232	3.340950185	3.313255718	3.388187626	3.738812518	3.22810661	3.40245431	3.82301989	3.23100793	3.175318774	3.755340968	3.836759083	3.794276552	3.497168586	3.628664792	3.128052446	3.706449934	3.328780655	3.665034509	3.672043007	3.330327146	3.280177138	3.563990102	3.350573243
ZDHHC24	0.212789056	0.197202593	-0.353264978	-0.335820063	0.142130357	0.408958993	0.017631599	0.214858555	-0.028757315	-0.192281832	0.103350498	0.800270468	-0.153901599	0.129109954	0.002297122	0.507594003	0.862691921	-0.469339482	0.308844598	0.656490202	-0.260710456	1.194255303	0.381965888	0.318935157	0.569563165	0.383352361	0.605982707	0.815559698	0.261804701	0.533837482	0.868317367	0.482348636	1.263272222	0.663146343	0.260742845	1.10582133	1.860862352	2.021477837	1.536191463	1.422232524	1.87306147	1.62130726	0.806000661	1.167667747	1.073492499	1.118574014	1.628343565	1.339326361	0.79750269
ZDHHC14	0.5612475	0.260472101	0.37177107	-0.963144728	0.05353369	-0.565400374	0.286344828	0.156287793	0.144317384	-0.167332888	0.60220601	1.155196589	0.957762917	0.367803736	0.19159598	-0.016027279	1.501989765	1.518488387	0.231633898	0.073502086	2.473222359	0.928165332	0.425790464	1.219768491	1.19814036	0.709486375	1.876972414	-0.158222498	1.19260313	2.019602772	0.638911574	0.998726899	2.768704253	1.892954565	2.135452817	2.937008602	3.312651556	3.55833409	3.35873468	2.753821208	2.989780623	2.806046655	2.674552243	2.642308776	2.381739614	2.240386033	2.399175379	2.371440742	1.939206595
ZDHHC21	2.705456847	2.70386713	2.7281799	2.850938315	2.701771088	2.357642599	3.205365029	3.17029619	2.457791851	3.043132298	3.288319366	2.696874321	1.908835863	2.369299103	2.43598898	2.64146497	1.117041909	2.393071346	1.986464596	1.552199462	2.688000997	1.953939983	2.638425751	2.327473767	2.665268298	1.910139152	2.440624968	2.924177228	2.990117401	1.620697826	2.370602645	2.947141556	1.543363535	1.871995052	2.152002415	2.450100303	2.397594059	2.200590323	2.38559213	2.90670665	1.773619502	2.767729936	3.08705964	2.999590893	2.620902222	3.60585012	1.840290889	2.39621592	2.85496874
ZDHHC13	2.10001772	1.880357644	1.991980452	2.211604937	2.063686828	2.277992229	2.586039088	2.323476931	2.281724817	2.842024528	2.595328464	1.943284448	2.704318834	1.660529087	2.552228768	3.005720923	2.43647556	2.823660299	2.433012839	2.419024771	2.162887555	1.695585028	2.79101918	1.520428608	2.248429044	2.044807241	1.946152145	2.539264751	2.418919745	1.425029541	1.770459106	2.333479531	1.464127937	1.275037702	1.405635072	1.165470943	0.66477172	0.677712571	0.586838231	0.870106413	0.317421521	0.830246526	1.025238063	0.812751153	0.931034574	1.194078671	0.557879739	0.763426806	0.807247536
ZDHHC22	-0.474793976	-1.155066419	-1.549282245	-1.129955055	-0.938597016	1.766949466	2.424375853	1.976130747	1.914547175	1.646879921	2.920633553	4.065451987	1.08268829	2.918804808	1.361983013	1.572994946	2.427292865	0.679467806	1.496018464	2.963178679	0.020891396	3.173120967	3.129189841	3.98697822	5.50882389	4.265710872	3.136285646	3.74507426	3.672906574	3.612988886	3.031755195	3.316239686	3.798779383	4.686058724	3.091940328	3.487871374	4.154266947	4.484738497	4.103210163	4.631094255	2.765746105	3.962012964	4.389080874	4.778228967	4.583949728	4.838238198	4.490229119	4.842899924	3.874208137
ZDHHC20	4.25547547	4.326238472	4.043603825	3.900386513	4.277814335	3.758519243	2.264106667	3.836793026	1.123862619	2.514715122	2.767149466	1.473987152	-1.995685965	-0.073909712	-0.086825567	2.908196727	1.95945761	0.494849547	-0.359822677	1.692983448	3.21820116	2.275476567	3.190114951	1.201504692	2.525874305	2.353683995	1.649895185	2.832573342	2.803505938	0.736369832	0.60329592	2.633797223	0.214519718	1.159842641	1.093686451	1.234972852	-1.143097521	-0.281113338	1.564916181	1.294142442	-0.485827273	-1.028912289	1.234704849	1.322377291	0.405676243	3.870880821	1.212841229	0.162583282	2.043667165
ZDHHC23	-0.555578469	0.218278359	-0.147406588	-0.30234624	-0.328891744	0.286450418	0.014061451	-1.237036226	1.630550019	-0.262066948	0.719190157	-0.121225157	-0.968449021	-1.715854595	-0.698903977	-0.761526897	-0.685849969	-0.580294768	-1.208357146	-1.359236673	0.884100651	2.226754619	-0.228942215	0.466322292	0.197485849	-0.454906416	0.669841631	-0.77522665	0.942174487	0.567843714	-0.44097828	1.159791361	3.196214965	1.561662277	2.11595087	2.909579594	2.483102789	2.311756959	2.384821658	3.170884966	0.265226992	2.799148684	3.330878226	3.374170047	3.152564263	3.666641308	2.148106994	2.939325429	2.789855002
ZDHHC17	3.741641329	3.541632801	3.52558682	3.72326854	3.934899254	3.390809704	4.033588558	4.208822591	3.574843135	3.933093834	4.381072327	3.681643143	2.69302849	3.478984968	3.281484531	3.935592477	2.75943624	3.430941471	3.256092852	2.802731613	4.288502426	3.465683201	3.871050064	3.31617939	4.220887417	3.346164449	3.670816409	4.185834123	4.058423863	3.113727934	3.592962905	4.158657069	2.972946349	3.102992498	3.245359619	3.041953751	3.037857351	2.73591017	2.802866605	3.309880276	3.155480521	3.020279455	3.536458553	3.512194468	3.238018006	4.412177699	2.721586625	3.034283004	3.55688432
ZDHHC9	3.292936963	3.09271964	3.210870265	3.384820534	3.127311001	3.742516812	3.832417196	4.390956696	3.797968729	3.486312616	4.124157806	4.028940284	3.346736786	3.766762896	3.722836421	4.01242502	4.189418547	3.49839016	3.723256079	4.155210708	4.317919336	4.691876651	3.962055951	4.252595808	4.791231601	4.451186964	4.394064483	3.570939788	4.304211006	4.2590469	3.380057717	4.033970341	4.128463075	4.044987914	4.07816885	2.912298117	4.777722601	2.810109886	3.101569951	4.016675216	6.464057272	2.670704915	3.262518017	3.549299616	3.526219458	5.295463712	2.877599915	2.806111215	4.089128001
ZDHHC11	2.120434952	1.973345608	1.707703865	1.412658441	1.299212876	0.721579879	1.783070576	1.035886913	1.384466747	1.526851357	1.299145712	1.331290597	0.528547724	0.88821025	0.891220643	0.225633452	0.263730561	0.416374805	0.324332942	-0.255148159	-1.473493658	0.530764991	-0.243709615	-0.00955215	0.518528073	-0.860135148	0.632151544	0.875320697	-0.412834957	-0.208421697	1.02603958	0.356421862	-0.054351671	0.383588264	2.492518839	2.043798779	3.882546638	-0.609647152	-1.060813878	0.83664601	1.192023445	-0.34400734	-0.442752729	0.181361462	0.521543262	-0.476784126	1.988531214	0.316197221	2.55853268
ZDHHC18	3.046478839	2.935211554	3.07536657	2.671593829	2.901914303	3.215150256	3.237242679	3.093067954	3.443250694	3.049916133	2.700721888	3.024196036	3.310054329	3.45747749	3.377022339	2.850571492	3.478655385	2.982389033	3.561069147	3.41955769	3.127700832	3.511376827	2.741959084	2.916287323	3.724425409	3.273273392	3.332213467	2.850925123	2.976557299	3.007524387	2.844884162	3.219542636	3.170479087	3.097706412	3.318131181	2.317557675	2.435446996	2.279432155	2.625473681	2.314605364	2.289233817	2.181817226	2.453972311	2.277614062	2.607013825	2.288686493	2.505189584	2.471078272	2.202999808
PPT2	2.632867701	2.707369147	2.874624626	2.704980714	2.911201861	2.548280722	3.122269492	2.344538321	2.597151796	2.713549895	2.716627896	2.347868638	2.676319682	2.868399096	2.666719365	2.426293301	2.415750714	2.42514977	2.536252354	2.661019643	2.187875026	2.160199967	2.196353004	2.177671016	1.791704873	1.751851164	1.871328006	2.501999685	2.131243496	2.078858966	2.127214001	2.390015539	2.361489592	2.434648867	2.184748646	2.269550575	2.551463795	2.816749671	2.294533813	2.330113732	2.274252715	2.143722139	2.320329957	2.213769973	2.298274019	2.143738815	1.761307317	2.308340314	1.673922856
[truncated: 248 more columns]
